# Supplementary material
Source: publisher site journal article supplement (https://www.dovepress.com/get_supplementary_file.php?f=186217-TS2.xlsx)
Supplement: Supplementary file 1 [file get_supplementary_file.php]

## Sheet: AvsB
ProbeName	p (Corr)	p	FC (abs)	Regulation	A1:gProcessedSignal(raw)	A2:gProcessedSignal(raw)	A3:gProcessedSignal(raw)	A4:gProcessedSignal(raw)	A5:gProcessedSignal(raw)	A6:gProcessedSignal(raw)	B1:gProcessedSignal(raw)	B2:gProcessedSignal(raw)	B3:gProcessedSignal(raw)	B4:gProcessedSignal(raw)	B5:gProcessedSignal(raw)	B6:gProcessedSignal(raw)	A1:gProcessedSignal(normalized)	A2:gProcessedSignal(normalized)	A3:gProcessedSignal(normalized)	A4:gProcessedSignal(normalized)	A5:gProcessedSignal(normalized)	A6:gProcessedSignal(normalized)	B1:gProcessedSignal(normalized)	B2:gProcessedSignal(normalized)	B3:gProcessedSignal(normalized)	B4:gProcessedSignal(normalized)	B5:gProcessedSignal(normalized)	B6:gProcessedSignal(normalized)	A1:gFEFlags	A2:gFEFlags	A3:gFEFlags	A4:gFEFlags	A5:gFEFlags	A6:gFEFlags	B1:gFEFlags	B2:gFEFlags	B3:gFEFlags	B4:gFEFlags	B5:gFEFlags	B6:gFEFlags	ControlType	mRNA_ProbeName	ProbeID	PrimaryAccession	RefSeqAccession	GenbankAccession	UniGeneID	EntrezGeneID	GeneSymbol
A_23_P422350	0.021755	3.28e-05	15.1508	up	488.871	63.2399	8.71046	28.8896	259.826	64.5559	2.3634	5.33241	20.636	4.40972	24.2679	13.3539	8.7257	6.52399	4.67228	6.25314	7.07426	6.18956	1.85968	2.92472	3.94039	2.38725	2.66906	2.12992	Detected	Detected	Not Detected	Detected	Detected	Detected	Not Detected	Not Detected	Detected	Not Detected	Detected	Not Detected	0	A_23_P422350	A_23_P422350	NM_000260	NM_000260	NM_000260	Hs.370421	4647	MYO7A
A_33_P3298024	0.0293226	0.000559074	14.9647	up	1113.3	416.667	8.51762	49.7784	347.046	521.753	3.80742	21.3376	50.0315	5.08319	88.6408	14.1331	9.79453	8.68327	4.64246	7.05441	7.45993	8.82513	2.81526	4.86225	5.3118	2.54789	5.31089	2.19068	Detected	Detected	Not Detected	Detected	Detected	Detected	Not Detected	Detected	Detected	Not Detected	Detected	Not Detected	0	A_33_P3298024	A_33_P3298024	NM_001144070	NM_001144070	NM_001144070	Hs.463421	8714	ABCC3
A_33_P3342967	0.0341166	0.00128709	14.2427	up	259.446	807.99	10.3378	168.447	99.9262	444.733	5.49893	9.9259	59.3071	2.59968	90.2032	28.1972	7.9522	9.51789	4.91183	8.70712	5.82145	8.60631	3.27666	3.65009	5.56855	1.41096	5.34993	3.26772	Detected	Detected	Not Detected	Detected	Detected	Detected	Not Detected	Not Detected	Detected	Not Detected	Detected	Detected	0	A_33_P3342967	A_33_P3342967	lnc-ZNF131-4:1			Hs.634508		lnc-ZNF131-4
A_33_P3422248	0.0215502	1.67e-05	11.7464	up	290.909	89.1122	26.6649	169.257	50.9708	47.236	13.9675	9.39238	33.5896	4.30583	12.9909	13.764	8.08843	6.89822	6.24209	8.71223	4.89911	5.79494	4.54193	3.57712	4.70369	2.36128	1.9643	2.16182	Detected	Detected	Detected	Detected	Detected	Detected	Detected	Not Detected	Detected	Not Detected	Not Detected	Not Detected	0	A_33_P3422248	A_33_P3422248	ENST00000581347	XM_005258130	XM_005258130	Hs.650086	645369	TMEM200C
A_33_P3221084	0.0250229	0.000127094	11.34	up	300.945	285.293	11.7838	47.5709	66.3464	222.531	3.19044	10.9149	29.4119	8.70371	47.0389	18.2801	8.12619	8.21654	5.08714	6.98403	5.27626	7.72173	2.55636	3.78742	4.49701	3.12669	3.90574	2.51856	Detected	Detected	Not Detected	Detected	Detected	Detected	Not Detected	Not Detected	Detected	Not Detected	Detected	Detected	0	A_33_P3221084	A_33_P3221084	ENST00000525443		AK127484	Hs.289019	4054	LTBP3
A_24_P306892	0.0313829	0.000823676	11.2767	up	96.3861	444.631	12.414	50.7137	137.549	799.743	3.81315	12.9871	22.7097	14.5602	122.532	7.44621	6.79226	8.76356	5.15637	7.07966	6.2213	9.40957	2.81762	4.04264	4.09707	3.80483	5.98753	1.70139	Detected	Detected	Not Detected	Detected	Detected	Detected	Not Detected	Detected	Detected	Not Detected	Detected	Not Detected	0	A_24_P306892	A_24_P306892	NM_173593	NM_173593	NM_173593	Hs.504416	283358	B4GALNT3
A_33_P3416366	0.0215502	9.24e-06	11.0556	up	113.946	91.2279	15.6932	23.9306	116.003	304.26	3.73257	7.21288	23.8766	5.35186	33.2955	20.0277	6.97536	6.92245	5.48477	5.96487	6.01216	8.11334	2.78144	3.25023	4.17457	2.6041	3.20536	2.65703	Detected	Detected	Detected	Detected	Detected	Detected	Not Detected	Not Detected	Detected	Not Detected	Detected	Detected	0	A_33_P3416366	A_33_P3416366	NM_005483	NM_005483	NM_005483	Hs.79018	10036	CHAF1A
A_24_P14464	0.0215502	6.5e-06	11.0205	up	292.577	1213.69	96.0969	180.334	881.771	30.0068	38.3383	32.9722	59.4794	11.2956	74.4559	17.6013	8.09286	10.0621	8.07765	8.79529	8.75376	5.17535	6.18166	5.58688	5.5723	3.44827	4.93003	2.46513	Detected	Detected	Detected	Detected	Detected	Detected	Detected	Detected	Detected	Not Detected	Detected	Not Detected	0	A_24_P14464	A_24_P14464	NM_006103	NM_006103	NM_006103	Hs.2719	10406	WFDC2
A_33_P3249595	0.0250229	0.000102308	10.7874	up	79.6839	137.781	7.43233	24.3994	414.749	446.673	2.1841	25.6319	21.4092	9.03134	34.7526	26.1466	6.57362	7.38503	4.46209	5.99403	7.70299	8.61246	1.39533	5.16899	4.00043	3.16896	3.2855	3.12336	Detected	Detected	Not Detected	Detected	Detected	Detected	Not Detected	Detected	Detected	Not Detected	Detected	Detected	0	A_33_P3249595	A_33_P3249595	NM_138559	NM_138559	NM_138559	Hs.370549	53335	BCL11A
A_23_P45517	0.0215502	3.38e-06	10.4923	up	66.537	72.9736	14.6923	17.4556	52.1764	171.136	6.81876	6.3818	13.12	2.74947	17.2727	12.1935	6.36465	6.67661	5.3901	5.48947	4.93525	7.3922	3.52861	3.11048	3.28539	1.6953	2.24001	2.0409	Detected	Detected	Detected	Detected	Detected	Detected	Not Detected	Not Detected	Not Detected	Not Detected	Not Detected	Not Detected	0	A_23_P45517	A_23_P45517	NM_013239	NM_013239	NM_013239	Hs.124942	28227	PPP2R3B
A_33_P3489675	0.04328	0.00290516	10.4618	up	861.597	1143.78	21.375	120.223	548.141	1514.79	12.7621	49.7702	177.054	25.5721	181.61	15.2599	9.44082	9.98232	5.92457	8.24537	8.095	10.2817	4.40063	6.28776	7.19024	4.75137	6.73444	2.28299	Detected	Detected	Detected	Detected	Detected	Detected	Not Detected	Detected	Detected	Detected	Detected	Not Detected	0	A_33_P3489675	A_33_P3489675	NM_001198726	NM_001198726	NM_001198726	Hs.102336	23779	ARHGAP8
A_33_P3394178	0.0215502	2.63e-06	10.2746	up	206.945	127.861	4.92401	19.3346	54.1727	13.1154	3.66513	5.94802	2.75699	3.71669	14.6466	8.45233	7.68854	7.30253	3.92627	5.644	4.98719	3.98306	2.75829	3.03191	1.53455	2.19949	2.06789	1.7734	Detected	Detected	Not Detected	Detected	Detected	Not Detected	Not Detected	Not Detected	Not Detected	Not Detected	Not Detected	Not Detected	0	A_33_P3394178	A_33_P3394178	NM_001291867	NM_001291867	NM_001291867	Hs.201623	4810	NHS
A_24_P181672	0.0215502	2.51e-05	10.2452	up	502.332	615.382	68.9737	143.373	375.044	239.145	20.9103	19.614	93.9378	8.44155	111.251	44.1172	8.75716	9.17385	7.61765	8.48294	7.56835	7.8121	5.18823	4.71802	6.24757	3.09271	5.79268	4.23161	Detected	Detected	Detected	Detected	Detected	Detected	Detected	Detected	Detected	Not Detected	Detected	Detected	0	A_24_P181672	A_24_P181672	NM_001009905	NM_001009905	NM_001009905	Hs.607824	146712	B3GNTL1
A_19_P00321306	0.0387176	0.00209195	10.2336	up	5654.75	1075.96	64.8018	553.812	2345.92	3282	47.6152	107.17	523.726	26.9394	564.225	60.9357	12.1367	9.89338	7.52992	10.2338	10.1967	11.4213	6.52983	7.57201	8.77796	4.84589	8.56726	4.9874	Detected	Detected	Detected	Detected	Detected	Detected	Detected	Detected	Detected	Detected	Detected	Detected	0	A_19_P00321306	A_19_P00321306	NM_001256071	NM_001256071	NM_001256071	Hs.740662	57674	RNF213
A_33_P3264116	0.0217885	3.77e-05	10.2269	up	381.931	52.0243	4.05858	8.3624	48.5947	15.4283	3.1663	2.04838	3.64197	2.84204	12.8659	10.179	8.41685	6.31283	3.63908	4.40358	4.82993	4.21261	2.54829	1.46096	1.98005	1.85149	1.95839	1.88992	Detected	Detected	Not Detected	Not Detected	Detected	Detected	Not Detected	Not Detected	Not Detected	Not Detected	Not Detected	Not Detected	0	A_33_P3264116	A_33_P3264116	NM_198586	NM_198586	NM_198586	Hs.348351	378884	NHLRC1
A_23_P216355	0.0250229	0.000101258	10.1002	up	79.9977	31.2696	17.815	6.49817	92.4742	529.264	2.63499	7.29751	18.1353	3.83596	29.7423	13.3657	6.5781	5.79165	5.66825	4.07044	5.72262	8.84235	2.28339	3.2627	3.74482	2.23506	2.99908	2.13045	Detected	Detected	Detected	Not Detected	Detected	Detected	Not Detected	Not Detected	Not Detected	Not Detected	Detected	Not Detected	0	A_23_P216355	A_23_P216355	NM_013432	NM_013432	NM_013432	Hs.675285	4796	TONSL
A_24_P295877	0.0273858	0.000359952	9.92381	up	296.915	363.886	9.43915	31.4695	204.812	173.556	9.0942	14.1166	63.0239	3.05369	54.086	13.6022	8.1112	8.51689	4.78515	6.3865	6.76279	7.41203	3.90744	4.18025	5.66006	1.98717	4.22419	2.15008	Detected	Detected	Not Detected	Detected	Detected	Detected	Not Detected	Detected	Detected	Not Detected	Detected	Not Detected	0	A_24_P295877	A_24_P295877	NM_014704	NM_014704	NM_014704	Hs.509017	9731	CEP104
A_24_P220771	0.0319114	0.000954741	9.59815	up	4408.11	4913.72	128.296	1925.83	1479.88	3167.45	69.8481	141.047	477.023	86.8076	812.601	69.3096	11.7534	11.9558	8.49526	11.8375	9.49898	11.3666	7.12905	8.00515	8.64406	7.13456	9.1259	5.29217	Detected	Detected	Detected	Detected	Detected	Detected	Detected	Detected	Detected	Detected	Detected	Detected	0	A_24_P220771	A_24_P220771	NM_032217	NM_032217	NM_032217	Hs.601206	26057	ANKRD17
A_33_P3306146	0.0218107	3.81e-05	9.55092	up	35.7417	13.6816	34.3639	10.4115	402.916	172.563	2.37108	8.60238	16.573	7.28006	50.5955	4.84069	5.63884	5.00593	6.61619	4.71037	7.66161	7.40381	1.87987	3.46971	3.61144	2.93112	4.07226	1.53851	Detected	Not Detected	Detected	Not Detected	Detected	Detected	Not Detected	Not Detected	Detected	Not Detected	Detected	Not Detected	0	A_33_P3306146	A_33_P3306146	NM_001145031	NM_001145031	NM_001145031	Hs.77274	5328	PLAU
A_24_P210675	0.0318469	0.000934374	9.54576	up	439.409	460.547	206.269	306.03	386.134	884.535	47.0282	56.3371	204.961	4.74829	211.616	36.1629	8.59538	8.80316	9.16897	9.48579	7.60474	9.54496	6.50902	6.4967	7.40615	2.47372	7.00159	3.78668	Detected	Detected	Detected	Detected	Detected	Detected	Detected	Detected	Detected	Not Detected	Detected	Detected	0	A_24_P210675	A_24_P210675	NM_017668	NM_017668	NM_017668	Hs.655378	54820	NDE1
A_23_P34396	0.0347377	0.001414	9.37637	up	3518.75	4116.27	55.8174	422.376	1495.75	1674.82	48.8189	107.353	428.893	25.9403	518.566	62.9976	11.4135	11.7335	7.31368	9.88921	9.51448	10.4252	6.57422	7.57519	8.49614	4.7762	8.43088	5.0628	Detected	Detected	Detected	Detected	Detected	Detected	Detected	Detected	Detected	Detected	Detected	Detected	0	A_23_P34396	A_23_P34396	NM_020317	NM_020317	NM_020317	Hs.259412	57035	RSRP1
A_32_P426044	0.0318469	0.000934937	9.36463	up	1067.58	677.185	24.622	228.721	278.784	545.634	14.7545	29.5085	108.881	16.2587	177.457	36.267	9.73353	9.30453	6.12718	9.09211	7.16561	8.88693	4.62318	5.4017	6.46308	3.97803	6.68699	3.79358	Detected	Detected	Detected	Detected	Detected	Detected	Detected	Detected	Detected	Detected	Detected	Detected	0	A_32_P426044	A_32_P426044	NM_203408	NM_203408	NM_203408	Hs.143268	158724	FAM47A
A_33_P3413808	0.0234302	7.41e-05	9.34231	up	3590.6	2470.65	169.158	518.303	1792.72	1088.34	70.0297	87.0641	341.636	30.8427	480.57	89.8357	11.4446	11.0413	8.8846	10.151	9.8017	9.83689	7.13275	7.21812	8.16734	5.09686	8.31113	5.89124	Detected	Detected	Detected	Detected	Detected	Detected	Detected	Detected	Detected	Detected	Detected	Detected	0	A_33_P3413808	A_33_P3413808	NM_001124756	NM_001124756	NM_001124756	Hs.641481	80336	PABPC1L
A_21_P0014040	0.0453952	0.00334554	9.28638	up	2358.77	1381.12	7.53609	237.787	235.176	16.8443	14.6722	30.8502	56.4184	7.02861	56.0483	38.2649	10.8437	10.2295	4.47882	9.1425	6.9461	4.33855	4.61395	5.47877	5.49469	2.89346	4.30157	3.90601	Detected	Detected	Not Detected	Detected	Detected	Detected	Detected	Detected	Detected	Not Detected	Detected	Detected	0	A_21_P0014040	A_21_P0014040
A_23_P354297	0.0217885	3.75e-05	9.26234	up	135.609	105.527	8.70696	6.01	187.991	207.299	6.56467	8.17273	18.4222	3.06066	28.9736	15.8948	7.17842	7.08527	4.67165	3.9763	6.64888	7.63177	3.48525	3.39933	3.76536	1.98943	2.95216	2.3325	Detected	Detected	Not Detected	Not Detected	Detected	Detected	Not Detected	Not Detected	Detected	Not Detected	Detected	Detected	0	A_23_P354297	A_23_P354297	NM_022092	NM_022092	NM_022092	Hs.153850	63922	CHTF18
A_23_P362712	0.0324152	0.00101594	9.19294	up	352.312	378.419	9.38808	53.3413	290.741	687.957	28.8412	23.8688	55.7077	4.87887	73.0034	16.5978	8.31621	8.56526	4.7762	7.14652	7.22401	9.19966	5.71797	5.05106	5.47502	2.50252	4.88568	2.39244	Detected	Detected	Not Detected	Detected	Detected	Detected	Detected	Detected	Detected	Not Detected	Detected	Not Detected	0	A_23_P362712	A_23_P362712	NM_001301058	NM_001301058	NM_001301058	Hs.647045	83451	ABHD11
A_33_P3317603	0.0245489	9.24e-05	9.17098	up	32.8761	15.401	40.8292	25.0054	50.0013	413.338	12.9498	7.59506	19.7821	2.69407	13.1201	19.2657	5.54244	5.11492	6.86225	6.03249	4.87114	8.51113	4.4228	3.31006	3.87718	1.57406	1.97084	2.59697	Detected	Not Detected	Detected	Detected	Detected	Detected	Detected	Not Detected	Detected	Not Detected	Not Detected	Detected	0	A_33_P3317603	A_33_P3317603	NM_178537	NM_178537	NM_178537	Hs.148074	338707	B4GALNT4
A_33_P3265222	0.0334426	0.00115741	9.07083	up	104.922	1203.02	26.9818	57.8278	402.468	1346.56	55.6528	15.3371	76.5789	18.5814	43.0406	43.269	6.88586	10.0492	6.26012	7.25423	7.65961	10.111	6.77835	4.31388	5.94965	4.19732	3.70717	4.1863	Detected	Detected	Detected	Detected	Detected	Detected	Detected	Not Detected	Detected	Not Detected	Detected	Detected	0	A_33_P3265222	A_33_P3265222	NM_020775	NM_020775	NM_020775	Hs.708190	57535	KIAA1324
A_23_P100602	0.0273858	0.000362177	9.02548	up	327.01	161.026	12.8758	20.1151	332.653	205.495	4.57913	20.7554	57.2181	2.89917	83.3515	14.1945	8.21996	7.55703	5.20924	5.70687	7.40538	7.62028	3.05964	4.81552	5.51899	1.90762	5.17598	2.19698	Detected	Detected	Not Detected	Detected	Detected	Detected	Not Detected	Detected	Detected	Not Detected	Detected	Not Detected	0	A_23_P100602	A_23_P100602	NM_005993	NM_005993	NM_005993	Hs.464391	6904	TBCD
A_24_P108262	0.032092	0.000982703	9.02313	up	963.952	24.5641	14.6385	16.554	133.304	1634.21	8.63752	17.1875	26.841	11.3111	42.6881	33.7309	9.59217	5.5482	5.38509	5.40634	6.18353	10.3871	3.83755	4.50009	4.35552	3.4499	3.69038	3.62721	Detected	Detected	Detected	Detected	Detected	Detected	Not Detected	Detected	Detected	Not Detected	Detected	Detected	0	A_24_P108262	A_24_P108262	NM_001144952	NM_001144952	NM_001144952	Hs.435719	54549	SDK2
A_33_P3261636	0.0289622	0.000489118	8.94746	up	212.16	217.346	22.6992	110.876	141.453	119.381	4.53202	20.8881	61.3961	4.14631	99.9348	19.5441	7.71724	7.90003	6.00897	8.14101	6.26012	6.94442	3.04854	4.82728	5.62178	2.31957	5.56831	2.61743	Detected	Detected	Detected	Detected	Detected	Detected	Not Detected	Detected	Detected	Not Detected	Detected	Detected	0	A_33_P3261636	A_33_P3261636	NM_001004456	NM_001004456	NM_001004456	Hs.553577	125963	OR1M1
A_23_P413760	0.0215502	1.35e-05	8.89974	up	233.016	82.0453	17.1611	15.5898	759.703	65.7445	11.2918	3.75962	25.5276	9.10408	46.4406	28.674	7.83069	6.80639	5.60957	5.30916	8.55194	6.21164	4.21236	2.55356	4.27704	3.17815	3.87668	3.29902	Detected	Detected	Detected	Detected	Detected	Detected	Not Detected	Not Detected	Detected	Not Detected	Detected	Detected	0	A_23_P413760	A_23_P413760	NM_175080	NM_175080	NM_175080	Hs.731607	5026	P2RX5
A_23_P106737	0.030849	0.000767816	8.89895	up	5143.94	2751.61	197.665	1464.96	1581.48	1137.48	66.5042	127.636	561.844	45.6204	912.358	71.5822	11.9863	11.1748	9.10258	11.4657	9.60618	9.89424	7.05029	7.84868	8.89305	5.84894	9.30028	5.36682	Detected	Detected	Detected	Detected	Detected	Detected	Detected	Detected	Detected	Detected	Detected	Detected	0	A_23_P106737	A_23_P106737	NM_201412	NM_201412	NM_201412	Hs.16803	55692	LUC7L
A_23_P57588	0.0215502	1.75e-05	8.85969	up	48.1654	64.1803	7.574	13.903	62.0248	150.219	3.21906	6.96473	15.5783	4.72114	8.76471	14.0455	5.98577	6.54064	4.48532	5.1332	5.18372	7.22928	2.5709	3.20949	3.52443	2.46695	1.7205	2.18211	Detected	Detected	Not Detected	Detected	Detected	Detected	Not Detected	Not Detected	Not Detected	Not Detected	Not Detected	Not Detected	0	A_23_P57588	A_23_P57588	NM_016426	NM_016426	NM_016426	Hs.386189	51512	GTSE1
A_23_P89509	0.021755	3.47e-05	8.85649	up	72.0553	20.5044	6.61292	55.9041	89.74	145.104	3.06778	5.65096	15.2075	10.39	28.378	13.3126	6.45821	5.38024	4.31151	7.21293	5.68098	7.18805	2.50417	2.98154	3.4862	3.33612	2.91707	2.12639	Detected	Detected	Not Detected	Detected	Detected	Detected	Not Detected	Not Detected	Detected	Not Detected	Detected	Not Detected	0	A_23_P89509	A_23_P89509	NM_006461	NM_006461	NM_006461	Hs.514033	10615	SPAG5
A_24_P273253	0.0351934	0.00150483	8.80059	up	547.869	52.3924	80.0005	13.3407	226.945	2063.26	30.7441	22.9575	19.8176	25.1794	62.7219	23.6858	8.86758	6.32068	7.82195	5.07274	6.89892	10.7428	5.821	4.9861	3.8801	4.7227	4.54757	2.94164	Detected	Detected	Detected	Detected	Detected	Detected	Detected	Detected	Not Detected	Detected	Detected	Detected	0	A_24_P273253	A_24_P273253	NM_138420	NM_138420	NM_138420	Hs.441783	113146	AHNAK2
A_33_P3304963	0.0249117	9.45e-05	8.68432	up	310.074	254.408	9.90361	31.9009	133.262	62.6341	7.53203	14.5831	40.7787	10.1329	30.6197	10.0479	8.16015	8.08472	4.85161	6.40693	6.18325	6.15285	3.65315	4.23207	5.00315	3.30547	3.05356	1.88163	Detected	Detected	Not Detected	Detected	Detected	Detected	Not Detected	Detected	Detected	Not Detected	Detected	Not Detected	0	A_33_P3304963	A_33_P3304963	NM_001143759	NM_001143759	NM_001143759	Hs.119897	80313	LRRC27
A_33_P3281686	0.0299743	0.000653151	8.67735	up	602.462	337.846	24.814	82.1836	245.516	217.814	13.3761	31.949	116.667	5.46743	100.976	17.9521	8.99201	8.41961	6.13818	7.74744	6.99764	7.69485	4.47374	5.53411	6.56833	2.62754	5.58974	2.49274	Detected	Detected	Detected	Detected	Detected	Detected	Not Detected	Detected	Detected	Not Detected	Detected	Detected	0	A_33_P3281686	A_33_P3281686	NM_001077183	NM_001077183	NM_001077183	Hs.90303	7249	TSC2
A_33_P3305731	0.0420804	0.00266049	8.65013	up	345.709	341.118	4.59039	39.3981	112.022	355.081	15.4825	10.8588	62.0358	2.76359	61.3193	18.3483	8.29212	8.43198	3.82755	6.70476	5.96967	8.31948	4.70447	3.78022	5.63687	1.72159	4.50107	2.52501	Detected	Detected	Not Detected	Detected	Detected	Detected	Detected	Not Detected	Detected	Not Detected	Detected	Detected	0	A_33_P3305731	A_33_P3305731	NM_025176	NM_025176	NM_025176	Hs.631508	22981	NINL
A_23_P160154	0.021755	3.31e-05	8.57947	up	391.692	525.944	17.904	40.0138	171.278	63.6889	12.1226	16.7761	36.719	13.6584	61.4936	12.7436	8.44927	8.9729	5.67661	6.73048	6.52073	6.1732	4.32104	4.45764	4.83773	3.7118	4.50703	2.0826	Detected	Detected	Detected	Detected	Detected	Detected	Detected	Detected	Detected	Not Detected	Detected	Not Detected	0	A_23_P160154	A_23_P160154	NM_000403	NM_000403	NM_000403	Hs.632380	2582	GALE
A_33_P3239295	0.0379086	0.0019809	8.53054	up	7945.47	1025.93	123.013	173.485	325.247	537.318	40.3021	207.629	292.688	30.7378	175.719	20.2185	12.5402	9.82495	8.43364	8.74703	7.37507	8.86145	6.26176	8.59758	7.93791	5.09003	6.66889	2.67035	Detected	Detected	Detected	Detected	Detected	Detected	Detected	Detected	Detected	Detected	Detected	Detected	0	A_33_P3239295	A_33_P3239295	NM_016335	NM_016335	NM_016335	Hs.517352	5625	PRODH
A_23_P207868	0.0215502	2.44e-05	8.34984	up	138.759	123.521	34.3849	48.7174	28.6962	28.031	5.12925	5.28378	11.9633	13.0656	37.5463	18.1584	7.20949	7.26378	6.6173	7.02022	4.04446	5.07932	3.19897	2.91385	3.16563	3.64731	3.42918	2.50914	Detected	Detected	Detected	Detected	Detected	Detected	Not Detected	Not Detected	Not Detected	Not Detected	Detected	Not Detected	0	A_23_P207868	A_23_P207868	NM_033191	NM_033191	NM_033191	Hs.528700	85280	KRTAP9-4
A_21_P0000138	0.029311	0.0005408	8.02527	up	122.844	24.2285	3.64382	11.2519	126.339	23.3911	2.22008	3.92061	26.2367	2.61641	23.7702	2.79067	7.06372	5.53495	3.45707	4.82504	6.1192	4.82036	1.44171	2.59774	4.31801	1.43326	2.64268	1.35965	Detected	Detected	Not Detected	Detected	Detected	Detected	Not Detected	Not Detected	Detected	Not Detected	Detected	Not Detected	0	A_21_P0000138	A_21_P0000138	NM_001197238	NM_001197238	NM_001197238	Hs.373938	10385	BTN2A2
A_21_P0000089	0.0215502	1.59e-05	8.02493	up	114.479	75.6482	65.2831	40.7135	97.0827	17.0159	6.83142	12.1454	52.1622	2.66612	46.3668	9.72339	6.98078	6.71368	7.53909	6.75569	5.78619	4.35285	3.53118	3.94446	5.37686	1.51901	3.87295	1.85689	Detected	Detected	Detected	Detected	Detected	Detected	Not Detected	Not Detected	Detected	Not Detected	Detected	Not Detected	0	A_21_P0000089	A_21_P0000089	NM_001172660	NM_001172660	NM_001172660	Hs.292056	57732	ZFYVE28
A_24_P160401	0.0225501	6.28e-05	7.97216	up	512.56	116.836	25.7892	36.9509	277.315	352.315	16.0688	13.9215	27.7661	14.1828	131.624	25.3856	8.78027	7.20232	6.1944	6.61663	7.15921	8.31042	4.76149	4.15755	4.40721	3.76774	6.13257	3.06688	Detected	Detected	Detected	Detected	Detected	Detected	Detected	Not Detected	Detected	Detected	Detected	Detected	0	A_24_P160401	A_24_P160401	NM_178181	NM_178181	NM_178181	Hs.476093	64866	CDCP1
A_33_P3368540	0.0215502	1.63e-06	7.97049	up	218.52	276.103	42.626	21.8313	268.528	80.766	11.8849	25.8068	54.2192	4.32379	47.7555	25.6029	7.7515	8.17692	6.92713	5.82933	7.11723	6.46562	4.29231	5.18137	5.43724	2.36566	3.9386	3.08453	Detected	Detected	Detected	Detected	Detected	Detected	Not Detected	Detected	Detected	Not Detected	Detected	Detected	0	A_33_P3368540	A_33_P3368540	ENST00000490889	XR_249341	XR_249341		9901	SRGAP3
A_23_P124927	0.0215502	2.72e-05	7.95099	up	421.566	333.221	52.9277	61.0855	353.538	419.068	22.024	28.4115	82.5587	6.6665	109.208	45.6514	8.54012	8.40231	7.23634	7.33093	7.48609	8.52998	5.27607	5.33732	6.06194	2.83648	5.75446	4.31268	Detected	Detected	Detected	Detected	Detected	Detected	Detected	Detected	Detected	Not Detected	Detected	Detected	0	A_23_P124927	A_23_P124927	NM_006480	NM_006480	NM_006480	Hs.9347	10636	RGS14
A_24_P95439	0.0356256	0.00158983	7.84985	up	557.916	437.384	51.9463	192.207	1201.78	1388.6	19.3219	69.6892	173.823	27.2127	412.458	27.5523	8.88941	8.74405	7.20997	8.87237	9.20656	10.1568	5.06072	6.85552	7.16471	4.86384	8.07544	3.223	Detected	Detected	Detected	Detected	Detected	Detected	Detected	Detected	Detected	Detected	Detected	Detected	0	A_24_P95439	A_24_P95439	NM_001014437	NM_001014437	NM_001014437	Hs.274873	833	CARS
A_23_P141863	0.030849	0.000778717	7.84417	up	621.605	182.94	13.6615	67.086	119.747	244.832	10.8343	19.272	65.0332	8.5013	75.8984	23.4548	9.03282	7.70048	5.29058	7.45712	6.05056	7.84087	4.15135	4.68962	5.70543	3.1002	4.97227	2.92382	Detected	Detected	Detected	Detected	Detected	Detected	Not Detected	Detected	Detected	Not Detected	Detected	Detected	0	A_23_P141863	A_23_P141863	NM_014480	NM_014480	NM_014480	Hs.438994	27300	ZNF544
A_23_P502609	0.0254975	0.000215613	7.82129	up	314.468	144.066	10.1262	37.3053	163.181	68.5396	4.64215	11.9668	44.3019	13.1212	48.1986	15.4326	8.17889	7.43257	4.88374	6.62986	6.45546	6.2603	3.07792	3.92356	5.12697	3.65333	3.9589	2.29569	Detected	Detected	Not Detected	Detected	Detected	Detected	Not Detected	Not Detected	Detected	Not Detected	Detected	Not Detected	0	A_23_P502609	A_23_P502609	NM_004204	NM_004204	NM_004204	Hs.744949	9091	PIGQ
A_33_P3343365	0.0313381	0.000816471	7.80706	up	161.162	266.84	2.4738	13.0887	84.7247	47.1297	4.02451	5.98664	18.9852	5.61847	21.7706	10.9688	7.38247	8.13913	2.697	5.04578	5.60683	5.79193	2.89213	3.04085	3.81117	2.65758	2.52403	1.94871	Detected	Detected	Not Detected	Detected	Detected	Detected	Not Detected	Not Detected	Detected	Not Detected	Detected	Not Detected	0	A_33_P3343365	A_33_P3343365	NM_207491	NM_207491	NM_207491	Hs.654735	401145	CCSER1
A_32_P177539	0.0488627	0.00410808	7.78804	up	579.344	16.6537	8.45869	18.6963	169.706	1174.92	4.50089	20.2245	35.1258	6.50247	65.2121	24.5748	8.94006	5.18586	4.63247	5.59372	6.50839	9.93853	3.04012	4.77012	4.77078	2.81097	4.6339	3.00557	Detected	Not Detected	Not Detected	Detected	Detected	Detected	Not Detected	Detected	Detected	Not Detected	Detected	Detected	0	A_32_P177539	A_32_P177539	NM_024335	NM_024335	NM_024335	Hs.369907	79190	IRX6
A_33_P3590259	0.0265471	0.000300254	7.6848	up	729.401	89.3551	29.5671	34.7996	1026.73	186.929	20.238	32.5762	19.2686	52.3431	38.4679	35.5659	9.23457	6.90044	6.39235	6.52991	8.97418	7.50479	5.13239	5.56677	3.8357	6.1275	3.47562	3.74621	Detected	Detected	Detected	Detected	Detected	Detected	Detected	Detected	Detected	Detected	Detected	Detected	0	A_33_P3590259	A_33_P3590259	NM_004887	NM_004887	NM_004887	Hs.483444	9547	CXCL14
A_24_P230563	0.0254975	0.000204924	7.6524	up	181.21	20.0441	47.7577	8.90942	713.089	124.764	2.58074	18.7705	24.4706	11.245	65.841	26.0445	7.52891	5.35916	7.09214	4.49093	8.46448	6.99775	2.24363	4.64774	4.21203	3.44086	4.65706	3.11657	Detected	Detected	Detected	Not Detected	Detected	Detected	Not Detected	Detected	Detected	Not Detected	Detected	Detected	0	A_24_P230563	A_24_P230563	NM_000417	NM_000417	NM_000417	Hs.231367	3559	IL2RA
A_23_P432360	0.0293226	0.000544242	7.57604	up	296.214	199.495	11.3301	49.7056	303.306	254.112	8.31626	20.7749	51.0955	11.1901	110.038	17.9983	8.10893	7.80699	5.03694	7.05141	7.28434	7.88654	3.78521	4.81755	5.34308	3.43517	5.77024	2.49525	Detected	Detected	Not Detected	Detected	Detected	Detected	Not Detected	Detected	Detected	Not Detected	Detected	Detected	0	A_23_P432360	A_23_P432360	NM_000303	NM_000303	NM_000303	Hs.625732	5373	PMM2
A_24_P172990	0.035678	0.00159861	7.57401	up	608.904	472.398	53.7539	286.8	806.105	1788.03	32.0271	82.0655	170.792	21.4779	290.512	40.5159	9.00523	8.8344	7.26163	9.41018	8.62934	10.5253	5.88627	7.1199	7.13574	4.44092	7.51667	4.04024	Detected	Detected	Detected	Detected	Detected	Detected	Detected	Detected	Detected	Detected	Detected	Detected	0	A_24_P172990	A_24_P172990	NM_001605	NM_001605	NM_001605	Hs.315137	16	AARS
A_23_P39315	0.0495442	0.00425536	7.52167	up	120.971	34.0126	2.70811	3.21197	41.8443	1363.84	3.55967	4.65049	8.46878	7.88785	21.537	17.6562	7.0474	5.87482	2.92006	3.13787	4.6172	10.1301	2.718	2.77779	2.76673	3.01966	2.5093	2.46962	Detected	Detected	Not Detected	Not Detected	Detected	Detected	Not Detected	Not Detected	Not Detected	Not Detected	Detected	Detected	0	A_23_P39315	A_23_P39315	NM_021187	NM_021187	NM_021187	Hs.187393	57834	CYP4F11
A_23_P6546	0.0349735	0.00144863	7.49652	up	521.94	189.112	16.6329	36.2499	307.422	301.845	6.42022	35.9362	100.734	13.9775	74.7024	17.3856	8.80568	7.73862	5.56798	6.58792	7.30307	8.10377	3.45681	5.73352	6.34774	3.74561	4.93687	2.44917	Detected	Detected	Detected	Detected	Detected	Detected	Not Detected	Detected	Detected	Not Detected	Detected	Detected	0	A_23_P6546	A_23_P6546	NM_020461	NM_020461	NM_020461	Hs.336431	85378	TUBGCP6
A_23_P42802	0.0215502	2.77e-05	7.46737	up	199.235	68.1141	74.5646	40.2431	621.089	598.961	10.3816	33.4863	63.506	13.3173	84.6112	46.1017	7.64113	6.60123	7.72792	6.7395	8.27578	9.01276	4.09295	5.61157	5.67075	3.67361	5.2087	4.33713	Detected	Detected	Detected	Detected	Detected	Detected	Not Detected	Detected	Detected	Not Detected	Detected	Detected	0	A_23_P42802	A_23_P42802	NM_004911	NM_004911	NM_004911	Hs.93659	9601	PDIA4
A_23_P4190	0.0378425	0.00195648	7.45365	up	2823.28	1550.2	38.0344	165.778	935.569	172.837	30.9853	68.6953	262.01	17.7859	426.202	25.9323	11.1132	10.3915	6.76168	8.68259	8.83419	7.40631	5.83415	6.83019	7.77501	4.12536	8.12749	3.10961	Detected	Detected	Detected	Detected	Detected	Detected	Detected	Detected	Detected	Not Detected	Detected	Detected	0	A_23_P4190	A_23_P4190	NM_025149	NM_025149	NM_025149	Hs.288959	80221	ACSF2
A_24_P135276	0.0483301	0.00399336	7.44671	up	1039.34	1037.83	44.8639	403.666	776.706	1423.77	42.0244	58.6828	255.634	30.653	548.421	31.9682	9.69693	9.83527	7.00178	9.83259	8.57999	10.1903	6.33037	6.56833	7.73593	5.08508	8.5238	3.51372	Detected	Detected	Detected	Detected	Detected	Detected	Detected	Detected	Detected	Detected	Detected	Detected	0	A_24_P135276	A_24_P135276	NM_032172	NM_032172	NM_032172	Hs.31856	84132	USP42
A_33_P3298567	0.0250229	0.000157075	7.44046	up	279.423	87.3293	5.97917	16.6432	162.853	63.7301	7.64468	8.22784	28.6363	7.32884	27.3766	17.1739	8.03834	6.8738	4.18089	5.41658	6.45286	6.17371	3.67141	3.40875	4.45592	2.93884	2.8565	2.43241	Detected	Detected	Not Detected	Detected	Detected	Detected	Not Detected	Not Detected	Detected	Not Detected	Detected	Not Detected	0	A_33_P3298567	A_33_P3298567	ENST00000533976		AK309421	Hs.377705	55657	ZNF692
A_23_P169437	0.0258313	0.000229095	7.43955	up	36.1803	97.7925	17.8304	2.06065	656.972	156.046	6.73935	8.55005	14.5081	2.66207	83.3571	4.18927	5.65452	6.99881	5.66972	1.98897	8.3587	7.27534	3.51454	3.46255	3.421	1.50891	5.17607	1.4917	Detected	Detected	Not Detected	Not Detected	Detected	Detected	Not Detected	Not Detected	Not Detected	Not Detected	Detected	Not Detected	0	A_23_P169437	A_23_P169437	NM_005564	NM_005564	NM_005564	Hs.204238	3934	LCN2
A_23_P3849	0.0306781	0.000731404	7.39443	up	1097.58	460.775	19.8502	84.722	497.285	383.394	23.1037	46.5294	94.1433	17.4286	151.308	24.2156	9.77507	8.80423	5.82186	7.78681	7.95805	8.41385	5.35384	6.16863	6.25041	4.09187	6.39888	2.97761	Detected	Detected	Detected	Detected	Detected	Detected	Detected	Detected	Detected	Detected	Detected	Detected	0	A_23_P3849	A_23_P3849	NM_016292	NM_016292	NM_016292	Hs.30345	10131	TRAP1
A_21_P0012301	0.0215502	1.82e-05	7.342	up	42.1506	34.9327	7.55559	13.6214	28.3224	56.7042	3.08185	2.73494	6.76359	3.01615	29.2818	10.5735	5.83123	5.90388	4.48141	5.10455	4.02499	6.0291	2.50989	2.18809	2.5565	1.97372	2.97093	1.91899	Detected	Detected	Not Detected	Detected	Detected	Detected	Not Detected	Not Detected	Not Detected	Not Detected	Detected	Not Detected	0	A_21_P0012301	A_21_P0012301	ENST00000433633			Hs.690738
A_23_P1352	0.0314567	0.000863349	7.338	up	1010.95	116.895	7.87439	15.1792	44.1542	2.20477	7.17977	7.39055	4.73652	3.48392	19.6326	10.7807	9.66136	7.20264	4.53425	5.26634	4.69442	1.44704	3.59363	3.27752	2.22852	2.1288	2.39256	1.93272	Detected	Detected	Not Detected	Detected	Detected	Not Detected	Not Detected	Not Detected	Not Detected	Not Detected	Not Detected	Not Detected	0	A_23_P1352	A_23_P1352	NM_003015	NM_003015	NM_003015	Hs.279565	6425	SFRP5
A_33_P3313110	0.0402916	0.00237159	7.29006	up	42.6284	658.349	43.4289	106.701	2367.05	177.322	58.1347	15.5498	24.4022	21.233	58.0652	113.766	5.84344	9.26605	6.95524	8.09061	10.2152	7.43663	6.84511	4.33422	4.2074	4.42054	4.38063	6.42369	Detected	Detected	Detected	Detected	Detected	Detected	Detected	Detected	Detected	Detected	Detected	Detected	0	A_33_P3313110	A_33_P3313110	NM_024690	NM_024690	NM_024690	Hs.432676	94025	MUC16
A_33_P3311145	0.0250229	0.000133546	7.22263	up	83.5283	149.061	25.2381	44.1021	174.121	76.3304	6.20106	12.5632	76.8275	6.17064	70.8367	11.9716	6.63028	7.46986	6.16195	6.87476	6.54469	6.39707	3.41527	3.99486	5.95428	2.75449	4.82142	2.02314	Detected	Detected	Detected	Detected	Detected	Detected	Not Detected	Not Detected	Detected	Not Detected	Detected	Not Detected	0	A_33_P3311145	A_33_P3311145	NM_001271933	NM_001271933	NM_001271933	Hs.504009	22897	CEP164
A_23_P146497	0.0350627	0.00148111	7.16141	up	959.371	915.015	43.9481	218.161	425.442	495.11	28.775	54.117	185.983	19.8239	283.162	32.3901	9.58682	9.67815	6.97221	9.035	7.73646	8.75737	5.71443	6.42579	7.26269	4.30429	7.47888	3.53847	Detected	Detected	Detected	Detected	Detected	Detected	Detected	Detected	Detected	Detected	Detected	Detected	0	A_23_P146497	A_23_P146497	NM_014811	NM_014811	NM_014811	Hs.533260	9858	PPP1R26
A_24_P106953	0.0250229	0.000114869	7.14415	up	99.3296	78.1282	17.6591	13.4	158.244	201.945	8.48875	12.9455	38.5666	5.13356	47.0957	12.5304	6.82618	6.74909	5.65466	5.07834	6.41187	7.5995	3.81318	4.03733	4.91468	2.56008	3.9088	2.065	Detected	Detected	Detected	Detected	Detected	Detected	Not Detected	Detected	Detected	Not Detected	Detected	Not Detected	0	A_24_P106953	A_24_P106953	NM_025072	NM_025072	NM_025072	Hs.495219	80142	PTGES2
A_33_P3862354	0.0250229	9.84e-05	7.07727	up	2736.04	931.806	315.199	769.132	2614.81	1701.32	76.8574	128.326	480.336	74.5052	629.139	81.1106	11.0666	9.70239	9.72824	10.645	10.3699	10.4471	7.27636	7.85457	8.6546	6.83777	8.73904	5.65774	Detected	Detected	Detected	Detected	Detected	Detected	Detected	Detected	Detected	Detected	Detected	Detected	0	A_33_P3862354	A_33_P3862354	NM_025204	NM_025204	NM_025204	Hs.517731	80305	TRABD
A_23_P415652	0.0480324	0.00391238	7.05702	up	751.811	357.705	11.568	103.59	491.453	476.62	11.9002	43.709	104.92	11.3485	235.649	27.2929	9.27221	8.48995	5.06321	8.05331	7.94126	8.70251	4.29413	6.06288	6.4083	3.45444	7.1829	3.20545	Detected	Detected	Not Detected	Detected	Detected	Detected	Not Detected	Detected	Detected	Not Detected	Detected	Detected	0	A_23_P415652	A_23_P415652	NM_024642	NM_024642	NM_024642	Hs.47099	79695	GALNT12
A_33_P3854217	0.0400959	0.00233334	7.05343	up	366.424	300.771	6.31253	26.3344	348.945	169.759	6.32998	26.9027	68.2993	8.22026	94.4986	11.3316	8.36816	8.27956	4.25025	6.1157	7.46912	7.38222	3.44256	5.24723	5.77671	3.06525	5.44844	1.97485	Detected	Detected	Not Detected	Detected	Detected	Detected	Not Detected	Detected	Detected	Not Detected	Detected	Not Detected	0	A_33_P3854217	A_33_P3854217	NM_024874	NM_024874	NM_024874	Hs.456507	79932	KIAA0319L
A_24_P48248	0.021928	4.54e-05	7.02396	up	101.852	64.0603	45.6487	64.1252	87.6174	348.705	10.0344	22.4297	45.7616	12.0341	44.0486	30.7248	6.85252	6.53914	7.02892	7.39794	5.64979	8.29851	4.04587	4.94523	5.17707	3.53538	3.75832	3.43124	Detected	Detected	Detected	Detected	Detected	Detected	Not Detected	Detected	Detected	Not Detected	Detected	Detected	0	A_24_P48248	A_24_P48248	NM_024032	NM_024032	NM_024032	Hs.437059	78995	C17orf53
A_33_P3510335	0.0400959	0.00233831	6.96574	up	13077.7	6121.44	134.594	581.115	4541.97	7270.39	81.32	418.776	682.18	167.363	1150.07	177.972	13.3257	12.2814	8.56426	10.2917	11.2114	12.6513	7.36207	9.66561	9.17827	8.31838	9.67056	7.3292	Detected	Detected	Detected	Detected	Detected	Detected	Detected	Detected	Detected	Detected	Detected	Detected	0	A_33_P3510335	A_33_P3510335	NM_213655	NM_213655	NM_213655	Hs.744906	65125	WNK1
A_33_P3372389	0.0303168	0.000685956	6.8934	up	252.957	341.256	9.27245	30.8348	302.19	295.911	9.752	18.272	46.4336	9.15176	124.583	25.7411	7.92243	8.43212	4.76068	6.35618	7.2777	8.0745	4.00818	4.60435	5.19861	3.18391	6.02262	3.09464	Detected	Detected	Not Detected	Detected	Detected	Detected	Not Detected	Detected	Detected	Not Detected	Detected	Detected	0	A_33_P3372389	A_33_P3372389	NM_015102	NM_015102	NM_015102	Hs.462348	261734	NPHP4
A_33_P3484775	0.0294201	0.000584982	6.84054	up	144.435	199.181	12.4208	58.8727	67.9679	85.9589	16.9012	3.47962	33.9735	8.45128	63.3257	24.4305	7.25788	7.80477	5.15711	7.28112	5.30826	6.53547	4.85024	2.47131	4.72105	3.09395	4.56891	2.99449	Detected	Detected	Detected	Detected	Detected	Detected	Detected	Not Detected	Detected	Not Detected	Detected	Detected	0	A_33_P3484775	A_33_P3484775
A_23_P53557	0.0254975	0.000203797	6.81686	up	100.096	66.0285	18.9464	29.583	92.7822	302.214	9.71858	17.7317	38.1364	11.0108	38.1051	16.0575	6.83466	6.56936	5.7562	6.29025	5.72689	8.10513	4.00351	4.55165	4.89798	3.41222	3.45716	2.34534	Detected	Detected	Detected	Detected	Detected	Detected	Not Detected	Detected	Detected	Not Detected	Detected	Not Detected	0	A_23_P53557	A_23_P53557	NM_002342	NM_002342	NM_002342	Hs.1116	4055	LTBR
A_33_P3277753	0.0265471	0.0002919	6.75506	up	136.563	50.481	4.2685	15.8989	99.5669	49.5358	4.46507	3.1331	22.7407	10.8408	23.5427	13.791	7.18779	6.28396	3.72234	5.33892	5.81718	5.8571	3.03099	2.35533	4.09905	3.39267	2.63004	2.16339	Detected	Detected	Not Detected	Detected	Detected	Detected	Not Detected	Not Detected	Detected	Not Detected	Detected	Not Detected	0	A_33_P3277753	A_33_P3277753	NM_144994	NM_144994	NM_144994	Hs.643430	200539	ANKRD23
A_33_P3422479	0.0377051	0.00192998	6.7477	up	518.969	282.114	5.62339	54.9728	149.972	144.553	6.0701	29.4551	48.7809	12.3272	71.1906	22.0991	8.7988	8.20298	4.10106	7.19068	6.33946	7.1816	3.39069	5.39813	5.27576	3.56746	4.83321	2.82296	Detected	Detected	Not Detected	Detected	Detected	Detected	Not Detected	Detected	Detected	Not Detected	Detected	Detected	0	A_33_P3422479	A_33_P3422479	NM_001031717	NM_001031717	NM_001031717	Hs.9383	78987	CRELD1
A_24_P87458	0.0234302	7.47e-05	6.74145	up	363.366	234.495	35.8273	36.7056	151.052	311.034	14.4929	25.018	83.8681	11.3796	63.8488	35.6444	8.3569	7.98803	6.67582	6.60588	6.35063	8.14391	4.59519	5.12721	6.08428	3.45849	4.58567	3.75197	Detected	Detected	Detected	Detected	Detected	Detected	Detected	Detected	Detected	Not Detected	Detected	Detected	0	A_24_P87458	A_24_P87458	NM_001080542	NM_001080542	NM_001080542	Hs.720068	85302	FBF1
A_24_P292964	0.0444903	0.00318889	6.6809	up	1338.63	208.431	15.6363	42.0543	1066.36	456.67	13.4384	47.9582	141.06	10.024	200.887	34.445	10.0456	7.85303	5.47976	6.80606	9.03965	8.64656	4.48018	6.2214	6.85182	3.29419	6.91058	3.67221	Detected	Detected	Detected	Detected	Detected	Detected	Detected	Detected	Detected	Not Detected	Detected	Detected	0	A_24_P292964	A_24_P292964	NM_001278198	NM_001278198	NM_001278198	Hs.20157	80279	CDK5RAP3
A_21_P0014055	0.0282819	0.00039925	6.63618	up	268.444	62.8808	10.2879	15.4152	79.3283	148.292	4.37761	15.1117	32.3067	7.5661	40.8876	18.444	7.98898	6.51818	4.90513	5.29037	5.52024	7.21376	3.00832	4.2894	4.64521	2.97449	3.6025	2.53463	Detected	Detected	Not Detected	Detected	Detected	Detected	Not Detected	Detected	Detected	Not Detected	Detected	Detected	0	A_21_P0014055	A_21_P0014055	NM_001288814	NM_001288814	NM_001288814	Hs.443139	727957	MROH1
A_24_P8109	0.0284338	0.000433999	6.60263	up	527.415	389.882	21.5953	52.2796	285.872	969.936	22.7124	27.8652	95.2733	16.5787	93.0379	53.46	8.8189	8.60519	5.93885	7.12189	7.19992	9.67056	5.32644	5.30638	6.26949	4.00941	5.41446	4.69089	Detected	Detected	Detected	Detected	Detected	Detected	Detected	Detected	Detected	Not Detected	Detected	Detected	0	A_24_P8109	A_24_P8109	NM_001012302	NM_001012302	NM_001012302	Hs.501622	338440	ANO9
A_33_P3370244	0.0265471	0.000302637	6.58098	up	87.5705	162.446	19.6893	41.9069	40.7159	153.082	23.4871	6.74997	33.7623	7.11463	37.9149	21.3086	6.68271	7.56728	5.80903	6.80101	4.57258	7.25303	5.38016	3.17296	4.71103	2.90587	3.44683	2.75898	Detected	Detected	Detected	Detected	Detected	Detected	Detected	Not Detected	Detected	Not Detected	Detected	Detected	0	A_33_P3370244	A_33_P3370244	NM_001145011	NM_001145011	NM_001145011	Hs.684212	342346	C16orf96
A_23_P144549	0.0335671	0.00120839	6.55627	up	35.085	7.33188	3.32709	155.272	51.0214	177.386	3.75995	5.97269	12.6919	7.55076	34.8666	20.4041	5.61958	4.45303	3.29586	8.59302	4.90067	7.43726	2.79492	3.03817	3.24282	2.97133	3.29001	2.68492	Detected	Not Detected	Not Detected	Detected	Detected	Detected	Not Detected	Not Detected	Not Detected	Not Detected	Detected	Detected	0	A_23_P144549	A_23_P144549	NM_004967	NM_004967	NM_004967	Hs.518726	3381	IBSP
A_33_P3345001	0.0215502	2.37e-05	6.55611	up	45.292	37.4197	7.54531	7.27393	79.5268	55.7183	4.16084	3.08338	14.7175	3.23017	32.4467	10.5101	5.91464	5.97486	4.48011	4.21524	5.52356	6.00759	2.93826	2.33533	3.44143	2.05069	3.15865	1.91461	Detected	Detected	Not Detected	Not Detected	Detected	Detected	Not Detected	Not Detected	Not Detected	Not Detected	Detected	Not Detected	0	A_33_P3345001	A_33_P3345001	ENST00000441217	XM_005264187
A_24_P117672	0.0250229	0.000131157	6.55595	up	212.194	308.696	52.4617	94.7873	226.522	267.386	23.9162	36.6404	89.8283	23.7162	81.4296	19.8287	7.71737	8.30793	7.2236	7.93475	6.89695	7.9482	5.41429	5.76585	6.18616	4.61616	5.12913	2.64039	Detected	Detected	Detected	Detected	Detected	Detected	Detected	Detected	Detected	Detected	Detected	Detected	0	A_24_P117672	A_24_P117672	NM_021228	NM_021228	NM_021228	Hs.103521	58506	SCAF1
A_23_P41009	0.0215502	1.6e-05	6.55595	up	71.7024	72.1514	23.6429	20.039	178.662	73.407	8.34937	13.8126	43.0095	3.99924	47.0845	15.8961	6.45279	6.66378	6.06979	5.70091	6.57899	6.3469	3.7898	4.14261	5.08075	2.28241	3.90798	2.33279	Detected	Detected	Detected	Detected	Detected	Detected	Not Detected	Detected	Detected	Not Detected	Detected	Not Detected	0	A_23_P41009	A_23_P41009	NM_015926	NM_015926	NM_015926	Hs.517864	51368	TEX264
A_24_P40978	0.02321	6.96e-05	6.49228	up	159.808	95.1856	42.6963	33.14	89.305	138.218	6.61976	27.2887	80.2035	7.5284	41.177	24.1479	7.37163	6.97139	6.92983	6.46542	5.67517	7.12754	3.4958	5.27128	6.02214	2.96746	3.61815	2.97379	Detected	Detected	Detected	Detected	Detected	Detected	Not Detected	Detected	Detected	Not Detected	Detected	Detected	0	A_24_P40978	A_24_P40978	NM_138496	NM_138496	NM_138496	Hs.459379	50626	CYHR1
A_33_P3876591	0.0215502	1.29e-05	6.49019	up	121.208	134.314	28.48	40.5496	77.1039	51.6456	11.6572	11.8427	32.254	9.75527	52.6745	17.6263	7.0495	7.3564	6.34122	6.75168	5.47937	5.91029	4.26159	3.90675	4.64205	3.25833	4.1631	2.46709	Detected	Detected	Detected	Detected	Detected	Detected	Not Detected	Detected	Detected	Not Detected	Detected	Detected	0	A_33_P3876591	A_33_P3876591	CD050382		CD050382	Hs.405444	677842	SNORA76C
A_23_P887	0.0250229	0.000147281	6.48643	up	67.048	33.0388	13.491	4.14703	142.464	194.591	5.68509	5.28488	24.5797	4.88997	32.0353	18.6289	6.37354	5.8463	5.2741	3.50978	6.27027	7.5502	3.31663	2.91407	4.21939	2.50471	3.13569	2.54914	Detected	Detected	Detected	Not Detected	Detected	Detected	Not Detected	Not Detected	Detected	Not Detected	Detected	Detected	0	A_23_P887	A_23_P887	NM_014002	NM_014002	NM_014002	Hs.321045	9641	IKBKE
A_23_P152262	0.0215502	1.34e-05	6.46763	up	89.1071	62.6841	8.84765	27.8827	172.763	27.6892	5.69917	8.5437	19.3746	6.99596	36.2395	20.1021	6.70165	6.51327	4.69254	6.19935	6.53336	5.05932	3.31898	3.46165	3.84486	2.88807	3.36358	2.66293	Detected	Detected	Not Detected	Detected	Detected	Detected	Not Detected	Not Detected	Detected	Not Detected	Detected	Detected	0	A_23_P152262	A_23_P152262	NM_004413	NM_004413	NM_004413	Hs.109	1800	DPEP1
A_33_P3292531	0.0265471	0.00030351	6.46076	up	17.843	65.5348	3.87434	2.07466	28.0052	49.9012	2.47434	2.22734	3.06261	2.8766	5.81628	3.12431	4.80953	6.56207	3.56105	2.06806	4.00958	5.86743	2.11624	1.91873	1.82676	1.88613	1.55716	1.42248	Detected	Detected	Not Detected	Not Detected	Detected	Detected	Not Detected	Not Detected	Not Detected	Not Detected	Not Detected	Not Detected	0	A_33_P3292531	A_33_P3292531	NM_001130924	NM_001130924	NM_001130924	Hs.632365	199953	TMEM201
A_23_P161125	0.0414312	0.00252578	6.43406	up	793.225	665.477	62.5492	248.383	1042.36	823.791	35.0742	76.2147	327.305	20.4922	467.903	37.714	9.33748	9.27919	7.4793	9.20432	9.00255	9.44684	6.03522	6.99752	8.09854	4.35986	8.26951	3.87466	Detected	Detected	Detected	Detected	Detected	Detected	Detected	Detected	Detected	Detected	Detected	Detected	0	A_23_P161125	A_23_P161125	NM_020963	NM_020963	NM_020963	Hs.514941	4343	MOV10
A_23_P103226	0.02738	0.00035791	6.43131	up	57.4756	64.9107	3.70224	6.60837	21.8123	39.0861	3.07345	2.47591	16.5609	2.81172	11.0908	4.85334	6.19113	6.55188	3.48353	4.09187	3.64521	5.53901	2.50616	2.06789	3.61044	1.81105	1.85654	1.53988	Detected	Detected	Not Detected	Not Detected	Detected	Detected	Not Detected	Not Detected	Detected	Not Detected	Not Detected	Not Detected	0	A_23_P103226	A_23_P103226	NM_001441	NM_001441	NM_001441	Hs.720143	2166	FAAH
A_24_P113264	0.0250229	0.000123648	6.41449	up	39.7655	37.0174	7.6531	11.9837	22.7382	114.569	2.89102	7.94497	15.3821	5.07217	14.3342	8.32534	5.76135	5.96405	4.49801	4.91645	3.70561	6.89237	2.41742	3.36716	3.5056	2.54528	2.04993	1.76444	Detected	Detected	Not Detected	Detected	Detected	Detected	Not Detected	Not Detected	Not Detected	Not Detected	Not Detected	Not Detected	0	A_24_P113264	A_24_P113264	ENST00000509137	XM_006723017	XM_006723017	Hs.187461	126433	FBXO27
A_23_P83818	0.0348993	0.00143486	6.38143	up	257.914	83.6262	30.3965	94.8395	848.452	89.7276	3.9541	66.4152	57.0103	17.2016	258.294	9.40043	7.94386	6.82688	6.43593	7.93539	8.70116	6.58777	2.87	6.77172	5.51198	4.06958	7.32888	1.83555	Detected	Detected	Detected	Detected	Detected	Detected	Not Detected	Detected	Detected	Detected	Detected	Not Detected	0	A_23_P83818	A_23_P83818	NM_000093	NM_000093	NM_000093	Hs.210283	1289	COL5A1
A_33_P3394868	0.02321	7.03e-05	6.37717	up	155.484	159.292	13.2972	20.862	55.324	54.1356	8.13705	7.92701	33.1816	5.08016	32.8952	28.9848	7.34188	7.54589	5.2545	5.76106	5.01746	5.97089	3.7555	3.36403	4.68609	2.54705	3.18203	3.31949	Detected	Detected	Not Detected	Detected	Detected	Detected	Not Detected	Not Detected	Detected	Not Detected	Detected	Detected	0	A_33_P3394868	A_33_P3394868	NM_001163724	NM_001163724	NM_001163724	Hs.22047	388588	SMIM1
A_33_P3390539	0.0298354	0.000626817	6.36561	up	272.135	134.935	12.0273	17.355	195.561	405.267	9.72827	20.4187	40.2276	12.8356	69.0761	24.0372	8.00624	7.36233	5.11475	5.48052	6.70108	8.48727	4.00449	4.78689	4.98167	3.62371	4.76699	2.96664	Detected	Detected	Not Detected	Detected	Detected	Detected	Not Detected	Detected	Detected	Not Detected	Detected	Detected	0	A_33_P3390539	A_33_P3390539	NM_152312	NM_152312	NM_152312	Hs.86543	120071	GYLTL1B
A_24_P173746	0.0234653	7.58e-05	6.36547	up	33.0601	30.8969	17.5006	14.125	277.766	75.2019	3.1811	14.1677	26.1488	9.42199	18.4369	25.2091	5.54848	5.78162	5.64077	5.15818	7.1611	6.37908	2.55274	4.18597	4.31297	3.22008	2.3223	3.05356	Detected	Detected	Detected	Detected	Detected	Detected	Not Detected	Detected	Detected	Not Detected	Not Detected	Detected	0	A_24_P173746	A_24_P173746	NM_152663	NM_152663	NM_152663	Hs.632485	55103	RALGPS2
A_33_P3393245	0.0372676	0.00185362	6.35114	up	8152.25	5022.71	441.897	1040.31	3459	4948.02	206.375	328.925	1795.34	63.9223	1800.71	151.874	12.58	11.9863	10.1535	11.0216	10.7785	12.0502	8.74634	9.30331	10.5922	6.52927	10.3745	7.02238	Detected	Detected	Detected	Detected	Detected	Detected	Detected	Detected	Detected	Detected	Detected	Detected	0	A_33_P3393245	A_33_P3393245	NM_015050	NM_015050	NM_015050	Hs.520102	23070	CMTR1
A_24_P262321	0.0262664	0.000274311	6.34397	up	330.093	354.764	9.48479	37.5087	469.596	195.809	15.5522	32.3016	42.5996	18.583	81.3215	23.5596	8.23322	8.48069	4.79193	6.63749	7.87659	7.55824	4.71197	5.5525	5.06564	4.19741	5.12662	2.9317	Detected	Detected	Not Detected	Detected	Detected	Detected	Detected	Detected	Detected	Detected	Detected	Detected	0	A_24_P262321	A_24_P262321	NM_001204478	NM_001204478	NM_001204478	Hs.164595	100533496	TVP23C-CDRT4
A_24_P401174	0.0409308	0.00246913	6.34062	up	132.556	186.338	6.53162	29.5338	221.554	99.8579	18.0054	8.5661	58.1224	2.79047	93.1303	10.4658	7.15427	7.72136	4.29465	6.28676	6.86896	6.72152	4.95009	3.46469	5.54258	1.77431	5.41665	1.91147	Detected	Detected	Not Detected	Detected	Detected	Detected	Detected	Not Detected	Detected	Not Detected	Detected	Not Detected	0	A_24_P401174	A_24_P401174	NM_015202	NM_015202	NM_015202	Hs.460459	23247	KIAA0556
A_32_P140706	0.0301209	0.000662192	6.3299	up	4240.1	2466.53	125.743	676.77	1690.94	2511.63	86.1861	211.089	496.321	67.258	540.134	121.821	11.693	11.0403	8.47079	10.4853	9.70939	11.0457	7.45393	8.61987	8.70155	6.62745	8.49692	6.57169	Detected	Detected	Detected	Detected	Detected	Detected	Detected	Detected	Detected	Detected	Detected	Detected	0	A_32_P140706	A_32_P140706	NM_000535	NM_000535	NM_000535	Hs.632637	5395	PMS2
A_23_P14559	0.0310083	0.000788199	6.29812	up	550.65	451.781	18.782	45.2291	285.91	352.098	14.9507	25.7046	87.1217	11.4564	143.233	42.7032	8.87469	8.77777	5.74383	6.9109	7.19999	8.30917	4.64452	5.17428	6.14287	3.46691	6.29878	4.15946	Detected	Detected	Detected	Detected	Detected	Detected	Detected	Detected	Detected	Not Detected	Detected	Detected	0	A_23_P14559	A_23_P14559	NM_006871	NM_006871	NM_006871	Hs.268551	11035	RIPK3
A_33_P3267822	0.0250229	0.000118855	6.2861	up	195.448	124.075	41.508	55.7297	262.79	497.036	15.0703	32.2993	66.4481	9.94399	99.0461	42.3141	7.62003	7.26899	6.8885	7.20895	7.08775	8.76356	4.65878	5.55226	5.73704	3.28464	5.55226	4.13982	Detected	Detected	Detected	Detected	Detected	Detected	Detected	Detected	Detected	Not Detected	Detected	Detected	0	A_33_P3267822	A_33_P3267822	NM_001122731	NM_001122731	NM_001122731	Hs.528024	57553	MICAL3
A_33_P3297930	0.0215502	2.8e-05	6.25498	up	38.2963	24.0913	18.6836	31.7423	69.5684	9.40492	5.7545	4.81661	12.3869	4.31635	12.7641	20.7796	5.71743	5.52984	5.73645	6.39963	5.34034	3.53637	3.32875	2.81577	3.21189	2.36401	1.95334	2.71627	Detected	Detected	Detected	Detected	Detected	Not Detected	Not Detected	Not Detected	Not Detected	Not Detected	Not Detected	Detected	0	A_33_P3297930	A_33_P3297930	NM_005202	NM_005202	NM_005202	Hs.353001	1296	COL8A2
A_23_P38618	0.0452412	0.00332223	6.22182	up	166.641	115.91	2.87215	5.32995	173.164	125.9	2.44642	9.69809	26.4067	5.54043	52.2502	16.7472	7.4244	7.19359	3.03201	3.82997	6.53602	7.01112	2.0655	3.61938	4.32989	2.64161	4.14376	2.40295	Detected	Detected	Not Detected	Not Detected	Detected	Detected	Not Detected	Not Detected	Detected	Not Detected	Detected	Detected	0	A_23_P38618	A_23_P38618	NM_004278	NM_004278	NM_004278	Hs.499793	9487	PIGL
A_23_P20894	0.0371347	0.0018411	6.19486	up	135.469	156.357	12.9599	21.3439	450.942	149.868	10.4243	26.2306	99.495	2.88354	105.556	8.27418	7.17736	7.52682	5.21936	5.79392	7.81743	7.22625	4.09935	5.20703	6.33044	1.89263	5.68303	1.76225	Detected	Detected	Detected	Detected	Detected	Detected	Not Detected	Detected	Detected	Not Detected	Detected	Not Detected	0	A_23_P20894	A_23_P20894	NM_024757	NM_024757	NM_024757	Hs.495511	79813	EHMT1
A_23_P168551	0.0313381	0.000815487	6.18983	up	43.3867	100.27	10.7354	45.365	40.8251	179.019	18.0205	3.46418	29.2131	5.58806	34.5947	27.037	5.86294	7.02825	4.96479	6.9155	4.57714	7.44816	4.95124	2.46612	4.48635	2.65181	3.27549	3.18637	Detected	Detected	Not Detected	Detected	Detected	Detected	Detected	Not Detected	Detected	Not Detected	Not Detected	Detected	0	A_23_P168551	A_23_P168551	NM_001040661	NM_001040661	NM_001040661	Hs.4302	222962	SLC29A4
A_33_P3306159	0.0223734	5.5e-05	6.14714	up	382.83	236.2	48.9311	125.13	271.486	135.421	21.1029	30.1577	99.7949	16.3441	88.3429	41.3698	8.42078	7.99762	7.12538	8.29728	7.13275	7.10254	5.20373	5.43868	6.33593	3.98688	5.30338	4.08827	Detected	Detected	Detected	Detected	Detected	Detected	Detected	Detected	Detected	Not Detected	Detected	Detected	0	A_33_P3306159	A_33_P3306159	NM_001080495	NM_001080495	NM_001080495	Hs.520638	84629	TNRC18
A_24_P100234	0.0460897	0.00348651	6.13664	up	180.582	106.02	4.14537	10.4302	85.2455	179.58	2.71571	23.8256	35.0623	4.5215	45.6892	11.1248	7.52506	7.0902	3.67557	4.71377	5.6141	7.4523	2.33329	5.04837	4.76762	2.41712	3.84055	1.95937	Detected	Detected	Not Detected	Not Detected	Detected	Detected	Not Detected	Detected	Detected	Not Detected	Detected	Not Detected	0	A_24_P100234	A_24_P100234	NM_014941	NM_014941	NM_014941	Hs.555918	22880	MORC2
A_33_P3238323	0.0258475	0.000259334	6.13299	up	383.058	551.642	52.8148	52.6478	181.842	303.474	18.958	45.7383	126.938	15.4535	104.044	30.4741	8.42152	9.02933	7.23359	7.13128	6.60436	8.11047	5.02999	6.14085	6.69491	3.89688	5.65227	3.41612	Detected	Detected	Detected	Detected	Detected	Detected	Detected	Detected	Detected	Not Detected	Detected	Detected	0	A_33_P3238323	A_33_P3238323	NM_031229	NM_031229	NM_031229	Hs.247280	10616	RBCK1
A_23_P113789	0.0314567	0.000862402	6.12803	up	116.79	113.418	5.88844	12.04	119.674	139.614	6.64571	23.7178	33.0301	3.67181	40.5348	8.34979	7.00646	7.16739	4.16121	4.92478	6.04961	7.13966	3.49945	5.041	4.67951	2.18629	3.58406	1.76627	Detected	Detected	Not Detected	Detected	Detected	Detected	Not Detected	Detected	Detected	Not Detected	Detected	Not Detected	0	A_23_P113789	A_23_P113789	NM_006677	NM_006677	NM_006677	Hs.255596	10869	USP19
A_23_P303548	0.033506	0.00117827	6.11587	up	284.907	138.909	8.45941	37.5001	429.787	85.0638	8.80342	36.1541	56.0637	4.30859	93.8324	17.2415	8.06335	7.39398	4.6326	6.63707	7.75124	6.52317	3.86463	5.74368	5.48485	2.36213	5.43249	2.43827	Detected	Detected	Not Detected	Detected	Detected	Detected	Not Detected	Detected	Detected	Not Detected	Detected	Detected	0	A_23_P303548	A_23_P303548	NM_001256798	NM_001256798	NM_001256798	Hs.516978	140688	NOL4L
A_24_P332926	0.037268	0.00185481	6.10439	up	487.941	191.487	12.5044	29.9649	480.34	265.94	13.1068	24.5158	90.2812	11.3889	138.582	20.7889	8.7236	7.75274	5.16686	6.30989	7.91069	7.94023	4.44227	5.09669	6.19412	3.4597	6.23508	2.71706	Detected	Detected	Not Detected	Detected	Detected	Detected	Detected	Detected	Detected	Not Detected	Detected	Detected	0	A_24_P332926	A_24_P332926	NM_014884	NM_014884	NM_014884	Hs.515271	10147	SUGP2
A_33_P3263317	0.021928	4.62e-05	6.09977	up	394.364	52.9626	68.5748	33.0322	1559.76	104.897	25.0889	19.1198	63.4824	16.8698	70.0093	58.6898	8.45596	6.33347	7.60841	6.46011	9.58554	6.78421	5.49282	4.67623	5.66991	4.03831	4.7962	4.9017	Detected	Detected	Detected	Detected	Detected	Detected	Detected	Detected	Detected	Not Detected	Detected	Detected	0	A_33_P3263317	A_33_P3263317	AK128421		AK128421	Hs.510635
A_33_P3254751	0.0291273	0.00052802	6.08909	up	128.571	150.74	10.8432	50.1465	40.0324	15.7539	3.73923	5.44238	29.7329	11.1844	34.1839	22.604	7.11857	7.48339	4.97813	7.06356	4.54614	4.24186	2.7844	2.94406	4.51464	3.43446	3.25534	2.86138	Detected	Detected	Not Detected	Detected	Detected	Detected	Not Detected	Not Detected	Detected	Not Detected	Detected	Not Detected	0	A_33_P3254751	A_33_P3254751	ENST00000483353		AK124217	Hs.660782	30815	ST6GALNAC6
A_33_P3303212	0.0319114	0.000946279	6.08531	up	60.3394	181.34	7.46036	21.3743	86.656	200.631	34.4853	9.66893	18.5161	11.044	25.0807	15.1081	6.24889	7.69141	4.46713	5.79621	5.63503	7.58959	6.00244	3.61513	3.77366	3.41634	2.71789	2.27081	Detected	Detected	Not Detected	Detected	Detected	Detected	Detected	Not Detected	Detected	Not Detected	Detected	Not Detected	0	A_33_P3303212	A_33_P3303212	NM_001258304	NM_001258304	NM_001258304	Hs.351461	90557	CCDC74A
A_24_P382489	0.0393029	0.00221647	6.04478	up	732.449	2172.02	14.4094	167.137	630.422	869.561	34.5586	74.645	134.016	37.9417	170.365	50.9109	9.23976	10.8681	5.36438	8.6954	8.30074	9.52577	6.00637	6.95891	6.77717	5.48989	6.61481	4.57291	Detected	Detected	Not Detected	Detected	Detected	Detected	Detected	Detected	Detected	Detected	Detected	Detected	0	A_24_P382489	A_24_P382489	ENST00000594962	XM_006722749	XM_006722749	Hs.363138	376497	SLC27A1
A_33_P3277752	0.033506	0.00117156	6.03022	up	25.1908	47.1466	3.88815	15.7363	37.4804	70.5025	11.1646	2.88002	22.115	2.70867	12.4904	3.8824	5.22787	6.21078	3.56735	5.32313	4.44754	6.29467	4.19622	2.25269	4.05451	1.60545	1.93858	1.47062	Detected	Detected	Not Detected	Not Detected	Detected	Detected	Not Detected	Not Detected	Detected	Not Detected	Not Detected	Not Detected	0	A_33_P3277752	A_33_P3277752	NM_144994	NM_144994	NM_144994	Hs.643430	200539	ANKRD23
A_24_P202319	0.021755	3.53e-05	6.028	up	181.138	110.019	47.4729	21.8684	1229.07	52.544	14.8431	25.1812	105.542	3.62262	138.01	19.4733	7.52789	7.13215	7.08411	5.83179	9.23795	5.93192	4.6324	5.13787	6.41666	2.1703	6.22712	2.61138	Detected	Detected	Detected	Detected	Detected	Detected	Detected	Detected	Detected	Not Detected	Detected	Detected	0	A_24_P202319	A_24_P202319	NM_174958	NM_174958	NM_174958	Hs.513870	489	ATP2A3
A_33_P3209885	0.0349767	0.00146736	6.00967	up	1576.16	946.146	63.0735	270.288	974.356	885.331	28.2689	107.261	283.058	46.9393	382.468	53.8479	10.2666	9.72075	7.49367	9.31889	8.8926	9.5468	5.68729	7.5736	7.88614	5.9067	7.95469	4.70714	Detected	Detected	Detected	Detected	Detected	Detected	Detected	Detected	Detected	Detected	Detected	Detected	0	A_33_P3209885	A_33_P3209885	NM_020405	NM_020405	NM_020405	Hs.125036	57125	PLXDC1
A_23_P421011	0.0301227	0.000669238	5.98303	up	48.5197	90.6677	2.49049	31.0974	54.1875	46.5231	3.72575	10.5831	15.9121	3.25104	27.9128	15.0481	5.99428	6.91638	2.72942	6.36933	4.98755	5.77671	2.77936	3.74228	3.55422	2.05749	2.88942	2.26564	Detected	Detected	Not Detected	Detected	Detected	Detected	Not Detected	Not Detected	Detected	Not Detected	Detected	Not Detected	0	A_23_P421011	A_23_P421011	NM_030929	NM_030929	NM_030929	Hs.632079	81621	KAZALD1
A_23_P64611	0.021928	4.28e-05	5.97533	up	145.798	19.7724	10.587	8.61373	97.2097	62.2956	8.84508	4.15064	25.0067	3.52659	37.0906	13.5259	7.27027	5.34701	4.94593	4.44581	5.78832	6.14606	3.87086	2.65963	4.24593	2.14124	3.40808	2.14357	Detected	Detected	Not Detected	Not Detected	Detected	Detected	Not Detected	Not Detected	Detected	Not Detected	Detected	Not Detected	0	A_23_P64611	A_23_P64611	NM_176798	NM_176798	NM_176798	Hs.16362	5031	P2RY6
A_23_P166491	0.0286923	0.000476497	5.97225	up	147.777	96.5123	22.5106	11.3376	262.997	104.215	6.20772	16.3597	66.0218	11.6077	67.7055	7.75086	7.28603	6.98438	5.99645	4.83521	7.0889	6.77488	3.41715	4.4187	5.72723	3.48432	4.72333	1.72549	Detected	Detected	Detected	Not Detected	Detected	Detected	Not Detected	Detected	Detected	Not Detected	Detected	Not Detected	0	A_23_P166491	A_23_P166491	NM_015705	NM_015705	NM_015705	Hs.474914	27352	SGSM3
A_24_P264943	0.0314567	0.00085772	5.94975	up	282.052	480.727	23.8574	49.5419	453.829	2586.56	64.4144	27.8763	58.6113	26.7855	95.9796	70.5676	8.0514	8.8581	6.08297	7.04545	7.82812	11.082	7.0019	5.30706	5.55294	4.83558	5.48073	5.33282	Detected	Detected	Detected	Detected	Detected	Detected	Detected	Detected	Detected	Detected	Detected	Detected	0	A_24_P264943	A_24_P264943	NM_000095	NM_000095	NM_000095	Hs.1584	1311	COMP
A_23_P153767	0.042458	0.00273325	5.93931	up	1239.4	363.561	13.7418	32.9597	346.6	466.817	15.8611	45.279	93.4198	15.3576	132.402	36.221	9.94243	8.5147	5.29863	6.45666	7.45805	8.67483	4.74051	6.12306	6.24082	3.88461	6.14355	3.79097	Detected	Detected	Detected	Detected	Detected	Detected	Detected	Detected	Detected	Not Detected	Detected	Detected	0	A_23_P153767	A_23_P153767	NM_014371	NM_014371	NM_014371	Hs.399800	26993	AKAP8L
A_21_P0011085	0.0389172	0.00212282	5.93573	up	107.207	25.9815	6.48068	23.2538	338.957	480.839	9.00902	16.9462	33.726	5.68731	78.8673	19.8524	6.90993	5.60707	4.28479	5.9218	7.42994	8.71444	3.89431	4.47572	4.70926	2.67108	5.05857	2.64247	Detected	Detected	Not Detected	Detected	Detected	Detected	Not Detected	Detected	Detected	Not Detected	Detected	Detected	0	A_21_P0011085	A_21_P0011085	ENST00000540982	XR_424315	XR_424315	Hs.568152
A_23_P304489	0.0254975	0.000196244	5.92558	up	14.8135	6.7176	10.4223	15.0764	130.815	16.6374	2.4846	16.8169	2.83889	2.7828	15.1392	12.978	4.58814	4.37343	4.9235	5.25459	6.1629	4.3199	2.1334	4.46216	1.66309	1.75969	2.10178	2.1006	Detected	Not Detected	Not Detected	Detected	Detected	Detected	Not Detected	Detected	Not Detected	Not Detected	Not Detected	Not Detected	0	A_23_P304489	A_23_P304489	NM_015381	NM_015381	NM_015381	Hs.436854	25817	FAM19A5
A_24_P413920	0.0384748	0.00205716	5.90591	up	32.3399	266.803	2.97135	12.1155	30.6991	339.833	5.97961	16.7816	20.7882	2.8081	21.2725	19.9585	5.52127	8.13833	3.09553	4.93311	4.14725	8.26656	3.37273	4.45809	3.95171	1.80307	2.49355	2.64996	Detected	Detected	Not Detected	Detected	Detected	Detected	Not Detected	Detected	Detected	Not Detected	Not Detected	Detected	0	A_24_P413920	A_24_P413920	NM_145175	NM_145175	NM_145175	Hs.260855	151354	FAM84A
A_33_P3248610	0.0262832	0.000277376	5.90137	up	124.971	140.052	4.985	21.5705	162.918	74.6013	9.56649	14.7041	29.5262	3.85837	42.1078	25.2963	7.08477	7.40409	3.94202	5.80911	6.45356	6.36844	3.98066	4.24541	4.50222	2.24186	3.6654	3.06013	Detected	Detected	Not Detected	Detected	Detected	Detected	Not Detected	Detected	Detected	Not Detected	Detected	Detected	0	A_33_P3248610	A_33_P3248610	NM_018263	NM_018263	NM_018263	Hs.119815	55252	ASXL2
A_33_P3351745	0.0387667	0.00210887	5.89655	up	241.435	198.432	14.6285	49.2926	569.346	562.578	18.87	34.1957	117.903	10.3798	105.241	32.3474	7.87172	7.79816	5.38407	7.03764	8.15036	8.92516	5.02232	5.64808	6.58801	3.33502	5.67834	3.53612	Detected	Detected	Detected	Detected	Detected	Detected	Detected	Detected	Detected	Not Detected	Detected	Detected	0	A_33_P3351745	A_33_P3351745	NM_024070	NM_024070	NM_024070	Hs.729356	79037	PVRIG
A_33_P3423551	0.028539	0.000447425	5.89533	up	717.846	507.353	86.6923	111.655	3026.48	242.012	14.4569	35.9931	164.102	62.9408	1208.96	33.6546	9.21651	8.92752	7.93027	8.15073	10.584	7.82559	4.5924	5.73638	7.07474	6.49836	9.75325	3.62202	Detected	Detected	Detected	Detected	Detected	Detected	Not Detected	Detected	Detected	Detected	Detected	Detected	0	A_33_P3423551	A_33_P3423551	NM_003897	NM_003897	NM_003897	Hs.76095	8870	IER3
A_23_P44421	0.0282819	0.000400274	5.87742	up	371.239	372.306	27.9776	211.654	257.364	186.883	24.1633	29.2242	80.977	17.2795	120.165	51.5247	8.38421	8.54629	6.314	8.99876	7.06097	7.5041	5.43168	5.38456	6.03474	4.07771	5.94792	4.60061	Detected	Detected	Detected	Detected	Detected	Detected	Detected	Detected	Detected	Not Detected	Detected	Detected	0	A_23_P44421	A_23_P44421	NM_153692	NM_153692	NM_153692	Hs.661014	203100	HTRA4
A_19_P00804072	0.0485124	0.00403442	5.87099	up	2713.44	351.888	43.1217	156.971	1392.91	3315.34	46.3488	81.6718	264.343	49.7008	338.479	73.8383	11.0509	8.46874	6.94528	8.60774	9.4152	11.4366	6.48685	7.11152	7.78624	6.0202	7.75866	5.43929	Detected	Detected	Detected	Detected	Detected	Detected	Detected	Detected	Detected	Detected	Detected	Detected	0	A_19_P00804072	A_19_P00804072	NM_001256071	NM_001256071	NM_001256071	Hs.740662	57674	RNF213
A_33_P3273309	0.0419666	0.00263183	5.86761	up	132.248	51.6671	3.16141	8.68787	48.0896	75.0146	2.39925	3.62159	23.5361	6.05191	37.9009	14.2544	7.15059	6.30708	3.20898	4.45773	4.815	6.37611	1.95539	2.5117	4.15224	2.73243	3.44609	2.201	Detected	Detected	Not Detected	Not Detected	Detected	Detected	Not Detected	Not Detected	Detected	Not Detected	Detected	Not Detected	0	A_33_P3273309	A_33_P3273309	NM_001040185	NM_001040185	NM_001040185	Hs.685640	91661	ZNF765
A_23_P94365	0.02321	7.01e-05	5.85463	up	57.056	45.2882	13.086	7.73884	72.8313	42.3132	9.25695	2.63551	29.5299	4.68716	23.0213	11.7597	6.18334	6.17003	5.23379	4.29881	5.40292	5.65123	3.93439	2.14159	4.5027	2.45848	2.59774	2.00775	Detected	Detected	Detected	Not Detected	Detected	Detected	Not Detected	Not Detected	Detected	Not Detected	Detected	Not Detected	0	A_23_P94365	A_23_P94365	NM_174922	NM_174922	NM_174922	Hs.283374	203054	ADCK5
A_23_P212042	0.0293416	0.000564784	5.83905	up	667.368	426.086	42.4856	170.443	188.821	880.657	30.2716	28.2721	111.435	34.8902	146.183	64.2828	9.12624	8.71007	6.92279	8.7236	6.65528	9.53638	5.79559	5.33061	6.4967	5.33222	6.33432	5.11054	Detected	Detected	Detected	Detected	Detected	Detected	Detected	Detected	Detected	Detected	Detected	Detected	0	A_23_P212042	A_23_P212042	NM_005929	NM_005929	NM_005929	Hs.184727	4241	MFI2
A_19_P00318425	0.045585	0.00338569	5.81885	up	568.854	674.576	61.0437	220.911	230.149	1050.16	88.0513	39.4254	207.25	13.7126	186.276	57.971	8.91696	9.29701	7.44338	9.04969	6.91841	9.78877	7.48741	5.89093	7.42166	3.71742	6.77926	4.87313	Detected	Detected	Detected	Detected	Detected	Detected	Detected	Detected	Detected	Not Detected	Detected	Detected	0	A_19_P00318425	A_19_P00318425	NM_001242690	NM_001242690	NM_001242690	Hs.363087	100288413	ERVMER34-1
A_33_P3569068	0.0225501	6.11e-05	5.81637	up	898.571	666.039	452.914	355.889	765.065	350.205	63.5727	105.134	424.74	30.7651	214.398	65.1273	9.49709	9.28021	10.1882	9.67466	8.55994	8.30235	6.98268	7.53738	8.48278	5.09173	7.02433	5.14281	Detected	Detected	Detected	Detected	Detected	Detected	Detected	Detected	Detected	Detected	Detected	Detected	0	A_33_P3569068	A_33_P3569068	NM_003550	NM_003550	NM_003550	Hs.654838	8379	MAD1L1
A_23_P96087	0.0268164	0.000333118	5.81537	up	76.2187	63.7959	22.0303	20.1618	446.979	112.688	19.4273	16.1055	53.8188	10.8405	31.1071	21.8925	6.51785	6.53457	5.96657	5.70983	7.80566	6.86864	5.06922	4.39385	5.42429	3.39259	3.07996	2.80399	Detected	Detected	Detected	Detected	Detected	Detected	Detected	Detected	Detected	Not Detected	Detected	Detected	0	A_23_P96087	A_23_P96087	NM_006026	NM_006026	NM_006026	Hs.75307	8971	H1FX
A_32_P142779	0.0223734	5.2e-05	5.80711	up	92.1933	68.9548	10.2049	19.5445	19.9867	18.0563	5.95711	3.42043	14.59	5.71523	15.5057	19.2227	6.74248	6.61432	4.89301	5.66165	3.5204	4.43991	3.36845	2.4522	3.42969	2.67571	2.12456	2.59423	Detected	Detected	Not Detected	Detected	Detected	Detected	Not Detected	Not Detected	Not Detected	Not Detected	Not Detected	Detected	0	A_32_P142779	A_32_P142779	NM_175882	NM_175882	NM_175882	Hs.144491	162540	SPPL2C
A_23_P36322	0.0350156	0.00147669	5.80122	up	62.7655	108.884	9.68575	4.78263	194.09	114.151	3.78823	11.5528	41.163	10.3235	38.5453	8.82573	6.2961	7.11905	4.82087	3.69824	6.69223	6.88664	2.80801	3.86761	5.01501	3.32841	3.4789	1.79706	Detected	Detected	Not Detected	Not Detected	Detected	Detected	Not Detected	Not Detected	Detected	Not Detected	Detected	Not Detected	0	A_23_P36322	A_23_P36322	NM_001567	NM_001567	NM_001567	Hs.523875	3636	INPPL1
A_33_P3287800	0.0215502	1.61e-05	5.79875	up	76.7792	81.6326	9.38523	23.5928	72.7132	55.7354	9.32689	7.42956	16.2132	7.94025	41.4404	21.4738	6.52814	6.80101	4.77549	5.94304	5.40106	6.00846	3.94493	3.28333	3.58022	3.02816	3.63266	2.77345	Detected	Detected	Not Detected	Detected	Detected	Detected	Not Detected	Not Detected	Not Detected	Not Detected	Detected	Detected	0	A_33_P3287800	A_33_P3287800	NM_001009812	NM_001009812	NM_001009812	Hs.516124	85474	LBX2
A_33_P3373134	0.0497283	0.00428845	5.7891	up	62.2626	74.1943	2.42171	3.04427	162.091	67.8301	2.42217	4.54064	22.3039	3.98254	37.5824	4.46472	6.28547	6.6952	2.52816	3.05095	6.44694	6.24919	2.01296	2.75669	4.06776	2.27588	3.43124	1.51133	Detected	Detected	Not Detected	Not Detected	Detected	Detected	Not Detected	Not Detected	Detected	Not Detected	Detected	Not Detected	0	A_33_P3373134	A_33_P3373134	NM_015284	NM_015284	NM_015284	Hs.643560	23334	SZT2
A_24_P296457	0.0371085	0.00183776	5.77754	up	75.6989	81.8587	6.34578	5.18285	126.635	83.4066	2.74179	7.33723	35.1451	6.74142	51.452	3.70702	6.51007	6.80395	4.25736	3.79617	6.12158	6.49991	2.34471	3.27028	4.77187	2.84709	4.11185	1.46052	Detected	Detected	Not Detected	Not Detected	Detected	Detected	Not Detected	Not Detected	Detected	Not Detected	Detected	Not Detected	0	A_24_P296457	A_24_P296457	NM_000294	NM_000294	NM_000294	Hs.65735	5261	PHKG2
A_24_P328231	0.0440583	0.00308224	5.76679	up	796.686	840.26	53.7531	83.604	651.816	568.336	36.5611	65.5132	247.661	25.2754	370.401	23.0112	9.34253	9.56993	7.26146	7.77078	8.34526	8.93794	6.10178	6.74867	7.68444	4.73001	7.90543	2.89095	Detected	Detected	Detected	Detected	Detected	Detected	Detected	Detected	Detected	Detected	Detected	Detected	0	A_24_P328231	A_24_P328231	NM_017871	NM_017871	NM_017871	Hs.6449	54973	CPSF3L
A_33_P3802558	0.0215502	2.19e-05	5.76422	up	763.035	646.178	365.339	363.254	304.448	385.316	96.7188	118.763	178.611	46.1565	85.733	61.6787	9.28795	9.24534	9.90802	9.70335	7.28926	8.42125	7.63104	7.73082	7.20375	5.8758	5.2366	5.01441	Detected	Detected	Detected	Detected	Detected	Detected	Detected	Detected	Detected	Detected	Detected	Detected	0	A_33_P3802558	A_33_P3802558	BC015643		BC015643
A_33_P3241511	0.0468098	0.00363912	5.72338	up	5298.46	354.505	415.474	12.1143	947.446	19.4812	24.0188	52.2532	122.643	10.0407	234.662	59.5259	12.0333	8.47971	10.0805	4.9329	8.85287	4.55707	5.42145	6.36655	6.64171	3.29555	7.17555	4.93434	Detected	Detected	Detected	Detected	Detected	Detected	Detected	Detected	Detected	Not Detected	Detected	Detected	0	A_33_P3241511	A_33_P3241511	NM_000185	NM_000185	NM_000185	Hs.474270	3053	SERPIND1
A_23_P166280	0.0215502	5e-06	5.72059	up	85.8355	45.8971	41.6679	79.2273	104.586	24.4215	9.45011	11.1958	33.6274	17.2261	35.9804	26.935	6.65959	6.18426	6.89307	7.69169	5.87948	4.88411	3.96471	3.82322	4.70542	4.07236	3.35069	3.17883	Detected	Detected	Detected	Detected	Detected	Detected	Not Detected	Not Detected	Detected	Detected	Detected	Detected	0	A_23_P166280	A_23_P166280	ENST00000407780
A_23_P73632	0.0445931	0.00321107	5.71498	up	1236.32	1032.15	73.9674	880.133	667.958	789.445	96.1308	75.6941	234.419	31.0284	554.479	64.6128	9.9401	9.83136	7.71593	10.8159	8.38087	9.39236	7.62247	6.98494	7.60681	5.10866	8.54282	5.12231	Detected	Detected	Detected	Detected	Detected	Detected	Detected	Detected	Detected	Detected	Detected	Detected	0	A_23_P73632	A_23_P73632	NM_000475	NM_000475	NM_000475	Hs.268490	190	NR0B1
A_23_P111155	0.0258353	0.000239589	5.71279	up	122.191	75.3827	8.08928	16.1449	182.558	109.99	12.7297	10.4451	33.5188	6.19472	50.4338	17.065	7.05817	6.71053	4.57071	5.3639	6.61017	6.84082	4.39636	3.72324	4.70024	2.75829	4.06573	2.42527	Detected	Detected	Not Detected	Detected	Detected	Detected	Detected	Not Detected	Detected	Not Detected	Detected	Detected	0	A_23_P111155	A_23_P111155	NM_181842	NM_181842	NM_181842	Hs.234027	221527	ZBTB12
A_23_P418274	0.041215	0.00250339	5.70291	up	111.59	167.366	3.80087	11.962	113.382	102.949	5.20817	7.80754	37.5109	9.37993	44.0072	15.0784	6.95334	7.60358	3.52798	4.914	5.98334	6.75941	3.21505	3.34516	4.87192	3.21468	3.75668	2.26797	Detected	Detected	Not Detected	Not Detected	Detected	Detected	Not Detected	Not Detected	Detected	Not Detected	Detected	Not Detected	0	A_23_P418274	A_23_P418274	NM_182504	NM_182504	NM_182504	Hs.647026	135886	WBSCR28
A_21_P0014378	0.0355541	0.00157756	5.69501	up	272.653	198.802	14.94	22.143	170.532	75.8502	5.79431	27.5059	102.174	7.27009	71.2512	13.8032	8.00817	7.8016	5.41337	5.85177	6.51461	6.38908	3.33779	5.28406	6.36913	2.92943	4.83541	2.1646	Detected	Detected	Detected	Detected	Detected	Detected	Not Detected	Detected	Detected	Not Detected	Detected	Not Detected	0	A_21_P0014378	A_21_P0014378	ENST00000592362		AK056243	Hs.657027	284459	HKR1
A_33_P3239143	0.0329622	0.00108979	5.69389	up	60027.6	27274.8	80600.3	54031.6	23561.9	1311.5	1945.9	1587.61	17179.7	3679.95	1507.62	2280.73	15.6256	14.6489	16.3348	15.8332	13.7657	10.078	11.7945	11.5135	13.857	12.6496	10.0921	11.323	Detected	Detected	Detected	Detected	Detected	Detected	Detected	Detected	Detected	Detected	Detected	Detected	0	A_33_P3239143	A_33_P3239143	NM_198458	NM_198458	NM_198458	Hs.447840	162968	ZNF497
A_33_P3323029	0.021928	3.93e-05	5.69084	up	33.7676	33.3277	30.1465	28.641	16.0546	16.8601	5.74222	3.97924	10.3025	6.89887	21.0118	15.7523	5.57532	5.85528	6.42184	6.2379	3.21769	4.33971	3.3272	2.61321	2.98423	2.87114	2.4784	2.32171	Detected	Detected	Detected	Detected	Detected	Detected	Not Detected	Not Detected	Not Detected	Not Detected	Not Detected	Detected	0	A_33_P3323029	A_33_P3323029	AK098018		AK098018	Hs.534784	400965	LOC400965
A_24_P75920	0.0267944	0.000315788	5.69064	up	996.706	568.654	60.1453	169.909	384.059	137.531	33.3114	53.7244	152.16	31.8655	193.432	26.9999	9.63842	9.06623	7.42229	8.7185	7.59662	7.12097	5.94694	6.41107	6.96632	5.15979	6.84344	3.18391	Detected	Detected	Detected	Detected	Detected	Detected	Detected	Detected	Detected	Detected	Detected	Detected	0	A_24_P75920	A_24_P75920	NM_001080503	NM_001080503	NM_001080503	Hs.631636	126075	CCDC159
A_33_P3419239	0.0349735	0.0014494	5.6897	up	59.1343	426.339	9.21609	37.0528	198.134	33.8743	24.4731	7.05765	35.1149	12.912	31.2644	26.5876	6.22413	8.71112	4.75155	6.62076	6.71833	5.3436	5.45296	3.22325	4.77004	3.63112	3.09024	3.15176	Detected	Detected	Not Detected	Detected	Detected	Detected	Detected	Not Detected	Detected	Not Detected	Detected	Detected	0	A_33_P3419239	A_33_P3419239	NM_023036	NM_023036	NM_023036	Hs.147472	64446	DNAI2
A_33_P3235321	0.0250229	0.000107334	5.64922	up	143.23	516.262	45.1168	76.0785	202.731	119.616	39.4184	18.7312	71.2692	35.5121	39.2859	39.1726	7.24938	8.95266	7.00977	7.63623	6.74779	6.94618	6.22546	4.64428	5.8394	5.36551	3.51687	3.9622	Detected	Detected	Detected	Detected	Detected	Detected	Detected	Detected	Detected	Detected	Detected	Detected	0	A_33_P3235321	A_33_P3235321	NM_032872	NM_032872	NM_032872	Hs.469175	84958	SYTL1
A_33_P3239532	0.0367041	0.00178454	5.62172	up	130.965	83.5314	3.59796	16.9413	40.3801	72.9364	4.49703	10.1886	30.1998	2.9452	35.1648	15.2144	7.14034	6.8253	3.43286	5.44303	4.55802	6.33877	3.03906	3.68646	4.54001	1.94057	3.30725	2.27891	Detected	Detected	Not Detected	Detected	Detected	Detected	Not Detected	Not Detected	Detected	Not Detected	Detected	Not Detected	0	A_33_P3239532	A_33_P3239532	NM_017715	NM_017715	NM_017715	Hs.435302	7551	ZNF3
A_23_P24389	0.021928	4.4e-05	5.61587	up	28.5962	19.2798	8.68071	12.9664	72.1978	45.6892	4.58798	3.2399	22.7751	2.96298	29.9793	12.8049	5.37723	5.32489	4.66716	5.0308	5.39148	5.75172	3.06192	2.39219	4.10167	1.95011	3.01408	2.08625	Detected	Detected	Not Detected	Detected	Detected	Detected	Not Detected	Not Detected	Detected	Not Detected	Detected	Not Detected	0	A_23_P24389	A_23_P24389	NM_032251	NM_032251	NM_032251	Hs.98564	283234	CCDC88B
A_24_P289726	0.030849	0.000766828	5.61306	up	100.093	91.9374	10.8402	17.0872	109.995	107.713	5.68378	16.4211	53.2567	10.1982	42.3205	10.2049	6.83455	6.93162	4.97769	5.45633	5.94461	6.81705	3.31628	4.42524	5.40727	3.31345	3.67568	1.89121	Detected	Detected	Not Detected	Detected	Detected	Detected	Not Detected	Detected	Detected	Not Detected	Detected	Not Detected	0	A_24_P289726	A_24_P289726	NM_002809	NM_002809	NM_002809	Hs.12970	5709	PSMD3
A_23_P56127	0.0464189	0.00355158	5.60383	up	176.286	72.2629	6.66559	4.35975	173.446	75.1245	2.44796	8.63048	43.5755	5.12735	74.6522	10.5998	7.49491	6.66565	4.32168	3.5783	6.53842	6.3778	2.06855	3.47374	5.10181	2.55855	4.93525	1.92039	Detected	Detected	Not Detected	Not Detected	Detected	Detected	Not Detected	Not Detected	Detected	Not Detected	Detected	Not Detected	0	A_23_P56127	A_23_P56127	NM_019108	NM_019108	NM_019108	Hs.466875	56006	SMG9
A_24_P121956	0.021755	3.15e-05	5.57226	up	101.319	105.687	74.3255	67.0019	162.974	82.9311	12.9435	19.3203	60.1356	9.75134	88.5664	38.5287	6.84663	7.08687	7.72401	7.45528	6.45403	6.49483	4.42204	4.69352	5.58848	3.25806	5.30888	3.92108	Detected	Detected	Detected	Detected	Detected	Detected	Not Detected	Detected	Detected	Not Detected	Detected	Detected	0	A_24_P121956	A_24_P121956	NM_173804	NM_173804	NM_173804	Hs.135215	255043	TMEM86B
A_33_P3313258	0.032092	0.000982884	5.56175	up	336.151	227.613	15.1449	12.8082	331.292	159.683	7.51153	20.3992	55.0657	10.7724	136.068	24.9513	8.2578	7.95036	5.43424	5.01518	7.39896	7.30405	3.64947	4.78502	5.45855	3.38427	6.19731	3.03274	Detected	Detected	Detected	Not Detected	Detected	Detected	Not Detected	Detected	Detected	Not Detected	Detected	Detected	0	A_33_P3313258	A_33_P3313258	NM_031921	NM_031921	NM_031921	Hs.729021	83858	ATAD3B
A_33_P3418158	0.0254975	0.000216526	5.55759	up	59.3568	48.0038	4.53637	27.4647	39.6735	69.3407	7.06277	6.42313	18.5068	4.87545	27.7065	18.8507	6.22927	6.23144	3.81164	6.17747	4.53133	6.27359	3.57271	3.11757	3.77293	2.50135	2.87852	2.5649	Detected	Detected	Not Detected	Detected	Detected	Detected	Not Detected	Not Detected	Detected	Not Detected	Detected	Detected	0	A_33_P3418158	A_33_P3418158	NM_001271711	NM_001271711	NM_001271711	Hs.179522	29988	SLC2A8
A_23_P76034	0.0250229	0.000158619	5.55508	up	189.642	300.292	44.7792	48.6018	190.324	927.656	19.0652	27.9785	55.8822	31.2188	100.405	55.5508	7.5818	8.27818	6.99889	7.01643	6.66683	9.61074	5.03972	5.3134	5.47951	5.12018	5.57856	4.77868	Detected	Detected	Detected	Detected	Detected	Detected	Detected	Detected	Detected	Detected	Detected	Detected	0	A_23_P76034	A_23_P76034	NM_203286	NM_203286	NM_203286	Hs.334846	5818	PVRL1
A_21_P0000062	0.0250229	0.000127944	5.54412	up	49.0026	50.6497	7.20904	6.4498	33.4809	29.2086	6.53028	2.15702	14.3505	4.41296	22.2839	8.19731	6.00485	6.28696	4.42105	4.06089	4.2785	5.13714	3.47801	1.782	3.4057	2.38847	2.55245	1.75702	Detected	Detected	Not Detected	Not Detected	Detected	Detected	Not Detected	Not Detected	Not Detected	Not Detected	Detected	Not Detected	0	A_21_P0000062	A_21_P0000062	NM_001166242	NM_001166242	NM_001166242	Hs.659565	128977	C22orf39
A_33_P3287760	0.0267948	0.000327612	5.54265	up	157.84	107.35	5.25068	44.1661	90.7277	83.5117	9.10754	15.2502	28.0534	13.0923	40.7695	22.3623	7.35932	7.10383	4.0087	6.87696	5.69717	6.50207	3.90924	4.30401	4.4228	3.64909	3.59595	2.84349	Detected	Detected	Not Detected	Detected	Detected	Detected	Not Detected	Detected	Detected	Not Detected	Detected	Detected	0	A_33_P3287760	A_33_P3287760	NM_001282862	NM_001282862	NM_001282862	Hs.125293	221002	RASGEF1A
A_24_P415601	0.0322001	0.000996785	5.54232	up	9042.19	941.116	50.3279	115.397	937.634	81.8727	64.5095	66.5758	134.084	40.2253	234.928	60.4597	12.7418	9.71424	7.16637	8.19189	8.83708	6.48021	7.00358	6.77613	6.77868	5.60292	7.17773	4.96964	Detected	Detected	Detected	Detected	Detected	Detected	Detected	Detected	Detected	Detected	Detected	Detected	0	A_24_P415601	A_24_P415601	NM_002939	NM_002939	NM_002939	Hs.530687	6050	RNH1
A_24_P101704	0.0215502	1.57e-05	5.54134	up	46.1484	32.9465	7.92339	19.5363	55.0365	31.3322	4.52778	4.36798	15.0316	8.09894	31.846	11.6217	5.93617	5.84434	4.54207	5.66106	5.0093	5.23335	3.04736	2.71615	3.46962	3.05013	3.12466	1.99696	Detected	Detected	Not Detected	Detected	Detected	Detected	Not Detected	Not Detected	Not Detected	Not Detected	Detected	Not Detected	0	A_24_P101704	A_24_P101704	NM_004560	NM_004560	NM_004560	Hs.98255	4920	ROR2
A_21_P0008653	0.0215502	1.46e-05	5.5389	up	102.852	89.8882	25.6595	17.4876	78.951	27.5667	10.4388	7.70373	39.4753	6.25488	42.8493	16.1288	6.86323	6.90587	6.18594	5.49201	5.51495	5.05306	4.10135	3.32731	4.94892	2.77049	3.69735	2.35203	Detected	Detected	Detected	Detected	Detected	Detected	Not Detected	Not Detected	Detected	Not Detected	Detected	Not Detected	0	A_21_P0008653	A_21_P0008653	lnc-THSD4-3:3			Hs.187354		lnc-THSD4-3
A_23_P112103	0.0250229	0.000160069	5.51099	up	196.158	128.402	39.0241	46.6499	220.235	101.822	10.1092	27.292	75.2212	13.1865	112.818	21.6377	7.62398	7.30704	6.79633	6.95414	6.86063	6.74595	4.05675	5.27144	5.9218	3.65888	5.81845	2.78689	Detected	Detected	Detected	Detected	Detected	Detected	Not Detected	Detected	Detected	Not Detected	Detected	Detected	0	A_23_P112103	A_23_P112103	NM_024736	NM_024736	NM_024736	Hs.118983	79792	GSDMD
A_23_P60775	0.0250229	0.000168902	5.50945	up	72.6866	71.4816	19.4898	33.4619	27.2653	42.1515	11.5194	3.53071	31.2331	7.31858	34.5059	20.7229	6.46746	6.6543	5.79355	6.47914	3.97117	5.64508	4.24252	2.48695	4.59046	2.93731	3.27089	2.71113	Detected	Detected	Detected	Detected	Detected	Detected	Not Detected	Not Detected	Detected	Not Detected	Detected	Detected	0	A_23_P60775	A_23_P60775	NM_021938	NM_021938	NM_021938	Hs.655747	60680	CELF5
A_23_P435833	0.0251343	0.000184447	5.50311	up	58.5145	88.9775	12.755	13.8819	115.621	115.759	13.6733	16.2659	27.5817	3.41481	49.9718	13.2343	6.21148	6.89562	5.19443	5.13059	6.00803	6.90698	4.50787	4.40851	4.39621	2.10698	4.04515	2.12094	Detected	Detected	Not Detected	Detected	Detected	Detected	Detected	Detected	Detected	Not Detected	Detected	Not Detected	0	A_23_P435833	A_23_P435833	NM_003934	NM_003934	NM_003934	Hs.98751	8939	FUBP3
A_23_P153867	0.0344409	0.00134889	5.46866	up	61.6953	141.754	7.61228	3.39694	122.092	139.293	7.83001	17.2812	31.899	3.83785	32.6483	7.05039	6.27515	7.41625	4.49205	3.22524	6.07593	7.13602	3.70252	4.50876	4.62376	2.23605	3.16862	1.67383	Detected	Detected	Not Detected	Not Detected	Detected	Detected	Not Detected	Detected	Detected	Not Detected	Detected	Not Detected	0	A_23_P153867	A_23_P153867	NM_024552	NM_024552	NM_024552	Hs.515111	79603	CERS4
A_23_P37778	0.0367099	0.00178573	5.46632	up	536.92	465.005	14.0965	34.9997	165.075	198.869	13.6272	22.0679	68.8349	13.6203	129.684	37.4841	8.8448	8.81646	5.33597	6.53727	6.47211	7.578	4.50359	4.91883	5.78611	3.70756	6.10375	3.86134	Detected	Detected	Not Detected	Detected	Detected	Detected	Detected	Detected	Detected	Not Detected	Detected	Detected	0	A_23_P37778	A_23_P37778	NM_013241	NM_013241	NM_013241	Hs.95231	29109	FHOD1
A_23_P215525	0.0301209	0.00066793	5.41774	up	1230.07	1044.9	37.5768	84.3085	1874.8	750.004	35.5909	60.2311	145.856	66.823	295.874	64.8083	9.93373	9.84698	6.74314	7.78114	9.86045	9.32106	6.05723	6.60966	6.90503	6.61489	7.54396	5.12959	Detected	Detected	Detected	Detected	Detected	Detected	Detected	Detected	Detected	Detected	Detected	Detected	0	A_23_P215525	A_23_P215525	NM_015550	NM_015550	NM_015550	Hs.520259	26031	OSBPL3
A_24_P608302	0.0365176	0.00175269	5.41773	up	6652.44	7437.8	423.47	3940.98	3580.54	3350.76	464.669	424.952	1340.89	149.636	1931.32	150.91	12.3166	12.5384	10.105	12.7687	10.8334	11.4597	9.90037	9.68612	10.1796	8.12811	10.4915	7.01001	Detected	Detected	Detected	Detected	Detected	Detected	Detected	Detected	Detected	Detected	Detected	Detected	0	A_24_P608302	A_24_P608302	lnc-KIAA1755-5:7		BC012894	Hs.400876		lnc-KIAA1755-5
A_24_P169896	0.0351934	0.00150485	5.41415	up	354.307	84.6345	33.6433	95.7023	207.584	113.362	15.9191	16.2969	93.7349	6.35086	173.839	38.098	8.32534	6.83843	6.58683	7.94787	6.78101	6.87846	4.74577	4.41205	6.24602	2.7867	6.65011	3.89688	Detected	Detected	Detected	Detected	Detected	Detected	Detected	Detected	Detected	Not Detected	Detected	Detected	0	A_24_P169896	A_24_P169896	NM_001243541	NM_001243541	NM_001243541	Hs.734636	100653515	KIAA1731NL
A_23_P111865	0.033425	0.00114358	5.41013	up	569.541	401.431	15.8344	404.504	128.374	237.683	26.5856	31.6705	72.6005	32.6225	89.2248	54.0008	8.91949	8.63854	5.49806	9.83527	6.13915	7.80466	5.58984	5.51892	5.86749	5.20419	5.32635	4.71442	Detected	Detected	Detected	Detected	Detected	Detected	Detected	Detected	Detected	Detected	Detected	Detected	0	A_23_P111865	A_23_P111865	NM_145914	NM_145914	NM_145914	Hs.632294	7589	ZSCAN21
A_33_P3217534	0.04436	0.00315139	5.40664	up	167.203	80.0856	10	17.3648	452.893	251.945	4.11287	24.3496	80.1093	12.6631	78.4049	24.041	7.42858	6.77578	4.86574	5.48159	7.82462	7.87598	2.92195	5.08558	6.01888	3.60546	5.04521	2.96681	Detected	Detected	Not Detected	Detected	Detected	Detected	Not Detected	Detected	Detected	Not Detected	Detected	Detected	0	A_33_P3217534	A_33_P3217534	NM_053043	NM_053043	NM_053043	Hs.591815	155435	RBM33
A_24_P16815	0.0291191	0.000515414	5.39506	up	291.191	317.186	13.821	39.4195	154.383	116.462	18.7486	28.6898	81.754	14.2523	45.3514	26.2484	8.08947	8.33867	5.307	6.70543	6.37797	6.91537	5.01148	5.35454	6.04716	3.77553	3.82562	3.12975	Detected	Detected	Detected	Detected	Detected	Detected	Detected	Detected	Detected	Not Detected	Detected	Detected	0	A_24_P16815	A_24_P16815	NM_005096	NM_005096	NM_005096	Hs.522684	9203	ZMYM3
A_33_P3261803	0.0291191	0.000525983	5.38852	up	34.9928	39.4149	3.15742	5.40399	23.0995	23.5827	2.67926	2.08209	14.5324	2.63717	15.1292	9.23262	5.61689	6.02693	3.20655	3.84648	3.72745	4.83331	2.31325	1.54979	3.4236	1.46669	2.10096	1.82399	Detected	Detected	Not Detected	Not Detected	Detected	Detected	Not Detected	Not Detected	Not Detected	Not Detected	Not Detected	Not Detected	0	A_33_P3261803	A_33_P3261803	NM_001441	NM_001441	NM_001441	Hs.720143	2166	FAAH
A_23_P571	0.032383	0.00101279	5.37822	up	15.5653	5.68989	31.1771	14.7345	556.276	171.189	12.1604	10.8531	17.9151	4.81785	70.6081	16.2465	4.64367	4.21136	6.47449	5.21998	8.11749	7.39307	4.3257	3.77924	3.72621	2.48967	4.81519	2.36128	Detected	Not Detected	Detected	Detected	Detected	Detected	Not Detected	Detected	Detected	Not Detected	Detected	Not Detected	0	A_23_P571	A_23_P571	NM_006516	NM_006516	NM_006516	Hs.473721	6513	SLC2A1
A_33_P3379967	0.033508	0.0011821	5.35792	up	4144.41	1048.71	209.382	548.371	2813.62	971.362	61.2753	169.799	744.858	60.0213	916.726	107.228	11.6558	9.85187	9.18903	10.2196	10.4746	9.6723	6.92735	8.29669	9.30708	6.40145	9.30773	6.29281	Detected	Detected	Detected	Detected	Detected	Detected	Detected	Detected	Detected	Detected	Detected	Detected	0	A_33_P3379967	A_33_P3379967	NM_001098478	NM_001098478	NM_001098478	Hs.519972	3134	HLA-F
A_23_P218317	0.0250229	0.000139363	5.34783	up	173.786	72.7623	13.0474	19.631	264.768	47.9677	11.1058	18.8853	43.9752	7.12056	59.7521	13.4354	7.47672	6.67281	5.22973	5.66854	7.09727	5.81646	4.18862	4.65687	5.11525	2.90651	4.44466	2.13591	Detected	Detected	Not Detected	Detected	Detected	Detected	Not Detected	Detected	Detected	Not Detected	Detected	Not Detected	0	A_23_P218317	A_23_P218317	NM_001038618	NM_001038618	NM_001038618	Hs.256526	26502	NARF
A_23_P131683	0.0254975	0.000212261	5.34675	up	643.629	433.666	43.095	59.556	452.018	212.962	49.7197	38.3583	151.882	13.6438	117.051	39.8877	9.07813	8.72915	6.94418	7.29448	7.82137	7.66478	6.60338	5.84554	6.96207	3.70966	5.89567	4.0038	Detected	Detected	Detected	Detected	Detected	Detected	Detected	Detected	Detected	Not Detected	Detected	Detected	0	A_23_P131683	A_23_P131683	NM_012326	NM_012326	NM_012326	Hs.515860	22924	MAPRE3
A_33_P3283237	0.04436	0.00315289	5.343	up	386.581	353.501	4.65078	29.2355	164.507	289.568	13.615	23.713	44.3843	23.4095	64.0852	26.903	8.4325	8.47546	3.84702	6.2717	6.46683	8.04659	4.5027	5.04058	5.12973	4.59222	4.59354	3.17543	Detected	Detected	Not Detected	Detected	Detected	Detected	Detected	Detected	Detected	Detected	Detected	Detected	0	A_33_P3283237	A_33_P3283237	NM_206923	NM_206923	NM_206923	Hs.673601	404281	YY2
A_23_P79927	0.0419081	0.00261736	5.34077	up	1100.77	986.222	49.3031	98.8402	1146.04	2379.34	32.2358	85.1363	166.535	58.4268	538.824	68.2243	9.78	9.77349	7.13544	7.98916	9.13881	10.9487	5.89461	7.17878	7.09614	6.3499	8.49013	5.25373	Detected	Detected	Detected	Detected	Detected	Detected	Detected	Detected	Detected	Detected	Detected	Detected	0	A_23_P79927	A_23_P79927	NM_006392	NM_006392	NM_006392	Hs.376064	10528	NOP56
A_23_P218817	0.0438034	0.00300538	5.33495	up	444.575	227.389	17.0844	26.1995	256.439	647.169	14.8892	32.9608	84.9889	18.5398	121.151	31.2484	8.61081	7.94976	5.60363	6.10742	7.05478	9.11858	4.63667	5.58607	6.10476	4.19352	5.96388	3.46723	Detected	Detected	Detected	Detected	Detected	Detected	Detected	Detected	Detected	Detected	Detected	Detected	0	A_23_P218817	A_23_P218817	NM_152246	NM_152246	NM_152246	Hs.439777	1375	CPT1B
A_23_P88848	0.0457751	0.00342182	5.3299	up	72.7369	93.7995	17.87	4.19901	342.193	247.64	4.31903	21.2889	69.1533	7.15174	81.5871	8.08392	6.46862	6.95441	5.67366	3.5281	7.44189	7.85457	2.98894	4.85928	5.79268	2.91103	5.13382	1.75085	Detected	Detected	Detected	Not Detected	Detected	Detected	Not Detected	Detected	Detected	Not Detected	Detected	Not Detected	0	A_23_P88848	A_23_P88848	NM_017803	NM_017803	NM_017803	Hs.534460	54920	DUS2
A_33_P3237266	0.0250229	0.000120837	5.29856	up	106.333	146.087	9.18874	17.5885	107.833	41.7901	10.2294	14.3636	35.063	5.57104	38.7262	18.4252	6.89966	7.4504	4.74741	5.50064	5.91753	5.63409	4.07244	4.20704	4.76771	2.64757	3.48843	2.53293	Detected	Detected	Not Detected	Detected	Detected	Detected	Not Detected	Detected	Detected	Not Detected	Detected	Not Detected	0	A_33_P3237266	A_33_P3237266	ENST00000428056		AF050145		3423	IDS
A_33_P3280040	0.0334426	0.00115382	5.27718	up	77.131	63.4279	11.6355	21.2144	411.005	153.439	6.9829	16.62	47.1388	15.4645	97.4337	9.27217	6.53503	6.52731	5.07125	5.7847	7.69049	7.25606	3.5597	4.44408	5.22304	3.89809	5.51528	1.82606	Detected	Detected	Not Detected	Detected	Detected	Detected	Not Detected	Detected	Detected	Not Detected	Detected	Not Detected	0	A_33_P3280040	A_33_P3280040	ENST00000566858		AK125549	Hs.740440
A_21_P0003813	0.0335302	0.00120096	5.26458	up	90.6751	185.344	3.73883	80.548	76.4355	43.7047	4.2495	16.28	25.1979	15.4421	55.9041	19.4796	6.72255	7.71465	3.50078	7.71724	5.46803	5.69302	2.96738	4.41027	4.25692	3.89564	4.296	2.61214	Detected	Detected	Not Detected	Detected	Detected	Detected	Not Detected	Detected	Detected	Not Detected	Detected	Detected	0	A_21_P0003813	A_21_P0003813	NR_125933	NR_125933	NR_125933	Hs.432281	102723766	LOC102723766
A_23_P212458	0.0291191	0.000515282	5.26386	up	787.66	220.659	63.1142	139.854	1866.44	806.974	35.2641	61.4492	147.532	53.2305	369.498	47.7867	9.3287	7.9164	7.49433	8.44883	9.85622	9.42406	6.0427	6.6416	6.92161	6.16187	7.90224	4.42179	Detected	Detected	Detected	Detected	Detected	Detected	Detected	Detected	Detected	Detected	Detected	Detected	0	A_23_P212458	A_23_P212458	NM_013336	NM_013336	NM_013336	Hs.518236	29927	SEC61A1
A_33_P3316884	0.0215502	2.75e-05	5.25897	up	31.7497	21.7794	16.527	16.8254	25.4551	10.4436	3.04213	5.45074	11.6749	2.91748	29.2507	6.48056	5.49973	5.43732	5.55805	5.43257	3.86878	3.6749	2.49413	2.94567	3.13358	1.92181	2.96864	1.63883	Detected	Detected	Detected	Detected	Detected	Not Detected	Not Detected	Not Detected	Not Detected	Not Detected	Detected	Not Detected	0	A_33_P3316884	A_33_P3316884	THC2574155
A_23_P501451	0.0444903	0.00319175	5.2577	up	188.596	98.3786	2.44364	7.93973	176.237	135.02	8.3143	16.5953	23.8084	3.82175	46.0957	15.8576	7.57486	7.00587	2.60988	4.33205	6.56075	7.09973	3.7843	4.44114	4.16971	2.23124	3.86002	2.33014	Detected	Detected	Not Detected	Not Detected	Detected	Detected	Not Detected	Detected	Detected	Not Detected	Detected	Not Detected	0	A_23_P501451	A_23_P501451	NM_001014999	NM_001014999	NM_001014999	Hs.729791	548593	SLX1A
A_24_P236251	0.0238832	8.73e-05	5.2565	up	32.604	54.4633	7.74361	15.3835	23.1543	19.9054	2.51092	4.29806	10.7835	3.25171	23.0973	25.5016	5.53133	6.36283	4.51401	5.28771	3.73022	4.58572	2.17218	2.69772	3.04139	2.05786	2.6015	3.07657	Detected	Detected	Not Detected	Detected	Detected	Detected	Not Detected	Not Detected	Not Detected	Not Detected	Not Detected	Detected	0	A_24_P236251	A_24_P236251	NM_003836	NM_003836	NM_003836	Hs.533717	8788	DLK1
A_23_P56140	0.0282819	0.000395902	5.25526	up	145.679	169.781	21.8359	36.4086	406.152	171.461	14.2236	26.9749	89.8512	11.8799	98.6856	25.4768	7.26874	7.61855	5.95267	6.59458	7.67252	7.39491	4.56739	5.25221	6.18669	3.51536	5.54358	3.07416	Detected	Detected	Detected	Detected	Detected	Detected	Not Detected	Detected	Detected	Not Detected	Detected	Detected	0	A_23_P56140	A_23_P56140	NM_001319	NM_001319	NM_001319	Hs.651905	1455	CSNK1G2
A_21_P0011288	0.0349735	0.00146473	5.24966	up	2481.23	2930.97	69.8408	482.065	1198.44	642.641	53.0077	100.929	409.908	77.1403	400.119	107.233	10.9224	11.2695	7.63554	10.0522	9.20091	9.10826	6.70512	7.46962	8.43314	6.90554	8.029	6.29297	Detected	Detected	Detected	Detected	Detected	Detected	Detected	Detected	Detected	Detected	Detected	Detected	0	A_21_P0011288	A_21_P0011288	NM_012102	NM_012102	NM_012102	Hs.463041	473	RERE
A_24_P324640	0.0258313	0.000230722	5.24553	up	132.399	187.91	100.439	9.55338	241.589	203.275	6.87251	70.6204	119.517	5.29302	79.9276	26.5431	7.15219	7.73004	8.14369	4.58862	6.97862	7.60642	3.53919	6.87525	6.60673	2.59433	5.0889	3.14865	Detected	Detected	Detected	Not Detected	Detected	Detected	Not Detected	Detected	Detected	Not Detected	Detected	Detected	0	A_24_P324640	A_24_P324640	NM_014480	NM_014480	NM_014480	Hs.438994	27300	ZNF544
A_32_P69930	0.0250229	0.000114049	5.2443	up	4473.27	2308.56	1658.27	2735.74	2360.13	291.209	288.772	224.469	900.254	216.724	182.404	227.521	11.7735	10.9576	11.8171	12.3152	10.2105	8.05393	9.22455	8.71636	9.59991	8.72388	6.74248	7.77617	Detected	Detected	Detected	Detected	Detected	Detected	Detected	Detected	Detected	Detected	Detected	Detected	0	A_32_P69930	A_32_P69930	NM_153376	NM_153376	NM_153376	Hs.656757	257236	CCDC96
A_23_P140830	0.0293372	0.000561391	5.24346	up	87.0876	111.17	11.9358	13.0324	64.0604	184.973	9.65809	16.3905	41.8384	6.08493	40.6401	18.7142	6.6762	7.14337	5.10405	5.03873	5.22754	7.49237	3.99383	4.42197	5.04	2.73867	3.58957	2.55511	Detected	Detected	Not Detected	Detected	Detected	Detected	Not Detected	Detected	Detected	Not Detected	Detected	Detected	0	A_23_P140830	A_23_P140830	NM_024712	NM_024712	NM_024712	Hs.377416	79767	ELMO3
A_33_P3381684	0.0301779	0.00067179	5.23085	up	41.1672	88.7109	7.56123	46.0999	37.747	105.803	11.0198	4.78946	23.4368	11.1407	40.4255	23.2008	5.80403	6.89191	4.48253	6.9364	4.45866	6.79405	4.17699	2.81031	4.14573	3.4296	3.57791	2.90476	Detected	Detected	Not Detected	Detected	Detected	Detected	Not Detected	Not Detected	Detected	Not Detected	Detected	Detected	0	A_33_P3381684	A_33_P3381684	NM_007113	NM_007113	NM_007113	Hs.432416	7062	TCHH
A_24_P219378	0.0426365	0.00277123	5.22143	up	512.44	232.708	48.3979	166.714	415.517	1278.35	33.1862	66.9801	138.807	20.9473	253.3	54.9986	8.78002	7.97847	7.11088	8.6907	7.70555	10.046	5.94097	6.7838	6.827	4.39523	7.30137	4.75657	Detected	Detected	Detected	Detected	Detected	Detected	Detected	Detected	Detected	Detected	Detected	Detected	0	A_24_P219378	A_24_P219378	NM_020764	NM_020764	NM_020764	Hs.643537	57524	CASKIN1
A_21_P0012300	0.034227	0.00131529	5.21407	up	1124.31	582.755	73.6303	75.5181	579.266	1038.21	55.254	59.4027	258.109	20.5303	306.493	56.8758	9.81086	9.10291	7.70992	7.62427	8.17515	9.76977	6.76897	6.58801	7.752	4.36327	7.59587	4.83029	Detected	Detected	Detected	Detected	Detected	Detected	Detected	Detected	Detected	Detected	Detected	Detected	0	A_21_P0012300	A_21_P0012300	TCONS_l2_00018071					XLOC_l2_009571
A_21_P0012339	0.0409331	0.00247083	5.21114	up	2871.52	2058.36	190.41	429.415	2076.62	2105.99	85.5781	200.446	706.832	55.7989	1349.95	92.5102	11.138	10.7816	9.05013	9.90656	10.0117	10.7698	7.44138	8.54149	9.22904	6.25986	9.93373	5.96268	Detected	Detected	Detected	Detected	Detected	Detected	Detected	Detected	Detected	Detected	Detected	Detected	0	A_21_P0012339	A_21_P0012339	NM_058004	NM_058004	NM_058004	Hs.529438	5297	PI4KA
A_23_P106042	0.030849	0.000773256	5.20252	up	61.5796	69.1287	8.28067	22.459	37.69	121.029	15.6923	5.89958	30.5889	5.13755	32.1594	17.9534	6.27335	6.61696	4.6024	5.87171	4.45601	6.96026	4.72566	3.02341	4.55882	2.56168	3.14286	2.493	Detected	Detected	Not Detected	Detected	Detected	Detected	Detected	Not Detected	Detected	Not Detected	Detected	Detected	0	A_23_P106042	A_23_P106042	NM_001037288	NM_001037288	NM_001037288	Hs.99272	116173	CMTM5
A_23_P55998	0.0293372	0.000561249	5.18768	up	139.982	234.123	19.1037	40.1	162.565	278.637	12.4298	22.8518	60.0711	22.1715	85.6913	27.9552	7.22083	7.98638	5.76767	6.73365	6.45054	7.9985	4.35864	4.9785	5.58683	4.49685	5.23523	3.25097	Detected	Detected	Detected	Detected	Detected	Detected	Not Detected	Detected	Detected	Detected	Detected	Detected	0	A_23_P55998	A_23_P55998	NM_005628	NM_005628	NM_005628	Hs.631582	6510	SLC1A5
A_23_P40527	0.030849	0.000776904	5.18593	up	24.6981	57.7301	4.56012	1.97263	45.4644	143.559	3.15524	4.26939	4.60992	2.60708	35.4097	17.6788	5.20396	6.42692	3.81829	1.53677	4.73754	7.17366	2.54299	2.69224	2.20393	1.41915	3.31949	2.47172	Detected	Detected	Not Detected	Not Detected	Detected	Detected	Not Detected	Not Detected	Not Detected	Not Detected	Detected	Not Detected	0	A_23_P40527	A_23_P40527	NM_080646	NM_080646	NM_080646	Hs.173984	6899	TBX1
A_33_P3377564	0.0345259	0.00136859	5.18406	up	106.055	88.3682	7.19144	11.4711	101.213	484.365	15.0155	12.9204	23.6072	7.80744	60.6559	25.0767	6.89695	6.88763	4.41792	4.85072	5.83749	8.72525	4.65272	4.03326	4.15674	3.00774	4.47925	3.04176	Detected	Detected	Not Detected	Detected	Detected	Detected	Detected	Detected	Detected	Not Detected	Detected	Detected	0	A_33_P3377564	A_33_P3377564	NM_006150	NM_006150	NM_006150	Hs.732712	4007	PRICKLE3
A_23_P205724	0.0462529	0.0035097	5.17684	up	103.134	100.144	3.11329	5.22118	36.3799	32.3253	2.23479	10.0833	21.7318	5.78718	24.5602	8.49567	6.86662	7.02725	3.18148	3.80483	4.40238	5.27896	1.47424	3.67352	4.02661	2.68969	2.68773	1.7773	Detected	Detected	Not Detected	Not Detected	Detected	Detected	Not Detected	Not Detected	Detected	Not Detected	Detected	Not Detected	0	A_23_P205724	A_23_P205724	NM_017970	NM_017970	NM_017970	Hs.528131	55051	NRDE2
A_33_P3407657	0.0400959	0.00234369	5.16636	up	422.108	826.28	23.8666	113.242	569.319	212.418	13.8173	56.5968	156.329	31.1433	263.493	30.6513	8.54188	9.54589	6.08355	8.17042	8.15014	7.66211	4.52517	6.50577	7.00396	5.11508	7.36198	3.42715	Detected	Detected	Detected	Detected	Detected	Detected	Not Detected	Detected	Detected	Detected	Detected	Detected	0	A_33_P3407657	A_33_P3407657	NM_015246	NM_015246	NM_015246	Hs.526494	23295	MGRN1
A_33_P3218760	0.0280318	0.000383935	5.16425	up	3920.77	3852.63	462.158	1365.61	4144.17	4811.41	215.184	374.801	1152.58	134.137	1235.43	214.776	11.5784	11.6343	10.2143	11.3666	11.0654	12.0079	8.81016	9.49389	9.95046	7.93489	9.78741	7.67874	Detected	Detected	Detected	Detected	Detected	Detected	Detected	Detected	Detected	Detected	Detected	Detected	0	A_33_P3218760	A_33_P3218760	NM_080599	NM_080599	NM_080599	Hs.370689	26019	UPF2
A_33_P3402823	0.0284338	0.000433407	5.16118	up	692.109	641.428	44.3752	218.904	268.124	400.04	27.8621	73.9538	159.039	34.877	113.586	61.6615	9.17135	9.23575	6.98678	9.03965	7.11533	8.47137	5.66418	6.94471	7.02763	5.3313	5.83229	5.01391	Detected	Detected	Detected	Detected	Detected	Detected	Detected	Detected	Detected	Detected	Detected	Detected	0	A_33_P3402823	A_33_P3402823	NM_001010862	NM_001010862	NM_001010862	Hs.522672	169981	SPIN3
A_23_P3643	0.0300536	0.000657047	5.1598	up	50.23	54.2496	3.40904	12.0788	19.9302	18.325	3.16287	2.33963	15.0955	3.05441	17.6319	13.5737	6.03148	6.35883	3.33863	4.92833	3.5158	4.4614	2.54705	2.00746	3.47507	1.98735	2.26633	2.14732	Detected	Detected	Not Detected	Not Detected	Detected	Detected	Not Detected	Not Detected	Not Detected	Not Detected	Not Detected	Not Detected	0	A_23_P3643	A_23_P3643	NM_001374	NM_001374	NM_001374	Hs.103503	1775	DNASE1L2
A_33_P3364989	0.0241643	8.98e-05	5.15242	up	31.3141	56.4542	4.67335	9.61049	47.4727	58.2549	3.80502	7.42897	16.2845	4.87066	16.1531	20.01	5.48311	6.40066	3.85494	4.59748	4.79687	6.06431	2.81409	3.28316	3.58644	2.49965	2.16721	2.65532	Detected	Detected	Not Detected	Not Detected	Detected	Detected	Not Detected	Not Detected	Not Detected	Not Detected	Not Detected	Detected	0	A_33_P3364989	A_33_P3364989	NM_001024675	NM_001024675	NM_001024675	Hs.592151	170487	ACTL10
A_32_P107002	0.0313546	0.000818318	5.14644	up	1364.94	888.697	66.1877	261.427	1773.47	599.582	42.8603	85.261	334.15	35.1177	448.914	91.968	10.0728	9.64069	7.56093	9.27672	9.78697	9.01479	6.36077	7.18148	8.1339	5.34418	8.20374	5.94742	Detected	Detected	Detected	Detected	Detected	Detected	Detected	Detected	Detected	Detected	Detected	Detected	0	A_32_P107002	A_32_P107002	NM_032167	NM_032167	NM_032167	Hs.458401	92017	SNX29
A_23_P151093	0.0254975	0.000200627	5.13863	up	344.741	519.94	30.8471	103.455	333.846	333.167	14.5484	51.37	90.2387	32.596	125.84	57.626	8.28806	8.96036	6.45715	8.05248	7.41044	8.23614	4.60048	6.33701	6.19309	5.2031	6.04183	4.86081	Detected	Detected	Detected	Detected	Detected	Detected	Not Detected	Detected	Detected	Detected	Detected	Detected	0	A_23_P151093	A_23_P151093	NM_001040436	NM_001040436	NM_001040436	Hs.505231	51067	YARS2
A_23_P211973	0.0302846	0.000682384	5.1382	up	307.082	379.126	7.26806	126.013	190.189	21.8086	30.8668	19.1099	26.0293	17.0092	49.2502	36.4185	8.15059	8.56749	4.43198	8.30887	6.66585	4.71893	5.82783	4.67497	4.30631	4.05083	4.01256	3.80364	Detected	Detected	Not Detected	Detected	Detected	Detected	Detected	Detected	Detected	Detected	Detected	Detected	0	A_23_P211973	A_23_P211973	NM_024800	NM_024800	NM_024800	Hs.657336	79858	NEK11
A_23_P8139	0.0457751	0.00342154	5.13406	up	94.8727	84.8802	2.37417	23.9646	76.8623	38.7187	2.49015	10.8262	19.4518	5.74985	47.186	16.0463	6.77256	6.84287	2.28651	5.96695	5.47446	5.52576	2.14244	3.77447	3.85102	2.68319	3.91285	2.34454	Detected	Detected	Not Detected	Detected	Detected	Detected	Not Detected	Not Detected	Detected	Not Detected	Detected	Detected	0	A_23_P8139	A_23_P8139	NM_003427	NM_003427	NM_003427	Hs.388024	7629	ZNF76
A_33_P3315423	0.0250229	0.000161173	5.13328	up	296.289	362.374	32.78	84.3108	130.41	136.152	18.9616	32.7842	83.4448	19.9768	78.9447	39.7209	8.10936	8.51088	6.54802	7.7813	6.15851	7.10861	5.03024	5.57743	6.07779	4.3166	5.06158	3.99375	Detected	Detected	Detected	Detected	Detected	Detected	Detected	Detected	Detected	Detected	Detected	Detected	0	A_33_P3315423	A_33_P3315423	NM_018207	NM_018207	NM_018207	Hs.656006	55223	TRIM62
A_23_P106720	0.0217756	3.62e-05	5.13177	up	85.812	48.8457	17.3715	22.572	81.6668	50.3271	16.3543	10.3461	37.4566	5.9834	28.5764	20.2951	6.65914	6.25065	5.62981	5.87816	5.55964	5.879	4.79241	3.71016	4.86935	2.72362	2.92808	2.67603	Detected	Detected	Detected	Detected	Detected	Detected	Detected	Not Detected	Detected	Not Detected	Detected	Detected	0	A_23_P106720	A_23_P106720	NM_006453	NM_006453	NM_006453	Hs.513267	10607	TBL3
A_24_P372134	0.032572	0.00105342	5.12225	up	33.8578	15.688	9.17547	13.5992	163.428	95.8137	3.79189	15.895	37.3841	4.37312	30.9097	12.3421	5.57863	5.13074	4.74531	5.10169	6.45761	6.6721	2.80888	4.37269	4.86702	2.37827	3.06786	2.05069	Detected	Not Detected	Not Detected	Detected	Detected	Detected	Not Detected	Detected	Detected	Not Detected	Detected	Not Detected	0	A_24_P372134	A_24_P372134	NM_018295	NM_018295	NM_018295	Hs.521213	55281	TMEM140
A_33_P3335183	0.0430274	0.00284437	5.11625	up	6007.34	4933.33	152.877	288.175	5704.78	8781.77	154.273	309.749	965.547	122.27	1285.11	241.916	12.2112	11.9596	8.75058	9.41786	11.5805	12.9414	8.32921	9.2047	9.69423	7.76563	9.85835	7.87856	Detected	Detected	Detected	Detected	Detected	Detected	Detected	Detected	Detected	Detected	Detected	Detected	0	A_33_P3335183	A_33_P3335183	NM_001006607	NM_001006607	NM_001006607	Hs.646568	474170	LRRC37A2
A_24_P295806	0.0265471	0.000286093	5.11099	up	80.9891	123.944	34.9968	21.5348	229.737	167.088	8.56775	37.0757	73.0506	15.4255	61.3295	19.0193	6.59315	7.26777	6.64181	5.80679	6.9155	7.36003	3.82646	5.78681	5.87688	3.89383	4.50136	2.5781	Detected	Detected	Detected	Detected	Detected	Detected	Not Detected	Detected	Detected	Not Detected	Detected	Detected	0	A_24_P295806	A_24_P295806	NM_023947	NM_023947	NM_023947	Hs.144468	66005	CHID1
A_33_P3763846	0.0305623	0.000717725	5.10176	up	36.44	273.402	6.34543	9.30099	60.7813	58.2931	16.3113	10.0503	20.7989	6.26286	11.0334	20.7923	5.66266	8.16694	4.25731	4.55127	5.15403	6.06581	4.78726	3.66906	3.95253	2.7723	1.85328	2.71762	Detected	Detected	Not Detected	Not Detected	Detected	Detected	Detected	Detected	Detected	Not Detected	Not Detected	Detected	0	A_33_P3763846	A_33_P3763846	NM_001303252	NM_001303252	NM_001303252	Hs.432642	6300	MAPK12
A_32_P901770	0.0258353	0.000240702	5.08611	up	138.375	63.0273	4.21745	10.1052	29.9667	22.177	16.5111	2.34375	13.7958	3.22522	15.6537	18.2931	7.20537	6.52055	3.70284	4.66724	4.11133	4.74636	4.81086	2.00967	3.35122	2.04912	2.13349	2.51995	Detected	Detected	Not Detected	Not Detected	Detected	Detected	Detected	Not Detected	Not Detected	Not Detected	Not Detected	Detected	0	A_32_P901770	A_32_P901770	NM_031475	NM_031475	NM_031475	Hs.744222	83715	ESPN
A_24_P5550	0.0285545	0.000449759	5.07608	up	322.468	146.408	67.5409	63.8725	377.364	375.327	26.6324	47.3527	97.3642	26.2056	146.201	29.0261	8.20731	7.45312	7.58626	7.39377	7.57568	8.39156	5.59254	6.19982	6.30064	4.7962	6.33445	3.32174	Detected	Detected	Detected	Detected	Detected	Detected	Detected	Detected	Detected	Detected	Detected	Detected	0	A_24_P5550	A_24_P5550	NM_024297	NM_024297	NM_024297	Hs.644724	79142	PHF23
A_33_P3280700	0.0250229	0.000156268	5.07364	up	115.445	62.8602	13.0029	13.7134	128.939	123.462	8.48598	7.50791	37.4134	10.0232	55.4937	29.745	6.99177	6.51785	5.22427	5.11525	6.14437	6.98502	3.81295	3.29595	4.86792	3.29411	4.28004	3.36944	Detected	Detected	Not Detected	Detected	Detected	Detected	Not Detected	Not Detected	Detected	Not Detected	Detected	Detected	0	A_33_P3280700	A_33_P3280700	NM_024980	NM_024980	NM_024980	Hs.632367	80045	GPR157
A_23_P71270	0.0349475	0.00143876	5.0604	up	602.139	302.058	29.989	132.542	487.432	34.1105	15.6738	20.2025	84.6032	20.8506	139.596	63.54	8.99146	8.28492	6.41315	8.37488	7.93027	5.35234	4.72346	4.76819	6.0984	4.38741	6.25041	5.08365	Detected	Detected	Detected	Detected	Detected	Detected	Detected	Detected	Detected	Detected	Detected	Detected	0	A_23_P71270	A_23_P71270	NM_001185	NM_001185	NM_001185	Hs.546239	563	AZGP1
A_24_P287974	0.032572	0.00104748	5.05552	up	90.1214	350.772	10.8007	16.1859	127.199	66.0463	7.28318	18.3149	67.0476	7.62138	58.163	18.0495	6.7156	8.46414	4.97285	5.36801	6.12648	6.21694	3.61324	4.60821	5.75024	2.9819	4.38394	2.49934	Detected	Detected	Not Detected	Detected	Detected	Detected	Not Detected	Detected	Detected	Not Detected	Detected	Detected	0	A_24_P287974	A_24_P287974	NM_001292025	NM_001292025	NM_001292025	Hs.46679	404093	CUEDC1
A_23_P101013	0.0310303	0.000790117	5.05428	up	402.584	123.066	61.6333	51.6583	424.031	991.908	13.6059	47.5185	108.529	21.3037	204.833	66.1611	8.48009	7.25942	7.45643	7.10617	7.73313	9.70671	4.50161	6.20515	6.45785	4.4263	6.94558	5.18044	Detected	Detected	Detected	Detected	Detected	Detected	Not Detected	Detected	Detected	Detected	Detected	Detected	0	A_23_P101013	A_23_P101013	NM_007267	NM_007267	NM_007267	Hs.632227	11322	TMC6
A_33_P3229122	0.038077	0.00200973	5.04564	up	380.122	185.928	178.589	150.542	1328.33	1354.85	77.8107	201.195	119.956	37.8863	85.24	91.1943	8.4113	7.71889	8.95941	8.55021	9.34445	10.1202	7.29482	8.54791	6.61249	5.48704	5.22462	5.92738	Detected	Detected	Detected	Detected	Detected	Detected	Detected	Detected	Detected	Detected	Detected	Detected	0	A_33_P3229122	A_33_P3229122	NM_003522	NM_003522	NM_003522	Hs.182137	8343	HIST1H2BF
A_23_P116037	0.0405224	0.00240247	5.03296	up	99.3239	65.9048	3.5894	8.22373	75.4613	61.0803	3.92236	8.73807	33.7417	3.85991	39.3221	11.2448	6.82606	6.56778	3.42805	4.37974	5.44851	6.12432	2.85778	3.48854	4.70998	2.24261	3.51918	1.96794	Detected	Detected	Not Detected	Not Detected	Detected	Detected	Not Detected	Not Detected	Detected	Not Detected	Detected	Not Detected	0	A_23_P116037	A_23_P116037	NM_003273	NM_003273	NM_003273	Hs.31130	7108	TM7SF2
A_24_P359191	0.0366079	0.00176672	5.02616	up	1321.05	741.614	37.8493	159.518	3250.14	1322.03	46.5567	87.1393	238.899	53.3212	633.104	71.1817	10.0243	9.41452	6.75356	8.63211	10.6738	10.0877	6.49403	7.21941	7.63192	6.16487	8.74615	5.35293	Detected	Detected	Detected	Detected	Detected	Detected	Detected	Detected	Detected	Detected	Detected	Detected	0	A_24_P359191	A_24_P359191	NM_003043	NM_003043	NM_003043	Hs.529488	6533	SLC6A6
A_33_P3371954	0.0283053	0.000404643	5.02264	up	149.335	48.1889	9.07632	12.1436	208.549	96.9675	7.80909	17.7729	33.2807	7.31368	53.74	19.477	7.2988	6.23508	4.7306	4.93717	6.78804	6.6847	3.69937	4.55646	4.69019	2.93674	4.2091	2.61185	Detected	Detected	Not Detected	Detected	Detected	Detected	Not Detected	Detected	Detected	Not Detected	Detected	Detected	0	A_33_P3371954	A_33_P3371954	NM_052868	NM_052868	NM_052868	Hs.332012	93185	IGSF8
A_23_P53324	0.0234302	7.46e-05	5.02055	up	118.634	84.388	12.9738	25.2763	51.3742	36.0145	8.19772	9.83891	35.8824	11.3138	28.7803	23.1504	7.02548	6.83589	5.22114	6.05065	4.91183	5.4246	3.76645	3.63939	4.80366	3.45035	2.94178	2.90089	Detected	Detected	Detected	Detected	Detected	Detected	Not Detected	Not Detected	Detected	Not Detected	Detected	Detected	0	A_23_P53324	A_23_P53324	NM_024623	NM_024623	NM_024623	Hs.524817	79676	OGFOD2
A_23_P7313	0.0367824	0.00179992	5.0203	up	251.09	201.274	45.1051	209.409	5683.26	261.874	28.6767	43.6669	102.36	98.621	98.4842	102.128	7.91446	7.81619	7.00899	8.98262	11.5706	7.92109	5.70975	6.06121	6.37156	7.37817	5.53818	6.18845	Detected	Detected	Detected	Detected	Detected	Detected	Detected	Detected	Detected	Detected	Detected	Detected	0	A_23_P7313	A_23_P7313	NM_001040058	NM_001040058	NM_001040058	Hs.313	6696	SPP1
A_23_P43490	0.0285629	0.000455292	4.98683	up	108.276	158.319	186.698	168.352	203.405	458.098	28.6509	50.3485	116.966	22.3123	117.172	53.3706	6.92089	7.53887	9.02134	8.70586	6.75103	8.65023	5.70859	6.30424	6.57376	4.50787	5.8982	4.68683	Detected	Detected	Detected	Detected	Detected	Detected	Detected	Detected	Detected	Detected	Detected	Detected	0	A_23_P43490	A_23_P43490	NM_058197	NM_058197	NM_058197	Hs.512599	1029	CDKN2A
A_33_P3355724	0.0314567	0.000852394	4.97132	up	65.5179	139.474	5.84245	54.9123	36.1271	36.7078	7.88799	14.3737	22.3413	6.48484	44.2932	17.7749	6.34672	7.40007	4.15208	7.18905	4.39191	5.45047	3.71287	4.2081	4.07091	2.80716	3.77102	2.47848	Detected	Detected	Not Detected	Detected	Detected	Detected	Not Detected	Detected	Detected	Not Detected	Detected	Detected	0	A_33_P3355724	A_33_P3355724	ENST00000475047		AB096972	Hs.242520	89766	UMODL1
A_24_P70888	0.0365478	0.00176121	4.96669	up	1600.87	1814.53	101.72	352.62	2611.36	2106.08	81.1986	141.412	427.874	78.9576	1030.17	81.9947	10.2861	10.6115	8.16048	9.66136	10.3673	10.7703	7.36018	8.00868	8.49344	6.94831	9.48879	5.6839	Detected	Detected	Detected	Detected	Detected	Detected	Detected	Detected	Detected	Detected	Detected	Detected	0	A_24_P70888	A_24_P70888	NM_012401	NM_012401	NM_012401	Hs.3989	23654	PLXNB2
A_33_P3390284	0.0391744	0.00217465	4.96339	up	235.389	222.997	11.7612	34.3588	186.63	462.723	20.6987	34.0678	65.2664	15.331	80.0731	28.7781	7.84356	7.92884	5.0843	6.51369	6.63994	8.66361	5.17069	5.64231	5.71003	3.88232	5.09371	3.30691	Detected	Detected	Not Detected	Detected	Detected	Detected	Detected	Detected	Detected	Not Detected	Detected	Detected	0	A_33_P3390284	A_33_P3390284	NM_001166600	NM_001166600	NM_001166600	Hs.404706	159090	FAM122B
A_23_P403443	0.0250229	9.9e-05	4.95306	up	24.2276	30.6602	3.50352	19.4422	13.8081	45.0137	3.00604	3.22089	6.60081	9.98643	11.5363	15.9032	5.18179	5.77424	3.38626	5.65335	3.02497	5.73112	2.47627	2.38385	2.53558	3.28991	1.88259	2.33359	Detected	Detected	Not Detected	Detected	Not Detected	Detected	Not Detected	Not Detected	Not Detected	Not Detected	Not Detected	Detected	0	A_23_P403443	A_23_P403443	NM_173593	NM_173593	NM_173593	Hs.504416	283358	B4GALNT3
A_23_P157715	0.0385357	0.00206942	4.95221	up	178.749	173.108	14.7155	10.9268	153.074	409.736	30.4719	35.7566	49.9795	7.03226	48.6449	19.7246	7.51285	7.64036	5.39237	4.78332	6.36712	8.50043	5.80654	5.72477	5.30924	2.89428	3.98104	2.63216	Detected	Detected	Not Detected	Not Detected	Detected	Detected	Detected	Detected	Detected	Not Detected	Detected	Detected	0	A_23_P157715	A_23_P157715	NM_032902	NM_032902	NM_032902	Hs.521937	84988	PPP1R16A
A_33_P3223577	0.0267948	0.000330995	4.94835	up	25.5851	34.7901	2.72248	3.71888	26.7474	29.8644	2.40554	2.2115	5.74023	3.66711	17.6209	11.3118	5.24483	5.89936	2.9306	3.35232	3.94437	5.1689	1.97202	1.8936	2.40923	2.18527	2.26564	1.97294	Detected	Detected	Not Detected	Not Detected	Detected	Detected	Not Detected	Not Detected	Not Detected	Not Detected	Not Detected	Not Detected	0	A_33_P3223577	A_33_P3223577	THC2515563
A_24_P944427	0.0258475	0.000249482	4.94145	up	343.509	469.648	58.9753	56.7072	557.925	501.36	23.8173	60.3372	75.2523	34.149	261.185	44.053	8.28414	8.82749	7.39503	7.23047	8.12208	8.775	5.40683	6.61273	5.92247	5.29037	7.34564	4.22656	Detected	Detected	Detected	Detected	Detected	Detected	Detected	Detected	Detected	Detected	Detected	Detected	0	A_24_P944427	A_24_P944427	NM_001292043	NM_001292043	NM_001292043	Hs.288164	55209	SETD5
A_23_P201066	0.0460897	0.00348525	4.94132	up	157.491	441.463	4.45831	37.4252	109.027	501.627	21.9611	29.7218	38.7723	15.2318	57.406	32.9661	7.35665	8.75601	3.78573	6.63401	5.93304	8.77566	5.27122	5.41453	4.92342	3.87157	4.35471	3.57628	Detected	Detected	Not Detected	Detected	Detected	Detected	Detected	Detected	Detected	Detected	Detected	Detected	0	A_23_P201066	A_23_P201066	NM_001037175	NM_001037175	NM_001037175	Hs.497841	55061	SUSD4
A_23_P259797	0.0299502	0.000647276	4.93944	up	50.1673	152.507	7.87533	22.0186	75.3797	42.438	8.07025	5.77078	38.3307	11.1756	28.393	26.9401	6.03048	7.49695	4.53442	5.84286	5.44761	5.65521	3.74359	3.00219	4.9056	3.43318	2.91751	3.17938	Detected	Detected	Not Detected	Detected	Detected	Detected	Not Detected	Not Detected	Detected	Not Detected	Detected	Detected	0	A_23_P259797	A_23_P259797	NM_174917	NM_174917	NM_174917	Hs.461727	197322	ACSF3
A_23_P6398	0.0250229	0.000141298	4.93431	up	71.6598	65.0365	17.2602	13.286	221.564	94.3593	10.4307	19.1398	47.2653	3.96277	59.4277	20.4521	6.45208	6.55404	5.61838	5.06714	6.86905	6.65195	4.10022	4.67813	5.22627	2.27011	4.43246	2.68837	Detected	Detected	Detected	Detected	Detected	Detected	Not Detected	Detected	Detected	Not Detected	Detected	Detected	0	A_23_P6398	A_23_P6398	NM_001127	NM_001127	NM_001127	Hs.368794	162	AP1B1
A_23_P73526	0.030849	0.000768814	4.93214	up	181.191	116.785	4.73536	15.5015	65.941	5.22012	6.86977	4.92759	9.8445	8.29399	36.1795	17.9555	7.52866	7.20185	3.87157	5.29973	5.26726	2.88073	3.53857	2.83837	2.93036	3.07523	3.36081	2.49319	Detected	Detected	Not Detected	Detected	Detected	Not Detected	Not Detected	Not Detected	Not Detected	Not Detected	Detected	Detected	0	A_23_P73526	A_23_P73526	NM_004143	NM_004143	NM_004143	Hs.40403	4435	CITED1
A_33_P3266410	0.0306081	0.000721994	4.92343	up	561.811	211.462	46.3367	153.221	657.772	599.437	38.2617	87.0562	104.872	29.5351	173.506	49.6064	8.90166	7.86765	7.05065	8.57384	8.3604	9.01449	6.17846	7.21789	6.40754	5.0147	6.64688	4.50524	Detected	Detected	Detected	Detected	Detected	Detected	Detected	Detected	Detected	Detected	Detected	Detected	0	A_33_P3266410	A_33_P3266410	NM_002383	NM_002383	NM_002383	Hs.23650	4150	MAZ
A_23_P101699	0.0254975	0.000195326	4.92036	up	313.878	443.33	210.916	164.984	598.007	637.116	71.9579	74.4125	228.548	29.9339	165.354	62.0331	8.17551	8.7602	9.19877	8.67702	8.21896	9.09492	7.17782	6.95353	7.57117	5.03907	6.56316	5.02801	Detected	Detected	Detected	Detected	Detected	Detected	Detected	Detected	Detected	Detected	Detected	Detected	0	A_23_P101699	A_23_P101699	NM_032631	NM_032631	NM_032631	Hs.43071	84717	HDGFRP2
A_33_P3287529	0.0254975	0.000216471	4.918	up	414.221	304.45	60.1309	102.129	708.72	176.611	21.1077	50.8134	163.422	26.9012	215.318	38.0966	8.5175	8.29359	7.42204	8.03471	8.45486	7.43165	5.20419	6.31913	7.06989	4.84344	7.03249	3.89679	Detected	Detected	Detected	Detected	Detected	Detected	Detected	Detected	Detected	Detected	Detected	Detected	0	A_33_P3287529	A_33_P3287529	NM_016176	NM_016176	NM_016176	Hs.42806	51150	SDF4
A_21_P0013605	0.0236517	8.45e-05	4.89948	up	49.5355	45.3125	6.00548	6.47614	65.5249	23.7668	5.00945	5.1808	20.0623	2.80474	21.7833	18.1377	6.0166	6.1706	4.18757	4.0666	5.25819	4.84639	3.17103	2.89095	3.8985	1.79777	2.52478	2.50715	Detected	Detected	Not Detected	Not Detected	Detected	Detected	Not Detected	Not Detected	Detected	Not Detected	Not Detected	Not Detected	0	A_21_P0013605	A_21_P0013605	NM_001291815	NM_001291815	NM_001291815		256158	HMCN2
A_33_P3349776	0.0293226	0.000559584	4.89664	up	210.986	212.594	15.203	51.1827	146.451	106.902	17.4674	33.4229	64.304	12.248	68.9882	23.8703	7.71018	7.87388	5.43961	7.09277	6.30684	6.80588	4.90244	5.60873	5.68927	3.55808	4.76479	2.95512	Detected	Detected	Detected	Detected	Detected	Detected	Detected	Detected	Detected	Not Detected	Detected	Detected	0	A_33_P3349776	A_33_P3349776	NM_144703	NM_144703	NM_144703	Hs.105379	149986	LSM14B
A_33_P3321034	0.0347203	0.00140986	4.89253	up	449.273	503.741	81.783	83.291	596.729	737.335	26.4196	98.4966	189.146	22.819	339.723	45.7767	8.62301	8.91857	7.85465	7.76591	8.21543	9.29725	5.57844	7.43099	7.28805	4.54808	7.76635	4.31944	Detected	Detected	Detected	Detected	Detected	Detected	Detected	Detected	Detected	Detected	Detected	Detected	0	A_33_P3321034	A_33_P3321034	NM_020911	NM_020911	NM_020911	Hs.511454	91584	PLXNA4
A_23_P369654	0.0358576	0.00165209	4.8867	up	43.264	16.9118	217.819	29.5929	57.2746	62.1548	8.59726	31.2609	27.1854	30.2884	27.4625	17.2568	5.8587	5.19963	9.24089	6.29121	5.06853	6.14363	3.83139	5.49887	4.37446	5.06201	2.86312	2.43958	Detected	Detected	Detected	Detected	Detected	Detected	Not Detected	Detected	Detected	Detected	Detected	Detected	0	A_23_P369654	A_23_P369654	AB023170		AB023170		22979	EFR3B
A_23_P130488	0.0265471	0.000296336	4.87627	up	142.093	35.4617	7.40505	8.57203	61.3923	21.491	3.60816	9.53873	22.6709	5.56405	26.6377	15.7041	7.23924	5.91908	4.45644	4.43898	5.1692	4.69987	2.73834	3.5995	4.0941	2.64681	2.81232	2.31706	Detected	Detected	Not Detected	Not Detected	Detected	Detected	Not Detected	Not Detected	Detected	Not Detected	Detected	Not Detected	0	A_23_P130488	A_23_P130488	NM_000400	NM_000400	NM_000400	Hs.487294	2068	ERCC2
A_21_P0014038	0.0299502	0.000647312	4.87465	up	547.423	400.772	64.4371	48.514	938.512	610.385	42.8202	56.7117	177.436	21.4105	298.326	42.5336	8.86539	8.63544	7.52213	7.01349	8.83824	9.04045	6.35917	6.50941	7.19347	4.43508	7.55533	4.1509	Detected	Detected	Detected	Detected	Detected	Detected	Detected	Detected	Detected	Detected	Detected	Detected	0	A_21_P0014038	A_21_P0014038	NM_001142641	NM_001142641	NM_001142641	Hs.411138	57666	FBRSL1
A_23_P341065	0.0357836	0.00164184	4.86766	up	697.049	392.468	62.6641	72.4822	537.848	789.347	27.9662	63.1709	213.467	25.7372	280.198	50.513	9.18074	8.6146	7.48251	7.56728	8.06523	9.39202	5.67015	6.68863	7.46763	4.76248	7.46109	4.55304	Detected	Detected	Detected	Detected	Detected	Detected	Detected	Detected	Detected	Detected	Detected	Detected	0	A_23_P341065	A_23_P341065	NM_031454	NM_031454	NM_031454	Hs.365405	83642	SELO
A_24_P251661	0.037027	0.00183066	4.8671	up	98.8507	329.925	15.4502	27.7181	188.876	1157.03	11.6991	35.6212	71.1867	18.281	81.5191	51.811	6.81968	8.38832	5.46259	6.19077	6.65561	9.91866	4.26755	5.71856	5.83683	4.16784	5.13225	4.61424	Detected	Detected	Detected	Detected	Detected	Detected	Not Detected	Detected	Detected	Detected	Detected	Detected	0	A_24_P251661	A_24_P251661	NM_171828	NM_171828	NM_171828	Hs.591285	27094	KCNMB3
A_32_P169574	0.0356126	0.0015848	4.86623	up	403.634	637.267	23.523	46.4482	726.825	350.089	18.4515	64.4197	124.324	27.0615	207.353	33.6721	8.48508	9.22485	6.06316	6.94723	8.49187	8.30219	4.9874	6.72378	6.66354	4.85322	6.96646	3.62315	Detected	Detected	Detected	Detected	Detected	Detected	Detected	Detected	Detected	Detected	Detected	Detected	0	A_32_P169574	A_32_P169574	NM_017602	NM_017602	NM_017602	Hs.496098	55593	OTUD5
A_23_P11980	0.0250229	0.00010843	4.85741	up	91.4466	184.419	7.13423	15.5251	69.8799	47.6261	12.9162	12.4615	20.1944	3.94698	32.8098	37.6558	6.73343	7.70908	4.40912	5.30209	5.34666	5.80626	4.4187	3.98226	3.90905	2.26607	3.17788	3.87157	Detected	Detected	Not Detected	Detected	Detected	Detected	Not Detected	Not Detected	Detected	Not Detected	Detected	Detected	0	A_23_P11980	A_23_P11980	NM_001195831	NM_001195831	NM_001195831	Hs.527565	149465	CFAP57
A_23_P154801	0.0334426	0.00115605	4.84354	up	190.401	172.991	16.8571	34.3352	361.85	133.895	15.2705	30.7327	94.5476	13.8642	98.2172	19.2327	7.58651	7.63967	5.58568	6.51294	7.51655	7.08789	4.68222	5.47203	6.25665	3.73495	5.53185	2.59516	Detected	Detected	Detected	Detected	Detected	Detected	Detected	Detected	Detected	Not Detected	Detected	Detected	0	A_23_P154801	A_23_P154801	NM_015638	NM_015638	NM_015638	Hs.168073	26133	TRPC4AP
A_23_P143692	0.0250229	0.000165	4.83909	up	95.1768	47.7413	31.7125	10.5777	129.822	355.768	9.68019	17.7427	42.2951	8.60958	61.3637	37.0925	6.7763	6.22518	6.50153	4.73508	6.15221	8.32223	3.99741	4.55272	5.05608	3.11464	4.50239	3.84086	Detected	Detected	Detected	Detected	Detected	Detected	Not Detected	Detected	Detected	Not Detected	Detected	Detected	0	A_23_P143692	A_23_P143692	NM_018957	NM_018957	NM_018957	Hs.601143	23616	SH3BP1
A_23_P133956	0.0304134	0.000691928	4.83887	up	90.3381	17.7174	14.9726	7.64727	173.741	179.206	4.30408	14.8233	37.6829	7.78983	41.4209	27.9392	6.71891	5.2454	5.41665	4.28342	6.54182	7.44952	2.98423	4.25919	4.87804	3.00462	3.63178	3.24984	Detected	Not Detected	Detected	Not Detected	Detected	Detected	Not Detected	Detected	Detected	Not Detected	Detected	Detected	0	A_23_P133956	A_23_P133956	NM_002263	NM_002263	NM_002263	Hs.436912	3833	KIFC1
A_23_P113317	0.0460414	0.0034742	4.83436	up	161.049	104.979	2.5948	4.22881	108.607	26.9071	5.88562	6.25639	23.788	4.63818	26.0958	15.5255	7.38183	7.07882	2.84133	3.53602	5.92769	5.01824	3.35488	3.09039	4.16823	2.44677	2.7798	2.3039	Detected	Detected	Not Detected	Not Detected	Detected	Detected	Not Detected	Not Detected	Detected	Not Detected	Detected	Not Detected	0	A_23_P113317	A_23_P113317	NM_177938	NM_177938	NM_177938	Hs.654944	54681	P4HTM
A_24_P309645	0.0391565	0.00216383	4.805	up	169.354	311.666	13.1387	24.7926	182.356	81.2457	11.5305	17.0816	93.6562	12.9171	89.9737	18.8555	7.44676	8.32092	5.2385	6.0194	6.60838	6.47307	4.24444	4.48816	6.24463	3.6319	5.3456	2.56508	Detected	Detected	Detected	Detected	Detected	Detected	Not Detected	Detected	Detected	Not Detected	Detected	Detected	0	A_24_P309645	A_24_P309645	NM_017901	NM_017901	NM_017901	Hs.524763	53373	TPCN1
A_23_P56673	0.0367824	0.00179877	4.79633	up	106.773	84.4	12.155	7.03092	143.569	128.091	4.16727	14.9961	43.7905	11.8167	63.1803	16.5513	6.90545	6.83601	5.12942	4.16992	6.28204	7.03336	2.93965	4.27753	5.10942	3.50683	4.5638	2.38739	Detected	Detected	Detected	Not Detected	Detected	Detected	Not Detected	Detected	Detected	Not Detected	Detected	Detected	0	A_23_P56673	A_23_P56673	NM_031288	NM_031288	NM_031288	Hs.410786	83444	INO80B
A_33_P3291831	0.0344409	0.00135386	4.79486	up	128.299	9.94181	17.4237	24.0116	95.0274	396.681	3.33878	16.6981	15.9801	28.6215	54.7788	44.2652	7.11588	4.71867	5.63495	5.9696	5.7582	8.45834	2.62705	4.45025	3.56094	4.95646	4.25223	4.23977	Detected	Not Detected	Detected	Detected	Detected	Detected	Not Detected	Detected	Detected	Detected	Detected	Detected	0	A_33_P3291831	A_33_P3291831	NM_018131	NM_018131	NM_018131	Hs.14559	55165	CEP55
A_24_P9346	0.0250229	0.000111388	4.7891	up	989.081	1018.33	92.8661	110.085	1855.69	555.025	59.4479	94.1671	210.329	49.399	406.582	62.9935	9.62939	9.81752	8.02639	8.13237	9.84801	8.90746	6.87995	7.3539	7.44449	6.01085	8.051	5.06242	Detected	Detected	Detected	Detected	Detected	Detected	Detected	Detected	Detected	Detected	Detected	Detected	0	A_24_P9346	A_24_P9346	NM_006772	NM_006772	NM_006772	Hs.586264	8831	SYNGAP1
A_23_P41390	0.0341528	0.00130201	4.78592	up	169.097	105.8	19.4173	31.0085	701.509	78.7332	11.7637	35.9571	93.625	8.52655	168.51	12.4501	7.44449	7.08834	5.78917	6.36455	8.44219	6.4349	4.27585	5.73416	6.24384	3.10291	6.59643	2.05767	Detected	Detected	Detected	Detected	Detected	Detected	Not Detected	Detected	Detected	Not Detected	Detected	Not Detected	0	A_23_P41390	A_23_P41390	NM_018986	NM_018986	NM_018986	Hs.479116	54436	SH3TC1
A_33_P3821660	0.0299502	0.000643442	4.76487	up	473.096	287.781	24.0997	37.9326	227.598	551.003	29.5845	30.3747	70.7754	33.901	88.8432	45.7923	8.68487	8.22848	6.09675	6.65366	6.90286	8.8991	5.7582	5.45122	5.82791	5.27714	5.31596	4.32066	Detected	Detected	Detected	Detected	Detected	Detected	Detected	Detected	Detected	Detected	Detected	Detected	0	A_33_P3821660	A_33_P3821660	NM_001173989	NM_001173989	NM_001173989	Hs.370555	55684	RABL6
A_24_P148590	0.0250229	0.000161237	4.76432	up	133.402	170.561	24.5393	45.8997	120.048	134.797	19.51	25.8766	45.698	15.743	76.5094	26.1742	7.16025	7.62476	6.12194	6.93048	6.05439	7.09687	5.07587	5.18624	5.17526	3.92356	4.98942	3.12473	Detected	Detected	Detected	Detected	Detected	Detected	Detected	Detected	Detected	Detected	Detected	Detected	0	A_24_P148590	A_24_P148590	NM_015727	NM_015727	NM_015727	Hs.633301	6869	TACR1
A_33_P3227231	0.0350092	0.00147546	4.76177	up	114.143	19.4157	4.07221	7.62108	54.4586	46.0414	2.63174	5.52659	20.0357	7.23845	34.6094	13.499	6.97695	5.3313	3.64505	4.27826	4.99357	5.76268	2.28092	2.95943	3.89661	2.92435	3.27625	2.14124	Detected	Detected	Not Detected	Not Detected	Detected	Detected	Not Detected	Not Detected	Detected	Not Detected	Detected	Not Detected	0	A_33_P3227231	A_33_P3227231	ENST00000481817		AK303492	Hs.490512	155060	LOC155060
A_23_P37877	0.0306081	0.000725248	4.75379	up	70.2334	35.2385	4.20199	9.93232	86.5836	49.1769	7.20872	8.43816	27.0624	4.83611	24.7349	12.5768	6.42923	5.91228	3.69661	4.64354	5.63374	5.84854	3.5987	3.44347	4.36777	2.49259	2.69803	2.0689	Detected	Detected	Not Detected	Not Detected	Detected	Detected	Not Detected	Not Detected	Detected	Not Detected	Detected	Not Detected	0	A_23_P37877	A_23_P37877	NM_022493	NM_022493	NM_022493	Hs.513247	64428	NARFL
A_33_P3336822	0.0433094	0.00290959	4.74198	up	580.54	732.253	857.769	286.207	30932.7	2258.61	216.051	75.5233	638.283	162.925	474.842	454.188	8.94308	9.39236	11.0001	9.40721	14.2056	10.8736	8.81537	6.9805	9.07756	8.2753	8.29259	8.90769	Detected	Detected	Detected	Detected	Detected	Detected	Detected	Detected	Detected	Detected	Detected	Detected	0	A_33_P3336822	A_33_P3336822	ENST00000390297		U09907	Hs.561078
A_23_P127652	0.0374252	0.00188444	4.74028	up	1017.79	831.676	64.925	175.148	337.081	694.515	36.9068	38.3377	177.708	41.9301	364.506	92.3602	9.67083	9.55452	7.53245	8.75996	7.42281	9.21389	6.11776	5.84468	7.19683	5.68583	7.88069	5.95882	Detected	Detected	Detected	Detected	Detected	Detected	Detected	Detected	Detected	Detected	Detected	Detected	0	A_23_P127652	A_23_P127652	NM_003455	NM_003455	NM_003455	Hs.112556	7753	ZNF202
A_23_P3312	0.0265471	0.000301823	4.73207	up	12163.5	7027.08	5087.44	8502.69	9040.5	969.801	672.406	602.259	3460.82	647.485	683.742	774.681	13.2046	12.4603	13.168	13.6336	12.3064	9.66918	10.3927	10.18	11.5083	10.3284	8.87023	9.70741	Detected	Detected	Detected	Detected	Detected	Detected	Detected	Detected	Detected	Detected	Detected	Detected	0	A_23_P3312	A_23_P3312	NM_005545	NM_005545	NM_005545	Hs.745166	3671	ISLR
A_33_P3360684	0.0266244	0.000310611	4.72839	up	106.064	94.1322	23.3507	38.2698	170.796	154.158	14.9307	27.9309	66.0913	12.1237	62.9667	26.0811	6.89707	6.95732	6.0515	6.66652	6.51691	7.26109	4.64272	5.31022	5.72875	3.5449	4.55638	3.11933	Detected	Detected	Detected	Detected	Detected	Detected	Detected	Detected	Detected	Not Detected	Detected	Detected	0	A_33_P3360684	A_33_P3360684	NM_001018070	NM_001018070	NM_001018070	Hs.6191	57175	CORO1B
A_23_P160240	0.0477102	0.0038378	4.72644	up	174.488	286.956	5.46856	26.4896	123.496	79.6921	5.54187	27.1023	62.883	17.9292	47.9084	20.5749	7.48053	8.22502	4.0635	6.12512	6.0896	6.44988	3.2876	5.26049	5.65708	4.13804	3.94614	2.69977	Detected	Detected	Not Detected	Detected	Detected	Detected	Not Detected	Detected	Detected	Detected	Detected	Detected	0	A_23_P160240	A_23_P160240	NM_016361	NM_016361	NM_016361	Hs.562154	51205	ACP6
A_23_P118815	0.021928	3.98e-05	4.72246	up	102.726	79.3249	54.8351	41.7876	105.443	136.24	23.4902	20.9423	65.311	12.312	50.1193	35.3494	6.86182	6.76524	7.28718	6.79633	5.89035	7.10969	5.38058	4.83163	5.71116	3.56632	4.05245	3.73123	Detected	Detected	Detected	Detected	Detected	Detected	Detected	Detected	Detected	Not Detected	Detected	Detected	0	A_23_P118815	A_23_P118815	NM_001012271	NM_001012271	NM_001012271	Hs.744872	332	BIRC5
A_24_P253818	0.0314567	0.000851419	4.72163	up	26.2717	18.6075	2.25279	4.77915	67.8996	18.649	2.45704	2.68638	5.70731	2.62888	21.0076	5.09205	5.27538	5.2921	1.51578	3.69684	5.30648	4.49054	2.08728	2.16747	2.40308	1.45191	2.47769	1.55399	Detected	Detected	Not Detected	Not Detected	Detected	Detected	Not Detected	Not Detected	Not Detected	Not Detected	Detected	Not Detected	0	A_24_P253818	A_24_P253818	NM_004475	NM_004475	NM_004475	Hs.514038	2319	FLOT2
A_24_P60845	0.0245075	9.19e-05	4.70916	up	230.57	257.84	44.0305	50.8132	93.0753	48.4875	19.3023	17.6086	59.2243	16.6323	63.788	46.5909	7.81791	8.10095	6.97553	7.08287	5.73103	5.83075	5.05904	4.53928	5.56692	4.01481	4.58397	4.3622	Detected	Detected	Detected	Detected	Detected	Detected	Detected	Detected	Detected	Detected	Detected	Detected	0	A_24_P60845	A_24_P60845	NM_000665	NM_000665	NM_000665	Hs.154495	43	ACHE
A_24_P381136	0.0308269	0.000746119	4.70445	up	59.4102	71.2276	4.56463	6.56798	38.9292	107.691	7.41594	3.72577	21.891	3.57651	28.7995	29.971	6.2305	6.64978	3.81922	4.08417	4.50401	6.81683	3.63566	2.54244	4.03867	2.15656	2.94239	3.38464	Detected	Detected	Not Detected	Not Detected	Detected	Detected	Not Detected	Not Detected	Detected	Not Detected	Detected	Detected	0	A_24_P381136	A_24_P381136	NM_016223	NM_016223	NM_016223	Hs.334639	29763	PACSIN3
A_23_P326157	0.0250229	0.000168545	4.70381	up	143.799	26.755	13.4898	24.4436	42.6178	178.321	21.8687	8.52759	24.8474	12.6402	33.1106	25.6371	7.25316	5.63745	5.27392	5.9967	4.64281	7.44293	5.26413	3.45849	4.23689	3.60343	3.19361	3.08744	Detected	Detected	Detected	Detected	Detected	Detected	Detected	Not Detected	Detected	Not Detected	Detected	Detected	0	A_23_P326157	A_23_P326157	NM_022134	NM_022134	NM_022134	Hs.632556	64090	GAL3ST2
A_23_P141142	0.0298709	0.000639604	4.70116	up	1009.92	2329.88	163.067	465.217	574.9	1763.34	142.034	95.9229	342.667	52.3342	290.283	178.614	9.65898	10.9661	8.83466	10.0061	8.16479	10.5081	8.20638	7.3852	8.17079	6.12728	7.51584	7.33513	Detected	Detected	Detected	Detected	Detected	Detected	Detected	Detected	Detected	Detected	Detected	Detected	0	A_23_P141142	A_23_P141142	ENST00000524722	XM_005257728	XM_005257728	Hs.252739	84074	QRICH2
A_23_P342138	0.0215502	1.27e-05	4.69962	up	224.22	175.068	107.648	123.457	89.0622	99.0834	31.8295	40.2305	67.148	29.5507	47.8374	48.0676	7.78418	7.65271	8.2415	8.28019	5.67211	6.71204	5.87745	5.92557	5.75187	5.01554	3.94241	4.43464	Detected	Detected	Detected	Detected	Detected	Detected	Detected	Detected	Detected	Detected	Detected	Detected	0	A_23_P342138	A_23_P342138	NM_001040272	NM_001040272	NM_001040272	Hs.741483	92949	ADAMTSL1
A_23_P207507	0.0335302	0.00120248	4.68438	up	297.034	74.3512	12.7848	7.69003	130.988	226.951	12.6488	20.2786	33.0911	12.2589	58.0765	25.3454	8.11177	6.69733	5.19893	4.29066	6.16471	7.75041	4.38557	4.77409	4.68228	3.55944	4.38106	3.06424	Detected	Detected	Detected	Not Detected	Detected	Detected	Detected	Detected	Detected	Not Detected	Detected	Detected	0	A_23_P207507	A_23_P207507	NM_003786	NM_003786	NM_003786	Hs.463421	8714	ABCC3
A_33_P3323448	0.0355365	0.00156978	4.67975	up	177.708	142.897	15.1863	12.1364	389.489	132.617	3.58363	17.7002	56.0558	15.6227	131.583	36.887	7.50436	7.42514	5.43789	4.93593	7.61489	7.07552	2.72942	4.54815	5.48429	3.91258	6.13167	3.82902	Detected	Detected	Detected	Not Detected	Detected	Detected	Not Detected	Detected	Detected	Detected	Detected	Detected	0	A_33_P3323448	A_33_P3323448	NM_178582	NM_178582	NM_178582	Hs.373741	81502	HM13
A_33_P3211520	0.0293226	0.000542419	4.67768	up	221.732	183.236	14.6083	40.0365	189.272	107.626	7.79879	25.0019	61.1254	23.9708	69.3076	37.3324	7.76834	7.70299	5.38205	6.73129	6.65902	6.81536	3.69846	5.12581	5.61574	4.63609	4.77446	3.85374	Detected	Detected	Detected	Detected	Detected	Detected	Not Detected	Detected	Detected	Detected	Detected	Detected	0	A_33_P3211520	A_33_P3211520	NM_053052	NM_053052	NM_053052	Hs.325081	116841	SNAP47
A_23_P134008	0.0330134	0.00110051	4.67644	up	501.122	579.357	54.1855	112.887	471.593	1015.79	23.4922	48.6	152.685	61.9596	242.709	68.3556	8.7544	9.09434	7.27143	8.16619	7.88256	9.74095	5.38087	6.245	6.97182	6.46645	7.23417	5.25911	Detected	Detected	Detected	Detected	Detected	Detected	Detected	Detected	Detected	Detected	Detected	Detected	0	A_23_P134008	A_23_P134008	ENST00000472914		BC005991	Hs.143410	85015	USP45
A_24_P193582	0.0265471	0.000306673	4.66019	up	393.079	519.39	42.6616	67.1952	488.495	185.866	21.6015	45.4006	144.917	27.3071	167.431	43.3017	8.45203	8.95889	6.92892	7.45948	7.93318	7.49917	5.24277	6.12803	6.89466	4.87004	6.5856	4.18823	Detected	Detected	Detected	Detected	Detected	Detected	Detected	Detected	Detected	Detected	Detected	Detected	0	A_24_P193582	A_24_P193582	NM_017702	NM_017702	NM_017702	Hs.62771	54849	DEF8
A_21_P0012120	0.0250229	0.000176899	4.64259	up	60.4496	425.619	45.4336	43.9202	199.014	28.0549	18.6568	24.0527	46.164	14.037	48.269	47.2247	6.25204	8.70907	7.02093	6.86961	6.72296	5.08049	5.00422	5.06328	5.1899	3.75256	3.96212	4.39341	Detected	Detected	Detected	Detected	Detected	Detected	Detected	Detected	Detected	Not Detected	Detected	Detected	0	A_21_P0012120	A_21_P0012120	NM_001164431	NM_001164431	NM_001164431	Hs.451997	343578	ARHGAP40
A_24_P3804	0.0267944	0.000317843	4.63664	up	281.575	110.838	13.2142	21.4179	165.542	183.105	14.4236	20.0708	46.4002	15.1779	63.5869	38.5463	8.04861	7.14034	5.2459	5.79979	6.47566	7.47672	4.58806	4.75674	5.19738	3.86569	4.57772	3.92297	Detected	Detected	Detected	Detected	Detected	Detected	Detected	Detected	Detected	Detected	Detected	Detected	0	A_24_P3804	A_24_P3804	NM_001039651	NM_001039651	NM_001039651	Hs.371225	401251	SAPCD1
A_21_P0007959	0.0430865	0.00286217	4.62647	up	1185.67	1557.13	50.3162	588.369	632.488	533.751	58.8487	64.4371	265.434	52.8178	392.489	99.067	9.88073	10.3963	7.1661	10.3016	8.30527	8.85211	6.86415	6.7244	7.79265	6.14519	7.99867	6.11759	Detected	Detected	Detected	Detected	Detected	Detected	Detected	Detected	Detected	Detected	Detected	Detected	0	A_21_P0007959	A_21_P0007959	lnc-FARP1-1:1			Hs.594160		lnc-FARP1-1
A_33_P3349774	0.0333857	0.00113601	4.62611	up	79.692	51.5419	3.9941	7.13623	59.5746	33.5662	5.22796	11.9943	29.0287	2.59822	32.0815	7.49652	6.57369	6.30476	3.61144	4.18996	5.12654	5.33	3.21888	3.92669	4.4775	1.41006	3.13847	1.70599	Detected	Detected	Not Detected	Not Detected	Detected	Detected	Not Detected	Detected	Detected	Not Detected	Detected	Not Detected	0	A_33_P3349774	A_33_P3349774	NM_144703	NM_144703	NM_144703	Hs.105379	149986	LSM14B
A_23_P125408	0.0265471	0.000300379	4.62371	up	231.607	311.745	37.9161	64.9725	121.165	409.492	28.8988	27.4337	89.7048	29.2663	76.1768	48.7079	7.82223	8.3216	6.75609	7.4149	6.06601	8.49954	5.72075	5.28009	6.18407	4.99661	4.97991	4.46462	Detected	Detected	Detected	Detected	Detected	Detected	Detected	Detected	Detected	Detected	Detected	Detected	0	A_23_P125408	A_23_P125408	NM_031304	NM_031304	NM_031304	Hs.515064	83475	DOHH
A_24_P415327	0.035678	0.00160031	4.62261	up	292.004	228.743	27.2983	24.8604	423.624	398.89	23.13	43.7516	100.688	21.3666	112.988	28.3453	8.09132	7.95714	6.27852	6.02296	7.73207	8.46752	5.35568	6.06416	6.34681	4.4313	5.82145	3.2779	Detected	Detected	Detected	Detected	Detected	Detected	Detected	Detected	Detected	Detected	Detected	Detected	0	A_24_P415327	A_24_P415327	NM_000195	NM_000195	NM_000195	Hs.404568	3257	HPS1
A_33_P3417667	0.0397848	0.00227809	4.61881	up	232.456	82.7541	8.9821	30.6823	160.024	172.737	11.0066	15.9887	45.5053	7.2294	129.526	32.5129	7.82752	6.81536	4.71494	6.34766	6.42894	7.40558	4.17449	4.38203	5.16914	2.92276	6.10048	3.54599	Detected	Detected	Not Detected	Detected	Detected	Detected	Not Detected	Detected	Detected	Not Detected	Detected	Detected	0	A_33_P3417667	A_33_P3417667	AK055900		AK055900	Hs.675872	147276	C18orf15
A_23_P82249	0.030849	0.000767011	4.60766	up	61.8406	30.1403	7.15031	5.21313	65.1889	51.2146	3.15307	5.71484	25.3772	9.76271	23.6966	17.7036	6.27799	5.75682	4.41153	3.80271	5.24954	5.89927	2.54244	2.99226	4.26838	3.2593	2.6381	2.47317	Detected	Detected	Not Detected	Not Detected	Detected	Detected	Not Detected	Not Detected	Detected	Not Detected	Detected	Detected	0	A_23_P82249	A_23_P82249	NM_007188	NM_007188	NM_007188	Hs.647118	11194	ABCB8
A_24_P21715	0.0215502	2.41e-05	4.60728	up	65.0712	42.3681	16.4585	18.9636	58.415	37.2368	8.93272	12.8492	29.9557	6.26894	33.1651	18.5888	6.33832	6.10293	5.55198	5.61289	5.09662	5.47139	3.88226	4.02612	4.52562	2.77385	3.19657	2.5462	Detected	Detected	Detected	Detected	Detected	Detected	Not Detected	Detected	Detected	Not Detected	Detected	Detected	0	A_24_P21715	A_24_P21715	NM_004584	NM_004584	NM_004584	Hs.655354	5883	RAD9A
A_33_P3260062	0.0311486	0.000798422	4.60724	up	45.6667	52.772	5.36248	15.3939	110.868	277.432	7.47397	12.0919	30.1154	6.48826	40.8984	35.9631	5.92482	6.32854	4.03723	5.28833	5.95518	7.99202	3.64505	3.93804	4.5345	2.80758	3.6032	3.77432	Detected	Detected	Not Detected	Detected	Detected	Detected	Not Detected	Detected	Detected	Not Detected	Detected	Detected	0	A_33_P3260062	A_33_P3260062	ENST00000262971		AK022481	Hs.105779	51588	PIAS4
A_33_P3301932	0.0250229	0.00011011	4.60661	up	49.1192	39.5965	19.0939	9.76096	57.0933	12.5983	2.79785	5.69257	21.1768	5.55175	29.0411	27.9456	6.00719	6.03223	5.76658	4.61865	5.06353	3.92965	2.37393	2.98947	3.98132	2.64401	2.95651	3.25035	Detected	Detected	Detected	Not Detected	Detected	Not Detected	Not Detected	Not Detected	Detected	Not Detected	Detected	Detected	0	A_33_P3301932	A_33_P3301932	CB993317		CB993317	Hs.580861
A_21_P0012549	0.034266	0.00133254	4.60023	up	91.1965	86.7652	8.32525	25.1755	200.377	91.3451	8.52108	13.6587	60.5423	9.10283	69.6922	22.83	6.73037	6.86662	4.61059	6.04368	6.73231	6.61017	3.81896	4.12396	5.59976	3.1776	4.78669	2.87653	Detected	Detected	Not Detected	Detected	Detected	Detected	Not Detected	Detected	Detected	Not Detected	Detected	Detected	0	A_21_P0012549	A_21_P0012549	ENST00000507238			Hs.652423	132241	RPL32P3
A_33_P3262043	0.0392457	0.00218304	4.59098	up	169.976	81.5961	4.21534	23.0749	45.7617	22.2716	8.06251	7.17271	28.1208	3.74983	44.9002	21.1283	7.45113	6.80026	3.70184	5.90938	4.74781	4.75211	3.74274	3.24316	4.42749	2.20977	3.80168	2.74489	Detected	Detected	Not Detected	Detected	Detected	Detected	Not Detected	Not Detected	Detected	Not Detected	Detected	Detected	0	A_33_P3262043	A_33_P3262043	NM_004322	NM_004322	NM_004322	Hs.370254	572	BAD
A_23_P104689	0.0369642	0.00182655	4.58866	up	96.5812	46.9246	468.245	50.2423	145.351	106.065	18.2119	56.3329	70.9654	53.5515	42.6531	25.238	6.79542	6.20624	10.239	7.0653	6.29777	6.79735	4.96556	6.49659	5.83179	6.17392	3.6889	3.05591	Detected	Detected	Detected	Detected	Detected	Detected	Detected	Detected	Detected	Detected	Detected	Detected	0	A_23_P104689	A_23_P104689	NM_021975	NM_021975	NM_021975	Hs.502875	5970	RELA
A_23_P253068	0.0481858	0.00395441	4.58782	up	166.817	211.215	6.25738	25.2554	185.244	172.448	19.6892	18.0731	65.3931	6.16976	81.9355	26.4529	7.42603	7.86652	4.23918	6.04975	6.63058	7.40293	5.09017	4.58531	5.7131	2.75366	5.14315	3.14276	Detected	Detected	Not Detected	Detected	Detected	Detected	Detected	Detected	Detected	Not Detected	Detected	Detected	0	A_23_P253068	A_23_P253068	NM_013366	NM_013366	NM_013366	Hs.533262	29882	ANAPC2
A_23_P392962	0.0327931	0.00107068	4.58319	up	199.397	434.421	41.2727	136.514	225.946	131.088	37.1109	50.8831	118.238	12.5099	107.029	41.7048	7.64233	8.73213	6.88036	8.41782	6.89365	7.06088	6.1262	6.32137	6.5919	3.5892	5.7124	4.108	Detected	Detected	Detected	Detected	Detected	Detected	Detected	Detected	Detected	Not Detected	Detected	Detected	0	A_23_P392962	A_23_P392962	NM_006613	NM_006613	NM_006613	Hs.567416	10750	GRAP
A_33_P3276455	0.0304218	0.000703552	4.58307	up	852.334	646.001	84.5955	282.041	721.974	171.96	40.3385	66.0711	181.815	32.3952	434.319	62.8101	9.42835	9.24474	7.89878	9.38503	8.48081	7.39863	6.26365	6.76208	7.22856	5.19148	8.15581	5.05688	Detected	Detected	Detected	Detected	Detected	Detected	Detected	Detected	Detected	Detected	Detected	Detected	0	A_33_P3276455	A_33_P3276455	NM_006618	NM_006618	NM_006618	Hs.443650	10765	KDM5B
A_23_P11984	0.0250229	0.00011828	4.58266	up	352.193	1330.77	51.5177	137.765	362.372	348.618	39.9317	54.1063	103.437	44.8986	133.962	83.3071	8.31604	10.1825	7.19773	8.42965	7.51819	8.29834	6.24602	6.42556	6.38751	5.81774	6.1671	5.7214	Detected	Detected	Detected	Detected	Detected	Detected	Detected	Detected	Detected	Detected	Detected	Detected	0	A_23_P11984	A_23_P11984	NM_201649	NM_201649	NM_201649	Hs.442590	6536	SLC6A9
A_23_P501985	0.0319607	0.000964844	4.57371	up	687.475	901.167	17.9001	63.7469	1099.27	239.839	25.9773	54.6444	106.62	35.1649	192.968	61.741	9.16227	9.66102	5.67626	7.39003	9.08188	7.81587	5.54929	6.44123	6.43213	5.34753	6.83982	5.01715	Detected	Detected	Detected	Detected	Detected	Detected	Detected	Detected	Detected	Detected	Detected	Detected	0	A_23_P501985	A_23_P501985	NM_172249	NM_172249	NM_172249	Hs.520937	1438	CSF2RA
A_24_P205120	0.0265471	0.00030706	4.56752	up	39.1738	69.3277	8.39751	3.66972	64.1667	23.1941	2.72657	6.80388	25.4784	3.90128	29.9991	13.5229	5.74321	6.61967	4.62144	3.33216	5.23015	4.80902	2.33831	3.18225	4.27391	2.25413	3.01542	2.14316	Detected	Detected	Not Detected	Not Detected	Detected	Detected	Not Detected	Not Detected	Detected	Not Detected	Detected	Not Detected	0	A_24_P205120	A_24_P205120	NM_199367	NM_199367	NM_199367	Hs.185597	6687	SPG7
A_23_P316064	0.034266	0.00132296	4.55714	up	134.183	99.0041	8.46673	17.4665	112.08	84.6575	6.22319	16.7233	48.7421	14.2567	50.1604	20.4052	7.16637	7.01336	4.63369	5.49053	5.97006	6.51755	3.42035	4.45294	5.27446	3.776	4.05381	2.68523	Detected	Detected	Not Detected	Detected	Detected	Detected	Not Detected	Detected	Detected	Not Detected	Detected	Detected	0	A_23_P316064	A_23_P316064	NM_180990	NM_180990	NM_180990	Hs.714919	353174	ZACN
A_24_P379353	0.0315704	0.000885589	4.55387	up	96.9467	185.215	8.02061	15.2149	156.009	68.414	6.50164	12.5613	41.8534	15.1719	44.6096	34.9831	6.80006	7.71337	4.55802	5.2704	6.39192	6.25843	3.47342	3.99459	5.04026	3.86522	3.7878	3.70837	Detected	Detected	Not Detected	Detected	Detected	Detected	Not Detected	Detected	Detected	Not Detected	Detected	Detected	0	A_24_P379353	A_24_P379353	NM_152499	NM_152499	NM_152499	Hs.632394	149473	CCDC24
A_23_P404045	0.0475519	0.00379658	4.55106	up	1163.73	1197.71	55.6319	101.412	2418.22	514.924	34.6564	94.6293	444.42	41.2719	777.401	50.2985	9.85622	10.0411	7.3078	8.02528	10.2471	8.80731	6.01106	7.36219	8.54323	5.65435	9.05684	4.53995	Detected	Detected	Detected	Detected	Detected	Detected	Detected	Detected	Detected	Detected	Detected	Detected	0	A_23_P404045	A_23_P404045	NM_005957	NM_005957	NM_005957	Hs.214142	4524	MTHFR
A_33_P3288805	0.0332599	0.00112163	4.55007	up	211.778	222.878	23.3394	44.5365	314.238	335.259	15.2959	32.202	98.5507	26.1096	120.326	35.7032	7.71551	7.92759	6.05056	6.88973	7.33218	8.24574	4.68587	5.54708	6.31838	4.78836	5.95055	3.75575	Detected	Detected	Detected	Detected	Detected	Detected	Detected	Detected	Detected	Detected	Detected	Detected	0	A_33_P3288805	A_33_P3288805	NM_001134774	NM_001134774	NM_001134774	Hs.280792	64837	KLC2
A_33_P3614348	0.0291191	0.000519961	4.54244	up	58.0325	109.952	6.44278	20.8756	45.6443	65.6585	11.2554	14.0595	29.6861	4.64393	31.1561	21.8353	6.20106	7.13139	4.27744	5.76198	4.74436	6.21023	4.20761	4.17326	4.51236	2.44852	3.08343	2.80047	Detected	Detected	Not Detected	Detected	Detected	Detected	Not Detected	Detected	Detected	Not Detected	Detected	Detected	0	A_33_P3614348	A_33_P3614348	AK096660		AK096660	Hs.646764	728868	LOC728868
A_33_P3317731	0.0289652	0.000489686	4.53766	up	90.7536	97.2938	16.634	46.5948	25.5683	13.6654	8.16012	8.86453	28.1152	9.47567	34.6247	22.6976	6.72357	6.99336	5.56831	6.95227	3.87688	4.04055	3.75906	3.50624	4.4271	3.22607	3.27778	2.86701	Detected	Detected	Detected	Detected	Detected	Detected	Not Detected	Not Detected	Detected	Not Detected	Detected	Detected	0	A_33_P3317731	A_33_P3317731	AK130876		AK130876	Hs.592188
A_33_P3337604	0.0284338	0.000420705	4.53055	up	88.0397	66.4347	7.22834	15.0741	56.2986	37.6757	4.97822	8.24047	29.042	6.24534	43.0207	22.7165	6.68755	6.57654	4.42538	5.25443	5.0436	5.48657	3.16319	3.41142	4.47827	2.76879	3.70561	2.86867	Detected	Detected	Not Detected	Detected	Detected	Detected	Not Detected	Not Detected	Detected	Not Detected	Detected	Detected	0	A_33_P3337604	A_33_P3337604	ENST00000554611		AB209749	Hs.25121	10858	CYP46A1
A_24_P231057	0.0304218	0.000705366	4.53023	up	1684.22	1855.11	80.1196	268.467	1345.68	590.726	58.7293	148.227	336.65	66.1052	418.733	80.3521	10.3575	10.6472	7.82433	9.3089	9.36355	8.98665	6.86079	8.07728	8.14422	6.59373	8.10049	5.63409	Detected	Detected	Detected	Detected	Detected	Detected	Detected	Detected	Detected	Detected	Detected	Detected	0	A_24_P231057	A_24_P231057	NM_148894	NM_148894	NM_148894	Hs.744935	259282	BOD1L1
A_24_P224966	0.0250229	0.000117892	4.52383	up	44.934	35.3073	81.4205	20.1221	44.8794	30.1221	16.7117	16.3546	20.9915	16.1707	24.3794	16.0176	5.90381	5.91468	7.84824	5.70732	4.71691	5.17992	4.83129	4.4177	3.96816	3.96894	2.67651	2.34301	Detected	Detected	Detected	Detected	Detected	Detected	Detected	Detected	Detected	Detected	Detected	Not Detected	0	A_24_P224966	A_24_P224966	NM_000085	NM_000085	NM_000085	Hs.352243	1188	CLCNKB
A_24_P165545	0.021928	4.42e-05	4.51639	up	622.767	370.215	155.583	346.029	505.99	403.266	43.0634	37.2398	125.993	73.2844	253.966	114.495	9.03531	8.53921	8.77469	9.63553	7.98086	8.48151	6.36799	5.79605	6.68354	6.8058	7.30558	6.43714	Detected	Detected	Detected	Detected	Detected	Detected	Detected	Detected	Detected	Detected	Detected	Detected	0	A_24_P165545	A_24_P165545	NM_153254	NM_153254	NM_153254	Hs.454835	254173	TTLL10
A_23_P113553	0.030849	0.000776534	4.51597	up	31.3857	34.6183	3.27795	25.6313	24.1246	6.21216	2.78855	2.67313	9.46297	4.71849	20.5876	14.064	5.48547	5.89376	3.27149	6.07143	3.78911	3.05873	2.36828	2.1616	2.887	2.46581	2.4528	2.18427	Detected	Detected	Not Detected	Detected	Detected	Not Detected	Not Detected	Not Detected	Not Detected	Not Detected	Not Detected	Not Detected	0	A_23_P113553	A_23_P113553	NM_001011544	NM_001011544	NM_001011544	Hs.670252	4110	MAGEA11
A_23_P127793	0.0344409	0.00135708	4.51445	up	246.12	278.336	20.7853	53.4405	403.719	285.347	27.1295	33.0606	109.892	20.3177	128.305	33.9337	7.89152	8.18841	5.88565	7.14857	7.66433	8.02776	5.62156	5.59142	6.47566	4.34702	6.08297	3.64029	Detected	Detected	Detected	Detected	Detected	Detected	Detected	Detected	Detected	Detected	Detected	Detected	0	A_23_P127793	A_23_P127793	NM_153265	NM_153265	NM_153265	Hs.379785	256364	EML3
A_23_P170088	0.0341482	0.00129647	4.50965	up	38.4257	30.6675	3.00683	4.17638	20.9774	34.5656	2.40973	3.64719	16.7926	2.88413	15.3116	10.645	5.72222	5.77451	3.11913	3.52065	3.59195	5.36994	1.98242	2.52036	3.62915	1.8933	2.11156	1.92352	Detected	Detected	Not Detected	Not Detected	Detected	Detected	Not Detected	Not Detected	Detected	Not Detected	Not Detected	Not Detected	0	A_23_P170088	A_23_P170088	NR_104599	NR_104599	NR_104599	Hs.495553	54932	EXD3
A_33_P3303066	0.0315704	0.000889335	4.50101	up	241.711	129.238	28.2102	71.1836	190.004	371.612	25.783	38.7111	86.3916	22.7319	84.7981	36.2679	7.87291	7.31353	6.327	7.54106	6.66451	8.37642	5.53746	5.86054	6.12874	4.54071	5.21284	3.79365	Detected	Detected	Detected	Detected	Detected	Detected	Detected	Detected	Detected	Detected	Detected	Detected	0	A_33_P3303066	A_33_P3303066	NM_017797	NM_017797	NM_017797	Hs.465543	55643	BTBD2
A_23_P16683	0.0434099	0.00293379	4.49817	up	594.548	326.744	64.6752	54.0738	734.786	852.569	29.5345	56.6818	273.648	24.6768	346.424	48.5423	8.97608	8.376	7.52682	7.1658	8.50541	9.50301	5.75446	6.5085	7.8348	4.68442	7.79816	4.45676	Detected	Detected	Detected	Detected	Detected	Detected	Detected	Detected	Detected	Detected	Detected	Detected	0	A_23_P16683	A_23_P16683	NM_017722	NM_017722	NM_017722	Hs.515169	55621	TRMT1
A_23_P25945	0.035678	0.0016024	4.49397	up	260.89	123.045	10.7789	27.5614	195.438	105.342	7.84539	20.6905	63.311	13.7883	87.778	34.1627	7.95805	7.25898	4.96956	6.18243	6.70057	6.78848	3.70504	4.80992	5.66534	3.72658	5.28839	3.65485	Detected	Detected	Not Detected	Detected	Detected	Detected	Not Detected	Detected	Detected	Not Detected	Detected	Detected	0	A_23_P25945	A_23_P25945	NM_020421	NM_020421	NM_020421	Hs.413208	57143	ADCK1
A_23_P141917	0.0335099	0.00118525	4.49266	up	278.314	189.358	61.2036	32.8385	398.593	217.144	39.7016	45.7747	176.174	6.87819	154.326	26.3293	8.03297	7.73963	7.44666	6.45021	7.64595	7.68995	6.23722	6.14191	7.1829	2.86867	6.43464	3.13462	Detected	Detected	Detected	Detected	Detected	Detected	Detected	Detected	Detected	Not Detected	Detected	Detected	0	A_23_P141917	A_23_P141917	NM_003331	NM_003331	NM_003331	Hs.75516	7297	TYK2
A_23_P30799	0.0314567	0.000847832	4.48954	up	575.589	228.534	212.797	348.634	1583.3	1377.8	74.4081	192.851	171.97	59.894	171.296	124.151	8.93235	7.95596	9.21209	9.6448	9.60866	10.1416	7.22713	8.48794	7.1471	6.39686	6.62553	6.61148	Detected	Detected	Detected	Detected	Detected	Detected	Detected	Detected	Detected	Detected	Detected	Detected	0	A_23_P30799	A_23_P30799	NM_021018	NM_021018	NM_021018	Hs.247814	8968	HIST1H3F
A_23_P214681	0.0477102	0.00384217	4.48384	up	582.153	404.858	62.945	114.035	1374.33	609.28	25.1012	75.1519	187.689	59.1887	738.589	33.2953	8.94813	8.64716	7.48883	8.17802	9.39391	9.03678	5.49362	6.97232	7.27596	6.37395	8.99091	3.59766	Detected	Detected	Detected	Detected	Detected	Detected	Detected	Detected	Detected	Detected	Detected	Detected	0	A_23_P214681	A_23_P214681	NM_006238	NM_006238	NM_006238	Hs.696032	5467	PPARD
A_23_P46309	0.0265471	0.000288673	4.47958	up	29.7522	42.1306	9.46969	3.22151	88.2242	57.1296	3.33602	23.3155	14.0978	3.60842	29.91	11.3556	5.42465	6.09747	4.78968	3.14177	5.65981	6.03907	2.62562	5.01307	3.38109	2.166	3.01016	1.97632	Detected	Detected	Not Detected	Not Detected	Detected	Detected	Not Detected	Detected	Not Detected	Not Detected	Detected	Not Detected	0	A_23_P46309	A_23_P46309	NM_001048199	NM_001048199	NM_001048199	Hs.469723	1104	RCC1
A_23_P350451	0.0284338	0.000414127	4.46821	up	703.089	320.781	98.2598	116.588	3284	372.685	22.9996	80.259	305.388	39.2088	508.615	79.0755	9.19196	8.35206	8.11089	8.20429	10.6923	8.38043	5.34694	7.07908	7.99736	5.55342	8.40231	5.59466	Detected	Detected	Detected	Detected	Detected	Detected	Detected	Detected	Detected	Detected	Detected	Detected	0	A_23_P350451	A_23_P350451	NM_001198	NM_001198	NM_001198	Hs.436023	639	PRDM1
A_24_P316257	0.0324392	0.00101971	4.45934	up	342.53	1096.92	20.3643	74.6917	240.152	1263.72	33.0676	48.2377	76.2406	33.304	131.439	104.902	8.28183	9.91866	5.85602	7.60751	6.97039	10.0341	5.93505	6.23222	5.9424	5.24375	6.1297	6.24435	Detected	Detected	Detected	Detected	Detected	Detected	Detected	Detected	Detected	Detected	Detected	Detected	0	A_24_P316257	A_24_P316257	NM_176677	NM_176677	NM_176677	Hs.664267	283948	NHLRC4
A_24_P59667	0.0315704	0.000888526	4.453	up	106.225	159.922	16.6436	77.7166	263.107	91.2793	11.1148	28.9785	75.8478	11.6286	95.047	39.9996	6.89901	7.54951	5.56886	7.66433	7.08963	6.60919	4.18921	5.37155	5.93379	3.48631	5.46093	4.01008	Detected	Detected	Detected	Detected	Detected	Detected	Not Detected	Detected	Detected	Not Detected	Detected	Detected	0	A_24_P59667	A_24_P59667	NM_000215	NM_000215	NM_000215	Hs.515247	3718	JAK3
A_33_P3411925	0.0315704	0.000886133	4.44775	up	184.121	94.2161	16.0685	34.4085	224.163	156.89	17.264	35.4183	64.7733	10.6763	73.7706	27.4693	7.54618	6.95859	5.51912	6.51599	6.88347	7.28244	4.88356	5.70828	5.69949	3.37109	4.90723	3.21769	Detected	Detected	Detected	Detected	Detected	Detected	Detected	Detected	Detected	Not Detected	Detected	Detected	0	A_33_P3411925	A_33_P3411925	NM_024100	NM_024100	NM_024100	Hs.325321	57418	WDR18
A_24_P289170	0.0299743	0.000652617	4.43684	up	340.743	344.926	15.775	27.2552	646.801	171.003	31.9051	48.9894	84.5616	12.465	80.7973	44.8348	8.2753	8.44404	5.49307	6.16648	8.33292	7.39066	5.88158	6.26144	6.09765	3.58317	5.11215	4.26928	Detected	Detected	Detected	Detected	Detected	Detected	Detected	Detected	Detected	Not Detected	Detected	Detected	0	A_24_P289170	A_24_P289170	NM_001080414	NM_001080414	NM_001080414	Hs.525536	440193	CCDC88C
A_24_P450285	0.0440583	0.00307799	4.43247	up	238.324	420.539	9.17302	19.3659	112.946	17.958	28.7688	9.25782	35.9624	9.21792	31.2576	41.5188	7.85553	8.69397	4.74491	5.64688	5.97825	4.43213	5.714	3.56076	4.80766	3.1931	3.08948	4.09801	Detected	Detected	Not Detected	Detected	Detected	Detected	Detected	Not Detected	Detected	Not Detected	Detected	Detected	0	A_24_P450285	A_24_P450285	NM_001145018	NM_001145018	NM_001145018	Hs.114777	283152	CCDC153
A_23_P319423	0.021928	4.41e-05	4.42986	up	246.633	158.895	23.1343	16.0109	101.415	53.4647	20.8463	20.2792	41.7054	8.41681	60.8607	26.8187	7.89444	7.5432	6.0372	5.3514	5.83993	5.95562	5.18233	4.77416	5.03504	3.08948	4.48652	3.17069	Detected	Detected	Detected	Detected	Detected	Detected	Detected	Detected	Detected	Not Detected	Detected	Detected	0	A_23_P319423	A_23_P319423	NM_003740	NM_003740	NM_003740	Hs.444448	8645	KCNK5
A_23_P82412	0.0328032	0.00107494	4.4277	up	4309.49	2266.7	131.041	268.27	2239.75	2646.48	106.557	241.464	524.839	95.5607	621.384	186.508	11.7149	10.9315	8.52756	9.30836	10.1301	11.1071	7.77572	8.82967	8.78225	7.31852	8.71697	7.417	Detected	Detected	Detected	Detected	Detected	Detected	Detected	Detected	Detected	Detected	Detected	Detected	0	A_23_P82412	A_23_P82412	NM_148956	NM_148956	NM_148956	Hs.647060	55695	NSUN5
A_33_P3339531	0.0253171	0.000187861	4.42294	up	47.0605	45.1267	5.05224	4.73052	60.2777	41.9865	12.5018	6.52228	15.1941	3.38465	16.8214	16.5684	5.9592	6.16683	3.96045	3.68354	5.1426	5.64045	4.36739	3.13402	3.48496	2.09673	2.21078	2.38914	Detected	Detected	Not Detected	Not Detected	Detected	Detected	Detected	Not Detected	Detected	Not Detected	Not Detected	Detected	0	A_33_P3339531	A_33_P3339531	NM_138481	NM_138481	NM_138481	Hs.344488	150356	CHADL
A_23_P128663	0.021928	4.21e-05	4.4122	up	89.4992	408.743	30.1781	62.9469	98.4586	139.566	26.2108	40.4014	19.341	31.018	63.3475	44.2763	6.70647	8.65994	6.42369	7.37323	5.80403	7.1392	5.5646	5.93304	3.84152	5.10816	4.56964	4.2406	Detected	Detected	Detected	Detected	Detected	Detected	Detected	Detected	Detected	Detected	Detected	Detected	0	A_23_P128663	A_23_P128663	NM_014363	NM_014363	NM_014363	Hs.159492	26278	SACS
A_33_P3299719	0.029219	0.00053645	4.41044	up	222.728	103.572	14.3064	45.1606	99.3261	33	11.6426	10.9479	46.9601	15.0973	63.8802	34.401	7.77545	7.064	5.35448	6.90863	5.81434	5.30862	4.25866	3.79115	5.21648	3.85644	4.58741	3.66984	Detected	Detected	Detected	Detected	Detected	Detected	Not Detected	Not Detected	Detected	Not Detected	Detected	Detected	0	A_33_P3299719	A_33_P3299719	ENST00000329335		AK127545		94137	RP1L1
A_33_P3418175	0.0349735	0.00146451	4.40807	up	46.2074	40.2624	2.9685	3.93626	34.8607	103.091	2.84281	9.18404	14.8135	3.10502	26.0233	19.2427	5.93842	6.04911	3.09319	3.43384	4.33652	6.7619	2.39395	3.54951	3.44874	2.0089	2.77513	2.59586	Detected	Detected	Not Detected	Not Detected	Detected	Detected	Not Detected	Not Detected	Detected	Not Detected	Detected	Detected	0	A_33_P3418175	A_33_P3418175	NM_177458	NM_177458	NM_177458	Hs.158665	66004	LYNX1
A_33_P3248664	0.0354749	0.00155937	4.40526	up	1183.16	310.483	46.5112	144.177	352.374	1315.91	56.9951	49.9186	157.499	30.3104	233.256	99.0112	9.8765	8.31544	7.05611	8.48947	7.48267	10.083	6.8148	6.29236	7.01601	5.06392	7.16438	6.11635	Detected	Detected	Detected	Detected	Detected	Detected	Detected	Detected	Detected	Detected	Detected	Detected	0	A_33_P3248664	A_33_P3248664	NM_006295	NM_006295	NM_006295	Hs.520026	7407	VARS
A_23_P121506	0.0466334	0.00359428	4.40371	up	80.7026	87.6461	5.60519	3.32302	128.117	76.4954	8.45572	11.5741	28.7172	9.41196	34.9136	9.03605	6.5882	6.87834	4.09672	3.19376	6.13602	6.40018	3.80748	3.87015	4.46036	3.21863	3.29217	1.81211	Detected	Detected	Not Detected	Not Detected	Detected	Detected	Not Detected	Not Detected	Detected	Not Detected	Detected	Not Detected	0	A_23_P121506	A_23_P121506	NM_003704	NM_003704	NM_003704	Hs.652364	8603	FAM193A
A_33_P3293858	0.0391744	0.00216928	4.40127	up	35.9194	39.3817	2.30559	12.7224	14.0265	21.2889	2.93484	2.28446	5.87232	5.29094	18.6143	6.24084	5.64522	6.02626	1.81274	5.00503	3.04458	4.6858	2.44184	1.97334	2.42866	2.59357	2.33182	1.62288	Detected	Detected	Not Detected	Detected	Not Detected	Detected	Not Detected	Not Detected	Not Detected	Not Detected	Not Detected	Not Detected	0	A_33_P3293858	A_33_P3293858	NM_001033602	NM_001033602	NM_001033602	Hs.22287	23281	MTUS2
A_23_P382188	0.0471714	0.00370057	4.39436	up	76.1056	101.372	31.1399	31.3885	235.97	553.621	15.4842	33.2677	63.7324	30.9333	96.4807	22.7991	6.51589	7.03996	6.47256	6.38282	6.94988	8.90508	4.70495	5.60146	5.67575	5.10294	5.493	2.87418	Detected	Detected	Detected	Detected	Detected	Detected	Detected	Detected	Detected	Detected	Detected	Detected	0	A_23_P382188	A_23_P382188	NM_001013841	NM_001013841	NM_001013841	Hs.194385	55620	STAP2
A_23_P352870	0.033508	0.00118127	4.38596	up	67.2097	37.0497	15.2086	10.085	331.312	80.4245	3.50789	16.6889	39.1583	9.77377	133.124	11.7618	6.37789	5.96519	5.4401	4.66422	7.39945	6.46069	2.69784	4.44932	4.93864	3.26118	6.15528	2.00793	Detected	Detected	Not Detected	Not Detected	Detected	Detected	Not Detected	Detected	Detected	Not Detected	Detected	Not Detected	0	A_23_P352870	A_23_P352870	NM_002856	NM_002856	NM_002856	Hs.655455	5819	PVRL2
A_23_P98282	0.0225501	6.47e-05	4.38149	up	87.7038	76.7503	27.305	31.1325	81.38	152.321	15.1305	11.8347	46.4183	14.4896	57.6459	42.338	6.6847	6.72995	6.27923	6.37032	5.55409	7.24562	4.667	3.90582	5.19801	3.79967	4.36389	4.141	Detected	Detected	Detected	Detected	Detected	Detected	Detected	Not Detected	Detected	Not Detected	Detected	Detected	0	A_23_P98282	A_23_P98282	NM_006946	NM_006946	NM_006946	Hs.26915	6712	SPTBN2
A_33_P3416583	0.0291764	0.000533228	4.37987	up	867.679	455.627	72.4223	64.6139	523.918	524.928	22.033	58.1551	178.425	31.8043	233.612	96.3252	9.4514	8.78812	7.68628	7.4078	8.02639	8.83357	5.27692	6.55188	7.20264	5.15637	7.16752	6.05289	Detected	Detected	Detected	Detected	Detected	Detected	Detected	Detected	Detected	Detected	Detected	Detected	0	A_33_P3416583	A_33_P3416583	NM_001135190	NM_001135190	NM_001135190	Hs.503165	116985	ARAP1
A_23_P301942	0.0344409	0.00135813	4.37318	up	1368.28	1457.33	52.4679	240.787	1278.78	881.054	102.169	80.1774	229.392	63.7246	508.333	77.0228	10.0772	10.3041	7.22388	9.16167	9.29023	9.53791	7.7123	7.07745	7.57486	6.52257	8.40165	5.53411	Detected	Detected	Detected	Detected	Detected	Detected	Detected	Detected	Detected	Detected	Detected	Detected	0	A_23_P301942	A_23_P301942	NM_024409	NM_024409	NM_024409	Hs.627236	4880	NPPC
A_24_P12998	0.0432767	0.00290323	4.37042	up	126.901	47.6654	8.87655	4.13621	159.982	103.9	8.23082	8.65229	66.2197	2.74558	71.0334	17.6482	7.10137	6.22308	4.69766	3.50675	6.42812	6.7712	3.77053	3.47658	5.73193	1.68567	4.82804	2.46879	Detected	Detected	Not Detected	Not Detected	Detected	Detected	Not Detected	Not Detected	Detected	Not Detected	Detected	Detected	0	A_24_P12998	A_24_P12998	NM_173197	NM_173197	NM_173197	Hs.97044	30819	KCNIP2
A_24_P257971	0.0258475	0.000262182	4.3626	up	23.474	25.4608	5.21064	3.9882	79.2036	90.3507	7.11726	9.00352	12.3136	3.05064	24.7273	18.6117	5.14349	5.58477	3.99824	3.45386	5.5183	6.59599	3.58288	3.52585	3.20352	1.98612	2.69762	2.54752	Detected	Detected	Not Detected	Not Detected	Detected	Detected	Not Detected	Not Detected	Not Detected	Not Detected	Detected	Detected	0	A_24_P257971	A_24_P257971	NM_005094	NM_005094	NM_005094	Hs.656699	10999	SLC27A4
A_23_P142856	0.0355502	0.0015769	4.36117	up	67.6149	58.2882	2.8225	18.2719	26.6804	27.1016	4.91431	4.62418	19.2787	5.03653	16.7799	25.7503	6.38418	6.43667	2.99675	5.55943	3.94039	5.02892	3.14685	2.77241	3.83673	2.53824	2.20864	3.09517	Detected	Detected	Not Detected	Detected	Detected	Detected	Not Detected	Not Detected	Detected	Not Detected	Not Detected	Detected	0	A_23_P142856	A_23_P142856	NM_198998	NM_198998	NM_198998	Hs.534650	375318	AQP12A
A_21_P0011419	0.0359691	0.00166289	4.35764	up	1524.53	803.145	86.0248	211.203	735.887	1019.06	67.4923	96.1579	331.22	52.1995	372.049	77.4698	10.2243	9.50881	7.91946	8.99605	8.5084	9.74519	7.07196	7.38863	8.11712	6.12236	7.91264	5.5482	Detected	Detected	Detected	Detected	Detected	Detected	Detected	Detected	Detected	Detected	Detected	Detected	0	A_21_P0011419	A_21_P0011419	NM_000296	NM_000296	NM_000296	Hs.75813	5310	PKD1
A_33_P3374210	0.0356256	0.00158885	4.35649	up	689.783	105.213	46.0655	179.392	499.939	3987.5	31.9871	71.1456	66.4522	78.4904	170.935	146.798	9.16744	7.08165	7.04111	8.78812	7.96426	11.7207	5.88424	6.88774	5.73715	6.93809	6.62172	6.95532	Detected	Detected	Detected	Detected	Detected	Detected	Detected	Detected	Detected	Detected	Detected	Detected	0	A_33_P3374210	A_33_P3374210	NM_002417	NM_002417	NM_002417	Hs.80976	4288	MKI67
A_23_P67913	0.0266244	0.000310579	4.3477	up	1154.04	1194.01	178.609	348.228	1528.65	629.342	107.362	127.092	418.054	51.5858	524.456	84.705	9.84656	10.0369	8.95971	9.64282	9.55309	9.08037	7.78994	7.84017	8.45982	6.09996	8.44783	5.76022	Detected	Detected	Detected	Detected	Detected	Detected	Detected	Detected	Detected	Detected	Detected	Detected	0	A_23_P67913	A_23_P67913	NM_013335	NM_013335	NM_013335	Hs.27059	29926	GMPPA
A_33_P3215282	0.0215502	2.7e-05	4.3396	up	59.2269	50.3687	11.3775	20.9459	44.3085	27.362	10.4552	7.61402	19.1023	8.64255	31.8512	22.7651	6.22703	6.28096	5.04167	5.76665	4.69952	5.04255	4.10341	3.31314	3.82075	3.11882	3.12497	2.87191	Detected	Detected	Not Detected	Detected	Detected	Detected	Not Detected	Not Detected	Detected	Not Detected	Detected	Detected	0	A_33_P3215282	A_33_P3215282	NM_032538	NM_032538	NM_032538	Hs.485436	84630	TTBK1
A_24_P396753	0.0280318	0.000381136	4.33909	up	40.6416	34.3761	16.6971	15.7693	123.069	42.9191	3.46416	16.9255	51.1814	12.3533	39.4362	11.999	5.78706	5.88611	5.57322	5.32672	6.08542	5.66946	2.68369	4.47374	5.34608	3.57105	3.52433	2.02474	Detected	Detected	Detected	Detected	Detected	Detected	Not Detected	Detected	Detected	Not Detected	Detected	Not Detected	0	A_24_P396753	A_24_P396753	NM_021643	NM_021643	NM_021643	Hs.467751	28951	TRIB2
A_23_P153583	0.0361037	0.00168608	4.32488	up	512.021	261.855	49.7968	43.6535	584.109	158.365	31.6395	69.2914	142.694	18.9604	261.643	18.6331	8.77911	8.118	7.15059	6.86098	8.18698	7.29492	5.86786	6.84642	6.87061	4.23059	7.3493	2.54985	Detected	Detected	Detected	Detected	Detected	Detected	Detected	Detected	Detected	Detected	Detected	Not Detected	0	A_23_P153583	A_23_P153583	NM_006247	NM_006247	NM_006247	Hs.654604	5536	PPP5C
A_33_P3304824	0.0236517	8.08e-05	4.32424	up	104.633	40.3815	11.4443	18.5176	86.9382	90.2105	8.31439	16.4905	25.9663	10.8437	41.3107	33.135	6.88149	6.05349	5.0506	5.57894	5.63968	6.59458	3.78441	4.43121	4.30351	3.39317	3.62465	3.58716	Detected	Detected	Not Detected	Detected	Detected	Detected	Not Detected	Detected	Detected	Not Detected	Detected	Detected	0	A_33_P3304824	A_33_P3304824	NR_104113	NR_104113	NR_104113		145249	LINC00618
A_33_P3376350	0.029409	0.0005772	4.32081	up	163.454	103.251	39.6559	144.279	142.66	66.5253	31.8311	12.2843	87.5631	26.4332	103.757	26.6176	7.4005	7.05967	6.81988	8.4913	6.27327	6.22546	5.87755	3.96283	6.1497	4.81149	5.64666	3.15403	Detected	Detected	Detected	Detected	Detected	Detected	Detected	Detected	Detected	Detected	Detected	Detected	0	A_33_P3376350	A_33_P3376350	AK128263		AK128263		124565	SLC38A10
A_32_P157927	0.04328	0.00290574	4.31771	up	2666.58	1134.62	1048.19	420.056	40306.5	2403.08	418.72	243.994	714.832	292.918	727.622	531.885	11.0353	9.96762	11.2499	9.88422	14.6681	10.9744	9.73777	8.84389	9.24911	9.17987	8.96811	9.13911	Detected	Detected	Detected	Detected	Detected	Detected	Detected	Detected	Detected	Detected	Detected	Detected	0	A_32_P157927	A_32_P157927	ENST00000390243		S62210	Hs.592929
A_33_P3246193	0.0280318	0.000381586	4.31272	up	69.7866	40.1895	2.91922	7.01987	25.6444	35.1718	7.56712	4.02855	11.0051	2.85161	21.32	19.5293	6.42117	6.04716	3.06305	4.16769	3.88195	5.39191	3.65912	2.62724	3.06424	1.85938	2.49559	2.61578	Detected	Detected	Not Detected	Not Detected	Detected	Detected	Not Detected	Not Detected	Not Detected	Not Detected	Detected	Detected	0	A_33_P3246193	A_33_P3246193	NM_001200049	NM_001200049	NM_001200049	Hs.298038	54777	CFAP46
A_33_P3245631	0.0314951	0.000869035	4.30638	up	375.723	188.079	32.09	69.2271	139.483	184.457	28.3904	29.6341	87.3923	9.82635	105.244	62.2653	8.39596	7.73141	6.51794	7.50209	6.24013	7.48718	5.69385	5.40938	6.14728	3.26969	5.67842	5.03724	Detected	Detected	Detected	Detected	Detected	Detected	Detected	Detected	Detected	Not Detected	Detected	Detected	0	A_33_P3245631	A_33_P3245631	NM_001297662	NM_001297662	NM_001297662	Hs.112949	22996	TTC39A
A_32_P353798	0.0424606	0.00274054	4.30594	up	143.404	175.927	10.0374	17.2295	192.907	226.994	15.9431	30.7135	63.1777	11.1153	71.1556	23.2062	7.25086	7.65713	4.87077	5.4688	6.68437	7.75091	4.74823	5.47095	5.66314	3.4257	4.83188	2.90498	Detected	Detected	Not Detected	Detected	Detected	Detected	Detected	Detected	Detected	Not Detected	Detected	Detected	0	A_32_P353798	A_32_P353798	NM_030783	NM_030783	NM_030783	Hs.731700	81490	PTDSS2
A_23_P330461	0.0258353	0.000236256	4.29949	up	1987.21	822.373	100.395	235.919	851.1	586.199	66.0892	90.9105	222.578	67.6974	331.961	105.246	10.6155	9.54005	8.14296	9.12931	8.70535	8.97744	7.03996	7.29348	7.53181	6.64208	7.7261	6.25223	Detected	Detected	Detected	Detected	Detected	Detected	Detected	Detected	Detected	Detected	Detected	Detected	0	A_23_P330461	A_23_P330461	NM_144686	NM_144686	NM_144686	Hs.355126	147798	TMC4
A_33_P3240333	0.0254975	0.000194373	4.29298	up	103.935	98.2702	125.763	61.1854	111.606	1008.55	28.4083	26.0686	87.7978	30.181	74.2686	84.0389	6.87486	7.00476	8.47118	7.33277	5.96487	9.73075	5.69441	5.1991	6.15388	5.0556	4.9228	5.74153	Detected	Detected	Detected	Detected	Detected	Detected	Detected	Detected	Detected	Detected	Detected	Detected	0	A_33_P3240333	A_33_P3240333	NM_002653	NM_002653	NM_002653	Hs.84136	5307	PITX1
A_23_P316850	0.0285992	0.000466668	4.2917	up	10345.5	5381.03	5810.74	8781.38	3401.01	691.017	338.899	391.193	2377.09	1381.07	539.22	694.021	12.9335	12.0842	13.3444	13.6796	10.7577	9.20831	9.45521	9.56772	10.9867	11.354	8.49109	9.5437	Detected	Detected	Detected	Detected	Detected	Detected	Detected	Detected	Detected	Detected	Detected	Detected	0	A_23_P316850	A_23_P316850	NM_182577	NM_182577	NM_182577	Hs.104777	284451	ODF3L2
A_33_P3404843	0.0380753	0.00200783	4.28792	up	1102.24	415.185	42.0455	93.8637	393.045	629.946	32.7628	65.3409	176.878	36.3855	204.897	66.2418	9.78237	8.67789	6.90554	7.92129	7.62771	9.08145	5.92041	6.74488	7.18905	5.40996	6.94677	5.18352	Detected	Detected	Detected	Detected	Detected	Detected	Detected	Detected	Detected	Detected	Detected	Detected	0	A_33_P3404843	A_33_P3404843	NM_172231	NM_172231	NM_172231	Hs.515274	57794	SUGP1
A_33_P3366161	0.0223734	5.74e-05	4.28383	up	123.272	159.161	58.5385	56.2667	78.7204	140.804	25.2338	37.6045	47.2336	21.9903	58.2896	37.756	7.06855	7.54504	7.38475	7.22097	5.50997	7.15178	5.50183	5.81308	5.22535	4.48116	4.38806	3.87818	Detected	Detected	Detected	Detected	Detected	Detected	Detected	Detected	Detected	Detected	Detected	Detected	0	A_33_P3366161	A_33_P3366161	NM_000663	NM_000663	NM_000663	Hs.336768	18	ABAT
A_24_P216421	0.0440647	0.00308991	4.27895	up	753.359	302.498	20.9858	43.5635	309.973	471.51	28.5815	39.0426	114.339	42.1447	108.631	43.1916	9.27494	8.28729	5.90011	6.85849	7.31456	8.68851	5.70501	5.87409	6.53981	5.69579	5.74368	4.18197	Detected	Detected	Detected	Detected	Detected	Detected	Detected	Detected	Detected	Detected	Detected	Detected	0	A_24_P216421	A_24_P216421	NM_033148	NM_033148	NM_033148	Hs.307720	1838	DTNB
A_33_P3814473	0.0250229	0.000174859	4.26955	up	271.713	199.828	34.7585	81.0694	91.7421	86.6393	20.4608	25.7568	62.5132	20.909	74.5301	50.7948	8.00394	7.80914	6.63364	7.7272	5.7126	6.54608	5.15164	5.17773	5.64782	4.39199	4.93172	4.5672	Detected	Detected	Detected	Detected	Detected	Detected	Detected	Detected	Detected	Detected	Detected	Detected	0	A_33_P3814473	A_33_P3814473	BF248073		BF248073	Hs.655548	7115	TMSB4XP1
A_23_P336015	0.0298413	0.000630262	4.26238	up	203.333	297.869	50.6048	151.75	235.65	278.993	34.8769	40.982	108.33	23.12	142.004	55.7023	7.66717	8.26802	7.17426	8.56069	6.94886	8.00017	6.02356	5.95591	6.45526	4.56939	6.28124	4.78387	Detected	Detected	Detected	Detected	Detected	Detected	Detected	Detected	Detected	Detected	Detected	Detected	0	A_23_P336015	A_23_P336015	NM_015658	NM_015658	NM_015658	Hs.405987	26155	NOC2L
A_32_P151782	0.0236517	7.74e-05	4.2612	up	41.3921	66.1229	13.0853	18.8758	32.2352	78.7949	5.99225	6.74575	20.8652	17.3288	27.9959	37.2848	5.80989	6.57169	5.23361	5.60635	4.22257	6.43608	3.37579	3.17185	3.95761	4.08244	2.89417	3.85077	Detected	Detected	Not Detected	Detected	Detected	Detected	Not Detected	Not Detected	Detected	Not Detected	Detected	Detected	0	A_32_P151782	A_32_P151782	ENST00000612598			Hs.738523
A_21_P0000011	0.0284338	0.000411044	4.25961	up	55.468	25.7833	3.79446	12.363	21.6278	23.2329	3.54005	4.47139	14.125	6.30346	21.4276	11.954	6.14883	5.59726	3.52485	4.96433	3.63333	4.81142	2.70941	2.7399	3.38286	2.77892	2.50292	2.02169	Detected	Detected	Not Detected	Detected	Detected	Detected	Not Detected	Not Detected	Not Detected	Not Detected	Detected	Not Detected	0	A_21_P0000011	A_21_P0000011	NM_001145815	NM_001145815	NM_001145815	Hs.740430	51005	AMDHD2
A_33_P3322307	0.0254975	0.000206166	4.2414	up	325.854	199.256	41.8808	75.8466	415.028	876.123	44.0429	32.5701	94.3477	23.0461	153.256	97.093	8.21757	7.80524	6.9	7.63151	7.70388	9.53263	6.40313	5.5663	6.25382	4.56404	6.42418	6.07213	Detected	Detected	Detected	Detected	Detected	Detected	Detected	Detected	Detected	Detected	Detected	Detected	0	A_33_P3322307	A_33_P3322307	NM_001257145	NM_001257145	NM_001257145	Hs.443960	1663	DDX11
A_33_P3299319	0.033506	0.00117654	4.24005	up	121.843	23.9343	3.50371	5.84949	118.86	37.4342	6.36194	8.52262	18.786	6.47278	26.617	19.3615	7.05488	5.52439	3.38634	3.94259	6.04056	5.47812	3.44756	3.45767	3.79577	2.80512	2.81097	2.60531	Detected	Detected	Not Detected	Not Detected	Detected	Detected	Not Detected	Not Detected	Detected	Not Detected	Detected	Detected	0	A_33_P3299319	A_33_P3299319	NM_001136137	NM_001136137	NM_001136137	Hs.652114	6158	RPL28
A_23_P409623	0.0338799	0.00124871	4.2397	up	151.062	144.69	15.8296	16.2213	205.802	148.093	8.06602	39.1939	78.0504	12.3578	56.794	33.2437	7.31353	7.43864	5.4976	5.37276	6.76924	7.21274	3.74314	5.88167	5.97892	3.57187	4.33084	3.59432	Detected	Detected	Detected	Detected	Detected	Detected	Not Detected	Detected	Detected	Not Detected	Detected	Detected	0	A_23_P409623	A_23_P409623	NM_003621	NM_003621	NM_003621	Hs.655714	8495	PPFIBP2
A_33_P3287472	0.0250229	0.000148061	4.23786	up	63.0771	56.6713	12.9989	22.4004	73.1603	89.7337	14.6373	6.86731	28.2979	8.81869	53.4089	35.1646	6.30276	6.40579	5.22297	5.86807	5.40863	6.58792	4.60964	3.19347	4.43698	3.14221	4.19337	3.72045	Detected	Detected	Not Detected	Detected	Detected	Detected	Not Detected	Not Detected	Detected	Not Detected	Detected	Detected	0	A_33_P3287472	A_33_P3287472	NM_001007533	NM_001007533	NM_001007533	Hs.454720	116729	PPP1R27
A_33_P3237744	0.0485279	0.00403748	4.23313	up	1202.94	1434.9	84.3869	620.066	584.43	834.43	74.3185	103.018	305.744	58.721	601.661	88.0337	9.90037	10.278	7.89504	10.3614	8.18825	9.4666	7.22516	7.50426	7.99902	6.3593	8.66361	5.84794	Detected	Detected	Detected	Detected	Detected	Detected	Detected	Detected	Detected	Detected	Detected	Detected	0	A_33_P3237744	A_33_P3237744	NM_001199824	NM_001199824		Hs.712129	100130827	SBK3
A_33_P3389689	0.0250229	0.000164497	4.2295	up	152.261	129.043	12.2595	24.1451	180.827	75.8672	12.8569	15.1721	35.3877	10.0803	72.6409	51.3461	7.3218	7.31202	5.13985	5.97841	6.59661	6.3895	4.41153	4.29514	4.78261	3.29953	4.87455	4.5919	Detected	Detected	Not Detected	Detected	Detected	Detected	Not Detected	Detected	Detected	Not Detected	Detected	Detected	0	A_33_P3389689	A_33_P3389689	NM_022356	NM_022356	NM_022356	Hs.720014	64175	P3H1
A_32_P170925	0.0267944	0.000317107	4.22886	up	54.073	85.0209	12.5062	12.1379	58.1285	65.8651	2.94789	15.0943	29.6488	7.54903	54.1465	30.917	6.11821	6.84429	5.16705	4.93612	5.0901	6.21417	2.44806	4.2882	4.51079	2.97117	4.22631	3.4438	Detected	Detected	Not Detected	Not Detected	Detected	Detected	Not Detected	Detected	Detected	Not Detected	Detected	Detected	0	A_32_P170925	A_32_P170925	NM_052883	NM_052883	NM_052883	Hs.477475	114112	TXNRD3
A_33_P3284247	0.02321	6.87e-05	4.22467	up	30.4682	63.0931	20.1926	21.2806	74.1025	20.9	7.32069	5.3838	34.1563	14.2235	35.8316	22.0745	5.45001	6.52163	5.84458	5.79003	5.42507	4.65909	3.62128	2.93291	4.72815	3.77232	3.34256	2.82016	Detected	Detected	Detected	Detected	Detected	Detected	Not Detected	Not Detected	Detected	Detected	Detected	Detected	0	A_33_P3284247	A_33_P3284247	ENST00000382966				352887	GYG2P1
A_33_P3241696	0.0468098	0.00363854	4.21593	up	146.168	54.0711	576.985	68.0196	104.174	127.402	17.4311	66.0041	76.0692	84.5131	46.4932	31.4801	7.27382	6.35447	10.4865	7.47582	5.8744	7.02773	4.89878	6.76039	5.93804	7.07978	3.87818	3.48247	Detected	Detected	Detected	Detected	Detected	Detected	Detected	Detected	Detected	Detected	Detected	Detected	0	A_33_P3241696	A_33_P3241696	NM_001297417	NM_001297417	NM_001297417	Hs.278962	51151	SLC45A2
A_33_P3241756	0.0494794	0.00423823	4.21272	up	280.042	574.465	19.9537	48.2785	419.999	420.733	20.5298	37.7845	129.661	18.4511	268.615	49.1798	8.04157	9.08037	5.82955	7.00634	7.72289	8.53606	5.15711	5.82048	6.72583	4.18479	7.39364	4.48644	Detected	Detected	Detected	Detected	Detected	Detected	Detected	Detected	Detected	Detected	Detected	Detected	0	A_33_P3241756	A_33_P3241756	ENST00000517917		AK309052		3551	IKBKB
A_23_P55251	0.035158	0.0014938	4.21089	up	1816.93	1562.5	212.51	119.922	1159.88	1193.1	63.4839	153.484	498.249	73.8759	602.678	82.2232	10.4753	10.4013	9.20895	8.243	9.15396	9.95982	6.98026	8.13176	8.70734	6.81988	8.66742	5.69089	Detected	Detected	Detected	Detected	Detected	Detected	Detected	Detected	Detected	Detected	Detected	Detected	0	A_23_P55251	A_23_P55251	NM_002204	NM_002204	NM_002204	Hs.265829	3675	ITGA3
A_33_P3262470	0.0215502	2.49e-05	4.20529	up	24.4882	23.8291	41.0715	15.2388	50.1082	47.3229	8.9123	8.18995	31.2622	7.4095	36.5706	23.0279	5.19364	5.51939	6.87242	5.27282	4.87408	5.79723	3.8801	3.40155	4.59184	2.95021	3.38086	2.89179	Detected	Detected	Detected	Detected	Detected	Detected	Not Detected	Not Detected	Detected	Not Detected	Detected	Detected	0	A_33_P3262470	A_33_P3262470	ENST00000493476		AB464252		387923	SERP2
A_33_P3368159	0.0318151	0.000914666	4.20353	up	569.537	376.536	39.6423	147.308	500.114	155.889	30.2191	40.9096	125.133	22.5783	200.862	85.0639	8.91918	8.55881	6.81895	8.52057	7.96503	7.27437	5.79355	5.95304	6.67226	4.5284	6.91003	5.77002	Detected	Detected	Detected	Detected	Detected	Detected	Detected	Detected	Detected	Detected	Detected	Detected	0	A_33_P3368159	A_33_P3368159	NM_032214	NM_032214	NM_032214	Hs.713578	84174	SLA2
A_33_P3236272	0.0225501	6.28e-05	4.19966	up	655.172	977.881	134.3	218.103	926.434	759.981	40.4647	72.5546	256.586	83.0027	246.958	146.86	9.10074	9.7611	8.56228	9.03429	8.82109	9.33933	6.26866	6.91716	7.74322	7.04991	7.26177	6.95647	Detected	Detected	Detected	Detected	Detected	Detected	Detected	Detected	Detected	Detected	Detected	Detected	0	A_33_P3236272	A_33_P3236272	NM_001173539	NM_001173539	NM_001173539	Hs.461705	54971	BANP
A_23_P22499	0.0357836	0.00164017	4.19845	up	459.626	495.596	38.8783	45.6038	529.954	694.732	36.1336	56.5891	142.21	30.463	211.757	50.8939	8.64983	8.8991	6.79249	6.92268	8.04289	9.21477	6.08371	6.50556	6.86424	5.074	7.0032	4.5719	Detected	Detected	Detected	Detected	Detected	Detected	Detected	Detected	Detected	Detected	Detected	Detected	0	A_23_P22499	A_23_P22499	NM_019067	NM_019067	NM_019067	Hs.654677	54552	GNL3L
A_33_P3367939	0.0217756	3.62e-05	4.19767	up	27.1004	32.0135	18.3092	10.7992	18.3199	18.1927	10.1721	5.27494	12.2233	6.61364	14.0551	11.6806	5.31035	5.81573	5.7075	4.76569	3.40082	4.45034	4.06509	2.91172	3.19428	2.82781	2.03267	2.00134	Detected	Detected	Detected	Not Detected	Detected	Detected	Not Detected	Not Detected	Not Detected	Not Detected	Not Detected	Not Detected	0	A_33_P3367939	A_33_P3367939	NM_182973	NM_182973	NM_182973	Hs.465560	360200	TMPRSS9
A_32_P215318	0.0457813	0.00342833	4.19681	up	161.165	46.3158	3.54645	11.9895	112.091	218.041	5.72303	16.6949	25.3676	9.34205	54.7116	34.0721	7.38259	6.19376	3.40603	4.91707	5.97022	7.69654	3.32418	4.44986	4.26781	3.20909	4.24995	3.64959	Detected	Detected	Not Detected	Detected	Detected	Detected	Not Detected	Detected	Detected	Not Detected	Detected	Detected	0	A_32_P215318	A_32_P215318	NM_198839	NM_198839	NM_198839	Hs.160556	31	ACACA
A_23_P87279	0.0254975	0.000216331	4.19433	up	82.7697	128.432	23.2944	26.8867	54.3178	57.9209	13.7504	13.5407	48.3829	7.98844	52.4624	34.5453	6.61943	7.30762	6.04708	6.14826	4.99003	6.05769	4.51799	4.10893	5.26362	3.03592	4.15336	3.67967	Detected	Detected	Detected	Detected	Detected	Detected	Not Detected	Detected	Detected	Not Detected	Detected	Detected	0	A_23_P87279	A_23_P87279	NM_014555	NM_014555	NM_014555	Hs.272287	29850	TRPM5
A_33_P3424267	0.042458	0.00273185	4.19358	up	715.563	397	34.8683	149.254	439.946	419.056	25.5503	74.7361	175.101	37.2269	219.206	54.748	9.21186	8.62644	6.63764	8.53921	7.78292	8.52979	5.52217	6.96148	7.17448	5.45222	7.06297	4.74544	Detected	Detected	Detected	Detected	Detected	Detected	Detected	Detected	Detected	Detected	Detected	Detected	0	A_33_P3424267	A_33_P3424267	NM_001083601	NM_001083601	NM_001083601	Hs.513296	79903	NAA60
A_23_P70991	0.0299743	0.000650702	4.19116	up	84.7666	69.8893	10.0733	21.6782	77.237	108.13	10.1096	23.5788	38.3837	12.8573	38.3899	21.4923	6.64699	6.62876	4.87617	5.81774	5.48179	6.82098	4.05681	5.03052	4.90795	3.62599	3.47157	2.77549	Detected	Detected	Not Detected	Detected	Detected	Detected	Not Detected	Detected	Detected	Not Detected	Detected	Detected	0	A_23_P70991	A_23_P70991	NM_006303	NM_006303	NM_006303	Hs.301613	7965	AIMP2
A_23_P94857	0.0326744	0.00105956	4.18615	up	216.528	198.127	28.6888	58.8232	463.44	216.125	22.3851	45.1644	97.3959	15.6272	199.896	36.0885	7.74176	7.79537	6.35132	7.27985	7.85908	7.6846	5.30209	6.11829	6.30122	3.91314	6.90169	3.78178	Detected	Detected	Detected	Detected	Detected	Detected	Detected	Detected	Detected	Not Detected	Detected	Detected	0	A_23_P94857	A_23_P94857	NM_016219	NM_016219	NM_016219	Hs.279881	11253	MAN1B1
A_23_P165952	0.032572	0.00105279	4.17533	up	147.309	113.615	13.4233	20.77	189.64	54.8199	5.80445	19.9742	54.5676	21.6703	74.4367	22.2283	7.28244	7.16957	5.26718	5.75446	6.66184	5.98638	3.33985	4.74765	5.44514	4.45662	4.92895	2.83231	Detected	Detected	Not Detected	Detected	Detected	Detected	Not Detected	Detected	Detected	Detected	Detected	Detected	0	A_23_P165952	A_23_P165952	NM_024855	NM_024855	NM_024855	Hs.371585	79913	ACTR5
A_32_P202859	0.0304218	0.000703369	4.17413	up	1705.95	815.741	755.838	992.912	433.902	114.384	79.5046	88.1173	285.843	133.379	149.099	169.822	10.3783	9.53146	10.8461	10.9652	7.76478	6.8894	7.32843	7.24027	7.90139	7.9261	6.37049	7.23978	Detected	Detected	Detected	Detected	Detected	Detected	Detected	Detected	Detected	Detected	Detected	Detected	0	A_32_P202859	A_32_P202859	NM_181788	NM_181788	NM_181788	Hs.155833	341567	H1FNT
A_24_P44931	0.0285545	0.000451086	4.16588	up	126.781	99.8335	23.9339	29.2614	137.295	103.746	14.2873	17.9585	90.8254	20.2005	55.3129	26.6729	7.10063	7.02433	6.08819	6.27268	6.2187	6.76879	4.57472	4.57332	6.20355	4.33661	4.27434	3.15906	Detected	Detected	Detected	Detected	Detected	Detected	Detected	Detected	Detected	Detected	Detected	Detected	0	A_24_P44931	A_24_P44931	NM_032868	NM_032868	NM_032868	Hs.321689	84954	MPND
A_33_P3233081	0.0442926	0.00313033	4.16197	up	1063.32	308.788	14.1363	50.2923	729.338	537.806	43.8511	38.8414	115.959	18.8321	230.729	68.7039	9.72824	8.30861	5.33943	7.06694	8.49579	8.86329	6.39713	5.86616	6.55976	4.21967	7.14491	5.27109	Detected	Detected	Detected	Detected	Detected	Detected	Detected	Detected	Detected	Detected	Detected	Detected	0	A_33_P3233081	A_33_P3233081	NM_002441	NM_002441	NM_002441	Hs.647011	4439	MSH5
A_33_P3228322	0.043336	0.00291543	4.16029	up	1237.2	1248.58	108.208	191.498	1881.77	2062.77	54.9951	162.561	529.266	51.3042	827.875	113.127	9.94099	10.1007	8.25134	8.86855	9.86607	10.7422	6.76061	8.2235	8.79597	6.08695	9.14933	6.41337	Detected	Detected	Detected	Detected	Detected	Detected	Detected	Detected	Detected	Detected	Detected	Detected	0	A_33_P3228322	A_33_P3228322	NM_173042	NM_173042	NM_173042	Hs.591967	10068	IL18BP
A_33_P3390246	0.0215502	1.39e-05	4.1577	up	82.9978	53.9806	51.1252	35.8127	72.7488	56.1981	13.8274	18.7997	53.0195	25.4747	35.6491	26.7222	6.62341	6.35339	7.18805	6.57035	5.4017	6.01914	4.5264	4.65074	5.40055	4.74502	3.33463	3.16399	Detected	Detected	Detected	Detected	Detected	Detected	Not Detected	Detected	Detected	Detected	Detected	Detected	0	A_33_P3390246	A_33_P3390246	AK123701		AK123701
A_23_P165783	0.0492042	0.00418865	4.15714	up	3738.45	2558.72	84.8263	107.114	1083.57	176.542	77.0344	131.226	495.006	75.3606	406.709	39.5066	11.5106	11.0947	7.90224	8.09593	9.06321	7.43088	7.28059	7.89141	8.69884	6.8605	8.05173	3.98096	Detected	Detected	Detected	Detected	Detected	Detected	Detected	Detected	Detected	Detected	Detected	Detected	0	A_23_P165783	A_23_P165783	NM_024101	NM_024101	NM_024101	Hs.102406	79083	MLPH
A_23_P23646	0.0332573	0.00111923	4.15559	up	1063	540.708	57.536	81.979	1101.68	437.122	52.5785	82.2192	250.069	32.3103	335.988	54.3831	9.72765	9.00875	7.36003	7.74426	9.08543	8.58222	6.69393	7.12331	7.6997	5.18449	7.74675	4.72983	Detected	Detected	Detected	Detected	Detected	Detected	Detected	Detected	Detected	Detected	Detected	Detected	0	A_23_P23646	A_23_P23646	NM_007122	NM_007122	NM_007122	Hs.414880	7391	USF1
A_33_P3422747	0.0290608	0.000495574	4.15443	up	95.8324	109.056	40.2337	21.8571	138.278	116.002	17.0281	17.2789	66.5061	8.97186	121.802	26.5013	6.78532	7.1215	6.84082	5.83108	6.22839	6.90984	4.86027	4.5085	5.73855	3.16143	5.97412	3.14617	Detected	Detected	Detected	Detected	Detected	Detected	Detected	Detected	Detected	Not Detected	Detected	Detected	0	A_33_P3422747	A_33_P3422747	NM_152383	NM_152383	NM_152383	Hs.732236	129563	DIS3L2
A_33_P3336437	0.0475009	0.00377925	4.15029	up	931.853	532.379	25.4921	43.1055	582.866	511.035	27.1075	36.4692	155.013	30.8083	280.648	69.1348	9.54741	8.98781	6.17629	6.84128	8.18508	8.79669	5.62014	5.75872	6.99303	5.09493	7.46385	5.28461	Detected	Detected	Detected	Detected	Detected	Detected	Detected	Detected	Detected	Detected	Detected	Detected	0	A_33_P3336437	A_33_P3336437	NM_015072	NM_015072	NM_015072	Hs.709609	23093	TTLL5
A_32_P65706	0.0441992	0.00311428	4.14647	up	242.402	141.923	16.3453	33.866	80.3085	249.375	11.0722	19.7937	55.9758	11.1841	122.873	51.3786	7.87584	7.41725	5.54267	6.49555	5.53669	7.86375	4.18376	4.73299	5.48199	3.43436	5.99389	4.59346	Detected	Detected	Detected	Detected	Detected	Detected	Not Detected	Detected	Detected	Not Detected	Detected	Detected	0	A_32_P65706	A_32_P65706	NM_001271829	NM_001271829	NM_001271829	Hs.586441	100129385	C9orf92
A_24_P376047	0.0250229	0.000129194	4.13887	up	40.1917	28.0851	10.073	11.5635	16.7931	27.0935	4.72219	4.59986	20.1729	7.44465	18.9097	13.3718	5.7728	5.68328	4.87603	4.86184	3.28215	5.02846	3.09795	2.76736	3.90712	2.95567	2.35042	2.13062	Detected	Detected	Not Detected	Detected	Not Detected	Detected	Not Detected	Not Detected	Detected	Not Detected	Detected	Not Detected	0	A_24_P376047	A_24_P376047	NM_004917	NM_004917	NM_004917	Hs.218366	9622	KLK4
A_23_P66664	0.0313381	0.000814154	4.13856	up	179.401	158.285	19.9715	25.0509	146.989	384.583	13.9561	29.0757	66.1221	16.3511	87.3505	48.3375	7.51749	7.53832	5.83091	6.0353	6.31254	8.4186	4.54048	5.37602	5.72976	3.98766	5.27723	4.44725	Detected	Detected	Detected	Detected	Detected	Detected	Detected	Detected	Detected	Detected	Detected	Detected	0	A_23_P66664	A_23_P66664	NM_133439	NM_133439	NM_133439	Hs.500066	6871	TADA2A
A_33_P3280471	0.0380384	0.00200286	4.13283	up	365.569	181.754	14.3833	34.9636	303.731	146.033	17.949	31.5183	107.427	13.8459	91.3146	42.4683	8.36387	7.69418	5.3616	6.5359	7.28634	7.19671	4.9453	5.51179	6.443	3.73362	5.37431	4.14782	Detected	Detected	Not Detected	Detected	Detected	Detected	Detected	Detected	Detected	Not Detected	Detected	Detected	0	A_33_P3280471	A_33_P3280471	NM_001982	NM_001982	NM_001982	Hs.118681	2065	ERBB3
A_24_P71244	0.0225501	6.46e-05	4.13016	up	18.9212	16.1573	27.6185	10.3016	74.4068	12.0695	4.25251	13.7053	23.1398	2.70868	25.5463	17.7734	4.88497	5.15805	6.2954	4.6939	5.42987	3.87304	2.96843	4.12977	4.12791	1.60565	2.74806	2.47821	Detected	Detected	Detected	Not Detected	Detected	Not Detected	Not Detected	Detected	Detected	Not Detected	Detected	Detected	0	A_24_P71244	A_24_P71244	NM_005026	NM_005026	NM_005026	Hs.518451	5293	PIK3CD
A_33_P3369550	0.0391063	0.00214581	4.12923	up	8035.68	8414.49	583.363	4238.01	12310.9	6020.05	373.796	862.899	2921.26	389.182	3797.13	398.07	12.5558	12.7122	10.4989	12.8544	12.7259	12.3269	9.59057	10.6789	11.2824	9.59315	11.5588	8.69512	Detected	Detected	Detected	Detected	Detected	Detected	Detected	Detected	Detected	Detected	Detected	Detected	0	A_33_P3369550	A_33_P3369550	NM_004768	NM_004768	NM_004768	Hs.479693	9295	SRSF11
A_23_P105144	0.0397138	0.00226802	4.12466	up	519.746	138.975	10.2948	14.8547	115.907	39.1489	10.4982	17.2172	42.6304	10.0426	49.3735	52.0833	8.80097	7.39503	4.90628	5.23209	6.01085	5.54096	4.10916	4.50312	5.06683	3.29575	4.01846	4.62721	Detected	Detected	Not Detected	Detected	Detected	Detected	Not Detected	Detected	Detected	Not Detected	Detected	Detected	0	A_23_P105144	A_23_P105144	NM_020974	NM_020974	NM_020974	Hs.523468	57758	SCUBE2
A_32_P214284	0.0250229	0.000136949	4.12142	up	145.186	80.8111	191.43	75.4028	65.0413	42.9763	22.5271	35.9304	50.5583	49.2852	27.8611	42.0625	7.26496	6.78785	9.0593	7.62162	5.2474	5.67113	5.31284	5.73304	5.32837	6.00655	2.88597	4.12664	Detected	Detected	Detected	Detected	Detected	Detected	Detected	Detected	Detected	Detected	Detected	Detected	0	A_32_P214284	A_32_P214284	ENST00000608206	XR_159429	XR_159429	Hs.635286	100129516	LOC100129516
A_23_P137361	0.0234653	7.56e-05	4.11745	up	115.329	99.1785	16.9223	32.232	178.89	97.7674	17.0377	21.0651	42.5078	18.8832	56.2544	35.5608	6.99067	7.01546	5.5906	6.422	6.58092	6.69584	4.8615	4.84106	5.06235	4.22368	4.31067	3.74572	Detected	Detected	Detected	Detected	Detected	Detected	Detected	Detected	Detected	Detected	Detected	Detected	0	A_23_P137361	A_23_P137361	NM_017818	NM_017818	NM_017818	Hs.31714	49856	WRAP73
A_23_P410700	0.0254975	0.000213969	4.1157	up	20.7875	26.0653	2.80544	8.42315	27.9037	13.7021	2.26211	5.49534	5.05844	3.21317	29.3549	11.683	4.99618	5.61066	2.98558	4.41406	4.00417	4.04446	1.53851	2.95378	2.29337	2.04456	2.97634	2.00174	Detected	Detected	Not Detected	Not Detected	Detected	Detected	Not Detected	Not Detected	Not Detected	Not Detected	Detected	Not Detected	0	A_23_P410700	A_23_P410700	NM_152337	NM_152337	NM_152337	Hs.658684	123775	C16orf46
A_23_P331895	0.0272322	0.000349946	4.11125	up	485.981	204.68	48.3594	207.901	1280.29	667.305	37.7068	66.627	136.831	45.916	239.62	95.4939	8.71746	7.83268	7.10936	8.97444	9.29246	9.15666	6.15554	6.77682	6.80588	5.86376	7.21191	6.0317	Detected	Detected	Detected	Detected	Detected	Detected	Detected	Detected	Detected	Detected	Detected	Detected	0	A_23_P331895	A_23_P331895	NM_025250	NM_025250	NM_025250	Hs.440899	80727	TTYH3
A_23_P300076	0.0254975	0.000198996	4.1107	up	369.038	206.986	18.0722	49.4916	216.035	100.07	39.1549	18.1456	48.6073	18.4928	92.5393	51.626	8.37678	7.84445	5.68906	7.04381	6.83476	6.72378	6.21526	4.59259	5.27077	4.18921	5.40316	4.60535	Detected	Detected	Detected	Detected	Detected	Detected	Detected	Detected	Detected	Detected	Detected	Detected	0	A_23_P300076	A_23_P300076	NM_032263	NM_032263	NM_032263	Hs.591675	84223	IQCG
A_33_P3405848	0.0250229	9.96e-05	4.11026	up	68.6203	52.2472	41.685	25.3395	65.6737	63.6862	25.3086	10.8207	33.0187	6.25167	48.3951	42.8944	6.40264	6.31728	6.89355	6.05425	5.26152	6.17312	5.50766	3.77366	4.67916	2.77011	3.9687	4.16769	Detected	Detected	Detected	Detected	Detected	Detected	Detected	Not Detected	Detected	Not Detected	Detected	Detected	0	A_33_P3405848	A_33_P3405848	NM_175719	NM_175719	NM_175719	Hs.467554	7173	TPO
A_33_P3299285	0.0356126	0.00158486	4.11022	up	82.3448	87.9545	10.3616	32.4394	40.921	168.398	21.4052	9.07065	40.1764	7.2054	45.5272	40.9523	6.61267	6.88243	4.91512	6.43126	4.58157	7.37131	5.22856	3.53527	4.97937	2.91961	3.83178	4.06447	Detected	Detected	Not Detected	Detected	Detected	Detected	Detected	Not Detected	Detected	Not Detected	Detected	Detected	0	A_33_P3299285	A_33_P3299285	NM_001002901	NM_001002901	NM_001002901	Hs.517422	127943	FCRLB
A_24_P22488	0.0283053	0.000404346	4.10282	up	85.1537	63.776	16.328	44.101	95.6609	77.6548	6.97133	16.9791	41.5761	22.4738	75.7301	24.6533	6.65142	6.53386	5.54173	6.87458	5.76698	6.41741	3.55821	4.4794	5.03111	4.51992	4.96748	3.01016	Detected	Detected	Detected	Detected	Detected	Detected	Not Detected	Detected	Detected	Detected	Detected	Detected	0	A_24_P22488	A_24_P22488	NM_003502	NM_003502	NM_003502	Hs.592082	8312	AXIN1
A_21_P0000040	0.0284338	0.000437187	4.1015	up	64.9457	111.832	12.5177	24.3529	52.9055	24.9898	6.37193	6.60947	27.6009	20.546	44.5641	26.616	6.33608	7.15005	5.16847	5.99104	4.95442	4.91521	3.44934	3.1491	4.39737	4.36389	3.7847	3.15397	Detected	Detected	Not Detected	Detected	Detected	Detected	Not Detected	Not Detected	Detected	Detected	Detected	Detected	0	A_21_P0000040	A_21_P0000040	NM_001164313	NM_001164313	NM_001164313	Hs.409876	9841	ZBTB24
A_24_P294821	0.0250229	0.000142199	4.09607	up	20.7874	34.8892	6.29769	9.21727	86.8349	83.0635	6.95419	16.432	8.72027	3.44038	49.1128	20.7582	4.9961	5.90295	4.24742	4.5382	5.63764	6.49606	3.55485	4.42597	2.79736	2.11592	4.00427	2.71457	Detected	Detected	Not Detected	Not Detected	Detected	Detected	Not Detected	Detected	Not Detected	Not Detected	Detected	Detected	0	A_24_P294821	A_24_P294821	NM_003898	NM_003898	NM_003898	Hs.434494	8871	SYNJ2
A_23_P304279	0.0267948	0.000331511	4.0937	up	112.984	157.57	32.5546	55.8598	129.8	67.0179	29.6037	16.2385	63.3414	13.4437	77.622	38.0933	6.96659	7.53365	6.53769	7.21216	6.15211	6.2342	5.75933	4.40564	5.66614	3.68603	5.02213	3.89668	Detected	Detected	Detected	Detected	Detected	Detected	Detected	Detected	Detected	Not Detected	Detected	Detected	0	A_23_P304279	A_23_P304279	NM_000080	NM_000080	NM_000080	Hs.654535	1145	CHRNE
A_23_P133807	0.0250229	0.000136479	4.09121	up	386.197	395.517	134.46	174.674	279.641	233.625	43.4029	67.389	147.978	31.2951	147.392	77.7878	8.43068	8.62244	8.56337	8.75737	7.16946	7.7851	6.38028	6.79499	6.92645	5.12422	6.34898	5.55834	Detected	Detected	Detected	Detected	Detected	Detected	Detected	Detected	Detected	Detected	Detected	Detected	0	A_23_P133807	A_23_P133807	NM_138572	NM_138572	NM_138572	Hs.520122	129685	TAF8
A_24_P340696	0.0319328	0.000961142	4.09057	up	16.8851	22.0602	3.54785	2.7781	34.1143	63.6987	3.34171	4.12563	9.09291	4.18988	19.6558	10.7876	4.74378	5.44884	3.40682	2.89653	4.30552	6.17342	2.62869	2.65228	2.84194	2.33087	2.39365	1.93368	Detected	Detected	Not Detected	Not Detected	Detected	Detected	Not Detected	Not Detected	Not Detected	Not Detected	Not Detected	Not Detected	0	A_24_P340696	A_24_P340696	NM_014509	NM_014509	NM_014509	Hs.728878	253190	SERHL2
A_23_P50674	0.0217122	2.93e-05	4.08143	up	147.978	228.985	39.813	43.3243	135.342	68.2713	18.0394	28.0866	55.992	20.2866	72.9668	43.9598	7.2873	7.95885	6.8253	6.8499	6.20203	6.25613	4.95275	5.31906	5.4826	4.34446	4.88452	4.22169	Detected	Detected	Detected	Detected	Detected	Detected	Not Detected	Detected	Detected	Detected	Detected	Detected	0	A_23_P50674	A_23_P50674	NM_001031735	NM_001031735	NM_001031735	Hs.424049	113177	IZUMO4
A_23_P326893	0.0490353	0.00414148	4.08115	up	234.981	838.139	11.8567	23.766	216.883	40.8575	76.6295	15.5862	43.06	11.0267	59.0223	43.5542	7.84101	9.56534	5.09561	5.95538	6.84008	5.60276	7.27219	4.33882	5.08265	3.41399	4.41696	4.20172	Detected	Detected	Not Detected	Detected	Detected	Detected	Detected	Detected	Detected	Not Detected	Detected	Detected	0	A_23_P326893	A_23_P326893	NM_145045	NM_145045	NM_145045	Hs.124010	115948	CCDC151
A_33_P3370019	0.043455	0.00294624	4.07886	up	19.6012	19.8697	65.3803	12.8152	1088.52	55.6757	11.4189	11.7252	95.6591	9.14209	40.4856	51.1551	4.92733	5.35067	7.54228	5.01584	9.0702	6.00648	4.23079	3.89026	6.27515	3.18225	3.58153	4.58384	Detected	Detected	Detected	Detected	Detected	Detected	Not Detected	Not Detected	Detected	Not Detected	Detected	Detected	0	A_33_P3370019	A_33_P3370019	ENST00000390556		AK093943	Hs.510635
A_33_P3671506	0.0267948	0.000328692	4.07762	up	2782.99	3871.33	424.653	1363.88	2778.28	1076.55	144.462	276.806	1168.95	150.689	643.302	285.728	11.0923	11.6417	10.1093	11.3641	10.4552	9.8192	8.23219	9.03701	9.97196	8.14101	8.77469	8.15865	Detected	Detected	Detected	Detected	Detected	Detected	Detected	Detected	Detected	Detected	Detected	Detected	0	A_33_P3671506	A_33_P3671506	AK021734		AK021734	Hs.729004	153811	LOC153811
A_33_P3211174	0.0415423	0.00255012	4.07735	up	240.255	259.855	63.977	66.1965	246.445	278.392	39.3996	55.2881	110.611	18.7159	220.516	28.8165	7.86494	8.1112	7.51199	7.43923	7.0024	7.99784	6.22498	6.46139	6.48573	4.2093	7.07131	3.3091	Detected	Detected	Detected	Detected	Detected	Detected	Detected	Detected	Detected	Detected	Detected	Detected	0	A_33_P3211174	A_33_P3211174	ENST00000262971		AK315530	Hs.105779	51588	PIAS4
A_23_P212844	0.0250229	0.000159112	4.07721	up	158.682	64.7558	75.2768	64.4518	236.735	215.444	31.2974	26.8852	82.9419	17.974	109.413	48.6868	7.36423	6.54915	7.74308	7.4045	6.95314	7.6804	5.84956	5.24637	6.06911	4.14234	5.75836	4.46328	Detected	Detected	Detected	Detected	Detected	Detected	Detected	Detected	Detected	Detected	Detected	Detected	0	A_23_P212844	A_23_P212844	NM_006342	NM_006342	NM_006342	Hs.104019	10460	TACC3
A_24_P275828	0.0293226	0.000554606	4.07471	up	114.155	63.922	10.8893	19.9574	141.995	65.8366	16.7708	14.5107	45.5519	15.8429	43.5266	19.4989	6.97708	6.53689	4.98453	5.69441	6.2657	6.21359	4.83724	4.22262	5.17051	3.93421	3.73362	2.61382	Detected	Detected	Not Detected	Detected	Detected	Detected	Detected	Detected	Detected	Not Detected	Detected	Detected	0	A_24_P275828	A_24_P275828	NM_033419	NM_033419	NM_033419	Hs.462971	93210	PGAP3
A_23_P133739	0.0291514	0.00053197	4.07229	up	71.652	56.928	5.49288	12.1581	99.6399	64.0287	7.59236	7.47959	26.6754	9.87336	41.2801	32.0015	6.45193	6.41187	4.06952	4.93912	5.81816	6.18021	3.6634	3.29101	4.34637	3.27611	3.62315	3.51569	Detected	Detected	Not Detected	Detected	Detected	Detected	Not Detected	Not Detected	Detected	Not Detected	Detected	Detected	0	A_23_P133739	A_23_P133739	NM_148959	NM_148959	NM_148959	Hs.669039	135458	HUS1B
A_33_P3327277	0.0373814	0.00187461	4.06474	up	182.385	93.7669	15.3447	10.0371	232.499	176.793	9.30474	22.2754	60.5111	14.8552	79.6142	30.8021	7.53695	6.9537	5.4529	4.65724	6.9313	7.4329	3.94181	4.93508	5.59903	3.83366	5.07939	3.43706	Detected	Detected	Detected	Not Detected	Detected	Detected	Not Detected	Detected	Detected	Not Detected	Detected	Detected	0	A_33_P3327277	A_33_P3327277	NM_001272046	NM_001272046	NM_001272046	Hs.197741	340706	VWA2
A_33_P3372563	0.0285992	0.000463665	4.05901	up	880.966	538.791	51.9428	82.7866	522.064	805.746	42.7019	73.1253	170.656	39.7252	175.863	97.9228	9.47158	9.00316	7.20988	7.75657	8.02215	9.42224	6.35473	6.9282	7.13456	5.57826	6.67135	6.09172	Detected	Detected	Detected	Detected	Detected	Detected	Detected	Detected	Detected	Detected	Detected	Detected	0	A_33_P3372563	A_33_P3372563	NM_033450	NM_033450	NM_033450	Hs.55879	89845	ABCC10
A_23_P22214	0.0258475	0.000259853	4.0557	up	363.441	261.067	71.3767	125.962	537.087	187.089	28.1018	52.3029	134.072	49.8675	230.925	38.1037	8.35775	8.11538	7.66702	8.30759	8.06335	7.50599	5.67763	6.36819	6.77835	6.02853	7.14749	3.89717	Detected	Detected	Detected	Detected	Detected	Detected	Detected	Detected	Detected	Detected	Detected	Detected	0	A_23_P22214	A_23_P22214	NM_004157	NM_004157	NM_004157	Hs.631923	5576	PRKAR2A
A_32_P505133	0.0254975	0.000212412	4.05343	up	45.9959	33.9724	7.62318	6.21868	42.4103	25.7733	7.13617	9.6119	25.0804	3.26428	24.5454	5.93666	5.93322	5.87374	4.49358	4.01757	4.63609	4.95769	3.58604	3.60835	4.2505	2.06123	2.68655	1.60438	Detected	Detected	Not Detected	Not Detected	Detected	Detected	Not Detected	Not Detected	Detected	Not Detected	Detected	Not Detected	0	A_32_P505133	A_32_P505133	NM_001256440	NM_001256440	NM_001256440	Hs.631557	126526	C19orf47
A_33_P3299590	0.0407983	0.00244129	4.04888	up	273.189	321.931	23.0635	56.089	435.566	554.95	28.4103	38.8566	99.1279	26.8893	220.746	47.056	8.01067	8.35609	6.03304	7.2172	7.76967	8.90724	5.69449	5.86684	6.32599	4.84243	7.07348	4.38557	Detected	Detected	Detected	Detected	Detected	Detected	Detected	Detected	Detected	Detected	Detected	Detected	0	A_33_P3299590	A_33_P3299590	NM_001128854	NM_001128854	NM_001128854	Hs.111801	51593	SRRT
A_24_P324368	0.0438834	0.00302165	4.03474	up	42.6198	46.1781	7.01349	22.8055	54.6403	34.3631	3.07981	4.69065	24.1674	8.36989	98.5967	17.827	5.84336	6.18987	4.38702	5.89261	4.99792	5.36238	2.50914	2.78735	4.19288	3.08453	5.54096	2.48344	Detected	Detected	Not Detected	Detected	Detected	Detected	Not Detected	Not Detected	Detected	Not Detected	Detected	Detected	0	A_24_P324368	A_24_P324368	NM_032364	NM_032364	NM_032364	Hs.709320	85406	DNAJC14
A_33_P3289461	0.02738	0.000358531	4.03433	up	257.397	82.6489	15.3455	13.1555	93.9035	29.4155	13.92	22.19	52.8361	4.12264	46.8481	24.5693	7.94145	6.8144	5.45296	5.05298	5.74216	5.14746	4.53674	4.92805	5.39629	2.31408	3.89706	3.00521	Detected	Detected	Detected	Detected	Detected	Detected	Detected	Detected	Detected	Not Detected	Detected	Detected	0	A_33_P3289461	A_33_P3289461	NM_080622	NM_080622	NM_080622	Hs.266774	140701	ABHD16B
A_33_P3334180	0.0215502	2e-05	4.033	up	34.4622	27.2395	17.2189	6.34671	34.7767	15.6793	6.06597	7.66429	18.8426	7.00405	12.8119	12.4032	5.59961	5.65511	5.61384	4.04264	4.3334	4.23594	3.39013	3.32022	3.79895	2.88957	1.95563	2.05492	Detected	Detected	Detected	Not Detected	Detected	Detected	Not Detected	Not Detected	Detected	Not Detected	Not Detected	Not Detected	0	A_33_P3334180	A_33_P3334180	ENST00000473964		AB527144	Hs.170156	9651	PLCH2
A_23_P21057	0.0258353	0.00024609	4.03241	up	287.07	335.482	25.7888	50.4462	646.424	192.05	22.5982	39.709	94.6722	23.7482	129.637	71.0335	8.07314	8.41242	6.19431	7.07122	8.33247	7.53542	5.31843	5.90339	6.2593	4.61797	6.10251	5.34753	Detected	Detected	Detected	Detected	Detected	Detected	Detected	Detected	Detected	Detected	Detected	Detected	0	A_23_P21057	A_23_P21057	NM_052838	NM_052838	NM_052838	Hs.632176	1731	SEPT1
A_33_P3252499	0.0319249	0.000959418	4.02683	up	739.968	650.214	37.7465	204.87	1040.93	368.462	85.4583	61.8093	200.767	44.4325	183.816	75.6905	9.2505	9.25162	6.75094	8.95508	8.99876	8.36655	7.43907	6.6529	7.37817	5.79768	6.75517	5.49258	Detected	Detected	Detected	Detected	Detected	Detected	Detected	Detected	Detected	Detected	Detected	Detected	0	A_33_P3252499	A_33_P3252499	NM_001164496	NM_001164496	NM_001164496	Hs.584936	55779	CFAP44
A_21_P0013240	0.0301209	0.000663633	4.02581	up	80.8455	37.2642	11.969	12.001	89.7942	90.8319	12.0815	13.8299	29.8639	4.48772	73.5138	18.365	6.5915	5.97089	5.10782	4.91868	5.68192	6.60273	4.31668	4.14508	4.52059	2.40829	4.90043	2.52678	Detected	Detected	Not Detected	Not Detected	Detected	Detected	Not Detected	Not Detected	Detected	Not Detected	Detected	Not Detected	0	A_21_P0013240	A_21_P0013240	NM_001199207	NM_001199207	NM_001199207	Hs.647056	9569	GTF2IRD1
A_21_P0012673	0.021928	4.03e-05	4.02143	up	63.8491	78.5957	22.3531	18.1748	132.802	84.1942	13.7816	13.2468	37.468	14.6468	54.8256	35.2057	6.31689	6.75416	5.98738	5.55096	6.17945	6.51105	4.52091	4.07315	4.87004	3.81318	4.25381	3.72256	Detected	Detected	Detected	Detected	Detected	Detected	Detected	Not Detected	Detected	Not Detected	Detected	Detected	0	A_21_P0012673	A_21_P0012673	NM_015160	NM_015160	NM_015160	Hs.495471	23203	PMPCA
A_23_P359457	0.0495442	0.00425571	4.02041	up	198.394	72.5659	757.5	99.415	140.003	161.102	27.6472	84.1919	103.673	108.796	51.3841	36.4418	7.63637	6.66958	10.8482	7.99762	6.24549	7.31478	5.6503	7.15974	6.39087	7.55253	4.10933	3.80525	Detected	Detected	Detected	Detected	Detected	Detected	Detected	Detected	Detected	Detected	Detected	Detected	0	A_23_P359457	A_23_P359457	NM_001303270	NM_001303270	NM_001303270	Hs.367649	146754	DNAH2
A_33_P3400171	0.030849	0.000770267	4.01927	up	5254.32	1846.31	443.91	792.035	2162.94	1563.25	199.258	322.265	837.689	133.121	1074.87	144.725	12.0191	10.6403	10.1608	10.6841	10.071	10.3188	8.69653	9.26775	9.48209	7.92258	9.55959	6.92391	Detected	Detected	Detected	Detected	Detected	Detected	Detected	Detected	Detected	Detected	Detected	Detected	0	A_33_P3400171	A_33_P3400171	NM_001626	NM_001626	NM_001626	Hs.631535	208	AKT2
A_23_P84629	0.0262832	0.000276417	4.01612	up	503.274	666.802	46.8521	148.64	540.077	676.408	48.4448	69.7101	126.999	50.7203	196.865	86.2115	8.7594	9.28218	7.06758	8.53275	8.0735	9.17212	6.55924	6.85635	6.69564	6.06581	6.87448	5.80122	Detected	Detected	Detected	Detected	Detected	Detected	Detected	Detected	Detected	Detected	Detected	Detected	0	A_23_P84629	A_23_P84629	NM_002917	NM_002917	NM_002917	Hs.569700	5986	RFNG
A_33_P3249793	0.0408899	0.00246169	4.01023	up	67.3885	75.2436	3.49357	6.35595	70.4876	50.7398	9.58349	7.62151	28.2476	4.63276	30.8023	18.0589	6.38059	6.70863	3.38224	4.04493	5.3584	5.88854	3.98369	3.31464	4.43408	2.44519	3.06305	2.50058	Detected	Detected	Not Detected	Not Detected	Detected	Detected	Not Detected	Not Detected	Detected	Not Detected	Detected	Detected	0	A_33_P3249793	A_33_P3249793	NM_005938	NM_005938	NM_005938	Hs.584654	4303	FOXO4
A_24_P333019	0.0250229	0.000112315	4.00884	up	249.628	161.929	146.527	48.7206	464.343	96.233	25.1163	66.2998	82.8012	35.2745	153.795	33.0652	7.90582	7.5631	8.6862	7.02031	7.86256	6.67672	5.49442	6.76841	6.06636	5.35403	6.42985	3.5825	Detected	Detected	Detected	Detected	Detected	Detected	Detected	Detected	Detected	Detected	Detected	Detected	0	A_24_P333019	A_24_P333019	NM_007219	NM_007219	NM_007219	Hs.589884	11237	RNF24
A_33_P3264269	0.0489696	0.00413016	4.00555	up	165.893	230.303	18.6377	19.2189	506.539	210.57	9.93902	44.9993	116.883	16.3472	161.044	26.6145	7.41933	7.9663	5.73304	5.63503	7.98252	7.64978	4.03344	6.11114	6.57197	3.98721	6.51638	3.15387	Detected	Detected	Detected	Detected	Detected	Detected	Not Detected	Detected	Detected	Not Detected	Detected	Detected	0	A_33_P3264269	A_33_P3264269	NM_001286072	NM_001286072	NM_001286072	Hs.514941	4343	MOV10
A_33_P3407751	0.0322285	0.000999987	4.00408	up	71.3572	76.3173	9.22249	27.7146	32.5702	46.223	4.24671	9.65739	26.7028	11.8565	48.7093	34.6569	6.44884	6.7244	4.75297	6.19041	4.236	5.76797	2.96644	3.61384	4.34833	3.51195	3.98453	3.68666	Detected	Detected	Not Detected	Detected	Detected	Detected	Not Detected	Not Detected	Detected	Not Detected	Detected	Detected	0	A_33_P3407751	A_33_P3407751	AK126029		AK126029	Hs.640181
A_24_P397294	0.0234302	7.41e-05	3.99764	up	222.549	176.467	39.2103	29.4275	61.8559	87.3333	32.6875	21.5793	74.0856	13.2653	45.4228	41.0105	7.77396	7.66118	6.80283	6.28124	5.17992	6.55574	5.91712	4.88128	5.89806	3.66772	3.82846	4.06733	Detected	Detected	Detected	Detected	Detected	Detected	Detected	Detected	Detected	Not Detected	Detected	Detected	0	A_24_P397294	A_24_P397294	NM_145867	NM_145867	NM_145867	Hs.706741	4056	LTC4S
A_23_P84202	0.0314567	0.000849265	3.98746	up	186.824	70.3037	5.92226	22.8933	125.592	76.9486	13.3668	13.5569	34.1573	15.765	50.4077	31.872	7.56246	6.63556	4.16971	5.89744	6.11183	6.40678	4.47283	4.11126	4.7283	3.92644	4.06457	3.50757	Detected	Detected	Not Detected	Detected	Detected	Detected	Detected	Detected	Detected	Detected	Detected	Detected	0	A_23_P84202	A_23_P84202	NM_024515	NM_024515	NM_024515	Hs.497600	79446	WDR25
A_23_P28068	0.0273858	0.000360383	3.98048	up	112.891	113.783	19.8041	41.3387	91.5152	102.136	27.1794	14.6765	51.2554	16.5072	59.6823	32.9882	6.96559	7.17189	5.81809	6.77986	5.70907	6.7503	5.6251	4.24219	5.34822	4.002	4.44179	3.57783	Detected	Detected	Detected	Detected	Detected	Detected	Detected	Detected	Detected	Detected	Detected	Detected	0	A_23_P28068	A_23_P28068	NM_133644	NM_133644	NM_133644	Hs.334885	84705	GTPBP3
A_33_P3298990	0.021928	4.26e-05	3.97332	up	54.3703	42.9417	15.217	28.8505	51.5695	32.055	11.464	11.5817	22.7848	8.80783	34.3982	32.7301	6.12552	6.11643	5.44091	6.25018	4.9169	5.26687	4.23612	3.87127	4.10207	3.14077	3.2659	3.55861	Detected	Detected	Not Detected	Detected	Detected	Detected	Not Detected	Not Detected	Detected	Not Detected	Detected	Detected	0	A_33_P3298990	A_33_P3298990	NM_014207	NM_014207	NM_014207	Hs.58685	921	CD5
A_33_P3388376	0.0338282	0.00123342	3.97258	up	1173.02	519.454	52.6716	171.391	545.109	1337.83	73.0313	84.9546	212.24	31.0367	217.52	153.051	9.86325	8.95916	7.22987	8.73028	8.08577	10.102	7.19872	7.17582	7.46014	5.10928	7.04983	7.03605	Detected	Detected	Detected	Detected	Detected	Detected	Detected	Detected	Detected	Detected	Detected	Detected	0	A_33_P3388376	A_33_P3388376	NM_001001417	NM_001001417	NM_001001417	Hs.105891	414059	TBC1D3B
A_33_P3293381	0.0258353	0.000233956	3.97056	up	70.9876	55.6186	21.7065	48.3135	169.399	56.0315	6.98892	19.461	56.48	14.4235	76.8808	36.5511	6.44226	6.38523	5.94521	7.00746	6.50631	6.01566	3.56094	4.70586	5.49695	3.79231	4.99987	3.81015	Detected	Detected	Detected	Detected	Detected	Detected	Not Detected	Detected	Detected	Detected	Detected	Detected	0	A_33_P3293381	A_33_P3293381	ENST00000428466				83937	RASSF4
A_33_P3255794	0.0301209	0.000662551	3.96107	up	295.329	186.337	33.9712	45.4922	239.306	461.471	29.948	38.8524	71.4747	33.1181	119.756	47.2441	8.10652	7.72122	6.60026	6.91917	6.96659	8.66016	5.77849	5.86674	5.84336	5.23277	5.94272	4.39451	Detected	Detected	Detected	Detected	Detected	Detected	Detected	Detected	Detected	Detected	Detected	Detected	0	A_33_P3255794	A_33_P3255794	NM_006231	NM_006231	NM_006231	Hs.524871	5426	POLE
A_21_P0002454	0.0250229	0.0001043	3.96099	up	75.2821	34.1528	18.4707	26.3611	155.621	33.9762	13.057	18.1604	38.2825	11.6518	36.268	28.0158	6.50389	5.87982	5.72184	6.11707	6.38819	5.34701	4.43593	4.59441	4.90337	3.48904	3.36499	3.25491	Detected	Detected	Detected	Detected	Detected	Detected	Not Detected	Detected	Detected	Not Detected	Detected	Detected	0	A_21_P0002454	A_21_P0002454	lnc-RAB1A-1:3					lnc-RAB1A-1
A_33_P3406861	0.0434355	0.00294237	3.96038	up	123.709	213.501	6.85145	16.8436	60.9242	19.9158	9.70119	8.06605	31.6192	8.5245	43.3366	35.6596	7.07306	7.87889	4.35672	5.43404	5.15786	4.58639	4.00086	3.38446	4.60896	3.1024	3.72324	3.75321	Detected	Detected	Not Detected	Detected	Detected	Detected	Not Detected	Not Detected	Detected	Not Detected	Detected	Detected	0	A_33_P3406861	A_33_P3406861	NM_001270771	NM_001270771	NM_001270771	Hs.655143	8470	SORBS2
A_24_P320171	0.0284338	0.000413181	3.95548	up	88.7962	105.774	10.826	17.0312	105.242	72.747	6.56334	17.9174	35.7937	16.7562	54.9604	30.0792	6.69748	7.08789	4.97562	5.45194	5.88767	6.33535	3.48483	4.56947	4.79982	4.02782	4.2599	3.39101	Detected	Detected	Not Detected	Detected	Detected	Detected	Not Detected	Detected	Detected	Detected	Detected	Detected	0	A_24_P320171	A_24_P320171	NM_152544	NM_152544	NM_152544	Hs.566191	152992	TRMT44
A_23_P317667	0.0457761	0.00342501	3.95208	up	45.9867	37.5536	3.50583	11.5777	126.427	57.9884	4.22964	6.71957	34.4143	5.92641	55.5251	19.1237	5.93304	5.97989	3.38746	4.86406	6.11988	6.0596	2.95988	3.16671	4.73955	2.71326	4.2818	2.58707	Detected	Detected	Not Detected	Detected	Detected	Detected	Not Detected	Not Detected	Detected	Not Detected	Detected	Not Detected	0	A_23_P317667	A_23_P317667	NM_015259	NM_015259	NM_015259	Hs.14155	23308	ICOSLG
A_33_P3328653	0.0267944	0.000313536	3.94023	up	5099.73	3323.11	587.957	780.32	1971.68	1662.45	307.568	254.952	806.662	92.9228	927.096	435.817	11.9724	11.4395	10.5089	10.6618	9.93475	10.4127	9.30619	8.90769	9.42341	7.25861	9.32487	8.83962	Detected	Detected	Detected	Detected	Detected	Detected	Detected	Detected	Detected	Detected	Detected	Detected	0	A_33_P3328653	A_33_P3328653	NM_014246	NM_014246	NM_014246	Hs.252387	9620	CELSR1
A_33_P3421923	0.0417355	0.00258351	3.9401	up	19.1886	43.7194	2.4533	6.78157	50.581	20.0114	5.12362	2.317	15.7058	2.93967	24.2495	12.7783	4.90191	6.1361	2.64259	4.12635	4.88782	4.59266	3.19725	1.99512	3.53637	1.93677	2.66839	2.08414	Detected	Detected	Not Detected	Not Detected	Detected	Detected	Not Detected	Not Detected	Detected	Not Detected	Not Detected	Not Detected	0	A_33_P3421923	A_33_P3421923	NM_021189	NM_021189	NM_021189	Hs.365689	57863	CADM3
A_33_P3323692	0.0259365	0.000267659	3.93674	up	87.2524	130.359	16.1389	48.9647	95.1508	42.8716	9.41831	14.2403	43.649	21.9198	62.8012	37.0121	6.6789	7.32252	5.5249	7.02837	5.75959	5.66752	3.95959	4.19303	5.10455	4.47619	4.55092	3.83549	Detected	Detected	Detected	Detected	Detected	Detected	Not Detected	Detected	Detected	Detected	Detected	Detected	0	A_33_P3323692	A_33_P3323692	NR_125987	NR_125987	NR_125987		101929626	LOC101929626
A_23_P102364	0.0490279	0.00413927	3.93629	up	1259.23	2044.23	65.4996	175.351	332.884	4039.67	88.1063	72.871	225.054	85.4785	288.663	224.048	9.95928	10.7664	7.54556	8.76138	7.40631	11.7408	7.48844	6.92335	7.54759	7.10335	7.50757	7.74849	Detected	Detected	Detected	Detected	Detected	Detected	Detected	Detected	Detected	Detected	Detected	Detected	0	A_23_P102364	A_23_P102364	NM_019850	NM_019850	NM_019850	Hs.97316	25791	NGEF
A_33_P3332215	0.045702	0.00339765	3.93543	up	7633.49	1596.97	301.74	297.027	3059.44	996.162	133.53	326.091	704.858	204.13	1040.26	84.299	12.4938	10.4393	9.67138	9.45499	10.6	9.71383	8.10917	9.29023	9.2261	8.63278	9.50649	5.74938	Detected	Detected	Detected	Detected	Detected	Detected	Detected	Detected	Detected	Detected	Detected	Detected	0	A_33_P3332215	A_33_P3332215	NM_001044392	NM_001044392	NM_001044392	Hs.89603	4582	MUC1
A_32_P44394	0.0485279	0.00403713	3.93247	up	1274.45	89.0752	60.5064	37.7109	1022.99	381.215	17.4267	44.3374	114.533	60.3349	131.79	112.2	9.97562	6.89731	7.43077	6.64459	8.96773	8.40679	4.89832	6.08819	6.54237	6.41129	6.13484	6.3952	Detected	Detected	Detected	Detected	Detected	Detected	Detected	Detected	Detected	Detected	Detected	Detected	0	A_32_P44394	A_32_P44394	NM_004833	NM_004833	NM_004833	Hs.733411	9447	AIM2
A_33_P3332885	0.0384748	0.00205586	3.92934	up	973.453	371.839	141.955	275.27	653.818	345.048	43.9788	89.8903	352.251	32.7111	406.094	85.6221	9.6076	8.54487	8.64139	9.34647	8.35019	8.28619	6.40094	7.27437	8.21275	5.20941	8.04928	5.78421	Detected	Detected	Detected	Detected	Detected	Detected	Detected	Detected	Detected	Detected	Detected	Detected	0	A_33_P3332885	A_33_P3332885	NM_001197234	NM_001197234	NM_001197234	Hs.159028	11120	BTN2A1
A_19_P00807752	0.0250229	0.000129256	3.92909	up	62.7063	54.9213	8.27443	15.8656	38.1405	21.9226	4.79999	9.31626	17.5824	11.4561	27.3711	28.0116	6.29481	6.37166	4.60173	5.3365	4.47321	4.72775	3.11862	3.56794	3.69653	3.46666	2.85626	3.25448	Detected	Detected	Not Detected	Detected	Detected	Detected	Not Detected	Not Detected	Not Detected	Not Detected	Detected	Detected	0	A_19_P00807752	A_19_P00807752	ENST00000442625	XM_005268309	XM_005268309	Hs.729031	23263	MCF2L
A_23_P128351	0.0258475	0.000264729	3.91669	up	109.248	178.796	30.7303	60.4483	263.084	175.095	11.7542	29.2976	72.1141	22.5296	144.974	53.6328	6.93028	7.67479	6.45089	7.31535	7.08957	7.42176	4.27469	5.38898	5.85669	4.52476	6.32085	4.69885	Detected	Detected	Detected	Detected	Detected	Detected	Not Detected	Detected	Detected	Detected	Detected	Detected	0	A_23_P128351	A_23_P128351	NM_032680	NM_032680	NM_032680	Hs.504534	84766	CRACR2A
A_33_P3253214	0.0250229	9.66e-05	3.91524	up	183.028	76.5783	48.1106	37.1139	331.486	92.3296	26.2516	40.9544	64.0454	21.9957	72.3524	34.0694	7.54062	6.72823	7.1016	6.62297	7.40085	6.62332	5.5677	5.95473	5.68328	4.48164	4.86627	3.64936	Detected	Detected	Detected	Detected	Detected	Detected	Detected	Detected	Detected	Detected	Detected	Detected	0	A_33_P3253214	A_33_P3253214	ENST00000607355		L19779	Hs.530461
A_33_P3313221	0.0286923	0.000476132	3.91445	up	340.183	174.32	27.8862	42.5032	190.868	248.437	18.1037	60.6481	75.1056	27.3767	67.4176	53.2671	8.27285	7.64696	6.30901	6.82068	6.67078	7.85861	4.9571	6.61936	5.91981	4.87495	4.71288	4.68196	Detected	Detected	Detected	Detected	Detected	Detected	Detected	Detected	Detected	Detected	Detected	Detected	0	A_33_P3313221	A_33_P3313221	NM_001242739	NM_001242739	NM_001242739	Hs.20879	51058	ZNF691
A_33_P3310567	0.0280318	0.000381594	3.90915	up	3442.39	4599.77	506.109	1666.02	3301.75	1586.03	163.454	391.8	1449	218.953	928.937	282.398	11.3882	11.8708	10.3402	11.6343	10.7019	10.3426	8.41593	9.57071	10.2811	8.74085	9.3287	8.13964	Detected	Detected	Detected	Detected	Detected	Detected	Detected	Detected	Detected	Detected	Detected	Detected	0	A_33_P3310567	A_33_P3310567	ENST00000616656
A_23_P209700	0.021755	3.5e-05	3.90699	up	825.902	776.111	259.82	350.902	730.015	919.98	119.825	92.6446	281.202	104.549	203.875	129.923	9.38534	9.47122	9.47174	9.65397	8.49692	9.59991	7.95693	7.32307	7.87388	7.48452	6.93676	6.70759	Detected	Detected	Detected	Detected	Detected	Detected	Detected	Detected	Detected	Detected	Detected	Detected	0	A_23_P209700	A_23_P209700	NM_006056	NM_006056	NM_006056	Hs.471619	10316	NMUR1
A_23_P138776	0.0350683	0.00148354	3.90674	up	72.0382	79.9105	16.5723	8.50082	317.922	82.6072	10.291	32.2373	55.4968	10.0156	63.7336	15.3396	6.45785	6.77313	5.5631	4.4263	7.34807	6.49024	4.08095	5.54839	5.46946	3.29303	4.58201	2.28907	Detected	Detected	Detected	Not Detected	Detected	Detected	Not Detected	Detected	Detected	Not Detected	Detected	Detected	0	A_23_P138776	A_23_P138776	NM_001610	NM_001610	NM_001610	Hs.532492	53	ACP2
A_23_P365149	0.0285992	0.000466106	3.90251	up	382.089	176.881	51.8655	39.0867	608.274	280.725	26.4916	82.5335	105.149	22.0876	145.025	49.8734	8.41722	7.66365	7.20861	6.69534	8.24769	8.00722	5.58417	7.1295	6.4109	4.48898	6.32128	4.51849	Detected	Detected	Detected	Detected	Detected	Detected	Detected	Detected	Detected	Detected	Detected	Detected	0	A_23_P365149	A_23_P365149	NM_005881	NM_005881	NM_005881	Hs.513520	10295	BCKDK
A_32_P925529	0.0438834	0.00302268	3.90192	up	399.15	171.939	7.36293	22.8128	66.6038	64.8538	7.04453	20.5562	18.938	33.9573	56.6611	46.387	8.46853	7.63283	4.44907	5.89329	5.28003	6.19516	3.56954	4.79871	3.8079	5.28034	4.32576	4.35154	Detected	Detected	Not Detected	Detected	Detected	Detected	Not Detected	Detected	Detected	Detected	Detected	Detected	0	A_32_P925529	A_32_P925529	ENST00000548895
A_24_P187614	0.0324666	0.00102833	3.89445	up	474.815	105.488	23.9193	39.6894	73.0271	57.8048	27.9404	19.8823	78.5257	8.08039	64.8712	43.5996	8.68798	7.08466	6.08703	6.71627	5.4061	6.05516	5.66882	4.73964	5.98714	3.04707	4.62214	4.20386	Detected	Detected	Detected	Detected	Detected	Detected	Detected	Detected	Detected	Not Detected	Detected	Detected	0	A_24_P187614	A_24_P187614	AK097637		AK097637	Hs.711285	100129648	LOC100129648
A_23_P88904	0.0254975	0.000216104	3.891	up	50.2447	38.5993	15.6934	23.8538	33.3863	32.9596	15.3867	6.52486	32.3232	7.30981	31.7997	21.4624	6.03189	6.00785	5.48485	5.96041	4.27419	5.30727	4.69489	3.13519	4.6459	2.93566	3.12156	2.77241	Detected	Detected	Detected	Detected	Detected	Detected	Detected	Not Detected	Detected	Not Detected	Detected	Detected	0	A_23_P88904	A_23_P88904	NM_002528	NM_002528	NM_002528	Hs.66196	4913	NTHL1
A_33_P3357609	0.0250229	0.00014194	3.89004	up	105.568	66.1115	19.2536	14.1606	561.329	42.3403	15.5055	16.9575	39.0926	11.9746	67.1097	41.1479	6.8925	6.57131	5.77803	5.16123	8.12948	5.65236	4.70721	4.47717	4.93593	3.5285	4.70232	4.07509	Detected	Detected	Detected	Not Detected	Detected	Detected	Not Detected	Detected	Detected	Not Detected	Detected	Detected	0	A_33_P3357609	A_33_P3357609	NM_001160419	NM_001160419	NM_001160419	Hs.302123	81030	ZBP1
A_33_P3338392	0.0215502	1.77e-05	3.88758	up	126.234	93.9232	40.9079	28.4479	220.586	58.688	15.548	19.6555	46.8872	18.9735	69.9883	52.6369	7.09556	6.95545	6.86445	6.22804	6.8628	6.07458	4.71184	4.7223	5.21312	4.23169	4.79542	4.65327	Detected	Detected	Detected	Detected	Detected	Detected	Not Detected	Detected	Detected	Detected	Detected	Detected	0	A_33_P3338392	A_33_P3338392	NM_022115	NM_022115	NM_022115	Hs.473893	63977	PRDM15
A_33_P3267233	0.0285992	0.000460474	3.88546	up	297.491	132.14	39.6245	22.3424	342.331	124.77	23.2645	22.5037	96.9178	12.9013	192.733	35.5669	8.11334	7.33695	6.81798	5.86376	7.44259	6.99788	5.36524	4.95179	6.29297	3.63011	6.83755	3.74631	Detected	Detected	Detected	Detected	Detected	Detected	Detected	Detected	Detected	Not Detected	Detected	Detected	0	A_33_P3267233	A_33_P3267233	CU692315		CU692315
A_21_P0013020	0.0387667	0.00209969	3.88027	up	131.688	228.276	5.69388	43.1958	96.0438	148.204	15.0025	23.0732	37.6885	23.08	63.4865	33.9999	7.14625	7.95439	4.11785	6.84439	5.77117	7.21316	4.65127	4.9954	4.87821	4.56666	4.57401	3.64471	Detected	Detected	Not Detected	Detected	Detected	Detected	Detected	Detected	Detected	Detected	Detected	Detected	0	A_21_P0013020	A_21_P0013020	TCONS_l2_00024090			Hs.590456		XLOC_l2_012432
A_24_P370156	0.0284338	0.000420553	3.88006	up	165.249	66.9213	33.4358	31.5143	440.279	124.479	13.5862	41.3021	74.6052	22.4832	87.7737	36.6881	7.414	6.58335	6.57755	6.38819	7.78383	6.99499	4.49912	5.9696	5.90961	4.52091	5.28828	3.81794	Detected	Detected	Detected	Detected	Detected	Detected	Detected	Detected	Detected	Detected	Detected	Detected	0	A_24_P370156	A_24_P370156	NM_000528	NM_000528	NM_000528	Hs.356769	4125	MAN2B1
A_23_P158533	0.033018	0.00110116	3.87706	up	142.828	101.147	16.0386	20.3303	167.762	108.437	17.6751	14.3865	72.105	16.5481	74.4797	27.0462	7.24576	7.03752	5.51655	5.72238	6.4931	6.82499	4.92078	4.20946	5.85662	4.00617	4.93036	3.18714	Detected	Detected	Detected	Detected	Detected	Detected	Detected	Detected	Detected	Detected	Detected	Detected	0	A_23_P158533	A_23_P158533	NM_021008	NM_021008	NM_021008	Hs.243994	10522	DEAF1
A_21_P0010758	0.0265471	0.00030721	3.87637	up	36.0745	61.1597	9.28549	18.4937	26.3473	24.4142	4.36238	8.65232	34.0449	10.6271	14.9205	23.0916	5.65181	6.48728	4.76193	5.57659	3.91919	4.8835	3.0031	3.47671	4.72415	3.36499	2.08672	2.89639	Detected	Detected	Not Detected	Detected	Detected	Detected	Not Detected	Not Detected	Detected	Not Detected	Not Detected	Detected	0	A_21_P0010758	A_21_P0010758	NM_001194986	NM_001194986	NM_001194986	Hs.61504	388630	TRABD2B
A_33_P3335391	0.02321	6.95e-05	3.87573	up	64.0639	80.2532	41.3879	30.7953	77.1579	122.006	18.9365	13.2834	45.9533	21.249	54.8476	41.5009	6.32111	6.77835	6.88449	6.35386	5.48038	6.97002	5.02801	4.07685	5.18315	4.42188	4.2548	4.09672	Detected	Detected	Detected	Detected	Detected	Detected	Detected	Not Detected	Detected	Detected	Detected	Detected	0	A_33_P3335391	A_33_P3335391	NM_001039999	NM_001039999	NM_001039999	Hs.710727	644815	FAM83G
A_33_P3321642	0.0319114	0.000953108	3.87394	up	246.649	182.588	29.7973	29.027	416.66	335.945	28.2425	42.3456	87.7147	34.0034	82.1321	43.8786	7.89472	7.69903	6.40404	6.2603	7.71058	8.24882	5.68519	6.00854	6.15189	5.28289	5.1483	4.21787	Detected	Detected	Detected	Detected	Detected	Detected	Detected	Detected	Detected	Detected	Detected	Detected	0	A_33_P3321642	A_33_P3321642	NM_024915	NM_024915	NM_024915	Hs.661088	79977	GRHL2
A_23_P112548	0.0236517	8.42e-05	3.87055	up	82.5228	85.523	38.667	53.0186	105.537	81.741	23.4376	16.5751	48.4033	16.1254	61.5905	49.2559	6.61572	6.85096	6.78272	7.13938	5.89155	6.47831	5.3764	4.43906	5.26429	3.96336	4.51035	4.48995	Detected	Detected	Detected	Detected	Detected	Detected	Detected	Detected	Detected	Detected	Detected	Detected	0	A_23_P112548	A_23_P112548	NM_031219	NM_031219	NM_031219	Hs.7739	81932	HDHD3
A_33_P3296846	0.0314567	0.000857058	3.87002	up	34.537	67.5822	22.5202	12.2383	208.76	300.72	16.8942	11.5715	48.0203	13.1346	64.8237	41.0788	5.60228	6.59381	5.99721	4.94885	6.78885	8.09944	4.84963	3.86966	5.25132	3.65459	4.62013	4.07106	Detected	Detected	Detected	Not Detected	Detected	Detected	Detected	Not Detected	Detected	Not Detected	Detected	Detected	0	A_33_P3296846	A_33_P3296846	NM_001290094	NM_001290094	NM_001290094	Hs.161985	56649	TMPRSS4
A_23_P390116	0.0354749	0.00155855	3.86761	up	166.905	134.212	23.6723	44.5696	344.392	311.037	13.4531	24.0096	84.6839	20.2203	222.268	50.7808	7.42676	7.3554	6.07181	6.89075	7.45027	8.14407	4.48164	5.06057	6.09942	4.33874	7.08354	4.56649	Detected	Detected	Detected	Detected	Detected	Detected	Not Detected	Detected	Detected	Detected	Detected	Detected	0	A_23_P390116	A_23_P390116	NM_153023	NM_153023	NM_153023	Hs.595391	221178	SPATA13
A_33_P3222380	0.0373447	0.00186636	3.86696	up	388.795	76.6063	116.402	41.0853	340.97	1637.25	60.0472	55.0206	77.2818	38.9961	115.083	82.7048	8.43927	6.7286	8.36005	6.77143	7.43794	10.392	6.89621	6.45335	5.96356	5.54447	5.8599	5.70462	Detected	Detected	Detected	Detected	Detected	Detected	Detected	Detected	Detected	Detected	Detected	Detected	0	A_33_P3222380	A_33_P3222380	NM_138420	NM_138420	NM_138420	Hs.441783	113146	AHNAK2
A_23_P346093	0.0304435	0.000709047	3.86289	up	165.222	55.0408	20.7436	18.8345	442.927	167.387	16.2695	25.5262	76.814	14.275	75.4344	41.458	7.41367	6.37445	5.8824	5.6041	7.79096	7.36245	4.78309	5.16166	5.9537	3.77798	4.95926	4.09427	Detected	Detected	Detected	Detected	Detected	Detected	Detected	Detected	Detected	Not Detected	Detected	Detected	0	A_23_P346093	A_23_P346093	NM_152468	NM_152468	NM_152468	Hs.592102	147138	TMC8
A_23_P654	0.0301209	0.000668367	3.86099	up	775.673	732.379	38.6229	66.7425	371.545	101.225	40.4495	65.1991	137.493	25.3656	171.192	46.3558	9.30773	9.39305	6.78146	7.45113	7.55426	6.7396	6.26791	6.74122	6.81376	4.73578	6.62401	4.35073	Detected	Detected	Detected	Detected	Detected	Detected	Detected	Detected	Detected	Detected	Detected	Detected	0	A_23_P654	A_23_P654	NM_003443	NM_003443	NM_003443	Hs.433764	7709	ZBTB17
A_33_P3230748	0.0331368	0.00110745	3.85926	up	142.195	20.6123	16.2107	9.31935	190.932	65.4727	10.1536	22.5017	32.4585	13.3088	44.0616	21.8321	7.23992	5.38609	5.53109	4.55415	6.67112	6.20589	4.06253	4.95136	4.65225	3.67305	3.75896	2.80018	Detected	Detected	Detected	Not Detected	Detected	Detected	Not Detected	Detected	Detected	Not Detected	Detected	Detected	0	A_33_P3230748	A_33_P3230748	lnc-CEACAM18-2:1		DB453801	Hs.642300		lnc-CEACAM18-2
A_23_P217028	0.0380384	0.00200308	3.85197	up	86.2168	91.6334	5.42028	45.2186	58.2511	91.6237	19.2364	13.8457	32.3964	9.76394	44.676	34.6853	6.66595	6.92735	4.05215	6.91047	5.09257	6.615	5.05379	4.14753	4.64918	3.25945	3.79097	3.689	Detected	Detected	Not Detected	Detected	Detected	Detected	Detected	Detected	Detected	Not Detected	Detected	Detected	0	A_23_P217028	A_23_P217028	NM_001008563	NM_001008563	NM_001008563	Hs.5452	10868	USP20
A_19_P00322181	0.0215502	2.68e-05	3.84719	up	33.4924	25.013	11.835	11.1071	53.2541	29.4958	10.0397	8.34616	13.1573	7.69302	35.963	16.4323	5.56424	5.56604	5.09292	4.80657	4.9633	5.15159	4.04639	3.4282	3.28865	2.99093	3.34941	2.37827	Detected	Detected	Not Detected	Detected	Detected	Detected	Not Detected	Not Detected	Not Detected	Not Detected	Detected	Not Detected	0	A_19_P00322181	A_19_P00322181	lnc-C9orf50-2:1					lnc-C9orf50-2
A_33_P3424864	0.0342234	0.00131256	3.84052	up	17.5726	37.8106	4.43162	2.0191	29.7162	29.2782	4.36904	2.46026	13.5785	2.6141	8.70944	16.252	4.79211	5.9865	3.77894	1.75921	4.09566	5.14068	3.00569	2.05968	3.33005	1.43032	1.71777	2.36178	Detected	Detected	Not Detected	Not Detected	Detected	Detected	Not Detected	Not Detected	Not Detected	Not Detected	Not Detected	Not Detected	0	A_33_P3424864	A_33_P3424864	THC2551759
A_23_P363365	0.0387667	0.00210365	3.83922	up	1259.34	1898.8	151.873	387.241	495.166	1752.97	182.899	88.4969	380.588	64.8855	376.495	177.17	9.96022	10.6768	8.73828	9.77675	7.95143	10.497	8.57596	7.24811	8.32486	6.55622	7.93008	7.32036	Detected	Detected	Detected	Detected	Detected	Detected	Detected	Detected	Detected	Detected	Detected	Detected	0	A_23_P363365	A_23_P363365	NM_016568	NM_016568	NM_016568	Hs.170146	51289	RXFP3
A_33_P3340294	0.0258353	0.000243686	3.82844	up	200.538	100.544	27.8461	33.4942	245.564	185.149	20.9731	16.6647	84.8873	25.685	84.9439	51.8887	7.64907	7.03065	6.30717	6.4803	6.99788	7.49313	5.19357	4.44733	6.10251	4.75914	5.21737	4.61774	Detected	Detected	Detected	Detected	Detected	Detected	Detected	Detected	Detected	Detected	Detected	Detected	0	A_33_P3340294	A_33_P3340294	NM_053043	NM_053043	NM_053043	Hs.591815	155435	RBM33
A_33_P3287879	0.0392009	0.0021784	3.82294	up	521.105	250.212	279.305	269.401	1861.38	1603.96	76.9773	242.053	236.711	81.777	212.359	123.45	8.80444	8.06646	9.57071	9.31443	9.85438	10.3624	7.27968	8.83377	7.62028	7.02238	7.00874	6.59985	Detected	Detected	Detected	Detected	Detected	Detected	Detected	Detected	Detected	Detected	Detected	Detected	0	A_33_P3287879	A_33_P3287879	NM_003536	NM_003536	NM_003536	Hs.591778	8357	HIST1H3H
A_23_P28761	0.0381982	0.00202088	3.8224	up	67.1022	94.8919	9.57448	18.0545	97.7892	63.0529	5.82345	12.8628	49.2081	9.55054	82.5889	24.3425	6.37514	6.96744	4.80526	5.54079	5.79575	6.16148	3.34405	4.02749	5.28792	3.23374	5.15834	2.98745	Detected	Detected	Not Detected	Detected	Detected	Detected	Not Detected	Detected	Detected	Not Detected	Detected	Detected	0	A_23_P28761	A_23_P28761	NM_001030004	NM_001030004	NM_001030004	Hs.116462	3172	HNF4A
A_23_P119634	0.0273775	0.000354008	3.81133	up	46.1707	39.4368	15.7155	16.7521	83.2253	77.4398	24.0609	7.83494	28.7193	8.7933	45.1826	25.8465	5.93663	6.02762	5.48732	5.42697	5.58376	6.41391	5.42516	3.34953	4.46066	3.13869	3.81783	3.10258	Detected	Detected	Detected	Detected	Detected	Detected	Detected	Not Detected	Detected	Not Detected	Detected	Detected	0	A_23_P119634	A_23_P119634	NM_007000	NM_007000	NM_007000	Hs.159309	11045	UPK1A
A_24_P389994	0.0497283	0.00428861	3.80621	up	111.139	77.7795	10.473	19.0732	237.383	136.801	8.16395	20.6039	59.8687	14.8596	125.889	20.8927	6.94886	6.74443	4.93046	5.62294	6.95678	7.11417	3.75985	4.80304	5.58182	3.83399	6.04303	2.72578	Detected	Detected	Not Detected	Detected	Detected	Detected	Not Detected	Detected	Detected	Not Detected	Detected	Detected	0	A_24_P389994	A_24_P389994	NM_023018	NM_023018	NM_023018	Hs.654792	65220	NADK
A_23_P57379	0.0346866	0.00139795	3.80274	up	34.3593	22.8886	9.31768	8.60318	31.0401	128.932	11.1383	3.65175	31.9054	6.76207	26.6265	23.5786	5.59592	5.48372	4.76675	4.4439	4.16468	7.04034	4.19275	2.52186	4.62424	2.84987	2.81146	2.93291	Detected	Detected	Not Detected	Not Detected	Detected	Detected	Not Detected	Not Detected	Detected	Not Detected	Detected	Detected	0	A_23_P57379	A_23_P57379	NM_003504	NM_003504	NM_003504	Hs.474217	8318	CDC45
A_21_P0012756	0.0250229	0.000176318	3.8022	up	94.6794	94.6872	49.9937	52.5933	65.5467	54.13	10.995	14.1406	52.5846	23.381	67.8084	52.106	6.77032	6.96437	7.15664	7.12994	5.25867	5.97067	4.17258	4.18297	5.38935	4.58986	4.72625	4.62857	Detected	Detected	Detected	Detected	Detected	Detected	Not Detected	Detected	Detected	Detected	Detected	Detected	0	A_21_P0012756	A_21_P0012756	ENST00000505269				100506013	APELA
A_21_P0011872	0.0250229	0.000145979	3.80099	up	187.921	111.414	18.2478	29.6818	48.4746	194.722	20.0235	21.1708	30.109	18.1063	52.9224	53.846	7.57013	7.14561	5.70391	6.2954	4.82644	7.55116	5.11594	4.85055	4.53388	4.15315	4.1739	4.70698	Detected	Detected	Detected	Detected	Detected	Detected	Detected	Detected	Detected	Detected	Detected	Detected	0	A_21_P0011872	A_21_P0011872	NM_001286811	NM_001286811			100996693	LOC100996693
A_24_P203689	0.0290935	0.00050633	3.80029	up	68.3825	102.111	23.4955	59.1915	124.312	95.3831	16.5312	22.5675	67.7513	18.4756	71.7036	30.7504	6.39847	7.04689	6.06062	7.28884	6.09732	6.66478	4.81256	4.9571	5.76463	4.18718	4.84627	3.43253	Detected	Detected	Detected	Detected	Detected	Detected	Detected	Detected	Detected	Detected	Detected	Detected	0	A_24_P203689	A_24_P203689	NM_198525	NM_198525	NM_198525	Hs.513134	374654	KIF7
A_23_P385835	0.0272478	0.000351124	3.79742	up	213.788	63.8909	21.2664	16.544	62.2634	30.1047	9.5806	14.7444	38.5271	11.6915	55.584	31.4464	7.72669	6.53624	5.91736	5.4053	5.18912	5.17894	3.98306	4.25043	4.91296	3.49279	4.28396	3.48033	Detected	Detected	Detected	Detected	Detected	Detected	Not Detected	Detected	Detected	Not Detected	Detected	Detected	0	A_23_P385835	A_23_P385835	NM_018971	NM_018971	NM_018971	Hs.591653	2850	GPR27
A_23_P120566	0.0273858	0.000361493	3.79612	up	1278.16	714.543	102.547	82.5983	2473.97	664.244	61.2436	77.0183	224.495	82.3877	486.728	107.772	9.98101	9.36104	8.17222	7.75387	10.2817	9.15207	6.9263	7.01488	7.54358	7.03616	8.32921	6.30467	Detected	Detected	Detected	Detected	Detected	Detected	Detected	Detected	Detected	Detected	Detected	Detected	0	A_23_P120566	A_23_P120566	NM_001042576	NM_001042576	NM_001042576	Hs.472213	6238	RRBP1
A_21_P0014030	0.0346445	0.0013911	3.79595	up	77.6633	105.362	9.68166	9.38959	176.989	92.0638	11.018	12.4793	47.3643	9.66134	70.73	27.1562	6.54329	7.08295	4.81997	4.5656	6.56626	6.62031	4.17661	3.98516	5.22926	3.24623	4.81873	3.19563	Detected	Detected	Not Detected	Not Detected	Detected	Detected	Not Detected	Not Detected	Detected	Not Detected	Detected	Detected	0	A_21_P0014030	A_21_P0014030	NM_001193466	NM_001193466	NM_001193466	Hs.648744	284058	KANSL1
A_21_P0010601	0.0291273	0.000529738	3.78623	up	841.546	1054.16	101.1	149.604	345.117	375.208	65.7618	61.3841	245.173	42.1843	187.503	115.467	9.41377	9.86076	8.15252	8.54188	7.45243	8.39083	7.03312	6.64002	7.66997	5.69841	6.79146	6.45463	Detected	Detected	Detected	Detected	Detected	Detected	Detected	Detected	Detected	Detected	Detected	Detected	0	A_21_P0010601	A_21_P0010601	NM_014675	NM_014675	NM_014675	Hs.309403	9696	CROCC
A_33_P3345586	0.0258353	0.000245712	3.78452	up	149.676	179.216	36.2345	81.381	71.2102	37.8422	19.51	20.4334	69.5428	23.9868	54.5971	43.5236	7.30294	7.6782	6.69163	7.73263	5.37237	5.49277	5.0758	4.78836	5.80105	4.63754	4.24677	4.20037	Detected	Detected	Detected	Detected	Detected	Detected	Detected	Detected	Detected	Detected	Detected	Detected	0	A_33_P3345586	A_33_P3345586	NM_001194	NM_001194	NM_001194	Hs.124161	610	HCN2
A_23_P83634	0.02691	0.00033539	3.77939	up	184.574	251.808	41.483	80.3867	196.741	141.558	21.4508	25.8927	95.7553	25.7311	119.467	66.3489	7.55035	8.07333	6.88763	7.71407	6.70792	7.15778	5.23161	5.18735	6.27609	4.7621	5.93827	5.18674	Detected	Detected	Detected	Detected	Detected	Detected	Detected	Detected	Detected	Detected	Detected	Detected	0	A_23_P83634	A_23_P83634	NM_001139	NM_001139	NM_001139	Hs.136574	242	ALOX12B
A_24_P400573	0.032383	0.00101089	3.77793	up	309.123	196.446	45.3452	39.0832	1261.45	622.156	31.398	55.1598	157.045	25.9191	253.04	63.6544	8.15736	7.78588	7.0179	6.69527	9.27161	9.06412	5.85522	6.45809	7.01124	4.77439	7.29932	5.08831	Detected	Detected	Detected	Detected	Detected	Detected	Detected	Detected	Detected	Detected	Detected	Detected	0	A_24_P400573	A_24_P400573	NM_152468	NM_152468	NM_152468	Hs.592102	147138	TMC8
A_24_P306561	0.0358576	0.00165041	3.77749	up	2600.81	2963.48	304.957	842.981	4286.99	1740.27	141.995	356.648	1102.8	149.449	1820.53	137.124	10.9966	11.2869	9.68576	10.7664	11.1322	10.4865	8.20539	9.41808	9.89036	8.12561	10.3939	6.81648	Detected	Detected	Detected	Detected	Detected	Detected	Detected	Detected	Detected	Detected	Detected	Detected	0	A_24_P306561	A_24_P306561	NM_014972	NM_014972	NM_014972	Hs.415342	22980	TCF25
A_23_P379630	0.0285545	0.000454074	3.77538	up	328.611	79.3803	33.7516	42.8999	354.245	306.582	34.2022	32.7938	88.9561	26.0465	98.77	48.6707	8.22645	6.76605	6.5905	6.83373	7.48883	8.12429	5.98921	5.57792	6.17209	4.78309	5.54553	4.46228	Detected	Detected	Detected	Detected	Detected	Detected	Detected	Detected	Detected	Detected	Detected	Detected	0	A_23_P379630	A_23_P379630	NM_138570	NM_138570	NM_138570	Hs.352240	124565	SLC38A10
A_23_P143247	0.0495558	0.0042607	3.77351	up	200.761	226.46	17.4306	129.443	597.956	1029.06	32.5712	43.7422	97.1394	64.1099	143.197	60.0133	7.65144	7.94492	5.63551	8.34236	8.21864	9.75991	5.91082	6.06389	6.29715	6.53465	6.29844	4.95239	Detected	Detected	Detected	Detected	Detected	Detected	Detected	Detected	Detected	Detected	Detected	Detected	0	A_23_P143247	A_23_P143247	NM_173485	NM_173485	NM_173485	Hs.473117	128553	TSHZ2
A_23_P66110	0.0300205	0.000655497	3.76951	up	1513.79	1331.83	170.07	139.663	1200.8	529.359	65.7173	153.04	475.04	60.5946	493.674	83.6873	10.2143	10.1834	8.89505	8.44575	9.2054	8.84278	7.03122	8.12604	8.63809	6.42021	8.35303	5.73184	Detected	Detected	Detected	Detected	Detected	Detected	Detected	Detected	Detected	Detected	Detected	Detected	0	A_23_P66110	A_23_P66110	NM_000548	NM_000548	NM_000548	Hs.90303	7249	TSC2
A_33_P3402918	0.0334426	0.00115413	3.76714	up	115.768	66.9104	10.5363	12.6939	172.201	66.1388	12.1691	24.1393	54.5467	6.2866	55.502	22.9679	6.99523	6.58303	4.93919	5.00164	6.52831	6.21801	4.32645	5.06949	5.44486	2.77653	4.28052	2.88675	Detected	Detected	Not Detected	Not Detected	Detected	Detected	Not Detected	Detected	Detected	Not Detected	Detected	Detected	0	A_33_P3402918	A_33_P3402918	NM_007254	NM_007254	NM_007254	Hs.78016	11284	PNKP
A_23_P107735	0.0295855	0.000594345	3.76692	up	2929.46	1369.68	1874.75	2503.09	2556.93	491.604	292.791	254.626	726.353	283.644	346.187	428.98	11.1667	10.2196	11.9968	12.1862	10.3367	8.74518	9.24534	8.90652	9.27199	9.13369	7.7964	8.8169	Detected	Detected	Detected	Detected	Detected	Detected	Detected	Detected	Detected	Detected	Detected	Detected	0	A_23_P107735	A_23_P107735	NM_001783	NM_001783	NM_001783	Hs.631567	973	CD79A
A_24_P291826	0.0250229	0.000160137	3.76488	up	49.4247	116.243	14.3011	27.7502	256.44	31.3948	11.2283	17.3965	32.4287	10.6981	115.987	23.7204	6.01482	7.19621	5.35392	6.1927	7.05488	5.23653	4.20443	4.52198	4.6512	3.37473	5.87703	2.94406	Detected	Detected	Detected	Detected	Detected	Detected	Not Detected	Detected	Detected	Not Detected	Detected	Detected	0	A_24_P291826	A_24_P291826	NM_001009991	NM_001009991	NM_001009991	Hs.436977	94120	SYTL3
A_33_P3371889	0.0299502	0.000644697	3.75806	up	69.0859	118.405	30.9206	19.6333	104.402	110.663	6.42562	46.9638	78.9787	15.5628	53.9748	28.0887	6.4109	7.21746	6.46112	5.6687	5.87695	6.84788	3.45776	6.18478	5.99597	3.90675	4.21827	3.25955	Detected	Detected	Detected	Detected	Detected	Detected	Not Detected	Detected	Detected	Not Detected	Detected	Detected	0	A_33_P3371889	A_33_P3371889	NM_014840	NM_014840	NM_014840	Hs.524692	9891	NUAK1
A_23_P372096	0.0215502	2.71e-05	3.75533	up	43.9061	44.3378	18.2162	19.5545	69.0769	25.6894	7.40786	12.708	28.2538	12.006	45.5561	21.5016	5.87846	6.15021	5.70099	5.66266	5.33082	4.95239	3.63472	4.01167	4.43454	3.53213	3.83286	2.77598	Detected	Detected	Detected	Detected	Detected	Detected	Not Detected	Detected	Detected	Not Detected	Detected	Detected	0	A_23_P372096	A_23_P372096	ENST00000326071		AK097804	Hs.729596	140688	NOL4L
A_23_P157022	0.0365434	0.00175858	3.75422	up	212.741	135.224	26.6367	30.3898	72.5334	917.106	19.0756	33.5243	63.4373	27.5519	69.3304	67.1458	7.72047	7.36468	6.24013	6.33311	5.39754	9.59531	5.04026	5.61384	5.66897	4.88637	4.7751	5.21561	Detected	Detected	Detected	Detected	Detected	Detected	Detected	Detected	Detected	Detected	Detected	Detected	0	A_23_P157022	A_23_P157022	NM_152411	NM_152411	NM_152411	Hs.729572	136051	ZNF786
A_23_P93105	0.0286923	0.000475478	3.7357	up	81.557	56.0085	13.3225	32.7704	283.659	59.2284	5.52684	22.0584	45.1393	15.4164	80.153	43.8745	6.60153	6.39309	5.25724	6.44685	7.18813	6.08661	3.28385	4.91815	5.15763	3.89259	5.09523	4.21772	Detected	Detected	Detected	Detected	Detected	Detected	Not Detected	Detected	Detected	Detected	Detected	Detected	0	A_23_P93105	A_23_P93105	NM_002043	NM_002043	NM_002043	Hs.719891	2570	GABRR2
A_33_P3351290	0.0418775	0.00261119	3.73089	up	28.1107	24.4567	10.7944	15.9795	561.977	23.4771	9.03911	7.00965	34.3112	11.5662	37.95	39.8391	5.35495	5.54423	4.97182	5.34734	8.13159	4.82697	3.89859	3.2168	4.73508	3.47933	3.44946	4.00053	Detected	Detected	Not Detected	Detected	Detected	Detected	Not Detected	Not Detected	Detected	Not Detected	Detected	Detected	0	A_33_P3351290	A_33_P3351290	ENST00000509591		AK057549		51237	MZB1
A_23_P151150	0.0236517	8.04e-05	3.72931	up	86.3761	49.0353	29.1629	31.6293	108.716	106.104	12.6913	13.5876	53.652	17.9492	69.1848	43.3362	6.6681	6.25512	6.37549	6.39349	5.92901	6.79765	4.39096	4.11485	5.4189	4.14011	4.77078	4.1898	Detected	Detected	Detected	Detected	Detected	Detected	Not Detected	Detected	Detected	Detected	Detected	Detected	0	A_23_P151150	A_23_P151150	NM_202002	NM_202002	NM_202002	Hs.239	2305	FOXM1
A_23_P204696	0.0473368	0.00374486	3.728	up	2919.92	683.665	73.5862	121.835	3510.25	985.433	91.1226	175.822	472.402	56.5631	472.285	116.184	11.1602	9.31498	7.70845	8.26257	10.8059	9.69263	7.54078	8.346	8.63007	6.28595	8.28359	6.46799	Detected	Detected	Detected	Detected	Detected	Detected	Detected	Detected	Detected	Detected	Detected	Detected	0	A_23_P204696	A_23_P204696	NM_004064	NM_004064	NM_004064	Hs.238990	1027	CDKN1B
A_24_P88565	0.0284338	0.000428587	3.72376	up	108.265	36.1998	42.3203	21.8733	223.554	104.742	10.5681	21.9974	50.6797	26.7955	96.2951	27.2388	6.92069	5.94023	6.91527	5.83196	6.87982	6.78183	4.11785	4.91322	5.33238	4.83627	5.4884	3.20113	Detected	Detected	Detected	Detected	Detected	Detected	Not Detected	Detected	Detected	Detected	Detected	Detected	0	A_24_P88565	A_24_P88565	NM_018845	NM_018845	NM_018845	Hs.292154	55974	SLC50A1
A_33_P3268695	0.0250229	0.000130033	3.72322	up	70.1242	96.4671	29.3897	34.3111	78.584	61.3404	16.2438	20.6337	68.5701	13.0123	45.1128	35.507	6.42726	6.98367	6.38514	6.51145	5.50681	6.12914	4.78037	4.80585	5.78135	3.64087	3.81386	3.74185	Detected	Detected	Detected	Detected	Detected	Detected	Detected	Detected	Detected	Not Detected	Detected	Detected	0	A_33_P3268695	A_33_P3268695	NM_032772	NM_032772	NM_032772	Hs.195710	84858	ZNF503
A_19_P00319028	0.0351934	0.00150722	3.72143	up	217.467	365.172	29.0457	66.1605	203.99	262.96	37.7711	23.9737	78.5961	21.1058	162.39	67.6602	7.74697	8.5208	6.36807	7.43834	6.75569	7.9266	6.15931	5.05833	5.98848	4.41027	6.53125	5.2337	Detected	Detected	Detected	Detected	Detected	Detected	Detected	Detected	Detected	Detected	Detected	Detected	0	A_19_P00319028	A_19_P00319028	NM_001145664	NM_001145664	NM_001145664	Hs.662488	731220	RFX8
A_24_P397150	0.0284338	0.000410447	3.72136	up	287.314	296.483	25.2618	49.3268	267.204	128.981	30.2537	31.5035	83.6	18.9059	113.458	58.1114	8.07566	8.26449	6.1634	7.03889	7.11114	7.04085	5.79494	5.51062	6.08001	4.22543	5.8298	4.87863	Detected	Detected	Detected	Detected	Detected	Detected	Detected	Detected	Detected	Detected	Detected	Detected	0	A_24_P397150	A_24_P397150	NM_005255	NM_005255	NM_005255	Hs.369607	2580	GAK
A_33_P3320499	0.0358576	0.00165213	3.71974	up	413.84	441.309	35.8217	82.3588	533.667	381.883	37.5393	52.6449	146.932	27.9592	278.806	60.7698	8.51593	8.75547	6.67552	7.7494	8.05496	8.4089	6.14809	6.37671	6.9155	4.91488	7.45243	4.98135	Detected	Detected	Detected	Detected	Detected	Detected	Detected	Detected	Detected	Detected	Detected	Detected	0	A_33_P3320499	A_33_P3320499	NM_030665	NM_030665	NM_030665	Hs.655395	10743	RAI1
A_33_P3342561	0.0441322	0.00310123	3.70732	up	36.5072	53.3617	2.81519	3.28412	28.5521	14.4897	6.99285	2.82625	16.9799	3.60632	9.99485	5.77207	5.6645	6.34122	2.99154	3.17482	4.03605	4.12375	3.56209	2.23169	3.6445	2.16567	1.79196	1.5937	Detected	Detected	Not Detected	Not Detected	Detected	Detected	Not Detected	Not Detected	Detected	Not Detected	Not Detected	Not Detected	0	A_33_P3342561	A_33_P3342561	NM_031220	NM_031220	NM_031220	Hs.183983	83394	PITPNM3
A_33_P3405769	0.0405224	0.00240323	3.69856	up	1634.31	1454.63	239.341	682.47	665.993	1399.07	182.87	122.199	495.524	68.6949	606.396	176.039	10.3149	10.3021	9.36764	10.5001	8.376	10.1668	8.57542	7.77381	8.70004	6.67018	8.67719	7.3091	Detected	Detected	Detected	Detected	Detected	Detected	Detected	Detected	Detected	Detected	Detected	Detected	0	A_33_P3405769	A_33_P3405769	NM_001135686	NM_001135686	NM_001135686	Hs.694674	441864	TARM1
A_19_P00322173	0.0365401	0.00175789	3.69581	up	1978.65	3543.12	159.482	1028.8	1811.77	2503.66	140.833	291.985	653.177	125.094	869.236	264.231	10.6086	11.5165	8.80797	11.0106	9.8138	11.0383	8.19145	9.11858	9.11343	7.80539	9.22352	8.02807	Detected	Detected	Detected	Detected	Detected	Detected	Detected	Detected	Detected	Detected	Detected	Detected	0	A_19_P00322173	A_19_P00322173	lnc-COL5A1-1:1			Hs.454101		lnc-COL5A1-1
A_33_P3228564	0.0308269	0.000748169	3.69307	up	793.625	309.508	472.871	442.721	1044.33	157.972	67.9229	80.4864	277.206	52.5884	377.693	132.287	9.33833	8.31274	10.2537	9.94243	9.00603	7.29115	7.08101	7.08496	7.85159	6.1361	7.93572	6.74604	Detected	Detected	Detected	Detected	Detected	Detected	Detected	Detected	Detected	Detected	Detected	Detected	0	A_33_P3228564	A_33_P3228564	NM_001144875	NM_001144875	NM_001144875	Hs.720849	79930	DOK3
A_24_P185029	0.0470975	0.00368916	3.69244	up	1052.12	422.517	37.8432	72.0649	499.335	400.728	37.8202	83.8773	193.671	47.9279	180.257	50.3986	9.71152	8.70052	6.75327	7.55791	7.96211	8.47411	6.16142	7.15396	7.32345	5.94757	6.72013	4.54546	Detected	Detected	Detected	Detected	Detected	Detected	Detected	Detected	Detected	Detected	Detected	Detected	0	A_24_P185029	A_24_P185029	NM_015503	NM_015503	NM_015503	Hs.15744	25970	SH2B1
A_24_P336983	0.0439602	0.00306144	3.69222	up	313.085	592.292	25.2411	72.886	1103.41	93.963	42.7215	40.2525	184.226	22.2888	155.007	60.6478	8.17222	9.12203	6.16214	7.57556	9.08748	6.64555	6.35558	5.92704	7.24834	4.50618	6.44353	4.97737	Detected	Detected	Detected	Detected	Detected	Detected	Detected	Detected	Detected	Detected	Detected	Detected	0	A_24_P336983	A_24_P336983	NM_144575	NM_144575	NM_144575	Hs.660911	92291	CAPN13
A_32_P191786	0.0319607	0.000967473	3.69114	up	170.053	178.004	16.4272	25.0744	159.404	156.194	14.0046	20.9457	62.0884	27.5566	74.4277	44.8642	7.45157	7.66897	5.54994	6.0372	6.42212	7.27688	4.54539	4.83196	5.63831	4.88681	4.9287	4.27112	Detected	Detected	Detected	Detected	Detected	Detected	Detected	Detected	Detected	Detected	Detected	Detected	0	A_32_P191786	A_32_P191786	NM_133475	NM_133475	NM_133475	Hs.197872	170961	ANKRD24
A_32_P72394	0.0482916	0.00398377	3.68825	up	54.4923	88.5277	13.501	39.5307	67.7203	47.9959	16.5211	12.2631	61.5952	4.89746	67.3359	27.3552	6.12803	6.88951	5.27494	6.71047	5.30225	5.81724	4.81182	3.96063	5.6262	2.50627	4.71008	3.20981	Detected	Detected	Detected	Detected	Detected	Detected	Detected	Detected	Detected	Not Detected	Detected	Detected	0	A_32_P72394	A_32_P72394	NM_002735	NM_002735	NM_002735	Hs.520851	5575	PRKAR1B
A_24_P377775	0.0478132	0.00386897	3.68672	up	140.552	93.0591	8.06828	6.35291	163.392	61.0557	11.256	32.2956	54.5286	2.71179	78.3524	14.3508	7.22625	6.94663	4.56658	4.04437	6.45698	6.12383	4.20769	5.55206	5.44459	1.61537	5.04384	2.20706	Detected	Detected	Not Detected	Not Detected	Detected	Detected	Not Detected	Detected	Detected	Not Detected	Detected	Not Detected	0	A_24_P377775	A_24_P377775	NM_017790	NM_017790	NM_017790	Hs.494875	5998	RGS3
A_32_P67259	0.0495101	0.00424304	3.67691	up	2609.97	2595.35	258.233	331.613	3530.3	4475.84	136.741	286.706	1162.93	128.023	1477.63	194.664	11.0001	11.1113	9.46369	9.58481	10.8151	11.9014	8.14565	9.08857	9.96121	7.84662	10.0626	7.50088	Detected	Detected	Detected	Detected	Detected	Detected	Detected	Detected	Detected	Detected	Detected	Detected	0	A_32_P67259	A_32_P67259	NM_004168	NM_004168	NM_004168	Hs.440475	6389	SDHA
A_33_P3390471	0.0258353	0.000234854	3.6761	up	73.6134	32.1389	6.37675	8.39244	21.3466	19.0014	5.68955	6.0321	14.5807	6.92375	17.8741	22.9355	6.48076	5.81946	4.26424	4.40912	3.61557	4.51849	3.31709	3.04789	3.42861	2.87396	2.28635	2.88469	Detected	Detected	Not Detected	Not Detected	Detected	Detected	Not Detected	Not Detected	Not Detected	Not Detected	Not Detected	Detected	0	A_33_P3390471	A_33_P3390471	lnc-GCNT2-2:2		BC012200	Hs.661431		lnc-GCNT2-2
A_33_P3389573	0.0236517	8.47e-05	3.67411	up	42.8047	31.7535	16.9935	10.9549	46.4548	20.2341	7.62495	4.7198	30.2195	9.11791	31.4288	22.7339	5.84873	5.80857	5.59617	4.78811	4.76784	4.60994	3.66894	2.79506	4.54059	3.17981	3.10068	2.86992	Detected	Detected	Detected	Not Detected	Detected	Detected	Not Detected	Not Detected	Detected	Not Detected	Detected	Detected	0	A_33_P3389573	A_33_P3389573	NM_052814	NM_052814	NM_052814	Hs.694071	64170	CARD9
A_23_P57941	0.032383	0.00100946	3.67185	up	417.795	358.015	43.7464	63.7059	549.649	179.187	37.6188	65.3628	171.194	21.3632	202.324	44.8374	8.52795	8.49053	6.96513	7.38897	8.0999	7.44939	6.15195	6.74559	7.13974	4.43104	6.92495	4.26956	Detected	Detected	Detected	Detected	Detected	Detected	Detected	Detected	Detected	Detected	Detected	Detected	0	A_23_P57941	A_23_P57941	NM_005777	NM_005777	NM_005777	Hs.696735	10180	RBM6
A_23_P147439	0.0471207	0.00369206	3.67144	up	454.241	127.735	42.4586	57.9934	675.191	359.211	29.5565	64.7345	166.434	28.2619	219.85	39.9241	8.63515	7.30177	6.92149	7.25965	8.39555	8.33415	5.75592	6.73142	7.09556	4.93403	7.06649	4.00628	Detected	Detected	Detected	Detected	Detected	Detected	Detected	Detected	Detected	Detected	Detected	Detected	0	A_23_P147439	A_23_P147439	NM_017492	NM_017492	NM_017492	Hs.460499	11273	ATXN2L
A_33_P3347937	0.034266	0.00132851	3.66675	up	766.343	478.32	136.137	149.305	779.539	703.906	48.4574	91.1715	327.421	39.4298	500.574	91.7039	9.29431	8.85046	8.58344	8.53973	8.58573	9.23286	6.55976	7.29809	8.09918	5.56504	8.37642	5.94104	Detected	Detected	Detected	Detected	Detected	Detected	Detected	Detected	Detected	Detected	Detected	Detected	0	A_33_P3347937	A_33_P3347937	NM_005526	NM_005526	NM_005526	Hs.530227	3297	HSF1
A_19_P00808452	0.0450166	0.00327706	3.66361	up	287.264	726.908	20.1057	21.2104	171.032	18.395	32.6227	23.1067	93.9682	9.75786	88.3936	25.8919	8.0747	9.38321	5.83923	5.78436	6.51859	4.46797	5.91337	4.9977	6.24831	3.25889	5.30442	3.10577	Detected	Detected	Detected	Detected	Detected	Detected	Detected	Detected	Detected	Not Detected	Detected	Detected	0	A_19_P00808452	A_19_P00808452	NM_012309	NM_012309	NM_012309	Hs.268726	22941	SHANK2
A_24_P169092	0.0326879	0.0010653	3.66124	up	4845.79	6490.87	656.023	2259.7	4897.39	2706.86	225.836	704.075	2115.65	299.147	1788.66	353.337	11.8984	12.3573	10.6569	12.0562	11.3115	11.1434	8.87312	10.4023	10.8424	9.20625	10.3598	8.5058	Detected	Detected	Detected	Detected	Detected	Detected	Detected	Detected	Detected	Detected	Detected	Detected	0	A_24_P169092	A_24_P169092	ENST00000618849		AJ972402	Hs.745167	84441	MAML2
A_23_P397293	0.0290935	0.000508743	3.6593	up	917.359	137.171	15.0838	11.7548	50.3492	165.046	63.6524	20.2357	26.2594	11.4766	61.5507	42.8404	9.52877	7.38006	5.42798	4.88637	4.88038	7.34532	6.98475	4.77104	4.31952	3.46992	4.50909	4.16516	Detected	Detected	Detected	Not Detected	Detected	Detected	Detected	Detected	Detected	Not Detected	Detected	Detected	0	A_23_P397293	A_23_P397293	NM_017527	NM_017527	NM_017527	Hs.69517	54742	LY6K
A_33_P3272080	0.0440583	0.00308448	3.65808	up	697.522	975.279	135.031	459.835	507.604	463.26	61.1588	88.6339	391.846	49.5007	441.432	102.185	9.18102	9.75737	8.56987	9.98849	7.9853	8.66532	6.92428	7.25133	8.36671	6.01409	8.17501	6.1894	Detected	Detected	Detected	Detected	Detected	Detected	Detected	Detected	Detected	Detected	Detected	Detected	0	A_33_P3272080	A_33_P3272080	ENST00000623824		CV575364	Hs.660704	347148	QRFP
A_33_P3229156	0.0258313	0.000229082	3.65482	up	35.8335	34.2707	15.2653	12.4098	214.432	37.4835	9.43124	11.706	29.382	14.2883	36.3164	32.3211	5.642	5.8823	5.44557	4.96979	6.82618	5.47957	3.96131	3.88806	4.49529	3.77942	3.36716	3.53538	Detected	Detected	Detected	Detected	Detected	Detected	Not Detected	Detected	Detected	Not Detected	Detected	Detected	0	A_33_P3229156	A_33_P3229156	NM_001302643	NM_001302643	NM_001302643	Hs.512686	63910	SLC17A9
A_23_P381017	0.0250229	0.000161367	3.64855	up	46.7694	27.7077	6.36175	6.23851	42.6323	29.9905	9.47957	9.01747	13.2606	7.60175	24.8405	12.1976	5.95219	5.67122	4.26077	4.02172	4.64331	5.17436	3.96934	3.52798	3.29714	2.97908	2.70489	2.0412	Detected	Detected	Not Detected	Not Detected	Detected	Detected	Not Detected	Not Detected	Not Detected	Not Detected	Detected	Not Detected	0	A_23_P381017	A_23_P381017	NM_152559	NM_152559	NM_152559	Hs.647042	155368	WBSCR27
A_24_P99090	0.0314567	0.000845357	3.64384	up	53.7833	22.6014	10.0114	12.6394	76.0996	291.262	7.72	24.2629	17.7658	12.269	39.5121	43.58	6.11203	5.47215	4.86737	4.99445	5.4612	8.05477	3.68615	5.07924	3.7117	3.56083	3.52831	4.20297	Detected	Detected	Not Detected	Detected	Detected	Detected	Not Detected	Detected	Not Detected	Not Detected	Detected	Detected	0	A_24_P99090	A_24_P99090	NM_018204	NM_018204	NM_018204	Hs.444028	26586	CKAP2
A_33_P3347168	0.0426504	0.00277424	3.64239	up	70.303	84.1473	8.89917	22.6814	253.927	243.992	10.0858	33.4947	36.0352	16.9113	105.148	29.3545	6.43069	6.83177	4.70147	5.88545	7.04157	7.83673	4.05364	5.61181	4.81073	4.04155	5.67668	3.34394	Detected	Detected	Not Detected	Not Detected	Detected	Detected	Not Detected	Detected	Detected	Not Detected	Detected	Detected	0	A_33_P3347168	A_33_P3347168	NM_005647	NM_005647	NM_005647	Hs.495656	6907	TBL1X
A_33_P3210900	0.0486295	0.00406597	3.63714	up	1266.15	1797.86	63.3774	155.891	533.195	3992.59	97.908	98.3147	269.724	73.8965	346.692	223.553	9.96672	10.5944	7.50016	8.59758	8.05312	11.7216	7.64814	7.42801	7.81496	6.82049	7.79911	7.74601	Detected	Detected	Detected	Detected	Detected	Detected	Detected	Detected	Detected	Detected	Detected	Detected	0	A_33_P3210900	A_33_P3210900	ENST00000397099				6396	SEC13
A_23_P157793	0.0250229	0.000130516	3.63682	up	42.6849	59.61	11.652	9.93996	70.9967	16.5216	6.15408	9.85859	24.5292	7.84546	33.0976	25.2361	5.84535	6.46166	5.07293	4.64435	5.36793	4.31002	3.40721	3.6412	4.21617	3.01329	3.1926	3.0557	Detected	Detected	Not Detected	Not Detected	Detected	Detected	Not Detected	Not Detected	Detected	Not Detected	Detected	Detected	0	A_23_P157793	A_23_P157793	NM_001216	NM_001216	NM_001216	Hs.63287	768	CA9
A_24_P227211	0.0341987	0.00130881	3.6365	up	58.4358	39.4787	15.1109	12.0041	97.7867	152.898	7.99949	15.8253	39.8909	16.1565	56.5109	25.9315	6.20963	6.02918	5.43105	4.91932	5.79559	7.25062	3.73147	4.36503	4.96719	3.96706	4.3199	3.10942	Detected	Detected	Detected	Detected	Detected	Detected	Not Detected	Detected	Detected	Detected	Detected	Detected	0	A_24_P227211	A_24_P227211	NM_022822	NM_022822	NM_022822	Hs.280792	64837	KLC2
A_33_P3502640	0.0280318	0.000383966	3.63404	up	96.4841	174.768	9.52583	18.4067	115.073	59.8525	13.4929	18.6001	34.2713	13.8159	56.2302	37.2777	6.79359	7.65033	4.79781	5.5695	6.00191	6.10058	4.48686	4.63396	4.73368	3.72972	4.30973	3.85032	Detected	Detected	Not Detected	Detected	Detected	Detected	Detected	Detected	Detected	Not Detected	Detected	Detected	0	A_33_P3502640	A_33_P3502640	NM_020892	NM_020892	NM_020892	Hs.187058	113878	DTX2
A_23_P126008	0.0417503	0.00258576	3.62626	up	371.807	200.128	22.7174	32.358	258.856	315.26	22.4896	39.7186	67.2559	31.8025	163.885	40.5221	8.38588	7.81078	6.01003	6.42736	7.06989	8.15898	5.31084	5.90381	5.75392	5.15609	6.54682	4.04055	Detected	Detected	Detected	Detected	Detected	Detected	Detected	Detected	Detected	Detected	Detected	Detected	0	A_23_P126008	A_23_P126008	NM_015112	NM_015112	NM_015112	Hs.319481	23139	MAST2
A_23_P19987	0.0308096	0.000738589	3.62486	up	3223.4	1066.47	94.0795	194.232	873.361	352.461	98.3636	71.0034	148.339	111.686	324.562	170.178	11.2947	9.87733	8.0453	8.88432	8.74102	8.31072	7.65481	6.88459	6.93028	7.60111	7.69141	7.24365	Detected	Detected	Detected	Detected	Detected	Detected	Detected	Detected	Detected	Detected	Detected	Detected	0	A_23_P19987	A_23_P19987	NM_006547	NM_006547	NM_006547	Hs.700696	10643	IGF2BP3
A_33_P3226060	0.0298349	0.000622033	3.62122	up	1391.67	1069.61	64.9216	445.702	602.352	483.318	85.7473	123.393	201.06	77.9213	260.174	112.642	10.102	9.88238	7.53226	9.95313	8.23053	8.72203	7.44507	7.78954	7.38006	6.92507	7.33979	6.40389	Detected	Detected	Detected	Detected	Detected	Detected	Detected	Detected	Detected	Detected	Detected	Detected	0	A_33_P3226060	A_33_P3226060	NM_001195278	NM_001195278		Hs.283851	100507421	TMEM178B
A_23_P219013	0.0290935	0.000513279	3.61639	up	716.706	368.717	52.4931	81.8656	470.745	553.982	43.68	66.7893	160.16	45.2427	163.041	85.9008	9.21445	8.53275	7.22485	7.74308	7.87988	8.90601	6.39096	6.77978	7.03947	5.8332	6.53769	5.7926	Detected	Detected	Detected	Detected	Detected	Detected	Detected	Detected	Detected	Detected	Detected	Detected	0	A_23_P219013	A_23_P219013	NM_033450	NM_033450	NM_033450	Hs.55879	89845	ABCC10
A_23_P129513	0.0258475	0.000261442	3.61421	up	351.315	250.984	70.7526	96.0018	417.004	280.617	41.7927	63.1729	134.436	34.6761	169.045	57.8373	8.31131	8.07061	7.65393	7.95176	7.71213	8.00706	6.32094	6.68887	6.78221	5.32062	6.60302	4.86904	Detected	Detected	Detected	Detected	Detected	Detected	Detected	Detected	Detected	Detected	Detected	Detected	0	A_23_P129513	A_23_P129513	NM_006428	NM_006428	NM_006428	Hs.513230	10573	MRPL28
A_33_P3356007	0.0303929	0.000689522	3.6117	up	48.4661	34.0963	7.29288	12.0802	164.869	26.6039	6.34048	8.38352	33.7595	3.65379	75.6831	22.5276	5.9935	5.87703	4.43693	4.92839	6.4701	5.00289	3.44427	3.43446	4.71086	2.1813	4.96593	2.85596	Detected	Detected	Not Detected	Detected	Detected	Detected	Not Detected	Not Detected	Detected	Not Detected	Detected	Detected	0	A_33_P3356007	A_33_P3356007	ENST00000475300		AB208946		240	ALOX5
A_33_P3244073	0.0254975	0.000218271	3.61167	up	83.1775	79.7266	22.5685	44.889	75.6617	49.4216	21.1305	12.2825	48.4168	17.9702	53.8606	34.8533	6.62536	6.77086	6.00012	6.90095	5.45257	5.85444	5.2068	3.96251	5.26495	4.14215	4.21353	3.69837	Detected	Detected	Detected	Detected	Detected	Detected	Detected	Detected	Detected	Detected	Detected	Detected	0	A_33_P3244073	A_33_P3244073	NM_001195442	NM_001195442		Hs.679623	100132146	LOC100132146
A_23_P117980	0.0326775	0.00106131	3.6104	up	28.3656	79.2583	12.1575	27.7987	78.3561	46.0959	16.7605	8.85175	35.9412	8.39979	42.1654	34.9698	5.36688	6.76428	5.12984	6.19481	5.50304	5.76406	4.8355	3.50475	4.80639	3.08756	3.6685	3.70727	Detected	Detected	Not Detected	Detected	Detected	Detected	Detected	Not Detected	Detected	Not Detected	Detected	Detected	0	A_23_P117980	A_23_P117980	NM_005886	NM_005886	NM_005886	Hs.275675	10300	KATNB1
A_33_P3209894	0.0353632	0.00153986	3.60844	up	1838.43	1661.85	275.352	871.495	1545.32	1248.22	103.176	290.385	785.207	93.9951	733.95	178.874	10.5022	10.4934	9.54741	10.8031	9.56919	10.0177	7.72687	9.11114	9.38295	7.28356	8.9821	7.33812	Detected	Detected	Detected	Detected	Detected	Detected	Detected	Detected	Detected	Detected	Detected	Detected	0	A_33_P3209894	A_33_P3209894	ENST00000428076
A_33_P3347413	0.0286923	0.000477425	3.60792	up	290.321	232.547	84.2224	82.8435	505.733	120.057	33.4383	74.0576	154.528	21.9574	213.097	42.5956	8.08591	7.97768	7.89194	7.75807	7.97981	6.95035	5.95351	6.94663	6.98822	4.47933	7.01462	4.15443	Detected	Detected	Detected	Detected	Detected	Detected	Detected	Detected	Detected	Detected	Detected	Detected	0	A_33_P3347413	A_33_P3347413	NM_020524	NM_020524	NM_020524	Hs.505806	57326	PBXIP1
A_24_P74559	0.0284338	0.000408494	3.60347	up	317.569	124.001	125.137	29.0897	1598.63	87.6812	17.5318	63.4101	198.128	14.068	443.571	46.7326	8.1916	7.26827	8.4614	6.26344	9.62199	6.56059	4.90777	6.69601	7.35921	3.75597	8.18265	4.36935	Detected	Detected	Detected	Detected	Detected	Detected	Detected	Detected	Detected	Not Detected	Detected	Detected	0	A_24_P74559	A_24_P74559	NM_013385	NM_013385	NM_013385	Hs.170944	27128	CYTH4
A_32_P32856	0.0314567	0.00084985	3.60182	up	25.8245	30.0153	7.7793	20.669	80.3658	45.7404	7.25823	8.3342	28.1513	5.40329	63.153	22.1946	5.25604	5.75117	4.51827	5.74772	5.53756	5.75329	3.60825	3.42645	4.42938	2.61501	4.56262	2.82999	Detected	Detected	Not Detected	Detected	Detected	Detected	Not Detected	Not Detected	Detected	Not Detected	Detected	Detected	0	A_32_P32856	A_32_P32856	NM_032407	NM_032407	NM_032407	Hs.368160	56097	PCDHGC5
A_23_P404730	0.048567	0.00405031	3.59631	up	17.1209	20.1189	2.4394	2.43784	44.9232	42.8311	6.145	2.20675	12.1027	2.7936	21.4507	10.9173	4.76032	5.3616	2.59586	2.67479	4.71831	5.66648	3.40559	1.88497	3.18036	1.77947	2.50417	1.94371	Detected	Detected	Not Detected	Not Detected	Detected	Detected	Not Detected	Not Detected	Not Detected	Not Detected	Not Detected	Not Detected	0	A_23_P404730	A_23_P404730	NM_052948	NM_052948	NM_052948	Hs.515364	115703	ARHGAP33
A_33_P3229953	0.028501	0.000442323	3.59556	up	34.8471	40.0214	12.4597	32.6978	53.7078	21.1855	3.71164	9.72568	35.3408	12.5449	45.668	27.5342	5.61265	6.04239	5.16123	6.44261	4.97417	4.67843	2.77503	3.62303	4.78104	3.59373	3.83897	3.22238	Detected	Detected	Not Detected	Detected	Detected	Detected	Not Detected	Not Detected	Detected	Not Detected	Detected	Detected	0	A_33_P3229953	A_33_P3229953	NM_001958	NM_001958	NM_001958	Hs.433839	1917	EEF1A2
A_33_P3266265	0.0476232	0.00381692	3.58991	up	900.272	981.973	51.469	385.046	540.679	616.399	59.4783	83.3773	193.745	56.2847	488.178	109.219	9.49898	9.76796	7.19703	9.77012	8.07508	9.05109	6.88112	7.14694	7.32421	6.27656	8.33362	6.33411	Detected	Detected	Detected	Detected	Detected	Detected	Detected	Detected	Detected	Detected	Detected	Detected	0	A_33_P3266265	A_33_P3266265	NM_001025780	NM_001025780	NM_001025780	Hs.380389	51104	ABHD17B
A_33_P3232280	0.0404234	0.00238948	3.5885	up	340.532	212.294	29.2001	124.414	355.033	445.34	16.6294	66.1216	87.887	60.9638	188.934	58.051	8.27474	7.87248	6.37671	8.29045	7.49034	8.60945	4.82169	6.76355	6.15492	6.43209	6.80498	4.87665	Detected	Detected	Detected	Detected	Detected	Detected	Not Detected	Detected	Detected	Detected	Detected	Detected	0	A_33_P3232280	A_33_P3232280	NM_018164	NM_018164	NM_018164	Hs.505077	55726	ASUN
A_21_P0013032	0.0262832	0.000277262	3.58814	up	21.719	48.3577	10.5759	32.2919	93.1237	152.95	8.60729	9.77004	29.99	24.1927	37.5256	49.729	5.04913	6.23921	4.94381	6.42418	5.73165	7.25143	3.83343	3.62908	4.52778	4.65031	3.42797	4.51143	Detected	Detected	Not Detected	Detected	Detected	Detected	Not Detected	Not Detected	Detected	Detected	Detected	Detected	0	A_21_P0013032	A_21_P0013032	ENST00000368966				221262	CCDC162P
A_32_P82189	0.0489696	0.00413041	3.58725	up	195.001	133.59	5.91572	27.9093	90.0726	166.93	8.28816	31.3953	40.456	18.8349	64.7251	43.7259	7.61723	7.35006	4.16851	6.20106	5.6862	7.35875	3.78022	5.50509	4.99222	4.21995	4.61663	4.21043	Detected	Detected	Not Detected	Detected	Detected	Detected	Not Detected	Detected	Detected	Detected	Detected	Detected	0	A_32_P82189	A_32_P82189	NM_032180	NM_032180	NM_032180	Hs.440466	84140	FAM161A
A_23_P126167	0.0393007	0.00220889	3.5843	up	64.596	181.336	14.886	15.0517	203.33	32.2373	26.3496	7.82832	46.5402	10.1179	63.1665	34.3353	6.32964	7.6913	5.40768	5.25228	6.75074	5.27494	5.57457	3.34827	5.20181	3.30329	4.56307	3.6654	Detected	Detected	Detected	Detected	Detected	Detected	Detected	Not Detected	Detected	Not Detected	Detected	Detected	0	A_23_P126167	A_23_P126167	NM_002249	NM_002249	NM_002249	Hs.490765	3782	KCNN3
A_33_P3420486	0.0419666	0.00263333	3.58379	up	92.1035	139.403	19.187	41.803	164.986	61.6396	12.6765	36.967	90.8103	11.5877	104.413	21.2104	6.74151	7.39965	5.77297	6.79695	6.47153	6.13469	4.3891	5.78195	6.20337	3.48258	5.66034	2.75103	Detected	Detected	Detected	Detected	Detected	Detected	Not Detected	Detected	Detected	Not Detected	Detected	Detected	0	A_33_P3420486	A_33_P3420486	AK025118		AK025118	Hs.612899
A_23_P150555	0.0309738	0.000783463	3.5833	up	30.1907	42.9796	3.97601	7.30685	31.992	52.9349	4.67101	9.14067	13.1177	5.57677	36.3812	18.6527	5.44042	6.11707	3.60359	4.22153	4.21006	5.9418	3.08489	3.54411	3.28515	2.64929	3.3718	2.55149	Detected	Detected	Not Detected	Not Detected	Detected	Detected	Not Detected	Not Detected	Not Detected	Not Detected	Detected	Detected	0	A_23_P150555	A_23_P150555	NM_006551	NM_006551	NM_006551	Hs.204096	10647	SCGB1D2
A_23_P94754	0.0404892	0.00239794	3.58285	up	207.587	617.88	23.5939	9.01857	67.7377	39.628	11.9915	27.0533	29.0961	15.1836	57.7331	60.8421	7.69169	9.1796	6.06666	4.50727	5.30315	5.55866	4.30515	5.25704	4.48071	3.8666	4.36711	4.98379	Detected	Detected	Detected	Not Detected	Detected	Detected	Not Detected	Detected	Detected	Not Detected	Detected	Detected	0	A_23_P94754	A_23_P94754	NM_005118	NM_005118	NM_005118	Hs.23349	9966	TNFSF15
A_33_P3311210	0.033506	0.00117688	3.58257	up	904.022	929.62	81.868	254.934	219.218	593.85	91.6254	53.3345	184.75	60.6741	184.455	130.861	9.50582	9.6986	7.85666	9.24119	6.85454	8.9973	7.55004	6.39808	7.25373	6.42291	6.76184	6.72152	Detected	Detected	Detected	Detected	Detected	Detected	Detected	Detected	Detected	Detected	Detected	Detected	0	A_33_P3311210	A_33_P3311210	NM_001098169	NM_001098169	NM_001098169	Hs.449687	390259	BSX
A_33_P3252146	0.0357334	0.00161199	3.58164	up	2821.49	1773.85	128.258	427.299	660.398	881.731	119.698	161.837	406.581	85.8315	431.865	158.014	11.1123	10.5769	8.49505	9.90129	8.36671	9.53826	7.95555	8.21583	8.41998	7.11114	8.14553	7.09875	Detected	Detected	Detected	Detected	Detected	Detected	Detected	Detected	Detected	Detected	Detected	Detected	0	A_33_P3252146	A_33_P3252146	NM_001105574	NM_001105574	NM_001105574	Hs.531194	340784	HMX3
A_21_P0011871	0.0339456	0.00126224	3.57886	up	155.922	43.7158	28.8779	11.7792	37.2565	113.589	13.7144	14.8182	67.3628	8.42371	52.2121	27.9888	7.34542	6.13588	6.36157	4.88888	4.43757	6.88103	4.51311	4.25838	5.75663	3.09012	4.14226	3.25285	Detected	Detected	Detected	Not Detected	Detected	Detected	Not Detected	Not Detected	Detected	Not Detected	Detected	Detected	0	A_21_P0011871	A_21_P0011871	NM_001286811	NM_001286811			100996693	LOC100996693
A_33_P3336449	0.0250229	0.000119324	3.57582	up	132.745	74.0394	143.577	62.6093	127.111	69.1978	22.1016	34.6867	60.3651	48.8275	60.1127	44.2644	7.15506	6.69255	8.65502	7.36534	6.12528	6.2717	5.28141	5.67338	5.59458	5.98659	4.45968	4.23969	Detected	Detected	Detected	Detected	Detected	Detected	Detected	Detected	Detected	Detected	Detected	Detected	0	A_33_P3336449	A_33_P3336449	lnc-CIB4-1:1					lnc-CIB4-1
A_24_P301547	0.0391744	0.00217274	3.57486	up	173.529	116.604	15.0171	51.8363	87.6934	263.858	13.1826	33.1807	54.3404	26.7677	82.3429	45.15	7.47472	7.20034	5.42136	7.11057	5.65067	7.93218	4.45171	5.59747	5.44065	4.83449	5.15246	4.28573	Detected	Detected	Detected	Detected	Detected	Detected	Detected	Detected	Detected	Detected	Detected	Detected	0	A_24_P301547	A_24_P301547	NM_017941	NM_017941	NM_017941	Hs.12929	55028	C17orf80
A_33_P3350343	0.0319756	0.000969511	3.5728	up	20.9932	19.5888	3.53215	5.18322	66.6501	14.2174	5.0616	2.40765	17.4534	3.22892	24.9283	14.6838	5.00902	5.33878	3.40017	3.79631	5.28062	4.09849	3.18191	2.03884	3.68562	2.05023	2.7104	2.23404	Detected	Detected	Not Detected	Not Detected	Detected	Detected	Not Detected	Not Detected	Detected	Not Detected	Detected	Not Detected	0	A_33_P3350343	A_33_P3350343	XR_246488	XR_246488	XR_246488	Hs.258855	101929115	LOC101929115
A_33_P3382303	0.0254975	0.000217863	3.57086	up	188.342	41.5846	22.3424	33.4988	173.58	133.133	25.1748	15.7337	56.2292	13.6231	82.9778	49.6989	7.57321	6.08371	5.98638	6.48059	6.54015	7.08035	5.49822	4.35452	5.48933	3.7079	5.16705	4.50973	Detected	Detected	Detected	Detected	Detected	Detected	Detected	Detected	Detected	Not Detected	Detected	Detected	0	A_33_P3382303	A_33_P3382303	NM_005892	NM_005892	NM_005892	Hs.100217	752	FMNL1
A_23_P152344	0.0258353	0.000235604	3.56992	up	46.8623	38.3144	12.8231	14.1805	100.899	36.0274	8.86765	5.86844	35.9636	10.0275	56.0389	28.2067	5.95403	6.00002	5.20411	5.16332	5.83292	5.42516	3.87471	3.01773	4.80772	3.29474	4.30095	3.26836	Detected	Detected	Not Detected	Detected	Detected	Detected	Not Detected	Not Detected	Detected	Not Detected	Detected	Detected	0	A_23_P152344	A_23_P152344	NM_001520	NM_001520	NM_001520	Hs.371718	2975	GTF3C1
A_23_P351342	0.034227	0.00131574	3.56794	up	238.223	146.02	31.1272	56.1883	463.512	202.989	20.4909	42.4181	111.717	25.8879	197.371	42.0794	7.85465	7.44997	6.47185	7.21901	7.85937	7.60419	5.15445	6.01227	6.50027	4.77245	6.88121	4.12783	Detected	Detected	Detected	Detected	Detected	Detected	Detected	Detected	Detected	Detected	Detected	Detected	0	A_23_P351342	A_23_P351342	NM_015164	NM_015164	NM_015164	Hs.646775	23207	PLEKHM2
A_33_P3210463	0.030849	0.000772275	3.56593	up	70.6136	63.1703	7.90902	4.84908	21.9329	36.8115	6.60612	7.52433	18.1073	3.48366	34.5593	29.8888	6.43559	6.52273	4.53984	3.71717	3.65296	5.45451	3.49337	3.29902	3.74267	2.12854	3.27415	3.37937	Detected	Detected	Not Detected	Not Detected	Detected	Detected	Not Detected	Not Detected	Detected	Not Detected	Detected	Detected	0	A_33_P3210463	A_33_P3210463	NM_198994	NM_198994	NM_198994	Hs.452039	343641	TGM6
A_33_P3367017	0.0271345	0.000345351	3.56306	up	130.092	142.465	23.2264	29.6313	220.708	183.147	23.9602	38.4823	57.9458	19.9666	79.046	40.6627	7.13139	7.42229	6.04321	6.29289	6.86387	7.47699	5.41706	5.85049	5.5378	4.31549	5.06385	4.04724	Detected	Detected	Detected	Detected	Detected	Detected	Detected	Detected	Detected	Detected	Detected	Detected	0	A_33_P3367017	A_33_P3367017	NM_001024957	NM_001024957	NM_001024957	Hs.100426	25855	BRMS1
A_23_P131899	0.0313862	0.000824625	3.55848	up	131.018	108.612	50.6811	56.8627	515.515	545.873	20.2224	26.3402	75.5154	37.1758	335.515	64.2445	7.1409	7.11675	7.17636	7.23417	8.00733	8.8877	5.13114	5.21389	5.92704	5.44991	7.74395	5.10973	Detected	Detected	Detected	Detected	Detected	Detected	Detected	Detected	Detected	Detected	Detected	Detected	0	A_23_P131899	A_23_P131899	NM_080489	NM_080489	NM_080489	Hs.657015	27111	SDCBP2
A_33_P3370763	0.0461689	0.00349504	3.55772	up	671.964	234.829	12.6218	30.2385	312.872	74.4094	28.6225	42.4281	89.2936	22.8827	104.028	27.7039	9.13402	7.98985	5.17927	6.32458	7.32852	6.36429	5.70732	6.01278	6.17636	4.55259	5.652	3.23374	Detected	Detected	Not Detected	Detected	Detected	Detected	Detected	Detected	Detected	Detected	Detected	Detected	0	A_33_P3370763	A_33_P3370763	NM_015077	NM_015077	NM_015077	Hs.743510	23098	SARM1
A_33_P3253144	0.025917	0.000267101	3.55368	up	124.176	70.4974	20.0286	25.2867	234.712	37.208	15.6073	29.9267	53.3021	10.908	58.2859	34.7909	7.0771	6.63827	5.83447	6.05097	6.9431	5.47038	4.7182	5.42688	5.40854	3.40139	4.38798	3.6954	Detected	Detected	Detected	Detected	Detected	Detected	Detected	Detected	Detected	Not Detected	Detected	Detected	0	A_33_P3253144	A_33_P3253144	NM_024872	NM_024872	NM_024872	Hs.720849	79930	DOK3
A_33_P3733417	0.0250229	0.000127395	3.54987	up	23.3161	18.1115	5.43441	13.9521	39.2085	67.7415	8.86398	3.76043	11.9274	7.02742	29.4297	38.6506	5.13589	5.26586	4.0559	5.13879	4.51546	6.24669	3.87381	2.55428	3.16143	2.89332	2.97919	3.92997	Detected	Not Detected	Not Detected	Detected	Detected	Detected	Not Detected	Not Detected	Not Detected	Not Detected	Detected	Detected	0	A_33_P3733417	A_33_P3733417	NM_000795	NM_000795	NM_000795	Hs.73893	1813	DRD2
A_23_P217208	0.0258313	0.000230139	3.54851	up	114.892	39.5582	33.5854	16.958	51.3899	31.5721	14.9753	12.8026	73.2297	7.50005	50.4161	20.099	6.98638	6.03117	6.58389	5.4445	4.91247	5.24564	4.64791	4.0206	5.88151	2.96309	4.06499	2.66268	Detected	Detected	Detected	Detected	Detected	Detected	Detected	Detected	Detected	Not Detected	Detected	Not Detected	0	A_23_P217208	A_23_P217208	NM_005660	NM_005660	NM_005660	Hs.21899	7355	SLC35A2
A_33_P3399634	0.02321	6.85e-05	3.54689	up	41.7073	48.9895	55.8126	32.7181	58.4312	35.4837	15.2439	17.9132	28.9337	24.2407	35.9297	34.0486	5.818	6.25374	7.31338	6.4438	5.09716	5.40338	4.67916	4.56914	4.47236	4.65378	3.34808	3.64761	Detected	Detected	Detected	Detected	Detected	Detected	Detected	Detected	Detected	Detected	Detected	Detected	0	A_33_P3399634	A_33_P3399634	NM_001080521	NM_001080521	NM_001080521	Hs.134650	644943	RASSF10
A_33_P3755781	0.0250229	0.000166537	3.54445	up	105.478	106.77	46.5405	40.1399	55.2522	35.1314	11.2348	29.2942	33.4175	21.4596	56.0948	43.5418	6.89176	7.09838	7.05696	6.73511	5.01554	5.3901	4.20526	5.38875	4.69627	4.4395	4.30351	4.20118	Detected	Detected	Detected	Detected	Detected	Detected	Not Detected	Detected	Detected	Detected	Detected	Detected	0	A_33_P3755781	A_33_P3755781	NM_001281295	NM_001281295	NM_001281295	Hs.348645	130951	M1AP
A_24_P29723	0.0350993	0.0014877	3.5402	up	46.7484	69.0683	10.0512	5.30984	207.754	47.4007	4.96023	12.6978	36.0791	10.0485	80.4243	18.3584	5.95182	6.61599	4.87298	3.82593	6.78211	5.80029	3.15886	4.01058	4.81284	3.29633	5.10196	2.52556	Detected	Detected	Not Detected	Not Detected	Detected	Detected	Not Detected	Detected	Detected	Not Detected	Detected	Not Detected	0	A_24_P29723	A_24_P29723	NM_000941	NM_000941	NM_000941	Hs.354056	5447	POR
A_33_P3729436	0.0385117	0.00206442	3.5368	up	933.042	1159.02	100.63	592.923	657.161	677.166	54.0108	86.8824	361.45	96.1764	430.496	145.584	9.54905	9.99963	8.1468	10.3113	8.35892	9.17385	6.73178	7.21459	8.24913	7.33093	8.14101	6.93746	Detected	Detected	Detected	Detected	Detected	Detected	Detected	Detected	Detected	Detected	Detected	Detected	0	A_33_P3729436	A_33_P3729436	BF570972		BF570972	Hs.446545	100170224	SNAR-B1
A_33_P3229702	0.0378425	0.00195708	3.53085	up	29.7228	26.333	2.74959	4.71053	22.5364	31.6112	3.2388	5.55741	16.3468	2.71671	22.3312	16.3549	5.42319	5.62062	2.9478	3.67856	3.6909	5.24717	2.57937	2.9663	3.59159	1.62485	2.55511	2.37094	Detected	Detected	Not Detected	Not Detected	Detected	Detected	Not Detected	Not Detected	Not Detected	Not Detected	Detected	Detected	0	A_33_P3229702	A_33_P3229702	NM_053284	NM_053284	NM_053284	Hs.345818	117166	WFIKKN1
A_33_P3309626	0.0351934	0.00150531	3.53053	up	200.092	674.164	27.5981	47.2848	180.288	420.6	27.5555	35.4394	79.8604	31.9068	133.808	83.3868	7.64646	9.29624	6.29405	6.9747	6.59278	8.53563	5.64658	5.70925	6.01409	5.16152	6.16504	5.72407	Detected	Detected	Detected	Detected	Detected	Detected	Detected	Detected	Detected	Detected	Detected	Detected	0	A_33_P3309626	A_33_P3309626	ENST00000378898		AK131344	Hs.513200	170691	ADAMTS17
A_24_P85881	0.0314567	0.000846188	3.52864	up	143.503	250.398	105.085	127.755	100.683	139.264	27.2403	58.2015	126.264	21.9999	96.0711	63.2831	7.25143	8.06749	8.21104	8.32843	5.83049	7.13581	5.62894	6.55315	6.68735	4.4822	5.48357	5.07481	Detected	Detected	Detected	Detected	Detected	Detected	Detected	Detected	Detected	Detected	Detected	Detected	0	A_24_P85881	A_24_P85881	NM_153835	NM_153835	NM_153835	Hs.631878	165082	GPR113
A_33_P3227696	0.0437075	0.00298394	3.5209	up	39.8407	32.8217	5.95653	4.7719	61.2296	35.9834	3.08193	3.72858	22.7088	12.6447	43.3887	20.4634	5.76295	5.84032	4.17708	3.69509	5.16629	5.42304	2.51002	2.54308	4.097	3.60387	3.72584	2.68929	Detected	Detected	Not Detected	Not Detected	Detected	Detected	Not Detected	Not Detected	Detected	Not Detected	Detected	Detected	0	A_33_P3227696	A_33_P3227696	ENST00000564704		AK091748	Hs.439650	6553	SLC9A5
A_33_P3289596	0.0433094	0.00291052	3.51994	up	29.1459	15.0631	6.58528	24.1647	29.76	21.4798	2.39835	5.4405	36.1426	6.85191	36.5611	20.922	5.40004	5.09456	4.30552	5.97972	4.09774	4.69923	1.95228	2.94349	4.8156	2.86393	3.38023	2.72797	Detected	Not Detected	Not Detected	Detected	Detected	Detected	Not Detected	Not Detected	Detected	Not Detected	Detected	Detected	0	A_33_P3289596	A_33_P3289596	NM_014971	NM_014971	NM_014971	Hs.4892	22979	EFR3B
A_33_P3297888	0.0290935	0.00050364	3.51427	up	1402.23	2203.52	80.5599	194.997	1491.17	1084.41	145.8	182.752	299.632	76.1561	295.182	161.675	10.1121	10.8865	7.83284	8.89105	9.50842	9.8305	8.24384	8.40077	7.97232	6.88103	7.53968	7.14439	Detected	Detected	Detected	Detected	Detected	Detected	Detected	Detected	Detected	Detected	Detected	Detected	0	A_33_P3297888	A_33_P3297888	NM_176816	NM_176816	NM_176816	Hs.654850	202243	CCDC125
A_33_P3229246	0.0223734	4.88e-05	3.5127	up	1775.28	1284.23	304.48	821.847	1002.76	1504.65	190.589	281.584	336.768	184.317	204.06	271.86	10.4425	10.1353	9.68275	10.7328	8.93615	10.2714	8.63854	9.06062	8.14495	8.46886	6.93809	8.07437	Detected	Detected	Detected	Detected	Detected	Detected	Detected	Detected	Detected	Detected	Detected	Detected	0	A_33_P3229246	A_33_P3229246	NM_003528	NM_003528	NM_003528	Hs.2178	8349	HIST2H2BE
A_23_P77833	0.0270363	0.000340308	3.50838	up	930.9	351.585	59.7807	72.1038	779.109	415.652	59.5144	56.4798	160.915	39.7544	276.363	85.3191	9.54646	8.46752	7.41442	7.55892	8.58508	8.51732	6.88186	6.50171	7.04689	5.58012	7.4374	5.77692	Detected	Detected	Detected	Detected	Detected	Detected	Detected	Detected	Detected	Detected	Detected	Detected	0	A_23_P77833	A_23_P77833	NM_024419	NM_024419	NM_024419	Hs.654671	9489	PGS1
A_33_P3293511	0.0349735	0.0014491	3.50756	up	37.3026	40.8645	7.11559	6.09431	25.3635	20.5241	3.63058	4.3571	20.3351	8.67224	33.3937	12.6633	5.68846	6.06521	4.40564	3.99476	3.86488	4.63143	2.74654	2.71326	3.91815	3.12329	3.20999	2.07634	Detected	Detected	Not Detected	Not Detected	Detected	Detected	Not Detected	Not Detected	Detected	Not Detected	Detected	Not Detected	0	A_33_P3293511	A_33_P3293511	NM_001039374	NM_001039374	NM_001039374	Hs.728796	84960	CCDC183
A_33_P3293114	0.0428713	0.00280643	3.50359	up	11467.8	15724.3	1994.21	6529.93	14899.2	10560.9	983.462	1881.86	6179.78	700.274	7373.66	728.297	13.1131	13.6544	12.0811	13.3379	13.0213	13.2465	10.9074	11.7229	12.3427	10.4425	12.573	9.61265	Detected	Detected	Detected	Detected	Detected	Detected	Detected	Detected	Detected	Detected	Detected	Detected	0	A_33_P3293114	A_33_P3293114	NM_001190987	NM_001190987	NM_001190987	Hs.479693	9295	SRSF11
A_33_P3265016	0.0437295	0.00298872	3.5022	up	130.151	61.9652	276.696	38.8158	109.948	132.326	25.4827	55.8684	60.3426	53.4021	55.0105	40.1421	7.13275	6.50116	9.55512	6.68604	5.94414	7.07185	5.5184	6.48206	5.59404	6.16772	4.26139	4.0179	Detected	Detected	Detected	Detected	Detected	Detected	Detected	Detected	Detected	Detected	Detected	Detected	0	A_33_P3265016	A_33_P3265016	NM_000287	NM_000287	NM_000287	Hs.656425	5190	PEX6
A_33_P3256920	0.0476232	0.00381538	3.50139	up	115.576	99.8472	5.36685	11.5703	53.3069	79.4723	18.9024	11.4185	38.9713	7.28564	44.1397	24.2396	6.99324	7.02452	4.03882	4.86298	4.96433	6.44652	5.02557	3.85165	4.93065	2.93194	3.76316	2.97988	Detected	Detected	Not Detected	Detected	Detected	Detected	Detected	Not Detected	Detected	Not Detected	Detected	Detected	0	A_33_P3256920	A_33_P3256920	NM_058238	NM_058238	NM_058238	Hs.512714	7477	WNT7B
A_33_P3230548	0.0382659	0.00203089	3.49807	up	40.7017	6.61283	20.4115	20.5796	87.9865	200.419	17.6575	16.1707	12.3239	22.622	33.5979	37.7155	5.78981	4.35882	5.85952	5.74127	5.65591	7.58752	4.91894	4.40033	3.20443	4.53251	3.22249	3.87479	Detected	Not Detected	Detected	Detected	Detected	Detected	Detected	Detected	Not Detected	Detected	Detected	Detected	0	A_33_P3230548	A_33_P3230548	NM_014875	NM_014875	NM_014875	Hs.3104	9928	KIF14
A_23_P170978	0.0341482	0.0012973	3.49194	up	101.634	42.2356	6.90778	6.72286	70.8611	50.1675	11.8301	13.5483	39.7698	4.2803	32.1526	24.3955	6.84974	6.09987	4.36687	4.11338	5.36508	5.87402	4.28486	4.10974	4.96138	2.35482	3.14221	2.99176	Detected	Detected	Not Detected	Not Detected	Detected	Detected	Not Detected	Detected	Detected	Not Detected	Detected	Detected	0	A_23_P170978	A_23_P170978	NM_017865	NM_017865	NM_017865	Hs.377705	55657	ZNF692
A_33_P3329686	0.0414312	0.00252636	3.48254	up	239.996	179.527	29.4545	45.3933	188.067	628.862	37.5073	42.5279	85.6807	20.2804	136.275	59.9822	7.86383	7.67998	6.38709	6.91638	6.64932	9.07982	6.14651	6.01709	6.11578	4.34428	6.20057	4.95136	Detected	Detected	Detected	Detected	Detected	Detected	Detected	Detected	Detected	Detected	Detected	Detected	0	A_33_P3329686	A_33_P3329686	NM_001009939	NM_001009939	NM_001009939	Hs.728762	5413	Sept5
A_23_P353014	0.0265471	0.000293272	3.4816	up	34.6775	23.3872	10.1516	13.9433	75.8028	32.6671	7.84892	6.52316	36.2143	6.99793	33.7202	28.8211	5.6073	5.50362	4.88643	5.13795	5.45564	5.29379	3.70607	3.13451	4.81873	2.88819	3.22903	3.3097	Detected	Detected	Not Detected	Detected	Detected	Detected	Not Detected	Not Detected	Detected	Not Detected	Detected	Detected	0	A_23_P353014	A_23_P353014	NM_172364	NM_172364	NM_172364	Hs.13768	93589	CACNA2D4
A_24_P233488	0.0267948	0.000325607	3.4791	up	66.8114	74.239	23.5771	31.356	233.265	56.2159	19.4489	11.0411	59.4462	16.3948	99.0789	34.6364	6.36923	6.69584	6.06601	6.38151	6.93525	6.01994	5.07102	3.80282	5.57163	3.9919	5.55294	3.68518	Detected	Detected	Detected	Detected	Detected	Detected	Detected	Not Detected	Detected	Not Detected	Detected	Detected	0	A_24_P233488	A_24_P233488	NM_002309	NM_002309	NM_002309	Hs.2250	3976	LIF
A_33_P3394809	0.0418754	0.00260955	3.47633	up	115.443	106.556	13.6211	19.6776	102.62	220.839	29.8389	23.9254	69.4101	12.5239	44.8968	36.5672	6.99164	7.09627	5.28588	5.67231	5.85602	7.71307	5.77222	5.05492	5.7987	3.59128	3.80146	3.81124	Detected	Detected	Detected	Detected	Detected	Detected	Detected	Detected	Detected	Not Detected	Detected	Detected	0	A_33_P3394809	A_33_P3394809	NM_001282203	NM_001282203	NM_001282203	Hs.569843	5833	PCYT2
A_23_P137423	0.033508	0.00118413	3.47397	up	65.8118	20.8797	12.5522	8.55688	195.488	60.398	7.96459	22.1294	34.5655	6.85434	60.7165	19.9736	6.3522	5.39848	5.17208	4.43669	6.70067	6.11129	3.72505	4.92334	4.74544	2.86427	4.48151	2.65228	Detected	Detected	Detected	Not Detected	Detected	Detected	Not Detected	Detected	Detected	Not Detected	Detected	Detected	0	A_23_P137423	A_23_P137423	NM_052868	NM_052868	NM_052868	Hs.332012	93185	IGSF8
A_33_P3401262	0.0304134	0.000694962	3.47246	up	26.2082	9.54237	2.92399	18.1897	30.1248	13.3886	5.37686	4.60061	11.443	3.99616	14.9713	17.1129	5.27289	4.68196	3.0664	5.55243	4.11974	4.01052	3.25061	2.76773	3.11017	2.2808	2.09021	2.42866	Detected	Not Detected	Not Detected	Detected	Detected	Detected	Not Detected	Not Detected	Not Detected	Not Detected	Not Detected	Detected	0	A_33_P3401262	A_33_P3401262	NM_001097611	NM_001097611	NM_001097611	Hs.350764	148930	KNCN
A_19_P00315922	0.0472753	0.00372608	3.47108	up	279.541	178.944	30.7607	55.3993	335.159	416.999	29.9855	55.4391	94.9339	23.891	226.513	45.0253	8.03888	7.67605	6.45229	7.20055	7.4149	8.52121	5.7802	6.46645	6.26421	4.62923	7.11226	4.27922	Detected	Detected	Detected	Detected	Detected	Detected	Detected	Detected	Detected	Detected	Detected	Detected	0	A_19_P00315922	A_19_P00315922	NM_020945	NM_020945	NM_020945	Hs.287379	57705	WDFY4
A_33_P3369258	0.0310303	0.000790543	3.4699	up	1904.51	1420.1	141.268	949.279	1378.29	1053.03	113.02	152.34	410.128	139.885	624.24	207.698	10.5504	10.2643	8.63388	10.9118	9.3981	9.79068	7.87026	8.11838	8.43434	8.01383	8.72437	7.61869	Detected	Detected	Detected	Detected	Detected	Detected	Detected	Detected	Detected	Detected	Detected	Detected	0	A_33_P3369258	A_33_P3369258	NM_001171888	NM_001171888	NM_001171888	Hs.591162	26127	FGFR1OP2
A_23_P69179	0.0296854	0.000615875	3.46961	up	322.918	222.486	96.2258	154.452	264.811	281.392	39.4255	68.2685	143.512	38.0181	168.343	64.7807	8.20995	7.92593	8.07976	8.58546	7.09763	8.01081	6.22593	6.81915	6.87939	5.49314	6.59475	5.12856	Detected	Detected	Detected	Detected	Detected	Detected	Detected	Detected	Detected	Detected	Detected	Detected	0	A_23_P69179	A_23_P69179	NM_018192	NM_018192	NM_018192	Hs.374191	55214	P3H2
A_24_P130865	0.0431182	0.00286535	3.46918	up	434.873	676.242	28.874	53.738	721.482	422.612	40.7498	88.2938	163.711	27.6361	250.943	58.1184	8.58344	9.30071	6.36144	7.15554	8.4803	8.54117	6.27999	7.24387	7.0726	4.8925	7.28705	4.87903	Detected	Detected	Detected	Detected	Detected	Detected	Detected	Detected	Detected	Detected	Detected	Detected	0	A_24_P130865	A_24_P130865	NM_015107	NM_015107	NM_015107	Hs.133352	23133	PHF8
A_33_P3369885	0.0294201	0.000584846	3.46386	up	130.309	109.736	19.4909	42.2036	168.893	60.7924	9.98502	21.0377	66.0101	24.9936	83.3482	44.2917	7.13373	7.12931	5.79378	6.81086	6.50171	6.11802	4.03914	4.83899	5.72673	4.71056	5.17592	4.24179	Detected	Detected	Detected	Detected	Detected	Detected	Not Detected	Detected	Detected	Detected	Detected	Detected	0	A_33_P3369885	A_33_P3369885	NM_001099280	NM_001099280	NM_001099280	Hs.443139	727957	MROH1
A_24_P256512	0.0258475	0.000251595	3.46378	up	20.4348	42.1014	9.63522	18.2936	29.8935	19.6017	4.41989	4.93004	13.0518	13.4018	33.7829	28.9239	4.97881	6.09642	4.81441	5.56062	4.10652	4.56571	3.0198	2.83965	3.27807	3.68209	3.23304	3.31577	Detected	Detected	Not Detected	Detected	Detected	Detected	Not Detected	Not Detected	Not Detected	Not Detected	Detected	Detected	0	A_24_P256512	A_24_P256512	NM_001007532	NM_001007532	NM_001007532	Hs.661831	246744	STH
A_33_P3301541	0.0419081	0.00262091	3.4636	up	117.504	160.395	10.9793	109.142	291.212	160.808	28.1819	19.2748	49.5989	26.144	158.942	49.8699	7.01454	7.55344	4.99618	8.12246	7.22574	7.31202	5.68192	4.68994	5.29904	4.7911	6.49055	4.5182	Detected	Detected	Not Detected	Detected	Detected	Detected	Detected	Detected	Detected	Detected	Detected	Detected	0	A_33_P3301541	A_33_P3301541	ENST00000378725				29101	SSU72
A_33_P3687389	0.0250229	0.000114113	3.46324	up	124.029	34.6923	13.767	17.3916	31.3168	16.0826	12.7006	9.61786	14.9763	13.9543	33.2901	25.0084	7.07563	5.89591	5.30218	5.48311	4.1758	4.27067	4.39225	3.60918	3.46392	3.74326	3.20506	3.03691	Detected	Detected	Not Detected	Detected	Detected	Detected	Not Detected	Not Detected	Not Detected	Not Detected	Detected	Detected	0	A_33_P3687389	A_33_P3687389	CA309819		CA309819	Hs.659206
A_24_P149902	0.0335302	0.00120328	3.45964	up	43.5966	28.798	7.69537	5.64931	57.9405	23.3914	2.60698	14.9083	27.9386	6.28181	31.1217	16.0041	5.86982	5.70785	4.50474	3.90201	5.08601	4.82045	2.2636	4.26868	4.41644	2.77564	3.08118	2.3416	Detected	Detected	Not Detected	Not Detected	Detected	Detected	Not Detected	Detected	Detected	Not Detected	Detected	Not Detected	0	A_24_P149902	A_24_P149902	NM_016169	NM_016169	NM_016169	Hs.404089	51684	SUFU
A_23_P68922	0.0250229	0.000142034	3.45937	up	28.5761	25.8164	5.27678	6.85215	46.6659	27.7779	6.822	9.26598	14.949	4.67596	26.3294	17.0559	5.37609	5.59913	4.01649	4.14011	4.77343	5.0655	3.52905	3.56197	3.46195	2.45554	2.79429	2.42489	Detected	Detected	Not Detected	Not Detected	Detected	Detected	Not Detected	Not Detected	Not Detected	Not Detected	Detected	Not Detected	0	A_23_P68922	A_23_P68922	NM_033386	NM_033386	NM_033386	Hs.517610	85377	MICALL1
A_21_P0002815	0.034266	0.0013323	3.45717	up	453.802	293.151	27.2855	186.627	340.117	229.723	38.2573	33.9397	85.11	39.5885	204.347	95.245	8.63365	8.24982	6.2776	8.8375	7.43531	7.76243	6.178	5.63649	6.10671	5.57213	6.94084	6.02458	Detected	Detected	Detected	Detected	Detected	Detected	Detected	Detected	Detected	Detected	Detected	Detected	0	A_21_P0002815	A_21_P0002815	lnc-EPHB3-1:1			Hs.581645		lnc-EPHB3-1
A_23_P59294	0.0356987	0.00160704	3.45145	up	5198.74	9375.48	487.392	2053.24	5050.5	8001.57	370.083	804.354	1709.17	533.096	1911.4	611.342	12.0008	12.885	10.2997	11.9211	11.3775	12.8074	9.57929	10.5909	10.515	10.054	10.4717	9.35726	Detected	Detected	Detected	Detected	Detected	Detected	Detected	Detected	Detected	Detected	Detected	Detected	0	A_23_P59294	A_23_P59294	NM_001003699	NM_001003699	NM_001003699	Hs.298248	6239	RREB1
A_33_P3209214	0.032572	0.00105253	3.45048	up	60.882	67.0604	5.64054	26.3288	77.5127	62.9523	13.1224	10.8722	30.2471	13.9203	44.766	34.664	6.26092	6.58592	4.10454	6.11514	5.48683	6.15931	4.44408	3.78254	4.54225	3.74014	3.79559	3.68728	Detected	Detected	Not Detected	Detected	Detected	Detected	Detected	Not Detected	Detected	Not Detected	Detected	Detected	0	A_33_P3209214	A_33_P3209214	NM_001080495	NM_001080495	NM_001080495	Hs.520638	84629	TNRC18
A_33_P3375077	0.0333318	0.00112857	3.44853	up	698.113	511.335	35.2089	124.723	258.153	218.181	60.0643	45.3718	112.851	42.1465	173.102	67.6576	9.18203	8.93925	6.65206	8.29338	7.06523	7.69786	6.89653	6.12641	6.5188	5.69605	6.64284	5.2333	Detected	Detected	Detected	Detected	Detected	Detected	Detected	Detected	Detected	Detected	Detected	Detected	0	A_33_P3375077	A_33_P3375077	NM_015695	NM_015695	NM_015695	Hs.520096	27154	BRPF3
A_33_P3345354	0.0250229	0.000159876	3.44799	up	915.663	482.966	419.453	570.337	419.703	146.413	105.146	100.53	353.042	95.6802	111.413	112.883	9.52552	8.86445	10.0921	10.2705	7.72191	7.20034	7.75775	7.46286	8.21569	7.32049	5.79568	6.40788	Detected	Detected	Detected	Detected	Detected	Detected	Detected	Detected	Detected	Detected	Detected	Detected	0	A_33_P3345354	A_33_P3345354	NM_015997	NM_015997	NM_015997	Hs.512597	51093	RRNAD1
A_23_P39755	0.0258353	0.000240828	3.44727	up	120.517	53.633	28.7646	6.20888	209.281	10.792	13.7252	17.3258	30.3266	8.41554	48.9901	23.1218	7.04394	6.34721	6.35513	4.01572	6.79284	3.71953	4.51491	4.51412	4.54592	3.08928	3.99906	2.89836	Detected	Detected	Detected	Not Detected	Detected	Not Detected	Not Detected	Detected	Detected	Not Detected	Detected	Detected	0	A_23_P39755	A_23_P39755	NM_145236	NM_145236	NM_145236	Hs.299329	93010	B3GNT7
A_19_P00317318	0.04226	0.00269101	3.44698	up	131.872	190.698	25.996	52.6736	120.879	161.884	30.6602	20.4275	73.1623	13.5653	125.385	53.3096	7.14767	7.74714	6.20506	7.13204	6.06316	7.32073	5.81656	4.78781	5.88015	3.70047	6.03474	4.68406	Detected	Detected	Detected	Detected	Detected	Detected	Detected	Detected	Detected	Not Detected	Detected	Detected	0	A_19_P00317318	A_19_P00317318	NM_001145664	NM_001145664	NM_001145664	Hs.662488	731220	RFX8
A_33_P3211263	0.0285992	0.000466902	3.44295	up	1255.97	830.21	360.485	506.168	923.298	1853.45	117.428	116.09	395.464	137.74	610.617	197.106	9.95346	9.55268	9.89122	10.1116	8.81765	10.5752	7.92805	7.69786	8.3798	7.98392	8.68828	7.522	Detected	Detected	Detected	Detected	Detected	Detected	Detected	Detected	Detected	Detected	Detected	Detected	0	A_33_P3211263	A_33_P3211263	NM_182679	NM_182679	NM_182679	Hs.193832	54865	GPATCH4
A_23_P22119	0.0338735	0.00123975	3.44273	up	75.0164	44.274	11.8112	31.8883	138.929	147.214	16.9198	14.401	47.9321	11.7084	77.5832	40.8061	6.49874	6.14858	5.08983	6.40614	6.23499	7.20673	4.85228	4.21188	5.24817	3.49477	5.02153	4.05506	Detected	Detected	Not Detected	Detected	Detected	Detected	Detected	Detected	Detected	Not Detected	Detected	Detected	0	A_23_P22119	A_23_P22119	NM_201380	NM_201380	NM_201380	Hs.434248	5339	PLEC
A_24_P321752	0.0420675	0.00265581	3.44028	up	1394.3	1082.26	40.9112	85.7572	605.377	678.572	71.6113	75.4967	183.973	72.5304	231.034	96.792	10.1045	9.90001	6.86452	7.80252	8.24111	9.17694	7.17101	6.9798	7.24663	6.78442	7.14857	6.06401	Detected	Detected	Detected	Detected	Detected	Detected	Detected	Detected	Detected	Detected	Detected	Detected	0	A_24_P321752	A_24_P321752	NM_015072	NM_015072	NM_015072	Hs.709609	23093	TTLL5
A_24_P298495	0.0482916	0.00398333	3.43792	up	54.9867	60.0668	8.34217	16.6636	130.883	64.3822	3.87769	22.4173	54.0843	13.4895	66.1964	20.8267	6.1383	6.46911	4.61346	5.41844	6.16363	6.1866	2.84212	4.94428	5.43297	3.69114	4.66833	2.72148	Detected	Detected	Not Detected	Detected	Detected	Detected	Not Detected	Detected	Detected	Not Detected	Detected	Not Detected	0	A_24_P298495	A_24_P298495	NR_046285	NR_046285	NR_046285	Hs.660550	100130744	LOC100130744
A_24_P143301	0.0364072	0.00172772	3.43388	up	627.535	898.583	57.6477	304.98	564.561	854.519	52.5596	127.06	234.554	78.6898	250.84	100.133	9.04398	9.65731	7.36341	9.48172	8.13728	9.50649	6.69283	7.83948	7.60778	6.94219	7.28634	6.14254	Detected	Detected	Detected	Detected	Detected	Detected	Detected	Detected	Detected	Detected	Detected	Detected	0	A_24_P143301	A_24_P143301	NM_181337	NM_181337	NM_181337	Hs.697888	353219	KAAG1
A_33_P3368039	0.034227	0.00131714	3.43291	up	54.883	62.7537	16.2597	21.4633	158.738	92.0847	8.95289	31.917	43.101	17.2098	79.6744	20.5223	6.13602	6.51451	5.53687	5.80236	6.41627	6.62064	3.88506	5.53301	5.0843	4.07098	5.08154	2.69518	Detected	Detected	Detected	Detected	Detected	Detected	Not Detected	Detected	Detected	Not Detected	Detected	Detected	0	A_33_P3368039	A_33_P3368039	NM_001286520	NM_001286520	NM_001286520	Hs.182885	347734	SLC35B2
A_23_P143303	0.0299502	0.000646724	3.43232	up	159.536	172.314	34.3765	43.3134	339.156	217.347	19.8206	36.6472	96.4945	32.2593	141.932	45.4635	7.36996	7.63497	6.61676	6.84911	7.43116	7.69104	5.1004	5.76628	6.28744	5.18163	6.28036	4.30178	Detected	Detected	Detected	Detected	Detected	Detected	Detected	Detected	Detected	Detected	Detected	Detected	0	A_23_P143303	A_23_P143303	NM_022575	NM_022575	NM_022575	Hs.269577	64601	VPS16
A_23_P49060	0.0223734	5.21e-05	3.42913	up	50.4214	42.6712	26.743	18.5736	86.8694	63.5695	9.4316	14.4877	33.6048	20.4157	50.9647	36.1922	6.03574	6.1108	6.24727	5.58361	5.6384	6.17044	3.96139	4.21995	4.70447	4.35375	4.09015	3.7895	Detected	Detected	Detected	Detected	Detected	Detected	Not Detected	Not Detected	Detected	Detected	Detected	Detected	0	A_23_P49060	A_23_P49060	NM_181642	NM_181642	NM_181642	Hs.233950	6692	SPINT1
A_33_P3314521	0.0353632	0.00153282	3.42698	up	58.2431	71.2261	6.97944	17.1162	56.7417	11.5768	10.8713	5.82528	10.9847	8.57042	40.7783	39.2925	6.2056	6.64968	4.37968	5.45892	5.05598	3.81544	4.15674	3.01107	3.06208	3.10869	3.59648	3.96862	Detected	Detected	Not Detected	Detected	Detected	Not Detected	Not Detected	Not Detected	Not Detected	Not Detected	Detected	Detected	0	A_33_P3314521	A_33_P3314521	ENST00000540952	XM_006724294	XM_006724294		646851	FAM227A
A_23_P381461	0.0250229	0.000119032	3.42545	up	42.3731	21.165	10.3265	15.0453	44.8989	22.1632	11.6432	8.70137	17.3516	4.50891	25.4065	33.9877	5.83717	5.41103	4.91018	5.25147	4.71744	4.74544	4.25876	3.48341	3.67557	2.41353	2.7399	3.64381	Detected	Detected	Not Detected	Detected	Detected	Detected	Not Detected	Not Detected	Not Detected	Not Detected	Detected	Detected	0	A_23_P381461	A_23_P381461	ENST00000306688		JF432130	Hs.143774	201255	LRRC45
A_23_P152082	0.0250229	0.000136505	3.42138	up	62.8382	26.1781	17.2651	14.0393	63.4378	36.9291	7.86098	12.6818	37.2308	14.0662	32.664	27.2916	6.2986	5.61581	5.61888	5.14823	5.21312	5.4601	3.70756	4.00851	4.86057	3.75575	3.16963	3.20525	Detected	Detected	Detected	Detected	Detected	Detected	Not Detected	Not Detected	Detected	Not Detected	Detected	Detected	0	A_23_P152082	A_23_P152082	NM_016642	NM_016642	NM_016642	Hs.709819	51332	SPTBN5
A_33_P3413905	0.0313211	0.000810003	3.42014	up	93.6304	105.433	18.1394	19.5325	140.895	64.2031	27.5206	12.4718	59.6842	17.3973	53.6336	31.6442	6.75935	7.08388	5.69554	5.66041	6.25382	6.18344	5.64467	3.98369	5.57714	4.08871	4.20435	3.49356	Detected	Detected	Detected	Detected	Detected	Detected	Detected	Not Detected	Detected	Detected	Detected	Detected	0	A_33_P3413905	A_33_P3413905	NM_024866	NM_024866	NM_024866	Hs.449099	79924	ADM2
A_33_P3314031	0.0347203	0.00141092	3.41546	up	64.8205	77.4614	25.0154	14.5008	376.186	398.794	29.5317	25.6256	46.2115	13.5904	102.647	47.0844	6.33395	6.74029	6.15029	5.19626	7.57218	8.46649	5.7543	5.1686	5.1911	3.70227	5.62355	4.38717	Detected	Detected	Detected	Detected	Detected	Detected	Detected	Detected	Detected	Not Detected	Detected	Detected	0	A_33_P3314031	A_33_P3314031	NM_152680	NM_152680	NM_152680	Hs.518900	201799	TMEM154
A_23_P118633	0.0357836	0.00162749	3.41501	up	3855.59	950.14	184.692	496.347	2073.71	1900.86	135.435	219.119	567.987	106.069	791.412	268.269	11.5567	9.72344	9.00555	10.0854	10.0072	10.6124	8.13088	8.67836	8.90634	7.50885	9.0816	8.05331	Detected	Detected	Detected	Detected	Detected	Detected	Detected	Detected	Detected	Detected	Detected	Detected	0	A_23_P118633	A_23_P118633	NM_022827	NM_022827	NM_022827	Hs.103147	64847	SPATA20
A_23_P1505	0.0434099	0.00293497	3.41372	up	356.492	740.698	54.3613	70.4594	398.005	589.22	37.2481	88.7268	233.964	41.5943	193.181	62.42	8.33306	9.41306	7.2755	7.52554	7.64451	8.9821	6.13425	7.25275	7.60403	5.67108	6.8415	5.04211	Detected	Detected	Detected	Detected	Detected	Detected	Detected	Detected	Detected	Detected	Detected	Detected	0	A_23_P1505	A_23_P1505	NM_002335	NM_002335	NM_002335	Hs.6347	4041	LRP5
A_23_P432591	0.0314018	0.000839273	3.4081	up	1493.48	2370.32	80.4368	234.425	1733.19	1271.23	162.313	203.989	341.279	80.4259	363.411	175.862	10.1941	10.991	7.82931	9.12011	9.74867	10.0411	8.4059	8.57008	8.16463	6.98836	7.875	7.30651	Detected	Detected	Detected	Detected	Detected	Detected	Detected	Detected	Detected	Detected	Detected	Detected	0	A_23_P432591	A_23_P432591	NM_176816	NM_176816	NM_176816	Hs.654850	202243	CCDC125
A_33_P3591321	0.0258475	0.000249533	3.40463	up	40.402	56.5014	16.5902	16.5266	34.2175	32.8472	15.9989	8.52177	30.5195	11.0363	30.2399	23.6806	5.77959	6.40145	5.56446	5.40345	4.30898	5.30164	4.75512	3.45749	4.55562	3.4152	3.0299	2.94123	Detected	Detected	Not Detected	Detected	Detected	Detected	Not Detected	Not Detected	Detected	Not Detected	Not Detected	Not Detected	0	A_33_P3591321	A_33_P3591321	BI767459		BI767459	Hs.736952
A_24_P256552	0.0419081	0.00261688	3.40445	up	369.006	540.012	56.1178	37.6814	1418.64	1401.33	61.86	63.4579	177.688	44.4173	336.195	93.2102	8.37659	9.00785	7.32336	6.6435	9.44152	10.1708	6.9416	6.69725	7.19633	5.79698	7.74731	5.9796	Detected	Detected	Detected	Detected	Detected	Detected	Detected	Detected	Detected	Detected	Detected	Detected	0	A_24_P256552	A_24_P256552	NM_001033505	NM_001033505	NM_001033505	Hs.44402	1479	CSTF3
A_33_P3333232	0.0308269	0.000742977	3.40175	up	10.8367	24.0279	5.50863	17.4024	39.5092	110.733	3.96143	5.39677	10.1152	14.9394	49.3246	30.9583	4.21296	5.5277	4.07315	5.48402	4.52538	6.84854	2.8726	2.93484	2.96276	3.84202	4.01578	3.44609	Not Detected	Detected	Not Detected	Detected	Detected	Detected	Not Detected	Not Detected	Not Detected	Not Detected	Detected	Detected	0	A_33_P3333232	A_33_P3333232	ENST00000621947				221262	CCDC162P
A_23_P160809	0.0415423	0.00255043	3.39683	up	685.265	242.417	29.8428	96.4609	144.764	195.936	40.8299	39.33	125.701	29.8478	121.853	60.2681	9.15792	8.03142	6.40608	7.95852	6.29313	7.55918	6.28313	5.88627	6.68015	5.03476	5.97508	4.96171	Detected	Detected	Detected	Detected	Detected	Detected	Detected	Detected	Detected	Detected	Detected	Detected	0	A_23_P160809	A_23_P160809	NM_007357	NM_007357	NM_007357	Hs.211800	22796	COG2
A_23_P91250	0.0335302	0.00119222	3.39517	up	177.913	399.537	12.8115	133.585	191.555	40.1779	20.2138	39.0011	42.6846	35.2908	78.2531	59.4969	7.50642	8.63148	5.20217	8.38549	6.67593	5.5796	5.13036	5.87223	5.06885	5.35473	5.04092	4.93311	Detected	Detected	Not Detected	Detected	Detected	Detected	Detected	Detected	Detected	Detected	Detected	Detected	0	A_23_P91250	A_23_P91250	NM_001270497	NM_001270497	NM_001270497	Hs.147041	55713	ZNF334
A_33_P3382331	0.0459203	0.00344908	3.39185	up	231.836	79.3538	22.8517	31.1379	194.25	83.8352	18.0245	22.1701	42.0479	11.3039	291.442	35.0295	7.82373	6.76554	6.01888	6.3707	6.69337	6.50666	4.95162	4.92639	5.04673	3.44946	7.52064	3.71161	Detected	Detected	Detected	Detected	Detected	Detected	Detected	Detected	Detected	Not Detected	Detected	Detected	0	A_33_P3382331	A_33_P3382331	NM_002155	NM_002155	NM_002155	Hs.654614	3310	HSPA6
A_23_P400298	0.0368855	0.00181051	3.3906	up	56.3463	57.4375	7.9393	23.7605	169.446	87.2022	19.0104	11.0235	44.682	11.817	53.6775	37.9419	6.167	6.42143	4.54435	5.95486	6.50658	6.55276	5.03476	3.80055	5.14217	3.50703	4.20631	3.88694	Detected	Detected	Not Detected	Detected	Detected	Detected	Detected	Detected	Detected	Not Detected	Detected	Detected	0	A_23_P400298	A_23_P400298	NM_022119	NM_022119	NM_022119	Hs.459709	64063	PRSS22
A_24_P328504	0.034266	0.00132703	3.38964	up	1462.93	656.673	129.483	141.799	3259.18	779.836	62.4993	133.967	500.547	73.5501	693.295	123.087	10.169	9.26283	8.50948	8.46853	10.6781	9.37629	6.95868	7.92486	8.71498	6.81241	8.89425	6.59223	Detected	Detected	Detected	Detected	Detected	Detected	Detected	Detected	Detected	Detected	Detected	Detected	0	A_24_P328504	A_24_P328504	NM_007237	NM_007237	NM_007237	Hs.632549	11262	SP140
A_33_P3345534	0.0316102	0.000895797	3.38539	up	88.5455	91.1162	26.3031	49.8936	733.786	605.423	48.8775	27.4681	40.2956	26.0027	172.132	79.8023	6.69349	6.92117	6.22343	7.05732	8.50332	9.02933	6.57628	5.28199	4.98477	4.78043	6.63181	5.61682	Detected	Detected	Detected	Detected	Detected	Detected	Detected	Detected	Detected	Detected	Detected	Detected	0	A_33_P3345534	A_33_P3345534	NM_000526	NM_000526	NM_000526	Hs.654380	3861	KRT14
A_23_P134914	0.032383	0.00101019	3.38513	up	29.5921	60.2878	15.1864	30.9431	27.5682	31.3911	14.4361	10.5688	30.4093	7.68598	34.6087	27.4074	5.4189	6.47287	5.43797	6.36103	3.98766	5.23631	4.58999	3.73968	4.55013	2.98984	3.27611	3.21371	Detected	Detected	Detected	Detected	Detected	Detected	Detected	Not Detected	Detected	Not Detected	Detected	Detected	0	A_23_P134914	A_23_P134914	NM_002347	NM_002347	NM_002347	Hs.159590	4062	LY6H
A_32_P223140	0.0308269	0.000749394	3.38245	up	4900.82	3497.57	212.605	1295.21	1622.95	1487	230.274	375.786	578.417	218.272	689.282	316.094	11.9178	11.5017	9.21058	11.2967	9.64763	10.2512	8.89967	9.49772	8.93316	8.73663	8.88185	8.3281	Detected	Detected	Detected	Detected	Detected	Detected	Detected	Detected	Detected	Detected	Detected	Detected	0	A_32_P223140	A_32_P223140	NM_145313	NM_145313	NM_145313	Hs.125293	221002	RASGEF1A
A_23_P103371	0.0280318	0.0003794	3.38007	up	125.408	77.3724	17.9471	40.3038	172.505	44.2345	11.6338	30.7225	39.5837	15.4863	86.0248	41.9229	7.0882	6.73879	5.67961	6.74279	6.53064	5.70805	4.2577	5.47139	4.95324	3.89976	5.24425	4.11943	Detected	Detected	Detected	Detected	Detected	Detected	Not Detected	Detected	Detected	Not Detected	Detected	Detected	0	A_23_P103371	A_23_P103371	NM_052998	NM_052998	NM_052998	Hs.101807	113451	AZIN2
A_23_P45786	0.0251343	0.000184021	3.37962	up	95.2271	198.28	22.6876	23.2919	132.423	87.1809	17.0383	21.7629	48.5958	16.3199	67.6477	60.2066	6.77717	7.79651	6.00803	5.92408	6.17584	6.55257	4.86157	4.89605	5.27025	3.98461	4.72138	4.95917	Detected	Detected	Detected	Detected	Detected	Detected	Detected	Detected	Detected	Detected	Detected	Detected	0	A_23_P45786	A_23_P45786	NM_001852	NM_001852	NM_001852	Hs.418012	1298	COL9A2
A_23_P104705	0.0391189	0.00215396	3.37901	up	355.086	160.87	17.8312	18.4258	153.348	161.292	16.4692	23.9693	69.1549	21.3253	93.3942	55.2361	8.32791	7.55635	5.66991	5.57098	6.36973	7.31669	4.80585	5.05787	5.79277	4.42749	5.42231	4.76569	Detected	Detected	Detected	Detected	Detected	Detected	Detected	Detected	Detected	Not Detected	Detected	Detected	0	A_23_P104705	A_23_P104705	NM_001532	NM_001532	NM_001532	Hs.569017	3177	SLC29A2
A_23_P211493	0.0352533	0.00151217	3.37876	up	109.832	165.98	53.6928	77.3209	21.7176	103.099	16.1426	28.485	145.523	17.3704	34.3562	59.8728	6.93548	7.59458	7.25952	7.65778	3.63908	6.76208	4.7693	5.34228	6.90139	4.08613	3.26375	4.94669	Detected	Detected	Detected	Detected	Detected	Detected	Not Detected	Detected	Detected	Not Detected	Detected	Detected	0	A_23_P211493	A_23_P211493	NM_153609	NM_153609	NM_153609	Hs.370885	164656	TMPRSS6
A_33_P3380807	0.0314018	0.000838514	3.37836	up	20.268	16.9972	3.54749	7.96702	116.51	32.7392	4.27662	6.44709	16.243	6.25576	49.8677	14.2775	4.96877	5.20466	3.40643	4.33645	6.01742	5.29698	2.97488	3.12126	3.58317	2.77082	4.04055	2.20209	Detected	Detected	Not Detected	Not Detected	Detected	Detected	Not Detected	Not Detected	Detected	Not Detected	Detected	Not Detected	0	A_33_P3380807	A_33_P3380807	NM_017442	NM_017442	NM_017442	Hs.87968	54106	TLR9
A_24_P239811	0.0477102	0.00384159	3.37736	up	325.328	814.308	60.1808	64.1399	893.888	121.487	82.8414	59.6319	214.478	12.4948	429.135	51.1555	8.21583	9.52811	7.4236	7.3984	8.77106	6.96459	7.39052	6.59431	7.47443	3.58689	8.13616	4.58391	Detected	Detected	Detected	Detected	Detected	Detected	Detected	Detected	Detected	Not Detected	Detected	Detected	0	A_24_P239811	A_24_P239811	NM_183008	NM_183008	NM_183008	Hs.145061	91544	UBXN11
A_33_P3387320	0.0278377	0.000374112	3.36978	up	28.8939	28.9126	6.29603	10.5478	68.3574	34.4717	4.5992	4.89805	20.8117	7.14133	45.7784	33.941	5.38982	5.71224	4.24705	4.7301	5.31633	5.36664	3.06501	2.83217	3.95365	2.90969	3.84503	3.6407	Detected	Detected	Not Detected	Detected	Detected	Detected	Not Detected	Not Detected	Detected	Not Detected	Detected	Detected	0	A_33_P3387320	A_33_P3387320	THC2542446
A_24_P101114	0.0414315	0.00253994	3.36926	up	298.629	378.742	36.8092	105.971	639.465	343.314	26.7737	93.9296	144.302	38.747	287.491	53.4806	8.11712	8.56623	6.71405	8.08274	8.3191	8.27971	5.60121	7.3493	6.88763	5.53301	7.50142	4.6918	Detected	Detected	Detected	Detected	Detected	Detected	Detected	Detected	Detected	Detected	Detected	Detected	0	A_24_P101114	A_24_P101114	NM_206999	NM_206999	NM_206999	Hs.460923	23019	CNOT1
A_33_P3310696	0.0265471	0.000286403	3.36904	up	109.798	57.5964	16.5936	18.8395	124.962	43.4891	15.7198	20.4101	48.0225	15.2359	53.9769	23.7745	6.93516	6.4245	5.56487	5.60436	6.10504	5.68529	4.72815	4.78604	5.25141	3.87237	4.21837	2.94884	Detected	Detected	Detected	Detected	Detected	Detected	Detected	Detected	Detected	Not Detected	Detected	Detected	0	A_33_P3310696	A_33_P3310696	NM_194458	NM_194458	NM_194458	Hs.191987	118424	UBE2J2
A_33_P3718679	0.0284338	0.000421673	3.36531	up	50.7408	112.177	12.9655	14.5546	39.721	38.1461	10.9538	12.6596	35.1334	9.5517	35.9741	33.689	6.044	7.15333	5.22014	5.20172	4.53434	5.50449	4.16749	4.00585	4.77145	3.23389	3.35039	3.62451	Detected	Detected	Detected	Detected	Detected	Detected	Not Detected	Not Detected	Detected	Not Detected	Detected	Detected	0	A_33_P3718679	A_33_P3718679	ENST00000563727		BC050067	Hs.631696	283731	LOC283731
A_23_P342934	0.0258353	0.000242911	3.36445	up	30.3864	64.8712	11.0732	14.8563	45.522	33.5	10.2183	13.0964	31.8562	8.69235	27.2848	25.5048	5.44674	6.55115	5.00765	5.23236	4.73997	5.32716	4.07124	4.05556	4.62173	3.12553	2.85168	3.07706	Detected	Detected	Not Detected	Detected	Detected	Detected	Not Detected	Not Detected	Detected	Not Detected	Detected	Detected	0	A_23_P342934	A_23_P342934	NM_005078	NM_005078	NM_005078	Hs.287362	7090	TLE3
A_33_P3291510	0.0265471	0.000307777	3.36331	up	58.7359	33.6688	39.28	37.7766	38.4252	23.8855	23.951	14.6873	44.5723	11.2068	21.4441	33.8318	6.21667	5.86485	6.80517	6.64778	4.48414	4.8527	5.41672	4.24333	5.13714	3.43731	2.50383	3.6337	Detected	Detected	Detected	Detected	Detected	Detected	Detected	Detected	Detected	Not Detected	Not Detected	Detected	0	A_33_P3291510	A_33_P3291510	NM_004679	NM_004679	NM_004679	Hs.632284	9084	VCY
A_32_P149546	0.0419042	0.00261577	3.36274	up	111.179	153.148	9.32166	22.4305	133.197	54.6172	11.487	13.7369	49.9128	12.1259	68.2805	55.8964	6.94965	7.50389	4.76732	5.86973	6.18243	5.98205	4.23843	4.13291	5.30747	3.5452	4.74147	4.79178	Detected	Detected	Not Detected	Detected	Detected	Detected	Not Detected	Detected	Detected	Not Detected	Detected	Detected	0	A_32_P149546	A_32_P149546	NM_014675	NM_014675	NM_014675	Hs.309403	9696	CROCC
A_21_P0010747	0.0383388	0.00204198	3.35767	up	8992.83	9944.6	1445.25	1242.77	7539.32	7265.13	600.708	1208.73	3695.25	269.23	3798.67	525.844	12.7312	12.9524	11.6523	11.2491	11.9968	12.6496	10.2501	11.1513	11.606	9.05404	11.5614	9.1239	Detected	Detected	Detected	Detected	Detected	Detected	Detected	Detected	Detected	Detected	Detected	Detected	0	A_21_P0010747	A_21_P0010747	NM_182905	NM_182905	NM_182905	Hs.459573	100287171	WASH1
A_23_P71904	0.0319114	0.00094736	3.35658	up	64.3444	78.8086	10.593	16.282	161.047	118.835	8.5311	27.6657	38.0001	17.4744	61.5124	34.7914	6.32591	6.75738	4.94762	5.37887	6.43858	6.93963	3.82117	5.29394	4.89162	4.09622	4.50762	3.69549	Detected	Detected	Not Detected	Detected	Detected	Detected	Not Detected	Detected	Detected	Detected	Detected	Detected	0	A_23_P71904	A_23_P71904	NM_014064	NM_014064	NM_014064	Hs.744027	28989	NTMT1
A_23_P76218	0.0410355	0.00248335	3.35575	up	170.567	272.118	31.647	85.6512	78.5696	243.253	35.2863	25.944	76.0815	21.3235	101.085	78.7363	7.45541	8.16203	6.49798	7.80077	5.50634	7.83254	6.04362	5.19042	5.93827	4.42731	5.59103	5.58461	Detected	Detected	Detected	Detected	Detected	Detected	Detected	Detected	Detected	Detected	Detected	Detected	0	A_23_P76218	A_23_P76218	NM_053283	NM_053283	NM_053283	Hs.350570	117159	DCD
A_23_P63232	0.0291191	0.000526078	3.34859	up	59.1407	93.9654	48.7094	25.4393	308.838	65.2885	6.68009	22.724	106.217	21.8573	173.928	30.002	6.22436	6.95582	7.11914	6.06083	7.30872	6.2021	3.50489	4.96964	6.4268	4.47017	6.65113	3.387	Detected	Detected	Detected	Detected	Detected	Detected	Not Detected	Detected	Detected	Detected	Detected	Detected	0	A_23_P63232	A_23_P63232	NM_130898	NM_130898	NM_130898	Hs.372924	148327	CREB3L4
A_23_P141779	0.0422002	0.00268082	3.34812	up	54.3607	38.3211	6.03511	10.9377	144.962	51.505	11.3549	12.991	38.1072	10.9003	44.4541	18.0996	6.12537	6.00033	4.19275	4.78464	6.29472	5.90647	4.2208	4.0432	4.89648	3.40025	3.77913	2.50433	Detected	Detected	Not Detected	Not Detected	Detected	Detected	Not Detected	Not Detected	Detected	Not Detected	Detected	Detected	0	A_23_P141779	A_23_P141779	NM_014593	NM_014593	NM_014593	Hs.180933	30827	CXXC1
A_33_P3610768	0.045532	0.00337604	3.34685	up	56.6939	43.3676	4.99003	13.7116	88.0883	45.5276	10.7154	5.52184	31.9194	18.333	44.5534	19.729	6.17491	6.12796	3.94387	5.11487	5.65752	5.74669	4.13536	2.95829	4.62526	4.17359	3.78403	2.63248	Detected	Detected	Not Detected	Detected	Detected	Detected	Not Detected	Not Detected	Detected	Detected	Detected	Not Detected	0	A_33_P3610768	A_33_P3610768	ENST00000611513		AK124265	Hs.718640
A_23_P152727	0.0387667	0.00210957	3.34345	up	152.289	196.669	22.1162	27.7686	196.793	185.585	28.6269	33.1337	98.5364	17.3953	95.2007	37.4225	7.322	7.78695	5.97262	6.19349	6.70829	7.49595	5.7075	5.59472	6.31811	4.08846	5.46432	3.85819	Detected	Detected	Detected	Detected	Detected	Detected	Detected	Detected	Detected	Detected	Detected	Detected	0	A_23_P152727	A_23_P152727	NM_014798	NM_014798	NM_014798	Hs.514242	9842	PLEKHM1
A_23_P359636	0.0366901	0.00178275	3.34268	up	738.883	273.943	73.4917	97.368	728.225	437.221	62.0534	110.509	171.99	51.9705	238.069	53.6904	9.24885	8.1697	7.70677	7.97159	8.49526	8.58299	6.94494	7.61927	7.1473	6.11422	7.20232	4.70107	Detected	Detected	Detected	Detected	Detected	Detected	Detected	Detected	Detected	Detected	Detected	Detected	0	A_23_P359636	A_23_P359636	NM_144695	NM_144695	NM_144695	Hs.552608	148362	BROX
A_21_P0010602	0.0425381	0.00275081	3.34175	up	103.84	148.337	8.44844	17.557	124.824	53.5034	12.1065	10.8028	42.4862	12.1005	73.1574	49.4394	6.87359	7.46535	4.63037	5.49796	6.10362	5.95609	4.31886	3.7713	5.06188	3.54299	4.89011	4.49821	Detected	Detected	Not Detected	Detected	Detected	Detected	Not Detected	Not Detected	Detected	Not Detected	Detected	Detected	0	A_21_P0010602	A_21_P0010602	NM_014675	NM_014675	NM_014675	Hs.309403	9696	CROCC
A_33_P3235690	0.0467011	0.00360665	3.34107	up	3934.84	3049.26	169.769	616.191	1693.01	2219.36	156.119	315.521	662.611	194.126	991.655	201	11.5815	11.3213	8.89105	10.3503	9.71152	10.8476	8.3467	9.23638	9.13402	8.55488	9.42892	7.56053	Detected	Detected	Detected	Detected	Detected	Detected	Detected	Detected	Detected	Detected	Detected	Detected	0	A_33_P3235690	A_33_P3235690	NM_001081550	NM_001081550	NM_001081550	Hs.149991	57187	THOC2
A_21_P0013603	0.0371388	0.00184181	3.33781	up	39.9079	57.0294	15.8714	17.8487	19.1827	14.8749	10.1463	3.64113	23.1444	9.09883	25.148	36.16	5.76522	6.41417	5.50099	5.5228	3.46392	4.16013	4.06157	2.51813	4.12879	3.17721	2.72182	3.78632	Detected	Detected	Not Detected	Detected	Detected	Detected	Not Detected	Not Detected	Detected	Not Detected	Detected	Detected	0	A_21_P0013603	A_21_P0013603	lnc-METTL11A-2:1			Hs.736830		lnc-METTL11A-2
A_23_P157620	0.0481923	0.00396397	3.33716	up	33.237	40.6413	3.98741	3.01743	115.597	60.8295	7.91366	11.2646	24.7985	3.32557	46.0727	14.657	5.55519	6.05936	3.6081	3.0364	6.00759	6.11872	3.71717	3.83158	4.23352	2.08034	3.8588	2.23223	Detected	Detected	Not Detected	Not Detected	Detected	Detected	Not Detected	Detected	Detected	Not Detected	Detected	Not Detected	0	A_23_P157620	A_23_P157620	NM_022749	NM_022749	NM_022749	Hs.491223	64760	FAM160B2
A_33_P3377364	0.0291273	0.000531129	3.33371	up	168.39	160.532	38.351	57.424	185.197	494.318	34.4867	32.5379	101.39	27.6278	95.9508	81.7885	7.43907	7.55401	6.77313	7.24576	6.63028	8.75464	6.00251	5.56439	6.35791	4.8918	5.48021	5.67729	Detected	Detected	Detected	Detected	Detected	Detected	Detected	Detected	Detected	Detected	Detected	Detected	0	A_33_P3377364	A_33_P3377364	NM_000213	NM_000213	NM_000213	Hs.632226	3691	ITGB4
A_23_P120982	0.0267948	0.000331573	3.32936	up	30.779	18.6106	6.01199	7.12805	21.999	30.8216	5.95055	3.57284	18.2505	4.18837	21.4327	26.3557	5.46228	5.29225	4.18911	4.18838	3.65747	5.2118	3.36696	2.49934	3.75365	2.33032	2.50319	3.13637	Detected	Detected	Not Detected	Not Detected	Detected	Detected	Not Detected	Not Detected	Detected	Not Detected	Not Detected	Detected	0	A_23_P120982	A_23_P120982	NM_006071	NM_006071	NM_006071	Hs.241383	10343	PKDREJ
A_23_P381172	0.034823	0.00142789	3.32136	up	42.9024	21.6794	4.2076	5.75134	21.1379	18.7596	4.02942	2.61316	9.39276	9.77714	28.0672	18.6903	5.85116	5.43321	3.69902	3.92356	3.60188	4.5006	2.89332	2.13141	2.87975	3.26184	2.89851	2.55397	Detected	Detected	Not Detected	Not Detected	Detected	Detected	Not Detected	Not Detected	Not Detected	Not Detected	Detected	Detected	0	A_23_P381172	A_23_P381172	NM_206898	NM_206898	NM_206898	Hs.584940	56246	MRAP
A_23_P205216	0.0493412	0.0042076	3.32075	up	342.309	380.761	46.4515	197.283	325.059	830.83	67.3863	71.7932	145.179	50.9379	207.785	71.0069	8.28089	8.57203	7.0543	8.9042	7.37473	9.4607	7.06959	6.90112	6.89762	6.07361	6.96936	5.34649	Detected	Detected	Detected	Detected	Detected	Detected	Detected	Detected	Detected	Detected	Detected	Detected	0	A_23_P205216	A_23_P205216	NM_006649	NM_006649	NM_006649	Hs.458598	10813	UTP14A
A_33_P3232993	0.0350078	0.00147395	3.31537	up	26.4105	21.228	4.44085	2.93618	33.9407	26.12	4.19198	9.83348	19.4037	3.3528	17.5052	5.72367	5.28192	5.41313	3.7817	2.99143	4.29872	4.97844	2.94792	3.63821	3.84693	2.08911	2.25663	1.59151	Detected	Detected	Not Detected	Not Detected	Detected	Detected	Not Detected	Not Detected	Detected	Not Detected	Not Detected	Not Detected	0	A_33_P3232993	A_33_P3232993	NM_001039469	NM_001039469	NM_001039469	Hs.567261	2011	MARK2
A_23_P100764	0.0400475	0.00232282	3.31518	up	435.205	203.436	103.862	66.9867	723.375	763.306	48.9844	107.372	177.841	49.7487	203.973	66.8331	8.58452	7.82752	8.19494	7.45489	8.4846	9.34565	6.57973	7.57577	7.19773	6.02252	6.93746	5.20438	Detected	Detected	Detected	Detected	Detected	Detected	Detected	Detected	Detected	Detected	Detected	Detected	0	A_23_P100764	A_23_P100764	NM_016016	NM_016016	NM_016016	Hs.744880	51629	SLC25A39
A_33_P3444555	0.0299782	0.00065375	3.3149	up	94.6206	435.424	34.9203	80.9756	104.619	78.2197	29.5985	29.5131	37.0389	34.9789	76.8443	74.4162	6.76992	8.73663	6.63947	7.72584	5.87996	6.42692	5.75881	5.40183	4.85161	5.33741	4.99886	5.45644	Detected	Detected	Detected	Detected	Detected	Detected	Detected	Detected	Detected	Detected	Detected	Detected	0	A_33_P3444555	A_33_P3444555
A_19_P00318461	0.0296776	0.000610735	3.30961	up	1723.34	2056.08	243.894	721.105	1432.38	588.378	163.179	153.487	649.448	118.971	414.687	226.506	10.3963	10.7785	9.39361	10.5716	9.45657	8.98121	8.41219	8.13189	9.10413	7.71737	8.08433	7.76789	Detected	Detected	Detected	Detected	Detected	Detected	Detected	Detected	Detected	Detected	Detected	Detected	0	A_19_P00318461	A_19_P00318461	ENST00000366424			Hs.640051	101927137	LOC101927137
A_24_P233014	0.0356256	0.00158813	3.30811	up	183.01	406.779	57.3093	69.4824	260.169	382.997	52.0005	27.7103	134.949	32.7372	159.574	83.2188	7.54027	8.65366	7.35497	7.5061	7.07675	8.41242	6.6765	5.29692	6.78716	5.21128	6.49777	5.71848	Detected	Detected	Detected	Detected	Detected	Detected	Detected	Detected	Detected	Detected	Detected	Detected	0	A_24_P233014	A_24_P233014	NM_153209	NM_153209	NM_153209	Hs.372773	124602	KIF19
A_33_P3422240	0.0467197	0.00361378	3.30265	up	219.875	169.676	21.3693	35.829	102.986	64.1932	32.126	14.2929	88.4201	9.46696	76.1927	64.4703	7.75882	7.61792	5.92439	6.57121	5.86074	6.18334	5.88991	4.19883	6.1634	3.22524	4.98029	5.11701	Detected	Detected	Detected	Detected	Detected	Detected	Detected	Detected	Detected	Not Detected	Detected	Detected	0	A_33_P3422240	A_33_P3422240	NM_020894	NM_020894	NM_020894	Hs.380475	57654	UVSSA
A_24_P202717	0.0349735	0.00145768	3.30251	up	52.9601	41.8649	34.3861	19.4734	141.211	120.502	21.6623	22.5401	67.0167	13.3419	67.5624	24.2564	6.09321	6.09112	6.61746	5.65521	6.25773	6.95495	5.24694	4.95488	5.74989	3.67667	4.71802	2.9819	Detected	Detected	Detected	Detected	Detected	Detected	Detected	Detected	Detected	Not Detected	Detected	Detected	0	A_24_P202717	A_24_P202717	NM_018049	NM_018049	NM_018049	Hs.501353	55111	PLEKHJ1
A_33_P3332492	0.0379845	0.00199144	3.30157	up	167.568	335.961	34.2077	65.9004	581.19	77.1622	58.4164	27.0279	76.7496	30.0147	82.3922	89.3365	7.43233	8.41329	6.61026	7.43267	8.18065	6.40981	6.85314	5.2555	5.95237	5.04531	5.15369	5.8801	Detected	Detected	Detected	Detected	Detected	Detected	Detected	Detected	Detected	Detected	Detected	Detected	0	A_33_P3332492	A_33_P3332492	NM_145235	NM_145235	NM_145235	Hs.352591	92565	FANK1
A_33_P3314550	0.0316102	0.000896187	3.29655	up	219.11	307.301	23.3866	88.2876	135.773	141.811	32.3757	35.1222	70.3618	29.9512	99.3613	60.6619	7.75452	8.30267	6.05425	7.84167	6.20615	7.15958	5.9024	5.69441	5.81884	5.04084	5.55885	4.97778	Detected	Detected	Detected	Detected	Detected	Detected	Detected	Detected	Detected	Detected	Detected	Detected	0	A_33_P3314550	A_33_P3314550	NM_002866	NM_002866	NM_002866	Hs.27744	5864	RAB3A
A_23_P64661	0.0308269	0.000757546	3.29463	up	19.6065	31.261	27.3347	28.4069	144.677	26.7775	11.4897	20.4356	49.2815	10.2811	35.2387	28.0404	4.92812	5.7912	6.28114	6.22555	6.29245	5.01148	4.23877	4.78865	5.28973	3.32407	3.31161	3.25641	Not Detected	Detected	Detected	Detected	Detected	Detected	Not Detected	Detected	Detected	Not Detected	Detected	Detected	0	A_23_P64661	A_23_P64661	NM_032496	NM_032496	NM_032496	Hs.437126	64333	ARHGAP9
A_23_P253389	0.0465033	0.00357148	3.29386	up	83.3499	166.272	23.5162	13.5248	309.937	175.485	12.0533	43.7734	96.1502	12.8881	137.116	28.6108	6.62736	7.59621	6.06242	5.09328	7.31427	7.42347	4.31332	6.06489	6.28204	3.62875	6.21435	3.29497	Detected	Detected	Detected	Detected	Detected	Detected	Not Detected	Detected	Detected	Not Detected	Detected	Detected	0	A_23_P253389	A_23_P253389	NM_003040	NM_003040	NM_003040	Hs.647069	6522	SLC4A2
A_23_P370989	0.0299727	0.000649511	3.2923	up	139.594	108.825	31.6784	40.3971	247.68	750.054	32.3872	42.0383	48.4138	33.81	97.6332	80.6838	7.21778	7.11845	6.50019	6.7467	7.00837	9.32177	5.90267	5.9967	5.26471	5.27209	5.51892	5.64359	Detected	Detected	Detected	Detected	Detected	Detected	Detected	Detected	Detected	Detected	Detected	Detected	0	A_23_P370989	A_23_P370989	NM_005914	NM_005914	NM_005914	Hs.460184	4173	MCM4
A_33_P3260623	0.0304218	0.000703834	3.29183	up	134.487	122.997	56.5717	69.6861	165.23	172.17	21.0433	35.219	100.856	24.7206	136.265	53.6279	7.16972	7.25861	7.33612	7.50911	6.47317	7.40074	5.1991	5.69868	6.34931	4.68806	6.2004	4.69857	Detected	Detected	Detected	Detected	Detected	Detected	Detected	Detected	Detected	Detected	Detected	Detected	0	A_33_P3260623	A_33_P3260623	NM_000932	NM_000932	NM_000932	Hs.523761	5331	PLCB3
A_23_P215461	0.0483596	0.0039978	3.28886	up	54.1662	20.9823	55.1226	23.3249	257.434	130.621	13.6718	48.2702	78.6583	15.8129	56.3843	33.0441	6.12047	5.40345	7.29492	5.92601	7.06137	7.05604	4.50762	6.23292	5.99006	3.93048	4.31456	3.5811	Detected	Detected	Detected	Detected	Detected	Detected	Not Detected	Detected	Detected	Detected	Detected	Detected	0	A_23_P215461	A_23_P215461	NM_002314	NM_002314	NM_002314	Hs.647035	3984	LIMK1
A_23_P131846	0.0250229	0.000145637	3.28834	up	82.6933	94.0836	26.5182	48.5548	146.947	77.9181	19.031	20.3646	56.2304	24.5663	75.4223	45.6247	6.61781	6.95658	6.23448	7.01537	6.31226	6.42212	5.03645	4.78204	5.48947	4.67658	4.95904	4.31088	Detected	Detected	Detected	Detected	Detected	Detected	Detected	Detected	Detected	Detected	Detected	Detected	0	A_23_P131846	A_23_P131846	NM_005985	NM_005985	NM_005985	Hs.48029	6615	SNAI1
A_24_P224776	0.0337446	0.00122628	3.28661	up	845.628	1135.27	608.876	733.468	709.058	877.557	141.008	259.34	614.988	75.7231	370.827	175.145	9.4187	9.96941	10.5589	10.5877	8.45544	9.53326	8.19408	8.93583	9.01947	6.8699	7.90699	7.29756	Detected	Detected	Detected	Detected	Detected	Detected	Detected	Detected	Detected	Detected	Detected	Detected	0	A_24_P224776	A_24_P224776	NM_012321	NM_012321	NM_012321	Hs.515255	25804	LSM4
A_24_P350744	0.0463974	0.00354492	3.28639	up	726.025	209.721	32.9835	52.257	528.932	608.193	34.6948	42.3288	147.577	52.2999	195.146	79.7087	9.22937	7.85894	6.55663	7.12119	8.03991	9.03403	6.0136	6.00769	6.92213	6.12613	6.85789	5.61361	Detected	Detected	Detected	Detected	Detected	Detected	Detected	Detected	Detected	Detected	Detected	Detected	0	A_24_P350744	A_24_P350744	NM_014949	NM_014949	NM_014949	Hs.24656	22889	KIAA0907
A_23_P357717	0.0317155	0.000903006	3.28591	up	176.991	207.916	22.9586	40.6317	132.757	367.258	30.9109	27.4186	89.534	26.5814	66.8815	78.0131	7.49961	7.84967	6.02537	6.75356	6.1792	8.36282	5.83023	5.27916	6.1821	4.82142	4.6939	5.56565	Detected	Detected	Detected	Detected	Detected	Detected	Detected	Detected	Detected	Detected	Detected	Detected	0	A_23_P357717	A_23_P357717	NM_021966	NM_021966	NM_021966	Hs.2484	8115	TCL1A
A_33_P3270445	0.0251343	0.000183044	3.28518	up	73.0163	67.5701	10.067	11.0214	40.5075	24.2862	17.8381	12.2473	22.9946	6.54127	34.5583	21.57	6.47266	6.59354	4.87508	4.79681	4.56396	4.87651	4.93593	3.9589	4.11718	2.81626	3.27406	2.78041	Detected	Detected	Not Detected	Not Detected	Detected	Detected	Detected	Detected	Detected	Not Detected	Detected	Detected	0	A_33_P3270445	A_33_P3270445	NM_001294335	NM_001294335	NM_001294335	Hs.524138	576	BAI2
A_23_P250385	0.0347472	0.00141666	3.28494	up	1119.02	1225.65	325.132	415.997	1813.84	1019.11	260.806	258.565	556.325	187.193	126.517	178.134	9.80281	10.0742	9.76316	9.87129	9.81596	9.74605	9.08578	8.9317	8.87912	8.49733	6.05349	7.33082	Detected	Detected	Detected	Detected	Detected	Detected	Detected	Detected	Detected	Detected	Detected	Detected	0	A_23_P250385	A_23_P250385	NM_005322	NM_005322	NM_005322	Hs.131956	3009	HIST1H1B
A_24_P336137	0.0258475	0.000256933	3.27526	up	62.288	97.3084	12.9649	26.1314	70.9631	50.2109	10.2767	16.4269	33.9004	17.8077	51.4739	41.7913	6.28604	6.99347	5.22004	6.10332	5.36736	5.87552	4.07866	4.42566	4.71807	4.12718	4.11303	4.11351	Detected	Detected	Not Detected	Detected	Detected	Detected	Not Detected	Detected	Detected	Detected	Detected	Detected	0	A_24_P336137	A_24_P336137	NM_032561	NM_032561	NM_032561	Hs.517612	84645	C22orf23
A_24_P57170	0.0438834	0.00302315	3.27182	up	813.243	638.88	59.9544	58.9168	504.408	565.444	60.6152	62.9995	221.528	41.4599	319.556	75.7174	9.36733	9.22937	7.41836	7.28268	7.97562	8.93047	6.9115	6.6847	7.52295	5.66373	7.66717	5.49324	Detected	Detected	Detected	Detected	Detected	Detected	Detected	Detected	Detected	Detected	Detected	Detected	0	A_24_P57170	A_24_P57170	NM_001039887	NM_001039887	NM_001039887	Hs.527982	148137	PROSER3
A_23_P309381	0.0223734	5.68e-05	3.27067	up	64.1456	30.4886	26.525	22.6237	60.9062	57.1871	20.5785	13.274	29.4121	16.5252	39.9194	37.4528	6.32246	5.76821	6.23482	5.88151	5.15716	6.04118	5.16117	4.07594	4.49707	4.0038	3.5506	3.85926	Detected	Detected	Detected	Detected	Detected	Detected	Detected	Detected	Detected	Detected	Detected	Detected	0	A_23_P309381	A_23_P309381	NM_001040874	NM_001040874	NM_001040874	Hs.745563	723790	HIST2H2AA4
A_33_P3227482	0.0353808	0.00154681	3.26885	up	479.192	390.614	44.4395	40.9747	201.422	343.895	20.8899	48.5015	107.631	45.5852	127.109	96.2309	8.69804	8.60845	6.98952	6.76763	6.7394	8.28183	5.18613	6.24166	6.44562	5.84707	6.0617	6.05001	Detected	Detected	Detected	Detected	Detected	Detected	Detected	Detected	Detected	Detected	Detected	Detected	0	A_33_P3227482	A_33_P3227482	NR_126038	NR_126038	NR_126038	Hs.167595	100533789	LRRC37A8P
A_21_P0012867	0.0319987	0.000974386	3.26226	up	365.851	236.001	43.9933	105.722	341.673	586.629	40.952	41.2099	117.337	42.2599	214.252	95.9352	8.36493	7.99678	6.97396	8.08039	7.44008	8.97808	6.28721	5.96443	6.57973	5.70135	7.02324	6.04303	Detected	Detected	Detected	Detected	Detected	Detected	Detected	Detected	Detected	Detected	Detected	Detected	0	A_21_P0012867	A_21_P0012867	ENST00000507037	XR_251925	XR_251925	Hs.535769	728554	LOC728554
A_33_P3279861	0.0253927	0.000188771	3.26142	up	1373.96	884.136	248.828	170.825	3615.33	1010.53	147.679	88.7971	494.644	93.4217	506.719	316.497	10.0816	9.63455	9.41547	8.72591	10.8499	9.73424	8.26015	7.25423	8.69763	7.27042	8.39631	8.32991	Detected	Detected	Detected	Detected	Detected	Detected	Detected	Detected	Detected	Detected	Detected	Detected	0	A_33_P3279861	A_33_P3279861	AF194718		AF194718	Hs.728758
A_23_P50000	0.0289652	0.000489965	3.2608	up	40.3342	16.2629	7.54737	28.7376	44.1465	43.1147	5.78737	14.0158	18.6988	14.5921	42.0325	25.0395	5.77732	5.16483	4.4804	6.24292	4.69398	5.67507	3.33642	4.16886	3.78819	3.80805	3.66202	3.03963	Detected	Not Detected	Not Detected	Detected	Detected	Detected	Not Detected	Not Detected	Detected	Detected	Detected	Detected	0	A_23_P50000	A_23_P50000	NM_024792	NM_024792	NM_024792	Hs.154396	79850	FAM57A
A_33_P3253799	0.0497157	0.0042858	3.2599	up	100.701	114.266	10.622	22.4646	203.655	43.7216	13.1546	24.2812	79.8541	12.4981	93.8985	17.9763	6.84119	7.17555	4.95172	5.87229	6.7523	5.69345	4.44827	5.07994	6.01391	3.58735	5.43368	2.49438	Detected	Detected	Not Detected	Detected	Detected	Detected	Not Detected	Detected	Detected	Not Detected	Detected	Detected	0	A_33_P3253799	A_33_P3253799	NM_001040451	NM_001040451	NM_001040451	Hs.306769	80230	RUFY1
A_23_P202053	0.0284338	0.000437714	3.25933	up	226.775	170.207	42.2147	131.604	67.1298	114.234	31.0017	26.25	77.4817	40.4108	69.513	68.0006	7.79856	7.62189	6.9115	8.36521	5.29126	6.88739	5.83501	5.20822	5.96721	5.61164	4.78048	5.2458	Detected	Detected	Detected	Detected	Detected	Detected	Detected	Detected	Detected	Detected	Detected	Detected	0	A_23_P202053	A_23_P202053	NM_002216	NM_002216	NM_002216	Hs.75285	3698	ITIH2
A_33_P3345186	0.0250229	0.000159167	3.2591	up	96.086	93.0676	25.7659	29.3896	140.416	56.5483	20.1145	21.4137	59.335	15.0218	58.2151	48.6852	6.78869	6.94688	6.19226	6.27982	6.24979	6.02664	5.12302	4.8673	5.56917	3.84922	4.38543	4.4631	Detected	Detected	Detected	Detected	Detected	Detected	Detected	Detected	Detected	Not Detected	Detected	Detected	0	A_33_P3345186	A_33_P3345186	NM_152889	NM_152889	NM_152889	Hs.292375	166012	CHST13
A_23_P43800	0.0254975	0.000210055	3.25635	up	256.788	103.413	38.4708	46.5923	156.444	206.536	32.6443	29.4483	75.3167	26.2988	93.7496	63.0046	7.93832	7.0625	6.77603	6.95198	6.3957	7.6263	5.91448	5.39771	5.92366	4.80196	5.43044	5.06303	Detected	Detected	Detected	Detected	Detected	Detected	Detected	Detected	Detected	Detected	Detected	Detected	0	A_23_P43800	A_23_P43800	NM_015201	NM_015201	NM_015201	Hs.645279	23246	BOP1
A_33_P3297345	0.0296759	0.000598667	3.25618	up	41.1605	73.6864	7.47321	8.90613	90.434	119.179	13.799	12.8356	20.9541	10.9236	46.9478	40.6891	5.80394	6.68863	4.46911	4.49025	5.69125	6.94283	4.52298	4.02453	3.96535	3.40312	3.90201	4.04892	Detected	Detected	Not Detected	Not Detected	Detected	Detected	Detected	Not Detected	Detected	Not Detected	Detected	Detected	0	A_33_P3297345	A_33_P3297345	NM_001105669	NM_001105669	NM_001105669	Hs.447851	164118	TTC24
A_23_P105409	0.0290935	0.000502087	3.25571	up	245.342	118.608	36.6327	70.9907	250.255	101.837	21.0972	33.3109	79.9558	24.2632	111.506	80.0699	7.88765	7.22012	6.70605	7.53611	7.02136	6.74617	5.20332	5.60345	6.01619	4.65513	5.79698	5.62457	Detected	Detected	Detected	Detected	Detected	Detected	Detected	Detected	Detected	Detected	Detected	Detected	0	A_23_P105409	A_23_P105409	NM_006301	NM_006301	NM_006301	Hs.713539	7786	MAP3K12
A_33_P3265376	0.0395417	0.00224787	3.25508	up	1193.64	313.379	46.5886	46.8367	274.374	448.768	45.0446	77.4032	131.434	38.0373	161.852	77.7652	9.89036	8.32663	7.05903	6.96026	7.14652	8.61963	6.44209	7.02126	6.74617	5.49425	6.52494	5.55756	Detected	Detected	Detected	Detected	Detected	Detected	Detected	Detected	Detected	Detected	Detected	Detected	0	A_33_P3265376	A_33_P3265376	NM_001145724	NM_001145724	NM_001145724	Hs.720208	9454	HOMER3
A_24_P203315	0.0369642	0.00182483	3.25384	up	38.107	87.2654	34.3263	14.4343	52.1834	139.184	16.4501	11.9752	102.913	13.7286	42.4224	35.4776	5.71185	6.87309	6.6153	5.1887	4.93538	7.13512	4.80339	3.92438	6.38059	3.71932	3.67923	3.73968	Detected	Detected	Detected	Detected	Detected	Detected	Detected	Not Detected	Detected	Not Detected	Detected	Detected	0	A_24_P203315	A_24_P203315	NM_182553	NM_182553	NM_182553	Hs.437072	254263	CNIH2
A_33_P3255165	0.034266	0.00132872	3.25099	up	696.102	243.499	428.001	184.859	297.973	288.072	66.5487	56.3511	134.094	63.5515	199.403	195.746	9.17901	8.03642	10.1169	8.82423	7.25952	8.04134	7.05119	6.49714	6.77877	6.5168	6.89731	7.511	Detected	Detected	Detected	Detected	Detected	Detected	Detected	Detected	Detected	Detected	Detected	Detected	0	A_33_P3255165	A_33_P3255165	NR_125373	NR_125373	NR_125373	Hs.713690	100132116	ACTA2-AS1
A_33_P3348270	0.0287846	0.00048452	3.25012	up	26.6056	24.7831	4.11778	24.293	33.6674	19.2931	4.55168	7.15776	10.4065	10.6434	43.1009	21.2957	5.28989	5.55702	3.6654	5.98753	4.28635	4.54131	3.05213	3.24041	2.99571	3.36696	3.71127	2.75807	Detected	Detected	Not Detected	Detected	Detected	Detected	Not Detected	Not Detected	Not Detected	Not Detected	Detected	Detected	0	A_33_P3348270	A_33_P3348270	ENST00000454561		X57615	Hs.737002
A_33_P3259443	0.0341166	0.00129089	3.24919	up	786.477	1466.84	67.9017	300.721	886.127	506.131	74.4146	82.4294	231.172	82.5272	341.133	174.438	9.32771	10.3136	7.59304	9.4666	8.75872	8.78436	7.22733	7.12699	7.58738	7.03902	7.7722	7.29063	Detected	Detected	Detected	Detected	Detected	Detected	Detected	Detected	Detected	Detected	Detected	Detected	0	A_33_P3259443	A_33_P3259443	XR_109175	XR_109175	XR_109175	Hs.635230	441728	LOC441728
A_23_P208334	0.033506	0.00117838	3.24889	up	252.177	417.13	115.904	108.75	302.789	265.401	68.1401	58.6587	272.958	32.7496	152.76	60.6946	7.92038	8.68464	8.35269	8.11712	7.28124	7.93791	7.08658	6.56759	7.83238	5.21241	6.41697	4.97837	Detected	Detected	Detected	Detected	Detected	Detected	Detected	Detected	Detected	Detected	Detected	Detected	0	A_23_P208334	A_23_P208334	NM_006202	NM_006202	NM_006202	Hs.89901	5141	PDE4A
A_33_P3286046	0.0286923	0.000474449	3.24666	up	268.412	373.772	25.6702	34.5805	287.525	144.826	39.1506	56.6166	86.9166	26.2082	85.6766	50.5877	7.98881	8.5506	6.18669	6.52186	7.20821	7.18512	6.21488	6.50617	6.13879	4.79635	5.23485	4.55651	Detected	Detected	Detected	Detected	Detected	Detected	Detected	Detected	Detected	Detected	Detected	Detected	0	A_33_P3286046	A_33_P3286046	NM_015448	NM_015448	NM_015448	Hs.658128	25911	DPCD
A_33_P3296499	0.0439602	0.00306059	3.24651	up	1473.35	1938.66	146.681	255.01	1472.5	1728.39	164.081	173.405	456.759	117.32	741.959	121.146	10.1775	10.703	8.68752	9.2415	9.4898	10.4717	8.42099	8.32701	8.58275	7.69244	8.99435	6.56008	Detected	Detected	Detected	Detected	Detected	Detected	Detected	Detected	Detected	Detected	Detected	Detected	0	A_33_P3296499	A_33_P3296499	NM_001291983	NM_001291983	NM_001291983	Hs.155919	5796	PTPRK
A_33_P3366064	0.0420248	0.00264889	3.2444	up	87.5438	104.972	13.9434	23.5324	171.701	113.054	12.5719	30.5463	64.9717	12.9935	102.577	30.6462	6.6819	7.07871	5.31978	5.93948	6.52428	6.87389	4.37676	5.46093	5.70397	3.63929	5.62248	3.42691	Detected	Detected	Not Detected	Detected	Detected	Detected	Detected	Detected	Detected	Not Detected	Detected	Detected	0	A_33_P3366064	A_33_P3366064	NM_199181	NM_199181	NM_199181	Hs.460807	140710	SOGA1
A_21_P0002828	0.0258353	0.00024014	3.24438	up	64.478	55.6675	18.6788	22.992	56.2081	42.782	17.6832	15.2948	28.7675	9.20717	56.6231	34.3074	6.32789	6.3865	5.73592	5.90416	5.04188	5.66468	4.92162	4.30941	4.4631	3.19125	4.32417	3.66382	Detected	Detected	Detected	Detected	Detected	Detected	Detected	Detected	Detected	Not Detected	Detected	Detected	0	A_21_P0002828	A_21_P0002828	ENST00000439479			Hs.581657
A_23_P16908	0.0364072	0.00172759	3.24414	up	163.933	113.458	9.44986	34.2024	174.228	233.852	19.625	35.1319	43.318	16.421	92.1707	54.7672	7.40409	7.16788	4.78689	6.5072	6.54558	7.78624	5.08565	5.69522	5.09236	3.99467	5.39593	4.74704	Detected	Detected	Not Detected	Detected	Detected	Detected	Detected	Detected	Detected	Not Detected	Detected	Detected	0	A_23_P16908	A_23_P16908	NM_198963	NM_198963	NM_198963	Hs.468226	90957	DHX57
A_24_P918175	0.0250229	0.000112727	3.24237	up	27.3816	17.1967	7.3214	9.8658	61.6386	21.4462	7.01795	7.40819	13.0792	3.26888	42.9096	30.5017	5.32404	5.21667	4.44194	4.63345	5.17509	4.69699	3.56487	3.27964	3.28106	2.0627	3.70005	3.41757	Detected	Detected	Not Detected	Not Detected	Detected	Detected	Not Detected	Not Detected	Not Detected	Not Detected	Detected	Detected	0	A_24_P918175	A_24_P918175	BC009864		BC009864	Hs.607889	653581	LOC653581
A_23_P46894	0.0290935	0.000513187	3.24069	up	36.664	25.1014	35.4025	21.8362	130.711	98.6804	14.4795	16.639	42.0831	19.8784	69.1618	27.9619	5.66932	5.56993	6.65873	5.82997	6.16195	6.70543	4.59424	4.44552	5.04807	4.30831	4.76983	3.25157	Detected	Detected	Detected	Detected	Detected	Detected	Detected	Detected	Detected	Detected	Detected	Detected	0	A_23_P46894	A_23_P46894	NM_020549	NM_020549	NM_020549	Hs.302002	1103	CHAT
A_23_P11237	0.0498402	0.0043099	3.23952	up	696.62	999.313	43.5565	180.111	716.927	772.629	48.4135	83.5901	249.74	69.7312	374.218	110.216	9.17987	9.78991	6.95903	8.79426	8.47137	9.36497	6.55809	7.15084	7.69732	6.7022	7.92028	6.35601	Detected	Detected	Detected	Detected	Detected	Detected	Detected	Detected	Detected	Detected	Detected	Detected	0	A_23_P11237	A_23_P11237	NM_004606	NM_004606	NM_004606	Hs.158560	6872	TAF1
A_33_P3251144	0.029219	0.000538114	3.23878	up	113.44	279.802	21.2531	22.6626	178.97	31.9073	27.9721	23.7461	57.4746	19.1916	68.309	30.2489	6.97129	8.19345	5.91679	5.88432	6.58194	5.26063	5.67075	5.04248	5.52552	4.25278	4.74239	3.40179	Detected	Detected	Detected	Detected	Detected	Detected	Detected	Detected	Detected	Not Detected	Detected	Detected	0	A_33_P3251144	A_33_P3251144	NM_001127370	NM_001127370	NM_001127370	Hs.744069	55536	CDCA7L
A_33_P3246258	0.047368	0.00374945	3.23551	up	259.84	523.451	26.018	72.8078	223.028	546.992	40.4187	35.5552	124.985	39.0535	140.229	88.0106	7.95374	8.96747	6.20712	7.57373	6.87598	8.89079	6.26682	5.71459	6.67098	5.54769	6.25782	5.84697	Detected	Detected	Detected	Detected	Detected	Detected	Detected	Detected	Detected	Detected	Detected	Detected	0	A_33_P3246258	A_33_P3246258	AK129520		AK129520	Hs.675058	25966	C2CD2
A_33_P3287039	0.0450656	0.00328882	3.23239	up	1193.1	406.517	100.798	207.138	459.692	1223.36	78.1295	92.9323	334.576	51.1088	317.327	138.82	9.88921	8.65253	8.14913	8.9689	7.84727	9.98967	7.30094	7.32863	8.13544	6.07959	7.65725	6.83925	Detected	Detected	Detected	Detected	Detected	Detected	Detected	Detected	Detected	Detected	Detected	Detected	0	A_33_P3287039	A_33_P3287039	NM_013342	NM_013342	NM_013342	Hs.590939	29844	TFPT
A_33_P3393734	0.0368465	0.00180706	3.22994	up	343.77	239.684	32.4067	85.4047	396.201	249.055	29.784	48.1937	122.85	33.4424	220.508	61.6433	8.28492	8.01697	6.53166	7.79627	7.63831	7.86218	5.76926	6.23058	6.64468	5.25238	7.07122	5.01316	Detected	Detected	Detected	Detected	Detected	Detected	Detected	Detected	Detected	Detected	Detected	Detected	0	A_33_P3393734	A_33_P3393734	ENST00000392558				6232	RPS27
A_23_P152678	0.0434202	0.00293911	3.22524	up	100.895	148.155	14.062	7.93298	186.185	67.9833	22.3842	12.9865	45.3263	18.7818	58.7884	33.1933	6.84316	7.46394	5.3314	4.33084	6.63729	6.25132	5.30198	4.04257	5.16328	4.21539	4.40737	3.59093	Detected	Detected	Detected	Not Detected	Detected	Detected	Detected	Detected	Detected	Detected	Detected	Detected	0	A_23_P152678	A_23_P152678	NM_015681	NM_015681	NM_015681	Hs.462445	27077	B9D1
A_23_P393766	0.0340066	0.00126943	3.22505	up	40.2906	30.6829	7.3351	14.8059	19.422	44.3918	6.00066	10.3261	30.9673	3.79424	20.6438	38.7809	5.7761	5.775	4.44457	5.22688	3.48115	5.71286	3.37764	3.70684	4.57692	2.22515	2.45603	3.93804	Detected	Detected	Not Detected	Detected	Detected	Detected	Not Detected	Not Detected	Detected	Not Detected	Not Detected	Detected	0	A_23_P393766	A_23_P393766	NM_173636	NM_173636	NM_173636	Hs.116244	284403	WDR62
A_32_P168349	0.0431927	0.00289064	3.2233	up	820.713	591.112	365.408	595.342	279.143	146.117	82.8546	58.4756	232.733	87.1094	194.71	186.064	9.37629	9.12011	9.90876	10.3172	7.16717	7.19703	7.39134	6.56084	7.59621	7.14045	6.85463	7.41191	Detected	Detected	Detected	Detected	Detected	Detected	Detected	Detected	Detected	Detected	Detected	Detected	0	A_32_P168349	A_32_P168349	NM_138277	NM_138277	NM_138277	Hs.247879	80739	C6orf25
A_24_P34611	0.0286923	0.00047454	3.22223	up	242.641	732.295	55.5828	101.375	199.323	257.518	44.9813	46.6647	97.8594	50.2028	116.397	105.208	7.87739	9.39276	7.30704	8.02488	6.72492	7.90305	6.43908	6.17409	6.3086	6.04463	5.88404	6.25125	Detected	Detected	Detected	Detected	Detected	Detected	Detected	Detected	Detected	Detected	Detected	Detected	0	A_24_P34611	A_24_P34611	NM_005413	NM_005413	NM_005413	Hs.567336	6496	SIX3
A_23_P41872	0.0314567	0.000864723	3.22047	up	192.844	180.523	30.3583	38.8994	214.171	176.779	33.6334	36.1108	84.4889	20.2242	125.908	46.6109	7.60189	7.68612	6.43407	6.68971	6.82479	7.43278	5.96237	5.74135	6.09625	4.33906	6.04331	4.36339	Detected	Detected	Detected	Detected	Detected	Detected	Detected	Detected	Detected	Detected	Detected	Detected	0	A_23_P41872	A_23_P41872	NM_007255	NM_007255	NM_007255	Hs.455109	11285	B4GALT7
A_23_P90014	0.0475519	0.00379609	3.21776	up	96.8183	80.6099	13.736	20.6183	206.911	196.631	16.8069	33.3995	57.8972	24.377	66.3028	32.2175	6.79858	6.78442	5.29799	5.74467	6.77753	7.56383	4.84082	5.60757	5.53651	4.66403	4.6725	3.52925	Detected	Detected	Detected	Detected	Detected	Detected	Detected	Detected	Detected	Detected	Detected	Detected	0	A_23_P90014	A_23_P90014	NM_001080452	NM_001080452	NM_001080452	Hs.167641	56927	GPR108
A_32_P35947	0.0338735	0.00124215	3.21125	up	47.2484	118.646	18.5229	9.95229	161.034	29.2483	26.2512	9.59924	26.754	9.41283	56.5281	39.3241	5.96469	7.22034	5.72537	4.64612	6.43837	5.13892	5.56765	3.60685	4.351	3.21878	4.32048	3.97025	Detected	Detected	Not Detected	Not Detected	Detected	Detected	Detected	Not Detected	Detected	Not Detected	Detected	Detected	0	A_32_P35947	A_32_P35947	ENST00000443866				728763	LOC728763
A_23_P393749	0.0250229	0.000169499	3.20743	up	44.8901	38.0158	10.2727	11.5034	65.5383	33.2466	9.44419	9.62474	25.2579	7.61899	46.6213	30.8617	5.90303	5.99252	4.90337	4.85492	5.25842	5.31727	3.96399	3.6098	4.2601	2.98167	3.88461	3.44086	Detected	Detected	Not Detected	Not Detected	Detected	Detected	Not Detected	Not Detected	Detected	Not Detected	Detected	Detected	0	A_23_P393749	A_23_P393749	NM_178019	NM_178019	NM_178019	Hs.631804	347732	CATSPER3
A_23_P5163	0.0332573	0.00111776	3.20672	up	208.879	117.482	18.1601	31.0895	251.251	194.205	23.372	37.2349	70.7138	23.4736	91.6225	49.2865	7.69984	7.20884	5.6971	6.36913	7.0281	7.54799	5.37193	5.79575	5.82647	4.5972	5.38214	4.49093	Detected	Detected	Detected	Detected	Detected	Detected	Detected	Detected	Detected	Detected	Detected	Detected	0	A_23_P5163	A_23_P5163	NM_020410	NM_020410	NM_020410	Hs.501794	57130	ATP13A1
A_23_P134650	0.0429112	0.00281719	3.20618	up	59.7708	39.9169	10.9225	5.4178	71.8943	70.8964	7.79353	18.2921	42.7254	7.90422	43.4293	19.227	6.2382	6.03958	4.98825	3.85069	5.38551	6.30186	3.69727	4.60611	5.07044	3.02185	3.72852	2.59477	Detected	Detected	Not Detected	Not Detected	Detected	Detected	Not Detected	Detected	Detected	Not Detected	Detected	Detected	0	A_23_P134650	A_23_P134650	NM_015545	NM_015545	NM_015545	Hs.632313	26024	PTCD1
A_32_P61495	0.0427816	0.00279595	3.20347	up	102.761	223.458	19.248	24.6469	148.643	27.7418	45.9215	13.5624	56.529	15.6553	53.2654	34.9735	6.86211	7.93162	5.7775	6.00976	6.3269	5.06328	6.47172	4.11185	5.49853	3.91516	4.18833	3.70777	Detected	Detected	Detected	Detected	Detected	Detected	Detected	Not Detected	Detected	Not Detected	Detected	Detected	0	A_32_P61495	A_32_P61495	NM_052929	NM_052929	NM_052929	Hs.659997	114827	FHAD1
A_23_P414252	0.0276517	0.000368221	3.20311	up	194.787	98.0759	48.7328	50.8154	415.081	170.04	31.3531	43.7319	107.121	23.1213	130.859	55.7707	7.61568	7.00282	7.11966	7.08295	7.70432	7.38423	5.85305	6.06364	6.43891	4.56947	6.121	4.78676	Detected	Detected	Detected	Detected	Detected	Detected	Detected	Detected	Detected	Detected	Detected	Detected	0	A_23_P414252	A_23_P414252	AK315670		AK315670	Hs.584900	29886	SNX8
A_23_P10135	0.0363103	0.0017151	3.20285	up	3913.81	2789.63	277.449	1108.41	1413.93	1624.18	190.368	317.008	865.698	174.737	711.657	339.399	11.5748	11.1934	9.56103	11.1032	9.43661	10.3799	8.6366	9.24418	9.53376	8.37843	8.93583	8.44404	Detected	Detected	Detected	Detected	Detected	Detected	Detected	Detected	Detected	Detected	Detected	Detected	0	A_23_P10135	A_23_P10135	NM_001001349	NM_001001349	NM_001001349	Hs.632252	28511	NKIRAS2
A_23_P3592	0.0398324	0.00228745	3.19804	up	222.956	385.908	43.2462	36.2341	308.235	662.095	50.6424	42.9095	125.67	39.313	122.962	72.617	7.77736	8.5937	6.94977	6.58736	7.30688	9.14891	6.63442	6.03197	6.67978	5.55899	5.99542	5.40028	Detected	Detected	Detected	Detected	Detected	Detected	Detected	Detected	Detected	Detected	Detected	Detected	0	A_23_P3592	A_23_P3592	NM_001040667	NM_001040667	NM_001040667	Hs.512156	3299	HSF4
A_23_P130856	0.0440583	0.00307866	3.19233	up	66.1805	66.4093	12.1115	18.1365	96.6605	96.0118	9.15568	18.5446	57.8279	22.0899	56.8267	25.9925	6.3593	6.57628	5.12465	5.54803	5.78048	6.6746	3.91741	4.62909	5.53459	4.4894	4.33213	3.11304	Detected	Detected	Not Detected	Detected	Detected	Detected	Not Detected	Detected	Detected	Detected	Detected	Detected	0	A_23_P130856	A_23_P130856	NM_032816	NM_032816	NM_032816	Hs.599703	84902	CEP89
A_23_P143274	0.032687	0.00106227	3.19117	up	56.2855	41.309	27.4648	17.7282	186.137	140.109	13.0907	34.8806	47.803	18.5373	61.4103	35.1056	6.16568	6.07658	6.28789	5.51345	6.63685	7.14468	4.44014	5.68192	5.24408	4.19337	4.50386	3.71724	Detected	Detected	Detected	Detected	Detected	Detected	Not Detected	Detected	Detected	Detected	Detected	Detected	0	A_23_P143274	A_23_P143274	NM_024958	NM_024958	NM_024958	Hs.416024	80023	NRSN2
A_23_P165989	0.0353465	0.0015237	3.18832	up	30.414	40.5381	3.01967	4.91664	39.0234	38.3851	3.48731	13.4545	14.6874	3.76489	32.1871	21.3524	5.44844	6.05778	3.12768	3.73326	4.50753	5.51302	2.69123	4.09755	3.43837	2.2155	3.14472	2.76356	Detected	Detected	Not Detected	Not Detected	Detected	Detected	Not Detected	Detected	Not Detected	Not Detected	Detected	Detected	0	A_23_P165989	A_23_P165989	NM_080749	NM_080749	NM_080749	Hs.609336	140825	NEURL2
A_23_P118834	0.0353984	0.00154926	3.1836	up	45.598	14.7658	19.8728	14.0972	68.3701	174.81	10.2772	9.08209	16.9643	36.3271	45.7103	43.2089	5.9231	5.07633	5.82406	5.15513	5.31674	7.41964	4.07874	3.53763	3.64312	5.40712	3.84152	4.18291	Detected	Not Detected	Not Detected	Detected	Detected	Detected	Not Detected	Not Detected	Detected	Detected	Detected	Detected	0	A_23_P118834	A_23_P118834	NM_001067	NM_001067	NM_001067	Hs.156346	7153	TOP2A
A_33_P3246513	0.0250229	0.000139139	3.1831	up	34.6203	32.1989	13.2223	12.2121	50.8205	11.9648	4.8879	11.1615	24.7607	8.83888	35.8871	20.2877	5.60585	5.82159	5.24649	4.94587	4.89449	3.86243	3.13998	3.81705	4.2311	3.145	3.34561	2.67539	Detected	Detected	Not Detected	Detected	Detected	Not Detected	Not Detected	Not Detected	Detected	Not Detected	Not Detected	Not Detected	0	A_33_P3246513	A_33_P3246513	NM_001362	NM_001362	NM_001362	Hs.49322	1735	DIO3
A_33_P3245671	0.0290184	0.000492957	3.17898	up	19.4007	25.9498	4.13386	5.61682	22.1115	13.5054	4.06335	3.71546	9.0998	2.95127	24.5073	22.4273	4.91496	5.60607	3.67171	3.89564	3.66531	4.02272	2.9053	2.53913	2.84325	1.94475	2.68492	2.84769	Detected	Detected	Not Detected	Not Detected	Detected	Detected	Not Detected	Not Detected	Not Detected	Not Detected	Detected	Detected	0	A_33_P3245671	A_33_P3245671	AK090626		AK090626	Hs.638549	100127940	LOC100127940
A_23_P111995	0.0258475	0.00024991	3.17512	up	23.2838	29.3903	7.97265	17.1209	127.377	17.3596	7.10711	15.2311	21.2804	13.3353	40.447	14.9454	5.13453	5.72838	4.55006	5.45972	6.12854	4.38376	3.58104	4.30229	3.99066	3.67577	3.57941	2.25497	Detected	Detected	Not Detected	Detected	Detected	Detected	Not Detected	Detected	Detected	Not Detected	Detected	Not Detected	0	A_23_P111995	A_23_P111995	NM_002318	NM_002318	NM_002318	Hs.626637	4017	LOXL2
A_21_P0000126	0.0348089	0.00142483	3.17498	up	167.731	149.747	12.7551	31.7498	85.1635	143.497	25.2022	17.9047	56.6816	19.0288	59.2764	62.7688	7.43305	7.47531	5.19451	6.40047	5.61343	7.17332	5.49989	4.56801	5.50228	4.23747	4.42718	5.05477	Detected	Detected	Not Detected	Detected	Detected	Detected	Detected	Detected	Detected	Detected	Detected	Detected	0	A_21_P0000126	A_21_P0000126	NM_001195259	NM_001195259	NM_001195259	Hs.646773	100507588	TGFBR3L
A_21_P0011381	0.0369173	0.00181754	3.17255	up	6686.02	7419.77	722.437	1412.09	6873.97	2888.5	410.996	701.273	2575.75	240.571	2784.12	477.553	12.324	12.5326	10.7873	11.4125	11.8457	11.2386	9.70973	10.392	11.1097	8.89105	11.0616	8.98262	Detected	Detected	Detected	Detected	Detected	Detected	Detected	Detected	Detected	Detected	Detected	Detected	0	A_21_P0011381	A_21_P0011381	NM_001267536	NM_001267536	NM_001267536	Hs.534573	643707	GOLGA6L4
A_23_P100315	0.0430274	0.0028469	3.16983	up	189.319	44.5288	4.10343	16.475	93.8688	26.6176	12.1608	17.7043	27.1128	9.34292	49.6232	25.413	7.57956	6.15485	3.65953	5.39938	5.74162	5.00385	4.32583	4.54831	4.37058	3.20928	4.02908	3.06931	Detected	Detected	Not Detected	Detected	Detected	Detected	Not Detected	Detected	Detected	Not Detected	Detected	Detected	0	A_23_P100315	A_23_P100315	NM_020664	NM_020664	NM_020664	Hs.628831	26063	DECR2
A_23_P66311	0.0285992	0.000464107	3.16894	up	320.983	226.709	38.4058	88.0267	119.988	96.2895	26.4345	36.945	86.2744	38.3541	66.0241	87.9258	8.2025	7.94616	6.77435	7.83673	6.0539	6.67725	5.57952	5.78054	6.12734	5.51208	4.66264	5.84477	Detected	Detected	Detected	Detected	Detected	Detected	Detected	Detected	Detected	Detected	Detected	Detected	0	A_23_P66311	A_23_P66311	NM_005223	NM_005223	NM_005223	Hs.629638	1773	DNASE1
A_23_P129425	0.0315704	0.000885439	3.1655	up	45.0602	101.481	10.9454	10.1147	87.2518	41.2581	17.2241	11.3873	29.1387	12.044	46.5231	28.2331	5.90719	7.0407	4.99132	4.66818	5.644	5.6173	4.87844	3.84693	4.4827	3.53652	3.87943	3.27006	Detected	Detected	Not Detected	Not Detected	Detected	Detected	Detected	Not Detected	Detected	Not Detected	Detected	Detected	0	A_23_P129425	A_23_P129425	NM_018430	NM_018430	NM_018430	Hs.632212	55815	TSNAXIP1
A_23_P212447	0.0366411	0.00177275	3.16453	up	168.621	234.881	23.4075	41.6635	394.884	78.7753	36.5461	37.4504	114.456	19.0158	118.776	35.853	7.44122	7.99017	6.05553	6.79209	7.6343	6.43549	6.10128	5.80635	6.54114	4.23638	5.92601	3.76568	Detected	Detected	Detected	Detected	Detected	Detected	Detected	Detected	Detected	Detected	Detected	Detected	0	A_23_P212447	A_23_P212447	NM_018262	NM_018262	NM_018262	Hs.655284	55764	IFT122
A_19_P00324550	0.0290935	0.000497921	3.15902	up	28.5855	20.7146	15.9552	12.1408	16.2735	23.9319	14.7044	15.0134	12.6921	6.72457	18.2357	12.386	5.37646	5.3914	5.50826	4.9364	3.23742	4.85545	4.61791	4.27955	3.24307	2.84407	2.31023	2.0537	Detected	Detected	Detected	Detected	Detected	Detected	Detected	Detected	Not Detected	Not Detected	Not Detected	Not Detected	0	A_19_P00324550	A_19_P00324550	NM_001122636	NM_001122636	NM_001122636	Hs.301062	50614	GALNT9
A_23_P312646	0.0318151	0.000915128	3.15786	up	226.246	139.52	40.3942	45.7431	229.117	210.165	33.9634	47.7088	104.451	20.7378	121.908	52.1072	7.79537	7.4005	6.84591	6.92594	6.9117	7.64775	5.97693	6.21121	6.40151	4.37924	5.97591	4.62868	Detected	Detected	Detected	Detected	Detected	Detected	Detected	Detected	Detected	Detected	Detected	Detected	0	A_23_P312646	A_23_P312646	NM_183241	NM_183241	NM_183241	Hs.409582	286257	C9orf142
A_33_P3261737	0.0393007	0.00221099	3.15785	up	46.047	42.2105	14.1161	11.6023	210.789	153.028	11.7585	20.2305	44.8854	10.2642	96.2499	29.2099	5.93396	6.09899	5.33705	4.8673	6.80182	7.25233	4.27517	4.77071	5.14867	3.3213	5.48724	3.33473	Detected	Detected	Not Detected	Not Detected	Detected	Detected	Not Detected	Detected	Detected	Not Detected	Detected	Detected	0	A_33_P3261737	A_33_P3261737	NM_001282647	NM_001282647	NM_001282647	Hs.21899	7355	SLC35A2
A_23_P47839	0.0447619	0.00323476	3.15317	up	550.808	382.714	43.367	142.37	217.062	413.273	39.5823	44.413	117.963	47.2225	248.094	102.572	8.87517	8.58145	6.9537	8.47453	6.84157	8.51072	6.23222	6.09103	6.58879	5.9182	7.26767	6.1984	Detected	Detected	Detected	Detected	Detected	Detected	Detected	Detected	Detected	Detected	Detected	Detected	0	A_23_P47839	A_23_P47839	NM_020936	NM_020936	NM_020936	Hs.286173	57696	DDX55
A_33_P3377391	0.0250229	0.000116511	3.15173	up	34.2513	27.6162	20.9682	29.6821	33.0532	20.9152	14.7891	14.7577	18.5723	18.3688	18.7632	28.0978	5.5918	5.66752	5.89858	6.2955	4.25787	4.66037	4.62742	4.2516	3.77756	4.17691	2.34128	3.26	Detected	Detected	Detected	Detected	Detected	Detected	Detected	Detected	Detected	Detected	Not Detected	Detected	0	A_33_P3377391	A_33_P3377391	NR_120337	NR_120337	NR_120337		101928611	LINC01413
A_23_P131866	0.0304218	0.000696962	3.14802	up	381.763	154.807	34.6898	42.1183	291.905	380.227	26.2781	44.5674	86.6353	40.2743	119.46	83.7711	8.41627	7.51553	6.63122	6.80802	7.22948	8.40324	5.5697	6.09682	6.13366	5.60521	5.93804	5.73369	Detected	Detected	Detected	Detected	Detected	Detected	Detected	Detected	Detected	Detected	Detected	Detected	0	A_23_P131866	A_23_P131866	NM_198433	NM_198433	NM_198433	Hs.250822	6790	AURKA
A_33_P3346498	0.0409904	0.00247974	3.14771	up	304.798	498.51	43.6567	120.175	612.774	844.899	54.0646	85.1866	132.13	58.5738	277.589	79.5551	8.14259	8.90769	6.96291	8.24515	8.25961	9.48463	6.73412	7.17952	6.75363	6.35473	7.44519	5.60957	Detected	Detected	Detected	Detected	Detected	Detected	Detected	Detected	Detected	Detected	Detected	Detected	0	A_33_P3346498	A_33_P3346498	NM_130831	NM_130831	NM_130831	Hs.594504	4976	OPA1
A_21_P0007641	0.048014	0.00390786	3.14617	up	25.9447	29.2245	2.58002	15.1958	15.8811	15.4218	6.686	3.16522	13.3864	4.45286	19.8118	19.1273	5.26143	5.72248	2.82943	5.2678	3.20207	4.21203	3.50582	2.36712	3.30869	2.39966	2.4047	2.58767	Detected	Detected	Not Detected	Detected	Detected	Detected	Not Detected	Not Detected	Not Detected	Not Detected	Not Detected	Detected	0	A_21_P0007641	A_21_P0007641	XR_424417	XR_424417	XR_424417	Hs.692668	102723712	LOC102723712
A_33_P3398526	0.0357836	0.00163478	3.14565	up	336.006	215.617	124.551	89.4757	3335.12	1173.32	51.8112	94.0668	225.651	83.5341	310.245	146.538	8.25735	7.89103	8.45133	7.85908	10.7243	9.93711	6.6709	7.35167	7.55102	7.05903	7.61585	6.95161	Detected	Detected	Detected	Detected	Detected	Detected	Detected	Detected	Detected	Detected	Detected	Detected	0	A_33_P3398526	A_33_P3398526	NM_207002	NM_207002	NM_207002	Hs.469658	10018	BCL2L11
A_33_P3330546	0.032572	0.00104934	3.14475	up	534.459	509.755	144.918	216.101	368.923	534.15	109.382	63.3653	271.092	50.1572	224.7	115.932	8.83568	8.93556	8.6678	9.02264	7.54437	8.85354	7.81779	6.69511	7.82319	6.04289	7.0993	6.46364	Detected	Detected	Detected	Detected	Detected	Detected	Detected	Detected	Detected	Detected	Detected	Detected	0	A_33_P3330546	A_33_P3330546	NM_152557	NM_152557	NM_152557	Hs.24643	155061	ZNF746
A_33_P3228828	0.030849	0.0007743	3.13614	up	38.8524	141.566	21.6514	21.6154	40.2885	38.1027	22.8032	14.619	31.4528	13.1556	32.7216	41.0163	5.73502	7.41454	5.94139	5.81259	4.55534	5.50268	5.33353	4.236	4.60094	3.65575	3.17364	4.06776	Detected	Detected	Detected	Detected	Detected	Detected	Detected	Detected	Detected	Not Detected	Detected	Detected	0	A_33_P3228828	A_33_P3228828
A_33_P3422330	0.0394419	0.00223386	3.13469	up	5606.06	8956.63	482.76	2328.51	6323.36	9742.44	490.341	984.29	1766.69	598.564	2411.26	844.6	12.1206	12.8175	10.2844	12.0903	11.7279	13.1333	9.97925	10.8492	10.5656	10.2083	10.837	9.84476	Detected	Detected	Detected	Detected	Detected	Detected	Detected	Detected	Detected	Detected	Detected	Detected	0	A_33_P3422330	A_33_P3422330	NM_198317	NM_198317	NM_198317	Hs.109212	339451	KLHL17
A_33_P3251518	0.0485858	0.0040558	3.13222	up	31.0885	24.5344	3.26678	3.39668	32.9399	24.6463	2.90933	5.41413	20.2679	5.02039	21.5561	17.3906	5.47417	5.54717	3.26427	3.22493	4.25302	4.89648	2.42814	2.93955	3.91375	2.5352	2.51076	2.44951	Detected	Detected	Not Detected	Not Detected	Detected	Detected	Not Detected	Not Detected	Detected	Not Detected	Not Detected	Not Detected	0	A_33_P3251518	A_33_P3251518	ENST00000467298		AK001508
A_33_P3391090	0.0290935	0.000512116	3.13186	up	66.8132	26.1084	11.3082	15.3897	108.625	15.9035	23.2733	4.15018	17.1032	7.61562	59.7705	31.6846	6.36933	5.61219	5.03399	5.28798	5.9278	4.25535	5.36618	2.65933	3.65609	2.98103	4.44552	3.49637	Detected	Detected	Not Detected	Detected	Detected	Detected	Detected	Not Detected	Detected	Not Detected	Detected	Detected	0	A_33_P3391090	A_33_P3391090	AK094921		AK094921	Hs.588117	100131763	LOC100131763
A_33_P3335940	0.0267944	0.000325113	3.13153	up	679.616	1086.88	140.652	365.85	841.859	963.438	129.575	150.526	288.698	97.5713	254.472	159.594	9.14613	9.907	8.62867	9.71152	8.69115	9.66029	8.06369	8.10004	7.9143	7.3577	7.30885	7.11897	Detected	Detected	Detected	Detected	Detected	Detected	Detected	Detected	Detected	Detected	Detected	Detected	0	A_33_P3335940	A_33_P3335940	NM_144570	NM_144570	NM_144570	Hs.513261	90861	HN1L
A_23_P167997	0.0265471	0.000306654	3.13059	up	7439.75	4724.36	1720.68	3975.43	6772.88	5165.95	883.394	1424.87	2003.11	785.987	970.62	1084.95	12.4684	11.906	11.8697	12.7809	11.8267	12.1181	10.7494	11.3705	10.7537	10.6175	9.39276	10.2072	Detected	Detected	Detected	Detected	Detected	Detected	Detected	Detected	Detected	Detected	Detected	Detected	0	A_23_P167997	A_23_P167997	NM_003518	NM_003518	NM_003518	Hs.591809	8339	HIST1H2BG
A_33_P3354106	0.0449284	0.00326324	3.13012	up	22.1569	283.574	10.4762	13.7733	125.637	27.1	6.17443	12.4826	20.216	16.6308	103.677	33.8088	5.07444	8.20921	4.93073	5.12039	6.1124	5.02887	3.41094	3.98578	3.91041	4.01456	5.64498	3.63209	Detected	Detected	Not Detected	Detected	Detected	Detected	Not Detected	Not Detected	Detected	Not Detected	Detected	Detected	0	A_33_P3354106	A_33_P3354106	NM_001145715	NM_001145715	NM_001145715	Hs.253050	402569	KPNA7
A_23_P22614	0.0286923	0.000476294	3.12255	up	1209.28	717.727	204.076	242.768	3221.87	278.229	138.041	214.142	354.74	78.3223	350.196	125.2	9.907	9.36567	9.15304	9.17265	10.6665	7.99628	8.15932	8.64309	8.22251	6.93391	7.81542	6.63058	Detected	Detected	Detected	Detected	Detected	Detected	Detected	Detected	Detected	Detected	Detected	Detected	0	A_23_P22614	A_23_P22614	NM_145802	NM_145802	NM_145802	Hs.496666	23157	Sept6
A_23_P24586	0.047236	0.00371213	3.1212	up	74.6914	56.3483	7.16664	6.72848	86.8803	67.1337	12.0685	18.3823	44.0551	5.54152	49.0473	21.193	6.49463	6.39829	4.41398	4.1146	5.63848	6.23611	4.31561	4.61507	5.11903	2.64183	4.00191	2.75006	Detected	Detected	Not Detected	Not Detected	Detected	Detected	Detected	Detected	Detected	Not Detected	Detected	Detected	0	A_23_P24586	A_23_P24586	NM_032592	NM_032592	NM_032592	Hs.126706	84680	ACCS
A_23_P254031	0.0481858	0.00395608	3.11944	up	22.3977	33.0569	4.82566	9.96085	21.5111	42.158	4.37663	12.2236	29.1845	5.88006	24.3473	12.659	5.08724	5.84718	3.89717	4.64774	3.62618	5.6453	3.00788	3.9556	4.48482	2.70497	2.67425	2.07558	Detected	Detected	Not Detected	Not Detected	Detected	Detected	Not Detected	Detected	Detected	Not Detected	Detected	Not Detected	0	A_23_P254031	A_23_P254031	NM_007344	NM_007344	NM_007344	Hs.54780	7270	TTF1
A_33_P3319585	0.0391008	0.00214149	3.11941	up	193.11	68.6851	15.1959	49.0148	75.8006	140.69	13.7282	22.5419	39.8762	26.2666	95.4148	54.5419	7.60374	6.61046	5.43902	7.03001	5.45557	7.15059	4.51526	4.95503	4.96633	4.79935	5.46867	4.73712	Detected	Detected	Not Detected	Detected	Detected	Detected	Detected	Detected	Detected	Detected	Detected	Detected	0	A_33_P3319585	A_33_P3319585	NM_001013690	NM_001013690	NM_001013690	Hs.648218	401720	FIGNL2
A_33_P3258997	0.0419042	0.00261595	3.11861	up	651.889	647.919	41.5014	73.6425	644.002	1177.59	93.9459	70.2559	200.623	52.4376	170.836	126.804	9.09402	9.24857	6.88821	7.58752	8.32725	9.94243	7.58871	6.86794	7.37714	6.13036	6.62055	6.65788	Detected	Detected	Detected	Detected	Detected	Detected	Detected	Detected	Detected	Detected	Detected	Detected	0	A_33_P3258997	A_33_P3258997	NM_024917	NM_024917	NM_024917	Hs.496501	79979	TRMT2B
A_23_P155477	0.0254975	0.000201531	3.11732	up	33.084	122.363	14.7877	29.211	30.5472	41.2965	13.6508	27.5772	28.66	13.9559	22.1412	37.3096	5.54948	7.25349	5.39964	6.27088	4.13965	5.61859	4.50555	5.28778	4.457	3.74349	2.54351	3.85258	Detected	Detected	Detected	Detected	Detected	Detected	Detected	Detected	Detected	Not Detected	Not Detected	Detected	0	A_23_P155477	A_23_P155477	NM_016210	NM_016210	NM_016210	Hs.517860	51161	C3orf18
A_24_P327815	0.0434373	0.00294413	3.11621	up	279.22	335.237	55.8967	105.142	316.994	479.47	31.9245	65.2953	138.523	32.9814	306.185	85.6851	8.03756	8.41179	7.31614	8.07258	7.34423	8.71094	5.88215	6.74323	6.82446	5.22374	7.59442	5.7865	Detected	Detected	Detected	Detected	Detected	Detected	Detected	Detected	Detected	Detected	Detected	Detected	0	A_24_P327815	A_24_P327815	NM_006819	NM_006819	NM_006819	Hs.337295	10963	STIP1
A_33_P3362128	0.0354749	0.0015643	3.1159	up	66.0913	19.9247	6.75081	15.7597	50.1115	45.0663	6.83403	5.85973	25.3374	11.1132	58.5744	31.8333	6.35791	5.35316	4.33844	5.32528	4.87421	5.73271	3.53175	3.01638	4.26576	3.42551	4.39916	3.50529	Detected	Detected	Not Detected	Detected	Detected	Detected	Not Detected	Not Detected	Detected	Not Detected	Detected	Detected	0	A_33_P3362128	A_33_P3362128	lnc-CCDC148-1:1		AK126351	Hs.630724		lnc-CCDC148-1
A_33_P3393504	0.0423745	0.00271698	3.11442	up	20.9112	18.5666	5.15799	19.5539	21.33	7.3408	2.72633	3.33229	19.2272	7.78461	18.8966	24.8117	5.00431	5.29037	3.9841	5.6624	3.61471	3.24623	2.33819	2.42359	3.83178	3.00395	2.34908	3.02175	Detected	Detected	Not Detected	Detected	Detected	Not Detected	Not Detected	Not Detected	Detected	Not Detected	Not Detected	Detected	0	A_33_P3393504	A_33_P3393504	ENST00000329256		AY189119	Hs.442337	338324	S100A7A
A_23_P1523	0.0262886	0.000278067	3.11341	up	83.3761	102.366	39.3561	16.9819	150.011	77.007	14.8298	18.3278	48.4209	23.396	95.947	44.8852	6.62813	7.04983	6.80802	5.44661	6.34026	6.40743	4.63156	4.60942	5.26501	4.59123	5.48007	4.272	Detected	Detected	Detected	Detected	Detected	Detected	Detected	Detected	Detected	Detected	Detected	Detected	0	A_23_P1523	A_23_P1523	NM_014578	NM_014578	NM_014578	Hs.15114	29984	RHOD
A_33_P3250521	0.0290935	0.00050917	3.11135	up	147.683	91.4075	35.2004	90.1932	169.553	89.1588	25.5004	18.0099	50.9504	31.2775	91.3185	96.4553	7.28529	6.92445	6.65161	7.86782	6.50753	6.58062	5.51947	4.5796	5.33951	5.12332	5.37447	6.05569	Detected	Detected	Detected	Detected	Detected	Detected	Detected	Detected	Detected	Detected	Detected	Detected	0	A_33_P3250521	A_33_P3250521	NM_199289	NM_199289	NM_199289	Hs.672144	341676	NEK5
A_33_P3317483	0.0258475	0.000256614	3.10989	up	88.0157	47.5948	21.5729	23.5512	39.8542	21.3506	12.6617	11.7711	27.1045	18.0912	46.3727	32.0504	6.68735	6.22192	5.93769	5.94083	4.53945	4.68984	4.38643	3.89679	4.3701	4.15082	3.87328	3.51849	Detected	Detected	Detected	Detected	Detected	Detected	Not Detected	Not Detected	Detected	Not Detected	Detected	Detected	0	A_33_P3317483	A_33_P3317483	NM_001048212	NM_001048212	NM_001048212	Hs.433499	752014	CEMP1
A_33_P3294901	0.0497961	0.00430065	3.10886	up	908.693	381.338	44.5209	92.3093	471.327	871.061	71.8136	91.8833	176.471	54.635	219.409	80.0259	9.51421	8.57651	6.99152	7.89913	7.88171	9.52742	7.17506	7.30931	7.18499	6.21533	7.06428	5.6232	Detected	Detected	Detected	Detected	Detected	Detected	Detected	Detected	Detected	Detected	Detected	Detected	0	A_33_P3294901	A_33_P3294901	NM_001017390	NM_001017390	NM_001017390	Hs.744871	445329	SULT1A4
A_23_P75663	0.0356126	0.00158293	3.1088	up	45.9749	62.742	3.41391	19.8669	46.413	28.6106	7.12044	10.0595	13.1538	8.72603	43.3989	42.1992	5.93236	6.51412	3.34144	5.68719	4.76667	5.10904	3.58338	3.67082	3.28844	3.1301	3.72668	4.13326	Detected	Detected	Not Detected	Detected	Detected	Detected	Not Detected	Not Detected	Not Detected	Not Detected	Detected	Detected	0	A_23_P75663	A_23_P75663	NM_001001965	NM_001001965	NM_001001965	Hs.553639	219875	OR4D5
A_33_P3359858	0.0339155	0.00125567	3.10784	up	2775.95	3536.3	450.811	1320.81	2575.89	1087.69	150.181	335.468	1566.24	284.941	699.077	333.366	11.0882	11.5128	10.1814	11.3262	10.3486	9.83595	8.28528	9.33715	10.3901	9.14122	8.90815	8.41571	Detected	Detected	Detected	Detected	Detected	Detected	Detected	Detected	Detected	Detected	Detected	Detected	0	A_33_P3359858	A_33_P3359858	NR_122074	NR_122074	NR_122074	Hs.652337	400997	LOC400997
A_33_P3333800	0.0380475	0.00200555	3.10492	up	215.886	121.262	31.4899	52.3281	163.407	89.8016	26.9825	34.0807	104.474	15.4044	120.112	46.0807	7.73745	7.24374	6.49065	7.12331	6.45724	6.58857	5.61356	5.64304	6.40212	3.89147	5.94712	4.33632	Detected	Detected	Detected	Detected	Detected	Detected	Detected	Detected	Detected	Detected	Detected	Detected	0	A_33_P3333800	A_33_P3333800	NM_172168	NM_172168	NM_172168	Hs.191762	124056	NOXO1
A_21_P0014688	0.0440009	0.00306851	3.10038	up	1556.33	704.78	57.7488	107.751	646.917	972.852	78.9905	55.3208	225.601	60.4281	379.708	204.538	10.2483	9.3483	7.36552	8.10394	8.33374	9.67402	7.31743	6.4624	7.55092	6.4147	7.94415	7.58959	Detected	Detected	Detected	Detected	Detected	Detected	Detected	Detected	Detected	Detected	Detected	Detected	0	A_21_P0014688	A_21_P0014688	NR_103772	NR_103772	NR_103772	Hs.744813	100288162	LOC100288162
A_23_P114670	0.0357836	0.00163274	3.0976	up	50.2899	26.0215	18.3842	17.0087	82.7882	81.3282	13.2037	23.2291	35.3474	12.3298	60.5452	21.6021	6.03279	5.60855	5.71452	5.44976	5.57603	6.47424	4.45449	5.0064	4.78129	3.56794	4.47565	2.78321	Detected	Detected	Detected	Detected	Detected	Detected	Detected	Detected	Detected	Not Detected	Detected	Detected	0	A_23_P114670	A_23_P114670	NM_014448	NM_014448	NM_014448	Hs.87435	27237	ARHGEF16
A_23_P80626	0.0299502	0.000645396	3.097	up	39.6847	27.618	11.099	25.4497	63.663	29.8407	6.0763	15.2956	32.794	10.3498	50.5741	29.0686	5.75859	5.66764	5.01093	6.06155	5.21802	5.16757	3.39176	4.30948	4.66956	3.33119	4.0717	3.32536	Detected	Detected	Not Detected	Detected	Detected	Detected	Not Detected	Not Detected	Detected	Not Detected	Detected	Detected	0	A_23_P80626	A_23_P80626	NM_207351	NM_207351	NM_207351	Hs.598147	285368	PRRT3
A_24_P13381	0.0319756	0.000971475	3.09674	up	33.2912	46.5823	9.95809	5.59867	69.6412	48.7741	15.8316	7.94261	22.6068	9.25915	29.568	32.147	5.55725	6.19906	4.85919	3.89259	5.34211	5.83834	4.73754	3.36644	4.08914	3.19886	2.98712	3.52494	Detected	Detected	Not Detected	Not Detected	Detected	Detected	Detected	Not Detected	Detected	Not Detected	Detected	Detected	0	A_24_P13381	A_24_P13381	NM_147204	NM_147204	NM_147204	Hs.506713	59341	TRPV4
A_23_P46871	0.0353808	0.00154587	3.09639	up	118.638	94.3422	14.7107	16.5936	147.755	130.956	15.2554	36.7576	61.8537	10.4367	69.429	43.1113	7.02556	6.95979	5.39163	5.41163	6.3183	7.05877	4.68093	5.77166	5.63153	3.34137	4.7777	4.17896	Detected	Detected	Detected	Detected	Detected	Detected	Detected	Detected	Detected	Not Detected	Detected	Detected	0	A_23_P46871	A_23_P46871	NM_018344	NM_018344	NM_018344	Hs.438419	55315	SLC29A3
A_23_P386942	0.0428713	0.00280747	3.0942	up	1710.91	3838.47	157.936	607.982	2081.56	4704.71	200.114	234.901	626.617	204.854	906.554	450.982	10.3857	11.6307	8.79691	10.3367	10.0128	11.9711	8.7039	8.78616	9.04563	8.63902	9.28902	8.8928	Detected	Detected	Detected	Detected	Detected	Detected	Detected	Detected	Detected	Detected	Detected	Detected	0	A_23_P386942	A_23_P386942	NM_145173	NM_145173	NM_145173	Hs.172753	148252	DIRAS1
A_24_P298420	0.0488705	0.00411054	3.09274	up	71.8874	49.6417	6.51456	6.42783	78.7095	55.7742	7.10963	18.5752	33.5748	9.86311	48.7479	19.832	6.45526	6.26682	4.29223	4.05731	5.50952	6.00943	3.58153	4.63113	4.70267	3.27469	3.98656	2.64066	Detected	Detected	Not Detected	Not Detected	Detected	Detected	Not Detected	Detected	Detected	Not Detected	Detected	Detected	0	A_24_P298420	A_24_P298420	NM_001039619	NM_001039619	NM_001039619	Hs.367854	10419	PRMT5
A_23_P402778	0.0258353	0.000235697	3.09016	up	102.382	72.6881	15.2146	33.6526	36.3664	54.1072	20.6198	14.5098	28.2095	21.7293	40.4814	43.5352	6.85779	6.67198	5.44076	6.48676	4.40149	5.97035	5.16483	4.22244	4.43265	4.4611	3.58121	4.20082	Detected	Detected	Not Detected	Detected	Detected	Detected	Detected	Detected	Detected	Detected	Detected	Detected	0	A_23_P402778	A_23_P402778	NM_138700	NM_138700	NM_138700	Hs.509439	135644	TRIM40
A_33_P3348519	0.0325402	0.00104333	3.08682	up	303.362	271.307	46.1712	65.6107	301.276	189.501	34.1959	60.2629	140.386	28.2451	162.258	58.5313	8.1352	8.15736	7.0453	7.42779	7.27369	7.51976	5.98895	6.61077	6.8445	4.93321	6.52973	4.8952	Detected	Detected	Detected	Detected	Detected	Detected	Detected	Detected	Detected	Detected	Detected	Detected	0	A_33_P3348519	A_33_P3348519	NR_104178	NR_104178	NR_104178	Hs.713607	100128494	LOC100128494
A_23_P135061	0.0337917	0.00123144	3.08648	up	50.006	31.889	11.0265	6.55454	69.3936	48.4725	9.90651	5.96312	40.1894	7.49724	50.0861	28.3072	6.02672	5.81185	5.0023	4.08195	5.33695	5.83023	4.02932	3.03558	4.98029	2.96263	4.05083	3.2756	Detected	Detected	Not Detected	Not Detected	Detected	Detected	Not Detected	Not Detected	Detected	Not Detected	Detected	Detected	0	A_23_P135061	A_23_P135061	NM_003389	NM_003389	NM_003389	Hs.113094	7464	CORO2A
A_24_P408704	0.0374661	0.00189465	3.08602	up	550.211	178.904	111.495	103.361	2031.31	106.162	29.4282	93.1003	265.047	39.2702	341.806	82.8694	8.87336	7.67565	8.29338	8.05083	9.97748	6.79831	5.7498	7.33197	7.79047	5.55638	7.77559	5.71032	Detected	Detected	Detected	Detected	Detected	Detected	Detected	Detected	Detected	Detected	Detected	Detected	0	A_24_P408704	A_24_P408704	NM_004946	NM_004946	NM_004946	Hs.586174	1794	DOCK2
A_33_P3413394	0.0314567	0.000859514	3.08574	up	52.6673	59.6078	13.6098	13.2201	40.6022	35.7361	7.61166	8.12905	27.8445	12.9699	47.22	41.5032	6.08612	6.46157	5.28495	5.05959	4.56769	5.41385	3.66646	3.39396	4.41072	3.63674	3.91527	4.09692	Detected	Detected	Not Detected	Detected	Detected	Detected	Not Detected	Not Detected	Detected	Not Detected	Detected	Detected	0	A_33_P3413394	A_33_P3413394	ENST00000421794		BC110596		353174	ZACN
A_23_P253958	0.0353808	0.00154484	3.0848	up	415.73	201.089	21.1728	28.6781	220.491	220.48	17.9615	57.5223	28.5398	45.3978	111.974	83.843	8.52161	7.81438	5.91244	6.23971	6.86202	7.71109	4.94629	6.53312	4.4497	5.83985	5.80533	5.73592	Detected	Detected	Detected	Detected	Detected	Detected	Detected	Detected	Detected	Detected	Detected	Detected	0	A_23_P253958	A_23_P253958	NM_005824	NM_005824	NM_005824	Hs.567412	10234	LRRC17
A_24_P118247	0.0354749	0.00156302	3.08434	up	52.7553	82.387	26.3451	37.9843	123.856	62.7386	18.5248	21.9865	49.6158	11.0471	115.078	36.2965	6.08843	6.81023	6.22555	6.65607	6.09274	6.15445	4.99399	4.91272	5.29934	3.41726	5.85981	3.79457	Detected	Detected	Detected	Detected	Detected	Detected	Detected	Detected	Detected	Not Detected	Detected	Detected	0	A_24_P118247	A_24_P118247	NM_001012762	NM_001012762	NM_001012762	Hs.592074	348180	CTU2
A_23_P219117	0.028539	0.000447459	3.08155	up	59.2299	60.3626	14.431	13.321	70.6302	25.4575	15.7262	17.0056	45.4965	5.9437	44.3143	22.1765	6.22712	6.47392	5.36633	5.07022	5.36043	4.94023	4.7288	4.48135	5.1689	2.71686	3.77215	2.82825	Detected	Detected	Detected	Detected	Detected	Detected	Detected	Detected	Detected	Not Detected	Detected	Detected	0	A_23_P219117	A_23_P219117	NM_001978	NM_001978	NM_001978	Hs.106124	2039	DMTN
A_23_P130149	0.0392982	0.00219887	3.08078	up	117.669	56.5599	12.6811	15.2436	130.284	88.6596	10.9848	18.691	56.817	15.0137	75.5926	35.4818	7.01633	6.40321	5.18682	5.27343	6.15667	6.57376	4.17147	4.64077	5.50599	3.84855	4.96371	3.73996	Detected	Detected	Not Detected	Detected	Detected	Detected	Not Detected	Detected	Detected	Detected	Detected	Detected	0	A_23_P130149	A_23_P130149	NM_001976	NM_001976	NM_001976	Hs.224171	2027	ENO3
A_33_P3220047	0.0265471	0.000307971	3.08011	up	911.339	1287.22	125.867	158.951	2475.35	475.298	78.6655	128.462	318.757	76.1637	599.731	169.036	9.51926	10.1394	8.47202	8.62662	10.2828	8.6978	7.31148	7.85584	8.06146	6.88138	8.66078	7.22912	Detected	Detected	Detected	Detected	Detected	Detected	Detected	Detected	Detected	Detected	Detected	Detected	0	A_33_P3220047	A_33_P3220047	NM_030767	NM_030767	NM_030767	Hs.494895	80709	AKNA
A_24_P250227	0.0362578	0.0017078	3.0791	up	274.033	353.108	31.4023	38.3365	342.579	650.395	34.3055	43.1537	102.575	42.1756	150.368	93.2902	8.01444	8.47247	6.486	6.66896	7.44381	9.12518	5.99335	6.04101	6.37567	5.69774	6.3868	5.98125	Detected	Detected	Detected	Detected	Detected	Detected	Detected	Detected	Detected	Detected	Detected	Detected	0	A_24_P250227	A_24_P250227	NM_021724	NM_021724	NM_021724	Hs.592130	9572	NR1D1
A_24_P73599	0.0380119	0.00199559	3.07892	up	48.9603	17.3652	2.92885	6.47951	40.6288	22.651	4.8956	7.61267	15.3891	7.26053	22.6249	18.1912	6.00408	5.22563	3.06901	4.06698	4.56845	4.77432	3.14199	3.31294	3.50603	2.92773	2.57267	2.51255	Detected	Detected	Not Detected	Not Detected	Detected	Detected	Not Detected	Not Detected	Detected	Not Detected	Not Detected	Not Detected	0	A_24_P73599	A_24_P73599	NM_172217	NM_172217	NM_172217	Hs.459095	3603	IL16
A_33_P3320493	0.0345259	0.0013727	3.07686	up	62.9999	100.715	12.1098	18.0247	50.3154	23.8172	12.9681	10.3434	33.3094	17.1117	54.6673	22.591	6.30122	7.03303	5.12448	5.5374	4.87942	4.84906	4.42501	3.70974	4.69171	4.06029	4.24846	2.86065	Detected	Detected	Not Detected	Detected	Detected	Detected	Detected	Not Detected	Detected	Detected	Detected	Detected	0	A_33_P3320493	A_33_P3320493	AJ271790		AJ271790	Hs.727059	10743	RAI1
A_33_P3416420	0.0258475	0.000259642	3.07667	up	57.5016	64.5709	24.9088	48.7212	108.466	105.38	21.5389	21.3316	47.0424	26.2907	59.2981	46.1399	6.19165	6.54558	6.14407	7.0204	5.92566	6.78896	5.23831	4.86166	5.22004	4.801	4.42783	4.33924	Detected	Detected	Detected	Detected	Detected	Detected	Detected	Detected	Detected	Detected	Detected	Detected	0	A_33_P3416420	A_33_P3416420	NM_145062	NM_145062	NM_145062	Hs.29857	221302	ZUFSP
A_33_P3588134	0.028656	0.000471264	3.07124	up	63.5545	73.5587	83.3398	27.1435	57.3995	78.2394	24.8573	10.2737	90.5353	26.5782	50.4469	50.7102	6.31146	6.68689	7.87988	6.16089	5.07125	6.42746	5.47791	3.69837	6.19824	4.82121	4.06625	4.56294	Detected	Detected	Detected	Detected	Detected	Detected	Detected	Not Detected	Detected	Detected	Detected	Detected	0	A_33_P3588134	A_33_P3588134	NM_052839	NM_052839	NM_052839	Hs.440092	56666	PANX2
A_24_P276490	0.0318469	0.000939251	3.06956	up	26.0272	33.0441	7.37609	6.48176	101.867	22.4277	5.87282	19.3145	30.2673	2.92321	43.4866	15.2682	5.26568	5.84661	4.45141	4.06776	5.84622	4.76059	3.3522	4.69296	4.54356	1.9261	3.73156	2.28371	Detected	Detected	Not Detected	Not Detected	Detected	Detected	Not Detected	Detected	Detected	Not Detected	Detected	Not Detected	0	A_24_P276490	A_24_P276490	NM_007260	NM_007260	NM_007260	Hs.533479	11313	LYPLA2
A_33_P3347012	0.0267948	0.000325858	3.06879	up	71.1507	64.6438	25.3483	37.9465	49.9665	75.3042	20.405	26.0886	37.4049	17.408	49.7608	40.1657	6.44509	6.54732	6.16829	6.6545	4.87017	6.3802	5.14649	5.20058	4.86762	4.08974	4.03543	4.0197	Detected	Detected	Detected	Detected	Detected	Detected	Detected	Detected	Detected	Detected	Detected	Detected	0	A_33_P3347012	A_33_P3347012	DB462629		DB462629	Hs.647778
A_33_P3375398	0.0374904	0.00190355	3.06817	up	377.941	178.801	486.436	188.321	231.978	382.092	57.8258	62.3396	175.35	57.2234	214.251	139.385	8.40347	7.67497	10.2975	8.84939	6.92882	8.40962	6.83641	6.66795	7.17622	6.30733	7.02309	6.84854	Detected	Detected	Detected	Detected	Detected	Detected	Detected	Detected	Detected	Detected	Detected	Detected	0	A_33_P3375398	A_33_P3375398	NM_006453	NM_006453	NM_006453	Hs.513267	10607	TBL3
A_23_P209944	0.0387667	0.00211005	3.06778	up	148.941	44.6576	16.1782	22.2108	146.11	261.364	20.529	22.5844	50.1723	26.6226	69.9561	45.5698	7.29617	6.15781	5.52811	5.85629	6.30351	7.91919	5.157	4.95879	5.31498	4.82512	4.79465	4.30737	Detected	Detected	Not Detected	Detected	Detected	Detected	Detected	Detected	Detected	Detected	Detected	Detected	0	A_23_P209944	A_23_P209944	NM_017750	NM_017750	NM_017750	Hs.440401	54884	RETSAT
A_23_P44849	0.0387083	0.00208934	3.0668	up	2084.62	1233.69	123.015	235.55	1532.21	1554.74	139.756	230.472	455.622	99.3822	528.001	160.425	10.6809	10.0835	8.43385	9.12665	9.55686	10.3131	8.17889	8.75789	8.57922	7.39143	8.45834	7.12864	Detected	Detected	Detected	Detected	Detected	Detected	Detected	Detected	Detected	Detected	Detected	Detected	0	A_23_P44849	A_23_P44849	NM_178863	NM_178863	NM_178863	Hs.534590	253980	KCTD13
A_33_P3351991	0.0352533	0.00151238	3.06421	up	258.484	427.314	32.4482	44.739	281.456	225.012	35.2046	33.8651	85.7165	29.5798	197.044	80.2072	7.94592	8.71383	6.53357	6.89586	7.17888	7.73877	6.04076	5.6327	6.11697	5.01723	6.87747	5.62861	Detected	Detected	Detected	Detected	Detected	Detected	Detected	Detected	Detected	Detected	Detected	Detected	0	A_33_P3351991	A_33_P3351991	AK127505		AK127505
A_33_P3370881	0.0335302	0.00120348	3.0638	up	42.4657	35.1857	5.97153	7.31918	49.5457	22.967	8.27176	4.90012	21.6637	10.6219	31.2848	24.905	5.83977	5.91093	4.1792	4.22446	4.85756	4.7948	3.77721	2.83268	4.02095	3.36472	3.0916	3.02764	Detected	Detected	Not Detected	Not Detected	Detected	Detected	Not Detected	Not Detected	Detected	Not Detected	Detected	Detected	0	A_33_P3370881	A_33_P3370881	ENST00000597630	XM_005259448	XM_005259448	Hs.590950
A_33_P3411427	0.0254975	0.000210095	3.06	up	92.1717	45.2476	13.6487	15.9975	34.6671	27.7288	19.1554	11.6205	32.2802	11.9568	29.7624	26.7756	6.74236	6.16928	5.28937	5.34963	4.32879	5.06213	5.04661	3.87583	4.64382	3.52604	3.00043	3.16765	Detected	Detected	Not Detected	Detected	Detected	Detected	Detected	Not Detected	Detected	Not Detected	Detected	Detected	0	A_33_P3411427	A_33_P3411427	NM_138466	NM_138466	NM_138466	Hs.222236	116412	ZNF837
A_21_P0012946	0.0301209	0.000668452	3.05978	up	26.186	73.1835	8.45406	8.41931	110.267	28.3677	13.983	13.1171	21.723	7.60967	37.9506	28.7422	5.27178	6.68074	4.63174	4.41349	5.94764	5.09686	4.5439	4.05825	4.02588	2.98034	3.44955	3.30377	Detected	Detected	Not Detected	Not Detected	Detected	Detected	Detected	Detected	Detected	Not Detected	Detected	Detected	0	A_21_P0012946	A_21_P0012946	NM_001276713	NM_001276713		Hs.370455	728780	ANKDD1B
A_24_P51909	0.0263806	0.000280942	3.05815	up	68.2732	32.8704	13.4604	10.5125	143.708	23.6091	11.5662	10.5585	35.5787	6.73871	60.3607	33.0691	6.3963	5.84208	5.27094	4.7254	6.28338	4.83482	4.24917	3.73867	4.79085	2.84659	4.46889	3.58279	Detected	Detected	Detected	Not Detected	Detected	Detected	Not Detected	Not Detected	Detected	Not Detected	Detected	Detected	0	A_24_P51909	A_24_P51909	NM_006651	NM_006651	NM_006651	Hs.478930	10815	CPLX1
A_24_P47988	0.0341528	0.00130376	3.0558	up	33.1081	28.315	5.47818	3.16017	98.6074	31.1934	4.55381	7.04451	14.7018	8.13328	43.1945	28.6345	5.5505	5.69119	4.06616	3.10894	5.8054	5.22736	3.05317	3.22095	3.43969	3.05454	3.71545	3.29646	Detected	Detected	Not Detected	Not Detected	Detected	Detected	Not Detected	Not Detected	Not Detected	Not Detected	Detected	Detected	0	A_24_P47988	A_24_P47988	NM_025165	NM_025165	NM_025165	Hs.706346	80237	ELL3
A_21_P0011498	0.0250229	0.000157736	3.05562	up	116.449	93.7664	57.6927	64.63	81.4815	91.3477	36.1681	30.0702	73.5795	31.321	52.0966	50.5554	7.00282	6.95362	7.36423	7.40821	5.55586	6.61035	6.08455	5.43444	5.88904	5.12654	4.13693	4.55481	Detected	Detected	Detected	Detected	Detected	Detected	Detected	Detected	Detected	Detected	Detected	Detected	0	A_21_P0011498	A_21_P0011498	NR_109777	NR_109777		Hs.710310	100506281	LOC100506281
A_24_P343621	0.030849	0.000777937	3.05558	up	23.9726	23.5969	12.7525	13.3571	23.7895	48.9155	11.2425	9.10812	27.8135	12.5451	21.7577	19.5782	5.16993	5.51155	5.19401	5.07423	3.76868	5.84208	4.20591	3.5397	4.40926	3.59396	2.5226	2.62036	Detected	Detected	Not Detected	Detected	Detected	Detected	Not Detected	Not Detected	Detected	Not Detected	Detected	Detected	0	A_24_P343621	A_24_P343621	NM_024693	NM_024693	NM_024693	Hs.22242	79746	ECHDC3
A_33_P3384432	0.0250229	0.000117928	3.0534	up	75.8695	73.3077	72.2411	64.147	112.822	46.6479	19.547	31.9927	64.1826	32.6874	59.2607	48.0723	6.51268	6.68265	7.68316	7.39863	5.9771	5.7793	5.07884	5.53669	5.68576	5.20794	4.42681	4.43496	Detected	Detected	Detected	Detected	Detected	Detected	Detected	Detected	Detected	Detected	Detected	Detected	0	A_33_P3384432	A_33_P3384432	NM_001178138	NM_001178138	NM_001178138	Hs.379018	7029	TFDP2
A_23_P130753	0.0344409	0.00135922	3.05255	up	64.8395	26.3106	6.25759	10.2166	59.8363	14.2624	8.95367	21.5538	23.724	5.7351	18.9376	17.9358	6.33411	5.61979	4.23928	4.68385	5.13225	4.10285	3.88525	4.87951	4.16449	2.67925	2.35191	2.49166	Detected	Detected	Not Detected	Not Detected	Detected	Detected	Not Detected	Detected	Detected	Not Detected	Not Detected	Detected	0	A_23_P130753	A_23_P130753	NM_001352	NM_001352	NM_001352	Hs.414480	1628	DBP
A_33_P3326643	0.0393007	0.00221526	3.04919	up	289.237	363.642	31.2547	55.7182	234.419	348.961	41.3982	39.1041	115.167	29.6732	160.303	79.6458	8.08244	8.51537	6.47778	7.20861	6.94188	8.29914	6.30557	5.87714	6.55065	5.02273	6.50666	5.61191	Detected	Detected	Detected	Detected	Detected	Detected	Detected	Detected	Detected	Detected	Detected	Detected	0	A_33_P3326643	A_33_P3326643	NM_001277269	NM_001277269	NM_001277269	Hs.688380	340990	OTOG
A_33_P3780983	0.0278509	0.000374673	3.04327	up	139.896	122.011	13.9215	25.4148	41.8531	59.5454	21.708	23.3011	35.7715	17.0054	42.688	41.9399	7.21964	7.25032	5.31663	6.0592	4.61797	6.09367	5.25132	5.01179	4.79935	4.05034	3.69028	4.12064	Detected	Detected	Detected	Detected	Detected	Detected	Detected	Detected	Detected	Not Detected	Detected	Detected	0	A_33_P3780983	A_33_P3780983	NM_001177317	NM_001177317	NM_001177317	Hs.432442	142680	SLC34A3
A_24_P335202	0.0272478	0.000351208	3.04144	up	21.4267	26.5752	5.81711	2.19253	36.2134	14.1368	6.22422	7.5808	7.14321	3.51227	23.7083	12.1309	5.03343	5.62959	4.14554	2.47289	4.3953	4.09097	3.4206	3.30736	2.60084	2.13679	2.63862	2.03496	Detected	Detected	Not Detected	Not Detected	Detected	Detected	Not Detected	Not Detected	Not Detected	Not Detected	Not Detected	Not Detected	0	A_24_P335202	A_24_P335202	ENST00000534276	XM_005273884	XM_005273884	Hs.432379	25884	CHRDL2
A_23_P78595	0.0357836	0.00162982	3.03998	up	86.8102	61.3071	13.5461	4.16214	72.5109	33.3584	9.53206	13.4333	43.0803	8.69815	44.0995	24.6639	6.6729	6.49005	5.27889	3.51545	5.39688	5.32313	3.97655	4.09508	5.08339	3.12598	3.76057	3.01136	Detected	Detected	Detected	Not Detected	Detected	Detected	Not Detected	Detected	Detected	Not Detected	Detected	Detected	0	A_23_P78595	A_23_P78595	NM_033543	NM_033543	NM_033543	Hs.655885	90273	CEACAM21
A_33_P3237664	0.0439433	0.00304459	3.03983	up	28.7865	17.4279	3.99169	3.92407	120.975	14.3301	4.57569	5.32231	28.6959	3.1156	43.2855	12.0618	5.38502	5.22832	3.60966	3.43035	6.0641	4.10983	3.05862	2.92315	4.45914	2.01166	3.72021	2.03053	Detected	Detected	Not Detected	Not Detected	Detected	Detected	Not Detected	Not Detected	Detected	Not Detected	Detected	Not Detected	0	A_33_P3237664	A_33_P3237664	ENST00000459625		AK122588	Hs.200063	51564	HDAC7
A_24_P298013	0.0469847	0.00366935	3.03835	up	147.675	78.6816	25.7621	43.1559	298.53	92.0486	27.2294	26.4864	107.028	16.0315	174.216	30.8784	7.28498	6.75517	6.19218	6.8426	7.26187	6.6199	5.62817	5.22313	6.43736	3.95202	6.65483	3.44143	Detected	Detected	Detected	Detected	Detected	Detected	Detected	Detected	Detected	Not Detected	Detected	Detected	0	A_24_P298013	A_24_P298013	NM_019096	NM_019096	NM_019096	Hs.485449	54676	GTPBP2
A_33_P3271105	0.0315704	0.000889075	3.03776	up	79.5087	84.9273	19.8006	28.0569	302.411	65.629	30.0423	25.4242	60.6638	18.0686	73.1859	35.3461	6.57121	6.84364	5.81795	6.20906	7.27914	6.20913	5.78337	5.15445	5.60324	4.14919	4.89078	3.73105	Detected	Detected	Detected	Detected	Detected	Detected	Detected	Detected	Detected	Not Detected	Detected	Detected	0	A_33_P3271105	A_33_P3271105	NM_001135654	NM_001135654	NM_001135654	Hs.169900	8761	PABPC4
A_23_P129209	0.0308269	0.00075882	3.03664	up	262.451	266.922	74.3473	30.1103	1077.09	129.264	33.7448	107.752	130.793	35.0873	164.777	48.1733	7.96349	8.13929	7.72459	6.31706	9.05459	7.04293	5.96767	7.58153	6.74	5.34228	6.55672	4.43889	Detected	Detected	Detected	Detected	Detected	Detected	Detected	Detected	Detected	Detected	Detected	Detected	0	A_23_P129209	A_23_P129209	NM_002168	NM_002168	NM_002168	Hs.596461	3418	IDH2
A_23_P4144	0.0285517	0.000448052	3.03604	up	349.664	179.002	35.0473	46.7919	417.845	372.098	31.1658	46.3108	89.4956	34.6742	161.744	95.6863	8.3074	7.67644	6.64459	6.95837	7.71465	8.37776	5.84344	6.16058	6.18131	5.32054	6.5237	6.0365	Detected	Detected	Detected	Detected	Detected	Detected	Detected	Detected	Detected	Detected	Detected	Detected	0	A_23_P4144	A_23_P4144	NM_025233	NM_025233	NM_025233	Hs.296422	80347	COASY
A_33_P3215529	0.035166	0.00149898	3.036	up	222.508	422.857	44.6201	42.1118	193.262	286.571	76.9935	58.8332	114.679	22.3527	95.7909	61.3144	7.77381	8.70155	6.99373	6.80757	6.68689	8.03335	7.27996	6.57155	6.54403	4.51048	5.47665	5.00121	Detected	Detected	Detected	Detected	Detected	Detected	Detected	Detected	Detected	Detected	Detected	Detected	0	A_33_P3215529	A_33_P3215529	ENST00000413932		AF083893	Hs.50382	9414	TJP2
A_23_P371765	0.0319756	0.000972292	3.03387	up	216.992	1237.52	156.405	148.949	267.403	347.581	82.4904	103.099	137.705	48.7407	152.415	139.588	7.74441	10.089	8.78172	8.53672	7.11204	8.29458	7.38358	7.50542	6.81614	5.98268	6.41195	6.85174	Detected	Detected	Detected	Detected	Detected	Detected	Detected	Detected	Detected	Detected	Detected	Detected	0	A_23_P371765	A_23_P371765	NM_032261	NM_032261	NM_032261	Hs.381214	84221	SPATC1L
A_33_P3411414	0.0349735	0.00144754	3.03253	up	251.101	239.368	29.4091	41.199	294.764	159.207	38.915	35.9137	110.622	28.7459	137.963	47.7239	7.91463	8.01474	6.38589	6.77446	7.2435	7.30072	6.2049	5.73155	6.48593	4.96405	6.22645	4.41792	Detected	Detected	Detected	Detected	Detected	Detected	Detected	Detected	Detected	Detected	Detected	Detected	0	A_33_P3411414	A_33_P3411414	NM_001099684	NM_001099684	NM_001099684	Hs.6451	727866	FAM156B
A_24_P208345	0.0302635	0.000678789	3.03116	up	58.5658	19.2681	5.9739	7.31726	29.3055	20.0335	10.2437	9.0019	25.2269	3.53792	20.3745	18.8899	6.21269	5.32438	4.17978	4.22401	4.07626	4.59461	4.07436	3.52578	4.25861	2.14506	2.4404	2.56832	Detected	Detected	Not Detected	Not Detected	Detected	Detected	Not Detected	Not Detected	Detected	Not Detected	Detected	Detected	0	A_24_P208345	A_24_P208345	NM_033102	NM_033102	NM_033102	Hs.278695	85414	SLC45A3
A_24_P146211	0.0267948	0.000329387	3.03012	up	8755.27	6980.48	2186.17	5343.07	9544.98	7631.02	1334.45	2039.31	2555.63	1057.8	1556.81	1418.85	12.6954	12.4557	12.1779	13.1164	12.393	12.7282	11.2934	11.8219	11.0991	11.02	10.1394	10.5964	Detected	Detected	Detected	Detected	Detected	Detected	Detected	Detected	Detected	Detected	Detected	Detected	0	A_24_P146211	A_24_P146211	NM_021063	NM_021063	NM_021063	Hs.591797	3017	HIST1H2BD
A_33_P3272117	0.0294201	0.000584081	3.02954	up	707.91	601.227	138.136	105.637	741.142	827.591	64.5614	93.5752	358.185	54.9259	310.277	148.116	9.19966	9.13939	8.60278	8.0796	8.51689	9.45398	7.00488	7.34228	8.23596	6.22462	7.61669	6.97328	Detected	Detected	Detected	Detected	Detected	Detected	Detected	Detected	Detected	Detected	Detected	Detected	0	A_33_P3272117	A_33_P3272117	NM_024083	NM_024083	NM_024083	Hs.298351	79058	ASPSCR1
A_33_P3303910	0.0254975	0.000206866	3.02925	up	49.3914	52.3377	28.6169	26.1342	65.5169	33.7908	13.6841	10.7528	33.2081	29.1317	39.8437	45.2959	6.01403	6.31931	6.34766	6.10345	5.25793	5.33967	4.50925	3.76429	4.68744	4.98769	3.54674	4.29289	Detected	Detected	Detected	Detected	Detected	Detected	Not Detected	Not Detected	Detected	Detected	Detected	Detected	0	A_33_P3303910	A_33_P3303910	AK127323		AK127323	Hs.129195	9679	FAM53B
A_23_P393727	0.04969	0.0042814	3.02809	up	35.9716	23.1603	6.16277	9.12465	86.5983	22.0295	2.14784	13.4218	15.9836	8.30258	70.5947	35.6248	5.6475	5.49448	4.21917	4.52357	5.6339	4.73597	1.36792	4.09354	3.56125	3.07621	4.81477	3.75047	Detected	Detected	Not Detected	Not Detected	Detected	Detected	Not Detected	Detected	Detected	Not Detected	Detected	Detected	0	A_23_P393727	A_23_P393727	NM_201266	NM_201266	NM_201266	Hs.471200	8828	NRP2
A_33_P3603812	0.0315704	0.000883534	3.02777	up	60.6688	61.933	23.1268	16.5857	217.586	138.075	21.5237	16.8677	50.8308	18.4295	94.637	38.3523	6.25643	6.50056	6.0367	5.41079	6.84491	7.1264	5.23705	4.4673	5.3362	4.18257	5.45213	3.91103	Detected	Detected	Detected	Detected	Detected	Detected	Detected	Detected	Detected	Detected	Detected	Detected	0	A_33_P3603812	A_33_P3603812	NM_001300833	NM_001300833	NM_001300833	Hs.578433	83786	FRMD8
A_23_P17330	0.0393007	0.00220424	3.02314	up	1377.69	2070.55	313.527	347.984	1366.9	1249.8	163.424	252.147	791.171	79.7259	877.905	162.401	10.086	10.7912	9.71658	9.64109	9.38454	10.0206	8.41571	8.89227	9.39276	6.96893	9.24089	7.15323	Detected	Detected	Detected	Detected	Detected	Detected	Detected	Detected	Detected	Detected	Detected	Detected	0	A_23_P17330	A_23_P17330	NM_017859	NM_017859	NM_017859	Hs.504998	54963	UCKL1
A_33_P3343412	0.0304435	0.000710904	3.02282	up	59.7345	22.052	7.39702	23.3755	90.5814	41.9651	10.6089	12.629	28.0251	12.1104	53.497	32.4377	6.23766	5.44808	4.45501	5.92949	5.69431	5.63947	4.12202	4.00231	4.42105	3.54402	4.19776	3.54149	Detected	Detected	Not Detected	Detected	Detected	Detected	Not Detected	Not Detected	Detected	Not Detected	Detected	Detected	0	A_33_P3343412	A_33_P3343412	AK096092		AK096092		284808	FLJ38773
A_33_P3343737	0.0355502	0.00157672	3.02142	up	44.9131	65.1746	5.81877	15.8331	67.5188	58.393	15.0823	20.7441	26.4965	9.10811	41.9525	25.6052	5.90348	6.55642	4.14595	5.33302	5.29855	6.06723	4.66079	4.81477	4.3359	3.1787	3.65845	3.08468	Detected	Detected	Not Detected	Detected	Detected	Detected	Detected	Detected	Detected	Not Detected	Detected	Detected	0	A_33_P3343737	A_33_P3343737	NM_005747	NM_005747	NM_005747	Hs.181289	10136	CELA3A
A_33_P3355266	0.0344409	0.00135695	3.02041	up	28.1519	29.0052	7.7268	15.0696	95.1725	68.3161	7.98817	12.9645	33.5751	10.8445	51.8409	28.5623	5.35672	5.71511	4.51027	5.25381	5.76029	6.25719	3.72972	4.03957	4.70273	3.39352	4.12731	3.29209	Detected	Detected	Not Detected	Detected	Detected	Detected	Not Detected	Detected	Detected	Not Detected	Detected	Detected	0	A_33_P3355266	A_33_P3355266	NM_022164	NM_022164	NM_022164	Hs.199368	64129	TINAGL1
A_33_P3235217	0.0357836	0.00163098	3.01906	up	26.7813	12.7791	19.5257	10.8809	84.687	53.0828	3.4787	24.1664	13.6115	12.8288	59.9178	33.8493	5.29772	4.94294	5.79705	4.77809	5.60592	5.94625	2.68886	5.07153	3.33342	3.62283	4.45186	3.63487	Detected	Not Detected	Detected	Not Detected	Detected	Detected	Not Detected	Detected	Not Detected	Not Detected	Detected	Detected	0	A_33_P3235217	A_33_P3235217	NM_001905	NM_001905	NM_001905	Hs.473087	1503	CTPS1
A_33_P3287584	0.0281925	0.000390226	3.01801	up	122.054	74.2971	167.72	44.104	355.319	79.4881	20.9544	28.0921	90.9615	30.1122	197.745	67.4358	7.05622	6.69671	8.87387	6.87486	7.49148	6.44677	5.19237	5.31938	6.2055	5.05084	6.88403	5.2262	Detected	Detected	Detected	Detected	Detected	Detected	Detected	Detected	Detected	Detected	Detected	Detected	0	A_33_P3287584	A_33_P3287584	NM_133471	NM_133471	NM_133471	Hs.101150	170954	PPP1R18
A_33_P3220277	0.0457813	0.00342805	3.01495	up	5739.67	3988.7	232.987	818.691	6237.67	4229.47	269.175	435.956	873.08	396.954	2558.91	451.453	12.1508	11.6812	9.33134	10.7273	11.7132	11.8145	9.13187	9.72765	9.55016	9.62492	10.9347	8.89609	Detected	Detected	Detected	Detected	Detected	Detected	Detected	Detected	Detected	Detected	Detected	Detected	0	A_33_P3220277	A_33_P3220277	ENST00000610403		BC009700	Hs.472213	6238	RRBP1
A_23_P208847	0.0357836	0.00163473	3.01294	up	10.452	17.4359	14.9042	8.59536	52.4074	37.0705	7.90625	13.4706	11.819	16.6046	22.5154	18.886	4.16954	5.22872	5.40892	4.44253	4.94162	5.4654	3.71585	4.09935	3.1492	4.01188	2.56539	2.56804	Not Detected	Detected	Detected	Not Detected	Detected	Detected	Not Detected	Detected	Not Detected	Detected	Detected	Detected	0	A_23_P208847	A_23_P208847	NM_016539	NM_016539	NM_016539	Hs.423756	51548	SIRT6
A_23_P313734	0.0341482	0.00129708	3.01104	up	132.019	123.77	20.9802	22.1643	96.5342	224.529	30.4732	30.7105	45.9423	24.0609	69.7815	44.3947	7.14892	7.26565	5.89918	5.85313	5.77827	7.73593	5.80663	5.47066	5.18285	4.64246	4.78978	4.24714	Detected	Detected	Detected	Detected	Detected	Detected	Detected	Detected	Detected	Detected	Detected	Detected	0	A_23_P313734	A_23_P313734	NM_033395	NM_033395	NM_033395	Hs.458418	85459	CEP295
A_23_P9289	0.0459203	0.00344909	3.00891	up	5682.45	7703.69	676.747	2131.81	2924.3	1149.79	599.62	382.144	1464.52	247.434	1738.97	477.906	12.1405	12.58	10.7026	11.9724	10.5327	9.9112	10.2466	9.52344	10.2932	8.93261	10.3228	8.98527	Detected	Detected	Detected	Detected	Detected	Detected	Detected	Detected	Detected	Detected	Detected	Detected	0	A_23_P9289	A_23_P9289	NM_134428	NM_134428	NM_134428	Hs.136829	5991	RFX3
A_24_P41371	0.0357834	0.00161714	3.00805	up	630.926	480.495	101.994	97.344	457.885	810.928	98.6334	117.687	211.275	51.1998	211.815	88.7509	9.05344	8.85691	8.16302	7.97081	7.83982	9.42977	7.65928	7.71797	7.4502	6.08329	7.00374	5.86632	Detected	Detected	Detected	Detected	Detected	Detected	Detected	Detected	Detected	Detected	Detected	Detected	0	A_24_P41371	A_24_P41371	NM_017721	NM_017721	NM_017721	Hs.269592	54862	CC2D1A
A_33_P3321836	0.0361037	0.00168612	3.00446	up	2767.07	3685.66	309.419	954.4	2695.38	3832.45	302.125	346.491	796.404	256.847	1495.54	397.873	11.0827	11.5685	9.70239	10.9186	10.4127	11.6581	9.28131	9.37929	9.40295	8.98405	10.08	8.69275	Detected	Detected	Detected	Detected	Detected	Detected	Detected	Detected	Detected	Detected	Detected	Detected	0	A_33_P3321836	A_33_P3321836	NM_012401	NM_012401	NM_012401	Hs.3989	23654	PLXNB2
A_33_P3420254	0.0313355	0.000810983	3.00335	up	81.0891	73.357	24.6794	33.8623	114.279	73.2877	29.3853	32.0888	54.0579	12.0179	56.6176	42.3788	6.59449	6.68344	6.13092	6.49513	5.99234	6.34494	5.74772	5.54106	5.43174	3.53395	4.32408	4.14328	Detected	Detected	Detected	Detected	Detected	Detected	Detected	Detected	Detected	Not Detected	Detected	Detected	0	A_33_P3420254	A_33_P3420254	NM_017802	NM_017802	NM_017802	Hs.535896	54919	DNAAF5
A_33_P3335629	0.0265471	0.000284825	3.00282	up	177.505	120.993	47.5111	66.842	362.868	136.39	33.8147	36.8172	83.4465	27.9501	166.223	63.5697	7.5028	7.23992	7.0849	7.45219	7.52107	7.11099	5.97035	5.77451	6.07787	4.9141	6.57234	5.08479	Detected	Detected	Detected	Detected	Detected	Detected	Detected	Detected	Detected	Detected	Detected	Detected	0	A_33_P3335629	A_33_P3335629	NM_014187	NM_014187	NM_014187	Hs.433203	29100	TMEM208
A_33_P3380346	0.0258313	0.000225719	3.00257	up	398.466	329.671	77.15	82.9849	317.592	161.784	43.3705	41.2144	120.16	55.6779	142.721	95.5055	8.46615	8.38648	7.77465	7.7608	7.34686	7.32005	6.37945	5.96501	6.61462	6.2548	6.29193	6.03197	Detected	Detected	Detected	Detected	Detected	Detected	Detected	Detected	Detected	Detected	Detected	Detected	0	A_33_P3380346	A_33_P3380346	NM_133330	NM_133330	NM_133330	Hs.113876	7468	WHSC1
A_24_P96234	0.0378425	0.00195044	3.00222	up	29.3529	26.2773	9.45764	3.67028	70.2836	30.3306	4.67636	13.1297	37.8968	5.2923	34.0982	15.4313	5.408	5.61879	4.78787	3.33223	5.35419	5.18912	3.08629	4.05978	4.88717	2.59407	3.25119	2.29552	Detected	Detected	Not Detected	Not Detected	Detected	Detected	Not Detected	Detected	Detected	Not Detected	Detected	Not Detected	0	A_24_P96234	A_24_P96234	NM_031209	NM_031209	NM_031209	Hs.631638	81890	QTRT1
A_24_P61772	0.0347203	0.00141265	3.00164	up	335.118	254.824	26.1698	89.725	155.86	77.1499	35.0494	28.2816	69.3041	35.6081	97.7207	80.8757	8.2537	8.08696	6.21533	7.86159	6.39053	6.40955	6.03401	5.3309	5.79698	5.37021	5.52127	5.64979	Detected	Detected	Detected	Detected	Detected	Detected	Detected	Detected	Detected	Detected	Detected	Detected	0	A_24_P61772	A_24_P61772	ENST00000261651	XM_006710029	XM_006710029		96597	TBC1D27
A_23_P167201	0.02738	0.00035452	3.00096	up	75.2042	76.0183	19.1699	28.3402	82.4124	42.3453	15.0369	13.1063	41.1339	26.6146	45.4154	50.4348	6.50256	6.71962	5.77166	6.2216	5.57108	5.65258	4.65501	4.05703	5.01391	4.82431	3.82829	4.54801	Detected	Detected	Detected	Detected	Detected	Detected	Detected	Not Detected	Detected	Detected	Detected	Detected	0	A_23_P167201	A_23_P167201	NM_016955	NM_016955	NM_016955	Hs.253305	51091	SEPSECS
A_33_P3343479	0.0283053	0.000404216	2.99065	up	43.3045	72.6135	16.2545	22.6674	29.9587	42.04	11.6419	12.6013	29.528	18.333	37.8418	37.1881	5.86066	6.67054	5.5363	5.88476	4.11084	5.64219	4.25861	3.99915	4.50239	4.17352	3.44299	3.8459	Detected	Detected	Detected	Detected	Detected	Detected	Not Detected	Detected	Detected	Detected	Detected	Detected	0	A_33_P3343479	A_33_P3343479	ENST00000484153		AL833920	Hs.585415
A_23_P433785	0.0490524	0.00415841	2.98751	up	85.2967	81.6567	7.43353	22.2001	496.403	71.7653	20.9106	18.7233	51.0235	18.9853	75.7454	43.4727	6.65374	6.80143	4.46228	5.85546	7.95569	6.31706	5.18833	4.64354	5.34102	4.23309	4.96826	4.19776	Detected	Detected	Not Detected	Detected	Detected	Detected	Detected	Detected	Detected	Detected	Detected	Detected	0	A_23_P433785	A_23_P433785	NM_002561	NM_002561	NM_002561	Hs.731607	5026	P2RX5
A_23_P55091	0.0338735	0.00124077	2.98529	up	1665.42	826.394	203.366	566.697	1128.54	1449.66	135.581	207.35	406.175	145.264	578.492	179.584	10.3414	9.54646	9.14838	10.2654	9.1179	10.222	8.13272	8.59588	8.41916	8.07333	8.60799	7.34521	Detected	Detected	Detected	Detected	Detected	Detected	Detected	Detected	Detected	Detected	Detected	Detected	0	A_23_P55091	A_23_P55091	NM_017647	NM_017647	NM_017647	Hs.463785	117246	FTSJ3
A_33_P3307660	0.0313355	0.000811966	2.98475	up	123.12	218.551	63.3797	78.5663	312.462	114.452	39.8731	37.4098	123.595	24.7035	144.664	66.6726	7.06694	7.90633	7.50029	7.67899	7.32707	6.89061	6.24403	5.80446	6.65381	4.6869	6.31728	5.19807	Detected	Detected	Detected	Detected	Detected	Detected	Detected	Detected	Detected	Detected	Detected	Detected	0	A_33_P3307660	A_33_P3307660	NM_001184854	NM_001184854	NM_001184854	Hs.123450	54758	KLHDC4
A_32_P208823	0.0387667	0.00210992	2.9843	up	75.4397	41.5647	17.06	14.2637	148.282	167.953	18.4263	18.6646	43.8245	24.5655	55.7301	37.9316	6.50586	6.08323	5.60153	5.17144	6.32312	7.36716	4.98554	4.63914	5.11049	4.67649	4.29001	3.88633	Detected	Detected	Detected	Detected	Detected	Detected	Detected	Detected	Detected	Detected	Detected	Detected	0	A_32_P208823	A_32_P208823	NM_020405	NM_020405	NM_020405	Hs.125036	57125	PLXDC1
A_32_P902988	0.032985	0.00109099	2.98142	up	28.3853	14.655	52.3655	20.4181	18.449	12.3199	5.03785	10.6901	24.6571	17.1372	20.9389	32.4815	5.3675	5.06779	7.22136	5.72913	3.41081	3.89879	3.17671	3.75699	4.22438	4.06295	2.47426	3.54411	Detected	Detected	Detected	Detected	Detected	Not Detected	Not Detected	Not Detected	Detected	Detected	Detected	Detected	0	A_32_P902988	A_32_P902988	NM_002379	NM_002379	NM_002379	Hs.150366	4146	MATN1
A_23_P250874	0.0352533	0.00151143	2.98133	up	38.2804	17.3497	3.04452	5.42107	22.9141	20.2735	6.521	3.73891	11.7181	4.39769	28.3566	16.0759	5.7171	5.22443	3.145	3.85126	3.71459	4.6129	3.47613	2.54719	3.13938	2.38422	2.91573	2.34689	Detected	Detected	Not Detected	Not Detected	Detected	Detected	Not Detected	Not Detected	Not Detected	Not Detected	Detected	Detected	0	A_23_P250874	A_23_P250874	NM_003602	NM_003602	NM_003602	Hs.661266	8468	FKBP6
A_23_P53588	0.0315047	0.000870439	2.97892	up	82.6962	92.2955	42.4585	56.47	60.3253	35.3069	44.797	15.5811	51.4044	26.4112	41.7776	43.6492	6.61789	6.93612	6.92139	7.22548	5.14368	5.39688	6.43248	4.33794	5.35435	4.8101	3.65137	4.20645	Detected	Detected	Detected	Detected	Detected	Detected	Detected	Detected	Detected	Detected	Detected	Detected	0	A_23_P53588	A_23_P53588	NM_030775	NM_030775	NM_030775	Hs.306051	81029	WNT5B
A_23_P371129	0.0250229	0.000179145	2.97701	up	93.8377	60.515	27.0453	25.9938	109.912	86.9477	18.5472	24.5251	46.0809	26.3979	58.7885	42.4555	6.76184	6.47651	6.26295	6.09312	5.94387	6.54928	4.99618	5.09747	5.18668	4.80948	4.40746	4.14711	Detected	Detected	Detected	Detected	Detected	Detected	Detected	Detected	Detected	Detected	Detected	Detected	0	A_23_P371129	A_23_P371129	NM_032444	NM_032444	NM_032444	Hs.143681	84464	SLX4
A_23_P92261	0.0250229	0.00012085	2.97602	up	28.7636	18.8003	13.4324	9.95107	40.4652	36.8948	12.2703	11.4036	19.2133	7.86329	24.7642	30.9193	5.38354	5.30096	5.26823	4.6459	4.56161	5.45861	4.33889	3.84969	3.83063	3.01567	2.69977	3.4439	Detected	Not Detected	Detected	Not Detected	Detected	Detected	Not Detected	Not Detected	Detected	Not Detected	Not Detected	Detected	0	A_23_P92261	A_23_P92261	NM_032331	NM_032331	NM_032331	Hs.146161	9718	ECE2
A_23_P10194	0.0290935	0.000506273	2.97457	up	56.6961	46.602	35.8509	40.3699	116.552	27.7734	29.5135	23.9435	34.8897	18.3991	51.9832	32.7771	6.17498	6.1996	6.67725	6.74577	6.01817	5.06507	5.75364	5.05621	4.76004	4.1792	4.13344	3.56223	Detected	Detected	Detected	Detected	Detected	Detected	Detected	Detected	Detected	Detected	Detected	Detected	0	A_23_P10194	A_23_P10194	NM_201575	NM_201575	NM_201575	Hs.6314	26470	SEZ6L2
A_33_P3299140	0.0267944	0.000320668	2.97388	up	49.1882	47.6483	13.1478	12.5278	58.1671	31.3468	12.0931	8.96824	19.9064	17.0035	47.9796	33.5959	6.00874	6.22271	5.23943	4.98231	5.09083	5.23415	4.31767	3.52224	3.88705	4.04988	3.94948	3.61775	Detected	Detected	Detected	Detected	Detected	Detected	Not Detected	Not Detected	Detected	Not Detected	Detected	Detected	0	A_33_P3299140	A_33_P3299140	ENST00000435745	XM_005272234	XM_005272234	Hs.495417	9328	GTF3C5
A_23_P81131	0.0407921	0.00243188	2.97376	up	1518.65	992.873	190.527	593.051	597.855	953.926	130.917	125.305	478.368	97.805	468.209	207.801	10.2181	9.78237	9.05073	10.3117	8.21833	9.65024	8.07996	7.81644	8.64735	7.36341	8.27112	7.61956	Detected	Detected	Detected	Detected	Detected	Detected	Detected	Detected	Detected	Detected	Detected	Detected	0	A_23_P81131	A_23_P81131	NM_006587	NM_006587	NM_006587	Hs.518618	10699	CORIN
A_21_P0010204	0.0250229	0.000166345	2.97342	up	106.685	134.169	66.2755	43.5327	233.762	85.1271	22.9525	47.1317	62.3232	23.382	100.178	71.5128	6.90397	7.35478	7.56262	6.85689	6.93818	6.52408	5.3436	6.19201	5.64408	4.58992	5.57363	5.36455	Detected	Detected	Detected	Detected	Detected	Detected	Detected	Detected	Detected	Detected	Detected	Detected	0	A_21_P0010204	A_21_P0010204	ENST00000448579			Hs.278704	400866	LINC00114
A_24_P230176	0.0318351	0.000928285	2.97026	up	154.505	194.703	45.199	43.6524	223.934	363.224	38.8532	43.0929	107.111	37.0958	97.5709	65.2552	7.33497	7.77437	7.01256	6.86091	6.8828	8.34863	6.20169	6.03935	6.43872	5.44577	5.5181	5.14706	Detected	Detected	Detected	Detected	Detected	Detected	Detected	Detected	Detected	Detected	Detected	Detected	0	A_24_P230176	A_24_P230176	NM_199287	NM_199287	NM_199287	Hs.744125	339230	CCDC137
A_33_P3419165	0.0384748	0.00205529	2.96892	up	73.006	46.883	7.95172	12.4181	62.7568	49.9765	4.77014	15.6923	25.2892	13.6571	62.0024	37.8268	6.47256	6.20525	4.54605	4.97082	5.19861	5.86882	3.11057	4.35043	4.26262	3.7117	4.52523	3.88195	Detected	Detected	Not Detected	Not Detected	Detected	Detected	Not Detected	Detected	Detected	Not Detected	Detected	Detected	0	A_33_P3419165	A_33_P3419165	NM_013342	NM_013342	NM_013342	Hs.590939	29844	TFPT
A_24_P703830	0.0339155	0.00125396	2.96752	up	67.1819	61.3697	14.8091	29.8095	46.2269	23.3365	11.16	15.606	35.7016	10.9021	47.7745	40.9446	6.37721	6.49161	5.40251	6.30276	4.76068	4.81743	4.19545	4.34088	4.79605	3.40058	3.93985	4.06387	Detected	Detected	Detected	Detected	Detected	Detected	Not Detected	Detected	Detected	Not Detected	Detected	Detected	0	A_24_P703830	A_24_P703830	NM_001098622	NM_001098622	NM_001098622	Hs.127982	342977	NANOS3
A_33_P3882624	0.0325138	0.00103877	2.96626	up	212.834	103.158	137.617	139.96	153.296	79.1979	53.5812	41.2626	63.0653	47.6023	100.72	71.4794	7.72122	7.05817	8.59859	8.45026	6.36933	6.44318	6.72023	5.96738	5.66101	5.93312	5.58446	5.36269	Detected	Detected	Detected	Detected	Detected	Detected	Detected	Detected	Detected	Detected	Detected	Detected	0	A_33_P3882624	A_33_P3882624	NM_015450	NM_015450	NM_015450	Hs.31968	25913	POT1
A_23_P37949	0.0425608	0.00275862	2.96468	up	249.634	232.631	26.0001	48.2677	479.999	167.104	35.8572	30.9477	94.5081	28.0043	314.051	51.3184	7.90602	7.97796	6.2055	7.00587	7.91	7.36067	6.07118	5.48357	6.25591	4.9181	7.63893	4.59105	Detected	Detected	Detected	Detected	Detected	Detected	Detected	Detected	Detected	Detected	Detected	Detected	0	A_23_P37949	A_23_P37949	NM_024339	NM_024339	NM_024339	Hs.412304	79228	THOC6
A_33_P3229918	0.0332836	0.00112557	2.96406	up	158.62	192.516	67.5195	156.467	184.05	75.9604	36.529	34.4413	131.951	35.7737	96.0585	77.2692	7.36367	7.75897	7.58583	8.60369	6.6215	6.39121	6.10064	5.66094	6.7523	5.38007	5.48303	5.54244	Detected	Detected	Detected	Detected	Detected	Detected	Detected	Detected	Detected	Detected	Detected	Detected	0	A_33_P3229918	A_33_P3229918	NM_001243168	NM_001243168	NM_001243168	Hs.169002	171558	PTCRA
A_24_P91701	0.0357836	0.00162466	2.96255	up	258.936	314.656	39.0498	51.3742	317.146	205.386	34.2352	34.3839	144.128	43.8056	143.523	64.8221	7.94902	8.33049	6.79765	7.09749	7.3446	7.61914	5.99069	5.65752	6.88536	5.77117	6.30254	5.13007	Detected	Detected	Detected	Detected	Detected	Detected	Detected	Detected	Detected	Detected	Detected	Detected	0	A_24_P91701	A_24_P91701	NM_016449	NM_016449	NM_016449	Hs.517466	51233	DRICH1
A_23_P117852	0.0380384	0.0020018	2.96207	up	20.5774	7.04732	31.7053	29.366	69.4246	81.9995	8.84767	21.3925	23.6975	18.6382	36.3872	42.1049	4.98509	4.41805	6.50128	6.27852	5.33781	6.48248	3.87103	4.86613	4.1631	4.20224	3.37239	4.1287	Detected	Not Detected	Detected	Detected	Detected	Detected	Not Detected	Detected	Detected	Detected	Detected	Detected	0	A_23_P117852	A_23_P117852	NM_014736	NM_014736	NM_014736	Hs.81892	9768	KIAA0101
A_23_P251505	0.033936	0.00126118	2.95405	up	1076.41	640.994	74.0395	104.447	654.046	609.696	69.9783	107.693	232.745	71.7037	248.396	114.197	9.74383	9.23368	7.7171	8.0643	8.35082	9.03806	7.1317	7.58094	7.59633	6.76269	7.26952	6.43045	Detected	Detected	Detected	Detected	Detected	Detected	Detected	Detected	Detected	Detected	Detected	Detected	0	A_23_P251505	A_23_P251505	NM_148956	NM_148956	NM_148956	Hs.647060	55695	NSUN5
A_23_P25475	0.0328176	0.00107644	2.95258	up	18.5367	15.0081	17.1481	14.2518	32.346	5.55402	9.29341	4.76417	9.11542	13.737	21.5353	20.7249	4.86066	5.09143	5.60843	5.17028	4.22761	2.94308	3.93985	2.80355	2.84566	3.72021	2.509	2.71136	Detected	Not Detected	Detected	Detected	Detected	Not Detected	Not Detected	Not Detected	Not Detected	Not Detected	Detected	Detected	0	A_23_P25475	A_23_P25475	NM_003578	NM_003578	NM_003578	Hs.656544	8435	SOAT2
A_23_P397055	0.0387667	0.00209752	2.95133	up	168.948	708.138	46.9779	73.4019	359.066	181.494	64.5819	52.941	100.054	30.1648	196.341	72.5528	7.44321	9.35126	7.07079	7.58332	7.50584	7.46601	7.00539	6.38596	6.33911	5.05464	6.86896	5.39819	Detected	Detected	Detected	Detected	Detected	Detected	Detected	Detected	Detected	Detected	Detected	Detected	0	A_23_P397055	A_23_P397055	NM_019015	NM_019015	NM_019015	Hs.647084	54480	CHPF2
[truncated: 1,850 more rows]
[truncated: 8 more columns]

## Sheet: CvsD
ProbeName	p (Corr)	p	FC (abs)	Regulation	C1:gProcessedSignal(raw)	C2:gProcessedSignal(raw)	C3:gProcessedSignal(raw)	C4:gProcessedSignal(raw)	C5:gProcessedSignal(raw)	C6:gProcessedSignal(raw)	D1:gProcessedSignal(raw)	D2:gProcessedSignal(raw)	D3:gProcessedSignal(raw)	D4:gProcessedSignal(raw)	D5:gProcessedSignal(raw)	D6:gProcessedSignal(raw)	C1:gProcessedSignal(normalized)	C2:gProcessedSignal(normalized)	C3:gProcessedSignal(normalized)	C4:gProcessedSignal(normalized)	C5:gProcessedSignal(normalized)	C6:gProcessedSignal(normalized)	D1:gProcessedSignal(normalized)	D2:gProcessedSignal(normalized)	D3:gProcessedSignal(normalized)	D4:gProcessedSignal(normalized)	D5:gProcessedSignal(normalized)	D6:gProcessedSignal(normalized)	C1:gFEFlags	C2:gFEFlags	C3:gFEFlags	C4:gFEFlags	C5:gFEFlags	C6:gFEFlags	D1:gFEFlags	D2:gFEFlags	D3:gFEFlags	D4:gFEFlags	D5:gFEFlags	D6:gFEFlags	ControlType	mRNA_ProbeName	ProbeID	PrimaryAccession	RefSeqAccession	GenbankAccession	UniGeneID	EntrezGeneID	GeneSymbol
[truncated: 842 more rows]
[truncated: 8 more columns]
